# Supplementary material for: Seed coat-derived brassinosteroid signaling regulates endosperm development
Source: Nat Commun. 2024 Oct 29;15:9352. doi: 10.1038/s41467-024-53671-x (PMC11522626; doi:10.1038/s41467-024-53671-x)
Supplement: Supplementary file 3 — Supplementary Data 1 [file 41467_2024_53671_MOESM3_ESM.xlsx]

## Sheet: Auxin_BL_Col0_all
Differentially expressed genes (DEG) in Col-0 treated with 2,4-D versus 2,4-D and epi-BL.
Name	baseMean	log2FoldChange	lfcSE	stat	pvalue	padj
AT1G01010	149.938	0.0505101	0.447116	0.112969	0.910055	0.967753
AT1G01020	42.8529	-0.736005	0.735928	-1.0001	0.31726	0.612514
AT1G01030	9.12427	-1.25944	2.13981	-0.588572	0.556148	0.796972
AT1G01040	1363.85	-0.768612	0.287042	-2.6777	0.00741291	0.064484
AT1G01050	1584.25	-0.0663534	0.220146	-0.301407	0.763104	0.909624
AT1G01060	918.467	3.51078	1.82086	1.92809	0.0538434	0.226469
AT1G01070	576.158	-1.83404	0.466056	-3.93524	8.31e-05	0.00230163
AT1G01080	128.393	0.0516937	0.466421	0.110831	0.911751	0.968033
AT1G01090	2228.02	0.172037	0.261273	0.658457	0.510245	0.768802
AT1G01100	3373.77	-0.10625	0.238309	-0.445849	0.655706	0.856575
AT1G01110	44.604	1.32715	0.874398	1.51779	0.129068	0.374737
AT1G01120	3903.12	0.680337	0.241138	2.82136	0.00478203	0.0471325
AT1G01140	2035.16	-0.294985	0.282306	-1.04491	0.296063	0.590647
AT1G01160	959.619	0.206782	0.282859	0.731042	0.464754	0.737639
AT1G01170	252.002	-0.0460595	0.472395	-0.097502	0.922328	0.970735
AT1G01180	591.526	-0.165268	0.260467	-0.634508	0.525749	0.779236
AT1G01190	3.62227	4.88336	2.98233	1.63744	0.10154	NA
AT1G01200	2.72828	4.472	3.77379	1.18502	0.236011	NA
AT1G01210	152.611	-0.315872	0.430361	-0.73397	0.462967	0.736159
AT1G01220	277.189	0.0115847	0.399108	0.0290264	0.976844	0.990559
AT1G01225	90.2211	0.219425	0.713727	0.307436	0.758512	0.906791
AT1G01230	532.13	-0.779223	0.303049	-2.57128	0.0101324	0.0790932
AT1G01240	1679.45	-0.146143	0.284634	-0.513441	0.607643	0.830021
AT1G01250	45.1172	1.34323	0.783231	1.71498	0.0863486	0.298849
AT1G01260	304.395	1.0184	0.34027	2.99291	0.00276332	0.0322343
AT1G01290	120.077	0.236475	0.627821	0.37666	0.706426	0.884002
AT1G01300	1422.31	0.777579	0.354818	2.19149	0.0284166	0.152627
AT1G01305	39.7619	-1.20027	0.780108	-1.53859	0.123904	0.365611
AT1G01310	111.391	4.43096	0.912442	4.85615	1.2e-06	8.15e-05
AT1G01320	1660.33	-0.00799374	0.283444	-0.0282022	0.977501	0.990976
AT1G01340	3.38914	4.77932	3.53415	1.35232	0.176272	NA
AT1G01350	452.164	0.282312	0.341241	0.827312	0.408061	0.69177
AT1G01355	14.6105	0.107647	1.16366	0.0925075	0.926295	0.972302
AT1G01360	1174.97	0.0104808	0.294082	0.0356392	0.97157	0.989299
AT1G01370	66.3642	-0.740782	0.662727	-1.11778	0.263662	0.556836
AT1G01380	2.55413	2.7988	3.5359	0.791538	0.42863	NA
AT1G01390	3.69518	1.59412	3.0496	0.522729	0.601163	NA
AT1G01420	11.8015	0.623217	1.91614	0.325247	0.744994	0.900768
AT1G01430	1186.74	-0.0674811	0.25671	-0.262869	0.792651	0.92186
AT1G01440	401.857	0.411348	0.385815	1.06618	0.286343	0.580244
AT1G01450	122.994	-0.406723	0.50752	-0.801394	0.422904	0.704771
AT1G01453	7.94262	0.769105	1.55926	0.493251	0.621835	0.838782
AT1G01460	12.8596	3.16969	1.66898	1.89918	0.0575406	0.234979
AT1G01470	289.022	-0.33024	0.37155	-0.888819	0.374101	0.664204
AT1G01480	863.858	0.260917	0.325188	0.802358	0.422346	0.704389
AT1G01490	1547.66	0.371735	0.281869	1.31882	0.187229	0.46276
AT1G01500	426.772	-0.25958	0.455831	-0.569465	0.569041	0.806465
AT1G01510	432.783	0.539206	0.312248	1.72685	0.0841945	0.294604
AT1G01520	8.76621	-1.88612	2.29721	-0.821049	0.411618	0.695218
AT1G01530	6.59754	1.10852	2.55635	0.433633	0.664555	0.861627
AT1G01540	607.409	-0.0164357	0.429092	-0.0383035	0.969446	0.988408
AT1G01550	8154.7	-0.355496	0.241354	-1.47292	0.140772	0.393633
AT1G01560	126.612	-0.662636	0.504665	-1.31302	0.189175	0.464369
AT1G01570	87.7936	-0.478862	0.708146	-0.67622	0.498901	0.761175
AT1G01580	2.02965	4.0389	4.42869	0.911984	0.361777	NA
AT1G01590	39.0384	1.04021	1.11539	0.932592	0.351031	0.644721
AT1G01600	240.816	-0.281547	0.485051	-0.580448	0.561613	0.80076
AT1G01610	2966.4	-0.124037	0.293763	-0.422236	0.672853	0.86712
AT1G01620	9363.25	-0.449425	0.260136	-1.72765	0.0840504	0.294505
AT1G01630	102.461	-0.965249	0.601207	-1.60552	0.10838	0.33962
AT1G01640	131.306	-0.739774	0.487265	-1.51822	0.12896	0.374692
AT1G01650	3912.81	-0.756177	0.243591	-3.10429	0.00190735	0.0245975
AT1G01660	20.1198	3.22431	1.22382	2.63463	0.00842291	0.0701688
AT1G01670	94.7521	-0.995352	0.630767	-1.578	0.114565	0.349617
AT1G01680	38.5868	-1.7466	1.23697	-1.412	0.157949	0.420737
AT1G01690	60.202	0.959463	0.68628	1.39806	0.162094	0.427307
AT1G01700	16.4749	5.60472	1.9078	2.93779	0.00330559	0.0366868
AT1G01710	1294.59	-0.726848	0.262722	-2.7666	0.00566435	0.0533411
AT1G01720	5711.25	-1.37709	0.273618	-5.0329	4.83e-07	4.01e-05
AT1G01725	198.641	-0.590763	0.575894	-1.02582	0.304977	0.59918
AT1G01730	1487.45	0.200626	0.289691	0.692551	0.488591	0.755037
AT1G01740	41.4056	0.703681	0.822604	0.85543	0.392313	0.679291
AT1G01750	10.8592	3.96758	1.82351	2.1758	0.0295705	0.156628
AT1G01760	34.7298	0.754452	0.856952	0.880389	0.378649	0.668375
AT1G01770	918.401	-0.187269	0.339167	-0.552143	0.580851	0.813059
AT1G01780	435.982	-0.0194311	0.368542	-0.0527243	0.957952	0.984431
AT1G01790	377.04	-0.153388	0.361445	-0.424376	0.671292	0.866443
AT1G01800	325.058	0.898981	0.37758	2.3809	0.0172703	0.111598
AT1G01810	51.0739	0.602574	0.717766	0.839513	0.401181	0.686835
AT1G01820	1329.4	-0.830348	0.28802	-2.88295	0.00393971	0.0415156
AT1G01830	2250.43	0.297431	0.249123	1.19391	0.232513	0.520189
AT1G01840	19.2583	-1.87389	1.47453	-1.27084	0.203786	0.482231
AT1G01860	81.977	-1.29077	0.785505	-1.64324	0.100333	0.32536
AT1G01880	72.1749	0.645225	0.77034	0.837584	0.402264	0.687868
AT1G01900	1957.7	-0.118695	0.282183	-0.420632	0.674024	0.867682
AT1G01910	717.295	-0.291279	0.26615	-1.09441	0.273774	0.567378
AT1G01920	105.967	1.99713	0.511651	3.90331	9.49e-05	0.00255367
AT1G01930	236.876	0.500188	0.466744	1.07165	0.283876	0.578559
AT1G01940	187.643	-0.058498	0.408512	-0.143198	0.886134	0.959101
AT1G01950	291.963	0.403369	0.442356	0.911866	0.361839	0.653613
AT1G01960	1618.74	-0.297643	0.261199	-1.13953	0.254483	0.546257
AT1G01970	176.617	-0.0245549	0.459406	-0.0534491	0.957374	0.984431
AT1G01980	220.496	5.33573	1.41074	3.78221	0.000155442	0.00371568
AT1G01990	557.451	-0.345113	0.334105	-1.03295	0.301629	0.595958
AT1G02000	2394.4	-0.599378	0.210188	-2.85163	0.00434961	0.0444866
AT1G02010	77.5961	0.682453	0.670963	1.01713	0.309094	0.603372
AT1G02020	451.438	-0.794046	0.326965	-2.42853	0.0151601	0.102344
AT1G02030	8.65631	-1.77075	1.83543	-0.964758	0.334666	0.629436
AT1G02050	113.191	0.441894	0.473874	0.932516	0.35107	0.644721
AT1G02060	45.0505	-0.0492249	1.07843	-0.0456449	0.963593	0.986585
AT1G02065	36.5106	0.766008	0.868632	0.881856	0.377855	0.667858
AT1G02070	62.6059	1.55818	1.01171	1.54014	0.123526	0.364924
AT1G02080	3335.68	-0.488313	0.279418	-1.74761	0.0805317	0.286948
AT1G02090	1192.87	-0.0362938	0.239774	-0.151367	0.879686	0.956827
AT1G02100	658.431	-0.454846	0.327881	-1.38723	0.165372	0.432139
AT1G02110	320.119	0.345562	0.402911	0.857663	0.391079	0.678324
AT1G02120	1361.63	-0.159461	0.308027	-0.517687	0.604677	0.827715
AT1G02130	864.327	-0.204965	0.277384	-0.738923	0.459953	0.733439
AT1G02140	1051.23	-0.312877	0.262163	-1.19344	0.232696	0.520374
AT1G02145	324.153	-0.439297	0.310724	-1.41378	0.157425	0.420072
AT1G02150	544.915	-0.0161834	0.303372	-0.0533452	0.957457	0.984431
AT1G02160	307.738	-0.509641	0.367339	-1.38739	0.165324	0.432107
AT1G02170	1432.89	-0.690179	0.270293	-2.55344	0.0106664	0.0820494
AT1G02180	101.906	0.232419	0.620095	0.374812	0.707801	0.884586
AT1G02190	28.9127	7.87621	1.72298	4.57126	4.85e-06	0.000252811
AT1G02205	2600.17	1.59814	0.332228	4.81038	1.51e-06	9.63e-05
AT1G02220	8.39428	-0.31507	1.53219	-0.205634	0.837077	0.941038
AT1G02230	9.8954	6.32521	2.35386	2.68717	0.0072061	0.0634548
AT1G02260	554.33	-0.406636	0.34947	-1.16358	0.244594	0.534248
AT1G02270	174.907	-0.158824	0.454179	-0.349695	0.726568	0.892302
AT1G02280	171.026	0.600297	0.449846	1.33445	0.182057	0.455869
AT1G02290	121.541	1.54876	0.496247	3.12095	0.00180267	0.0236705
AT1G02300	419.292	-1.67324	0.408777	-4.0933	4.25e-05	0.00138467
AT1G02305	6979.49	-0.951662	0.238778	-3.98555	6.73e-05	0.00194761
AT1G02310	188.904	0.221705	0.478708	0.463132	0.64327	0.849059
AT1G02330	247.017	0.374376	0.367338	1.01916	0.308127	0.602129
AT1G02335	292.413	0.00520827	0.399816	0.0130267	0.989607	0.995906
AT1G02340	237.295	0.0992465	0.397934	0.249405	0.803048	0.926384
AT1G02360	1.96608	4.00393	4.42922	0.903981	0.366005	NA
AT1G02370	22.8898	1.36869	1.08824	1.25771	0.208495	0.488158
AT1G02380	82.243	-0.33022	0.553262	-0.596859	0.550601	0.793168
AT1G02390	497.96	-0.0327534	0.358897	-0.0912611	0.927285	0.972527
AT1G02400	1571.95	-0.515415	0.270049	-1.9086	0.0563138	0.232593
AT1G02405	16.2129	-0.699301	1.33943	-0.52209	0.601607	0.825713
AT1G02410	413.667	0.0902478	0.352387	0.256104	0.79787	0.923809
AT1G02420	51.7291	0.398192	0.692811	0.574748	0.565462	0.80385
AT1G02430	4.45618	-1.47094	2.87738	-0.511209	0.609205	0.831012
AT1G02450	17.1664	3.26674	1.42717	2.28896	0.0220815	0.130504
AT1G02460	152.7	3.07541	0.681112	4.51528	6.32e-06	0.000309645
AT1G02470	664.141	-0.732924	0.363995	-2.01356	0.0440561	0.200479
AT1G02475	480.664	-0.150619	0.368772	-0.408434	0.682955	0.872189
AT1G02500	5332.99	0.294227	0.215841	1.36316	0.172831	0.442341
AT1G02520	76.3982	-0.307581	0.642203	-0.478947	0.631976	0.843667
AT1G02530	124.35	-1.11345	0.737565	-1.50963	0.131137	0.37801
AT1G02560	1935.49	-0.173376	0.206608	-0.839153	0.401383	0.686898
AT1G02570	3.56685	2.22623	2.57219	0.8655	0.386765	NA
AT1G02575	44.389	2.35735	1.03567	2.27616	0.0228366	0.133282
AT1G02580	1072.48	0.605675	0.293916	2.06071	0.0393311	0.186354
AT1G02610	315.26	-0.246219	0.31905	-0.771724	0.440278	0.718815
AT1G02620	29.4651	2.08529	1.17422	1.7759	0.0757495	0.276709
AT1G02630	102.49	3.15617	0.764	4.13111	3.61e-05	0.00122225
AT1G02640	3252.33	0.212461	0.21651	0.981302	0.326444	0.621705
AT1G02650	18.407	1.16198	1.13721	1.02177	0.306888	0.600657
AT1G02660	3286.34	-0.35634	0.212938	-1.67344	0.0942401	0.314551
AT1G02670	124.475	0.207151	0.7218	0.286992	0.774118	0.914234
AT1G02680	363.834	-0.2959	0.348753	-0.848452	0.396186	0.682861
AT1G02690	216.325	0.346062	0.439489	0.787419	0.431037	0.710853
AT1G02700	10.1317	-0.104631	1.47168	-0.0710967	0.943321	0.979588
AT1G02720	172.917	0.343209	0.424001	0.809454	0.418254	0.700808
AT1G02730	384.782	1.15659	0.324295	3.56647	0.000361828	0.00713396
AT1G02740	171.158	0.436912	0.434222	1.00619	0.314322	0.609076
AT1G02750	208.629	-0.359011	0.525096	-0.683705	0.494161	0.758561
AT1G02770	395.072	-0.350826	0.311575	-1.12597	0.260176	0.553167
AT1G02780	14510.7	-0.031715	0.23754	-0.133514	0.893787	0.962997
AT1G02790	779.344	3.57651	1.08755	3.28858	0.00100693	0.015269
AT1G02800	21.1203	-0.24563	1.20646	-0.203595	0.83867	0.941563
AT1G02810	59.0949	2.13155	0.666777	3.19679	0.00138966	0.0194833
AT1G02816	1624.28	-0.572953	0.272033	-2.10619	0.0351878	0.174135
AT1G02820	8.00167	0.423429	2.06559	0.204992	0.837579	0.941238
AT1G02840	2472.21	-0.507889	0.216678	-2.34398	0.0190792	0.118998
AT1G02850	1815.51	-0.56545	0.28253	-2.00138	0.0453516	0.204199
AT1G02860	924.018	-0.269513	0.288188	-0.935198	0.349686	0.64384
AT1G02870	176.128	-0.0883242	0.444047	-0.198907	0.842335	0.943304
AT1G02880	171.809	-0.0811076	0.55194	-0.14695	0.883171	0.958433
AT1G02890	2128.45	0.456499	0.243593	1.87402	0.0609277	0.243599
AT1G02900	18.1585	7.2046	1.90887	3.77427	0.000160479	0.00380395
AT1G02910	259.5	-0.0725128	0.376748	-0.19247	0.847374	0.945204
AT1G02920	2.05986	-0.189578	4.23638	-0.0447499	0.964307	NA
AT1G02930	1153.59	-1.14076	0.435484	-2.61952	0.00880544	0.0726143
AT1G02940	31.9169	1.03602	1.00705	1.02877	0.303587	0.598088
AT1G02950	140.881	0.208333	0.434386	0.479605	0.631508	0.843566
AT1G02960	87.0925	0.55196	0.561847	0.982402	0.325902	0.620908
AT1G02970	5.22897	2.83843	2.05842	1.37894	0.167914	0.435164
AT1G02980	27.6075	-0.204619	1.09713	-0.186505	0.852049	0.946627
AT1G02990	305.622	-0.24325	0.438831	-0.554313	0.579364	0.812316
AT1G03000	385.949	0.235914	0.312983	0.753761	0.450993	0.726613
AT1G03010	152.364	2.92545	0.569734	5.13476	2.83e-07	2.57e-05
AT1G03030	316.603	-0.323595	0.421714	-0.767334	0.442883	0.720622
AT1G03040	1426.89	-0.112477	0.218295	-0.515255	0.606375	0.829079
AT1G03050	75.576	3.65998	0.964359	3.79525	0.000147497	0.00358511
AT1G03055	7.48212	0.0760701	2.08223	0.0365329	0.970857	0.988926
AT1G03060	1488.69	-0.800494	0.308102	-2.59815	0.00937278	0.0755732
AT1G03070	67.5515	-0.0777211	0.704476	-0.110325	0.912152	0.968033
AT1G03080	2290.12	0.16882	0.305101	0.553325	0.580041	0.812736
AT1G03090	544.371	0.744454	0.306286	2.43058	0.0150746	0.101972
AT1G03100	22.7737	0.170094	1.0092	0.168543	0.866156	0.951715
AT1G03106	3.85068	2.34061	2.69097	0.869803	0.384408	0.672572
AT1G03110	53.8319	0.562811	0.731288	0.769616	0.441528	0.719571
AT1G03130	1365.88	0.525845	0.225296	2.33402	0.0195949	0.12116
AT1G03140	1086.98	0.422714	0.235305	1.79645	0.0724235	0.269168
AT1G03150	124.17	-0.113778	0.503861	-0.225812	0.821348	0.934209
AT1G03160	104.45	-0.129546	0.604064	-0.214457	0.83019	0.938378
AT1G03170	787.907	5.68753	0.529685	10.7376	6.78e-27	3.4e-23
AT1G03180	25.8524	-0.45161	1.19553	-0.37775	0.705616	0.883759
AT1G03190	356.824	0.148729	0.314244	0.47329	0.636006	0.845586
AT1G03200	11.1602	-1.95111	1.87371	-1.04131	0.297733	0.592393
AT1G03210	57.7848	0.110817	0.868572	0.127585	0.898477	0.964211
AT1G03220	30280.9	0.131059	0.254428	0.515113	0.606474	0.829148
AT1G03230	177.604	0.0470966	0.482782	0.0975524	0.922288	0.970735
AT1G03250	760.659	0.393424	0.284504	1.38284	0.166713	0.434158
AT1G03260	144.879	0.093032	0.544685	0.1708	0.864381	0.951088
AT1G03270	32.5066	-0.240537	1.02801	-0.233984	0.814997	0.931445
AT1G03280	951.932	0.33302	0.362821	0.917864	0.35869	0.6513
AT1G03290	1336.1	0.55471	0.271425	2.0437	0.0409836	0.191261
AT1G03300	68.0114	2.56012	0.748849	3.41874	0.000629128	0.0108328
AT1G03310	209.013	0.733406	0.392795	1.86715	0.0618809	0.245143
AT1G03320	2.23262	4.17677	4.42676	0.943527	0.345411	NA
AT1G03330	412.691	-1.05628	0.357066	-2.95823	0.0030941	0.035017
AT1G03350	2067.47	0.461918	0.207119	2.23021	0.0257337	0.143574
AT1G03360	84.0144	1.5194	0.73483	2.06769	0.038669	0.184277
AT1G03365	183.92	0.15069	0.499299	0.301804	0.762801	0.90932
AT1G03370	363.096	0.990702	0.343673	2.88269	0.00394299	0.0415156
AT1G03380	818.901	-0.135803	0.280475	-0.484191	0.62825	0.841902
AT1G03390	7.01289	-3.60183	2.28177	-1.57852	0.114445	0.349356
AT1G03400	52.4344	-1.08343	0.789049	-1.37309	0.169726	0.43788
AT1G03410	434.743	1.04233	0.369723	2.81922	0.0048141	0.047402
AT1G03430	198.623	-0.115331	0.452301	-0.254987	0.798733	0.924145
AT1G03440	143.907	-0.146585	0.431947	-0.339359	0.734339	0.895907
AT1G03445	2.43164	4.30219	3.95508	1.08776	0.2767	NA
AT1G03457	29.992	-0.275307	0.856294	-0.321509	0.747824	0.90227
AT1G03470	110.656	-0.520623	0.554315	-0.939219	0.347619	0.642173
AT1G03475	530.223	0.103597	0.278686	0.371733	0.710092	0.885612
AT1G03495	411.431	-0.264403	0.386066	-0.684865	0.493429	0.758368
AT1G03510	12.8092	1.05885	1.90043	0.557162	0.577417	0.81165
AT1G03520	613.832	-0.196006	0.279757	-0.70063	0.483534	0.751413
AT1G03530	207.649	-0.0457121	0.467143	-0.0978547	0.922048	0.970735
AT1G03540	21.231	0.760305	1.46422	0.519254	0.603584	0.827001
AT1G03550	305.809	-0.0617297	0.342293	-0.180342	0.856884	0.948279
AT1G03560	162.13	-0.0259894	0.454039	-0.0572403	0.954354	0.983448
AT1G03590	1015.71	0.0455769	0.238906	0.190773	0.848703	0.945741
AT1G03600	939.613	0.230745	0.281327	0.8202	0.412102	0.695333
AT1G03610	786.743	-0.496831	0.284412	-1.74687	0.0806591	0.287279
AT1G03620	47.0156	-0.675328	1.09085	-0.619082	0.535863	0.785694
AT1G03630	428.246	1.12099	0.446465	2.51082	0.0120452	0.0884388
AT1G03650	8.30874	0.493758	2.03289	0.242885	0.808095	0.928419
AT1G03680	1154.49	-0.485901	0.270516	-1.7962	0.0724621	0.269262
AT1G03687	71.1407	-0.44259	0.812327	-0.544841	0.585863	0.815698
AT1G03710	1659.95	-0.915752	0.230607	-3.97104	7.16e-05	0.00204364
AT1G03730	247.256	-0.0709656	0.454346	-0.156193	0.875881	0.955107
AT1G03740	479.936	0.705784	0.306837	2.30019	0.0214374	0.128324
AT1G03750	182.139	1.19934	0.454711	2.6376	0.00834953	0.0698088
AT1G03760	103.758	0.4054	0.554545	0.73105	0.464749	0.737639
AT1G03770	94.3157	0.866466	0.56419	1.53577	0.124595	0.366627
AT1G03780	26.948	0.709227	1.0686	0.663696	0.506885	0.766262
AT1G03790	13.4963	2.5998	1.43945	1.80611	0.0709014	0.265892
AT1G03800	14.2919	6.86289	2.05266	3.34342	0.000827535	0.0130719
AT1G03820	21.1297	3.92058	1.23954	3.16294	0.00156183	0.0212878
AT1G03830	71.2521	0.182277	0.691949	0.263426	0.792222	0.921628
AT1G03840	301.952	-0.396645	0.508032	-0.780748	0.434951	0.714869
AT1G03850	208.751	0.904124	0.483199	1.87112	0.0613283	0.24441
AT1G03860	482.203	-0.0748068	0.302726	-0.247111	0.804822	0.926817
AT1G03870	256.117	-0.400212	0.468951	-0.853419	0.393427	0.680095
AT1G03900	2895.96	-0.353582	0.236209	-1.4969	0.134418	0.383286
AT1G03905	64.0837	-1.46451	0.618493	-2.36786	0.0178913	0.114362
AT1G03910	848.608	-0.0678692	0.277694	-0.244403	0.806919	0.927938
AT1G03920	47.0729	3.23189	0.873461	3.7001	0.000215514	0.00479167
AT1G03930	565.586	-0.129055	0.289465	-0.445841	0.655712	0.856575
AT1G03940	586.714	-0.781252	0.428629	-1.82268	0.0683521	0.260153
AT1G03950	568.379	0.134739	0.320922	0.41985	0.674595	0.867966
AT1G03960	333.678	-0.0958371	0.442288	-0.216685	0.828454	0.937298
AT1G03970	1472.73	0.302511	0.24715	1.224	0.220952	0.504755
AT1G03980	5.514	1.79689	2.04369	0.879237	0.379273	0.668742
AT1G03990	83.1175	-0.463701	0.649597	-0.713829	0.475333	0.746034
AT1G04000	631.534	-0.0545598	0.342588	-0.159258	0.873466	0.954341
AT1G04010	70.021	-0.316548	0.712826	-0.444075	0.656988	0.857519
AT1G04020	29.93	0.814197	0.990731	0.821814	0.411182	0.694819
AT1G04030	268.193	0.635492	0.377872	1.68177	0.0926142	0.311564
AT1G04040	645.421	-0.18765	0.48431	-0.387459	0.698416	0.880343
AT1G04050	135.213	0.467604	0.505172	0.925634	0.354636	0.647923
AT1G04070	394.383	-0.640534	0.319776	-2.00307	0.0451696	0.203642
AT1G04080	1815.51	-0.308778	0.254681	-1.21241	0.225355	0.510834
AT1G04090	40.1591	0.715028	0.819244	0.87279	0.382778	0.671651
AT1G04100	223.185	-0.267227	0.40188	-0.664942	0.506088	0.765749
AT1G04120	6191.35	-0.131829	0.208421	-0.632512	0.527052	0.780098
AT1G04130	148.811	0.465325	0.467588	0.995162	0.319657	0.614907
AT1G04140	1854.26	-0.527265	0.230346	-2.28901	0.0220787	0.130504
AT1G04160	67.6811	0.546402	0.612702	0.891792	0.372505	0.662718
AT1G04170	1079.13	-0.290709	0.229432	-1.26708	0.205126	0.483939
AT1G04190	321.309	-0.142009	0.391666	-0.362578	0.71692	0.887881
AT1G04200	331.334	0.370784	0.323241	1.14708	0.251347	0.542605
AT1G04210	834.733	-0.053912	0.242895	-0.221956	0.824348	0.935555
AT1G04220	6301.33	0.175475	0.227613	0.770937	0.440744	0.719209
AT1G04230	235.541	0.274394	0.489461	0.560605	0.575067	0.809765
AT1G04240	37.0337	3.3838	1.02409	3.3042	0.000952488	0.014567
AT1G04250	889.664	2.72008	1.08672	2.50302	0.0123138	0.0895332
AT1G04260	1173.78	-0.692238	0.265239	-2.60986	0.00905782	0.0737146
AT1G04270	2450.89	0.172241	0.240743	0.715454	0.474329	0.745039
AT1G04280	167.772	0.739887	0.534371	1.3846	0.166176	0.433403
AT1G04290	181.407	0.327123	0.586733	0.557532	0.577164	0.811501
AT1G04300	1602.03	-0.014814	0.235244	-0.062973	0.949788	0.982114
AT1G04310	1410.42	-0.426105	0.227442	-1.87347	0.0610038	0.243687
AT1G04330	24.9895	0.316287	1.06476	0.297049	0.766429	0.911017
AT1G04340	272.092	-0.9071	0.392418	-2.31157	0.0208015	0.126173
AT1G04350	688.56	-0.416992	0.318565	-1.30897	0.190545	0.466022
AT1G04360	28.4486	-0.877977	1.13347	-0.77459	0.438582	0.717874
AT1G04380	764.885	0.478867	0.361255	1.32557	0.184983	0.460409
AT1G04390	249.701	-1.22124	0.40994	-2.97907	0.00289127	0.0333213
AT1G04400	5575.01	-0.327032	0.193814	-1.68735	0.0915353	0.309595
AT1G04410	10175.6	-0.29611	0.207725	-1.42549	0.154016	0.415838
AT1G04420	123.82	-0.208527	0.594844	-0.350558	0.72592	0.892064
AT1G04430	492.785	1.70274	0.387554	4.39355	1.12e-05	0.000490976
AT1G04440	2162.75	-0.29798	0.210643	-1.41462	0.157181	0.419646
AT1G04445	27.2808	0.143188	0.898016	0.159449	0.873315	0.954341
AT1G04470	140.3	3.38026	0.924101	3.65788	0.000254305	0.00545154
AT1G04480	857.794	-0.98604	0.328101	-3.00529	0.00265329	0.0313196
AT1G04490	12.9451	-1.53702	1.95032	-0.788087	0.430646	0.710735
AT1G04500	88.8404	-0.618511	0.70797	-0.873641	0.382314	0.671189
AT1G04510	882.87	0.0258456	0.265438	0.0973694	0.922433	0.970735
AT1G04520	18.7378	3.12167	1.52084	2.0526	0.0401112	0.188465
AT1G04530	839.41	0.687087	0.261634	2.62614	0.00863595	0.071528
AT1G04540	81.2282	2.6482	0.651523	4.06463	4.81e-05	0.00153205
AT1G04550	364.518	0.395175	0.341104	1.15852	0.246652	0.536865
AT1G04555	340.544	0.0425713	0.355375	0.119793	0.904647	0.965839
AT1G04570	125.558	0.356403	0.526496	0.676935	0.498447	0.76084
AT1G04580	8282.48	0.520639	0.212535	2.44967	0.0142988	0.0984489
AT1G04590	197.204	1.0777	0.423281	2.54605	0.0108949	0.0830752
AT1G04600	11.5233	1.87182	2.1398	0.874762	0.381703	0.670997
AT1G04610	7.91529	4.52071	2.18287	2.07099	0.0383595	0.183498
AT1G04620	174.981	0.268094	0.545514	0.491453	0.623106	0.839313
AT1G04630	658.65	-0.608265	0.341679	-1.78022	0.0750399	0.275025
AT1G04635	22.2582	-0.361579	1.20279	-0.300618	0.763706	0.909947
AT1G04640	27.674	1.06551	0.948428	1.12345	0.261245	0.554031
AT1G04645	55.8858	-0.670385	0.773847	-0.866303	0.386324	0.674103
AT1G04650	22.7932	0.115444	1.04624	0.110342	0.912138	0.968033
AT1G04680	909.626	2.63492	0.482922	5.4562	4.86e-08	5.88e-06
AT1G04690	2804.93	-0.320646	0.208564	-1.5374	0.124195	0.366094
AT1G04700	47.1556	0.552688	0.881324	0.627111	0.530587	0.782646
AT1G04710	456.597	-0.0484526	0.31261	-0.154994	0.876826	0.955547
AT1G04730	19.3931	-1.01107	1.15903	-0.872345	0.38302	0.6719
AT1G04750	2831.36	0.0328428	0.201183	0.163249	0.870323	0.953532
AT1G04760	12.942	3.16393	1.57636	2.00711	0.0447378	0.202526
AT1G04770	1610.59	-0.565568	0.217603	-2.59909	0.00934723	0.0754278
AT1G04780	1710.79	0.282736	0.302231	0.935496	0.349533	0.643755
AT1G04790	353.028	-0.131028	0.428562	-0.30574	0.759803	0.907469
AT1G04800	25.5848	-2.99131	1.27977	-2.33739	0.0194192	0.120296
AT1G04810	736.009	-0.242813	0.31818	-0.76313	0.445386	0.722592
AT1G04820	4218.05	0.506634	0.3356	1.50964	0.131135	0.37801
AT1G04830	256.383	-0.253739	0.373794	-0.678821	0.497251	0.760154
AT1G04840	13.3714	3.653	2.12546	1.71868	0.0856718	0.297756
AT1G04850	1872.92	0.951561	0.289552	3.28633	0.00101504	0.0153803
AT1G04860	510.502	0.150244	0.283317	0.530302	0.595902	0.821838
AT1G04870	479.875	0.039261	0.355495	0.11044	0.91206	0.968033
AT1G04880	7.06015	2.66098	2.51508	1.05801	0.290051	0.584499
AT1G04890	3.21681	4.7037	3.62107	1.29898	0.193951	NA
AT1G04900	64.8435	1.61723	0.906718	1.78361	0.0744876	0.273598
AT1G04910	402.318	0.594313	0.331971	1.79026	0.0734128	0.271488
AT1G04920	29.3618	-0.911862	1.1807	-0.772307	0.439932	0.718676
AT1G04930	179.382	-0.525078	0.533196	-0.984774	0.324735	0.619685
AT1G04945	139.244	-0.406954	0.504458	-0.806716	0.41983	0.702587
AT1G04940	374.505	-0.117482	0.336161	-0.349481	0.726729	0.892302
AT1G04950	310.611	0.371046	0.347752	1.06698	0.285979	0.579959
AT1G04960	1265.24	-0.436629	0.265104	-1.64701	0.0995555	0.324003
AT1G04970	1313.27	-0.452035	0.256446	-1.76269	0.0779526	0.28189
AT1G04980	135.299	0.449595	0.454536	0.98913	0.3226	0.617422
AT1G04985	449.467	-0.506772	0.425765	-1.19026	0.233944	0.522037
AT1G04990	626.144	-0.250094	0.370345	-0.6753	0.499485	0.761447
AT1G05000	1338.91	-0.518767	0.31855	-1.62853	0.103413	0.331091
AT1G05010	1789.19	-0.19194	0.217405	-0.882869	0.377307	0.667418
AT1G05020	3.32936	2.11362	3.08653	0.68479	0.493476	NA
AT1G05030	159.484	-0.399916	0.458665	-0.871912	0.383256	0.67208
AT1G05055	248.48	-0.257484	0.459182	-0.560746	0.574971	0.809751
AT1G05060	328.058	0.187598	0.423723	0.442738	0.657955	0.857865
AT1G05070	427.987	-0.0656715	0.293317	-0.223893	0.822841	0.935009
AT1G05080	2.84152	4.52548	4.42261	1.02326	0.306185	NA
AT1G05090	92.1323	-0.801646	0.900805	-0.889922	0.373508	0.663555
AT1G05100	1443.88	-1.12169	0.330948	-3.38932	0.000700654	0.0116256
AT1G05120	711.397	0.165734	0.290122	0.571258	0.567825	0.805665
AT1G05140	719.386	-0.113683	0.314282	-0.361722	0.71756	0.888026
AT1G05150	675.175	0.0411173	0.349948	0.117495	0.906468	0.966492
AT1G05160	133.553	1.29187	0.639074	2.02147	0.0432307	0.197833
AT1G05170	268.088	0.127002	0.361285	0.35153	0.725191	0.891699
AT1G05180	447.239	0.564803	0.335432	1.68381	0.0922182	0.310857
AT1G05190	1493.91	0.258752	0.347163	0.745333	0.45607	0.730418
AT1G05200	349.182	-0.330579	0.401771	-0.822806	0.410618	0.694347
AT1G05205	156.919	0.0481681	0.51855	0.0928901	0.925991	0.972302
AT1G05210	31.8626	0.359106	1.24272	0.288967	0.772607	0.913888
AT1G05230	240.294	-0.433648	0.454343	-0.954449	0.339856	0.634515
AT1G05240	3.43875	-1.0992	3.5594	-0.308816	0.757462	NA
AT1G05260	36.5541	3.36116	0.932729	3.60357	0.000313871	0.00641709
AT1G05270	471.467	-0.1294	0.323308	-0.400238	0.688982	0.874604
AT1G05280	155.547	-2.14682	0.543797	-3.94784	7.89e-05	0.00220207
AT1G05291	5.53938	0.49367	1.81026	0.272706	0.785079	0.918962
AT1G05300	76.464	0.756915	0.696585	1.08661	0.27721	0.571118
AT1G05310	83.864	0.658321	0.752704	0.874607	0.381788	0.671039
AT1G05320	152.26	0.472292	0.562468	0.839678	0.401089	0.686794
AT1G05330	5.34315	0.399369	2.29866	0.17374	0.86207	0.95035
AT1G05340	11043.1	-1.31092	0.275444	-4.75929	1.94e-06	0.00012076
AT1G05350	452.757	-0.0723321	0.313968	-0.230381	0.817796	0.932764
AT1G05360	358.629	-0.578324	0.343547	-1.68339	0.0922994	0.31088
AT1G05370	58.0786	2.58358	0.731833	3.53029	0.000415112	0.00792224
AT1G05380	791.228	-0.744824	0.304099	-2.44928	0.0143142	0.0984556
AT1G05385	89.4309	-0.0937959	0.589696	-0.159058	0.873623	0.954341
AT1G05400	22.6433	0.607343	1.13364	0.535748	0.592133	0.819693
AT1G05410	207.145	0.378168	0.398818	0.948223	0.343016	0.637693
AT1G05420	4.38114	-0.332793	2.40192	-0.138553	0.889803	0.961288
AT1G05430	307.535	0.159428	0.398962	0.399607	0.689446	0.874803
AT1G05440	7.27131	1.04175	2.21749	0.469787	0.638507	0.846451
AT1G05450	14.6823	1.73959	1.60707	1.08246	0.27905	0.573268
AT1G05460	211.816	1.68116	0.528695	3.17982	0.00147367	0.0203906
AT1G05470	50.7291	2.86657	0.934184	3.06853	0.00215117	0.0267922
AT1G05490	2369.5	-0.129964	0.25156	-0.51663	0.605415	0.828372
AT1G05500	836.922	0.58029	0.261679	2.21756	0.0265846	0.146712
AT1G05520	986.357	-0.254249	0.297767	-0.853855	0.393185	0.679925
AT1G05540	22.2897	0.363742	1.11197	0.327116	0.74358	0.900523
AT1G05550	22.7659	1.64401	1.23176	1.33468	0.18198	0.45584
AT1G05560	1123.42	-1.31444	0.272922	-4.81619	1.46e-06	9.48e-05
AT1G05570	2665.13	-0.201126	0.284849	-0.706081	0.480138	0.74924
AT1G05575	130.923	-1.37036	0.797969	-1.71731	0.085922	0.297902
AT1G05580	202.784	3.1668	0.826826	3.83007	0.000128107	0.00323931
AT1G05590	491.711	0.419838	0.38826	1.08133	0.279549	0.57341
AT1G05600	143.832	-0.0388328	0.430923	-0.0901152	0.928196	0.972677
AT1G05610	9.97685	-0.529418	1.4552	-0.363811	0.715999	0.8876
AT1G05620	462.56	-0.362899	0.372584	-0.974007	0.330053	0.625279
AT1G05630	168.594	0.132848	0.432818	0.306938	0.758891	0.906854
AT1G05640	51.8205	2.39683	1.00929	2.37476	0.0175604	0.112819
AT1G05670	102.749	0.734434	0.64648	1.13605	0.255935	0.547674
AT1G05680	63.3938	0.546233	0.612043	0.892474	0.372139	0.662243
AT1G05690	81.8591	0.0150561	0.746503	0.0201688	0.983909	0.993735
AT1G05710	463.775	-0.0632483	0.368902	-0.17145	0.86387	0.950894
AT1G05720	515.052	-0.519356	0.290858	-1.7856	0.0741643	0.272987
AT1G05730	4.42039	0.603849	2.39998	0.251606	0.801346	0.925484
AT1G05750	96.598	-1.29102	0.550051	-2.34709	0.0189208	0.118267
AT1G05760	262.24	-1.31126	0.676307	-1.93885	0.0525191	0.222667
AT1G05770	67.1309	-0.782551	0.876467	-0.892847	0.371939	0.662064
AT1G05780	59.9373	-1.74368	0.751307	-2.32086	0.0202942	0.123991
AT1G05785	212.181	-0.37145	0.403533	-0.920494	0.357315	0.650096
AT1G05790	580.851	-0.00948107	0.3536	-0.026813	0.978609	0.991316
AT1G05805	319.883	0.51343	0.396917	1.29355	0.195822	0.472312
AT1G05810	83.0939	0.607747	0.732965	0.829162	0.407013	0.691101
AT1G05820	46.1252	0.771859	0.828183	0.931991	0.351341	0.644778
AT1G05830	553.13	-0.121725	0.287147	-0.423911	0.671631	0.866658
AT1G05835	2.09542	-0.788178	3.62724	-0.217294	0.827979	NA
AT1G05840	751.607	-0.521228	0.291442	-1.78844	0.0737049	0.272167
AT1G05850	8624.84	-0.284032	0.23425	-1.21252	0.225314	0.510834
AT1G05860	78.3812	-0.0836994	0.682058	-0.122716	0.902332	0.964841
AT1G05870	293.52	0.10026	0.361854	0.277072	0.781725	0.917958
AT1G05890	1321.87	-0.0933186	0.23722	-0.393384	0.694036	0.87765
AT1G05894	2.05182	-2.21195	3.62142	-0.610796	0.541335	NA
AT1G05900	104.514	0.520573	0.699942	0.743738	0.457035	0.731023
AT1G05910	722.473	-0.114546	0.339521	-0.337376	0.735833	0.89622
AT1G05940	1003.49	-0.882417	0.266188	-3.31502	0.000916376	0.0141633
AT1G05950	237.006	0.425556	0.385487	1.10394	0.269618	0.562636
AT1G05960	407.775	0.105443	0.328025	0.321448	0.747871	0.90227
AT1G05970	97.5812	-0.64439	0.649584	-0.992004	0.321196	0.615858
AT1G06000	9.7959	-2.74629	2.26866	-1.21053	0.226074	0.512072
AT1G06010	48.4908	-0.134544	0.783984	-0.171616	0.863739	0.95086
AT1G06020	41.056	-0.686875	0.885072	-0.776067	0.43771	0.716946
AT1G06030	28.0493	-2.35385	0.92645	-2.54072	0.0110624	0.0838994
AT1G06040	3720.99	-0.408274	0.381842	-1.06922	0.284969	0.579074
AT1G06050	709.279	-0.423607	0.354994	-1.19328	0.232759	0.52039
AT1G06060	317.478	-0.123261	0.38077	-0.323714	0.746155	0.901574
AT1G06070	679.769	0.219038	0.310446	0.70556	0.480462	0.749571
AT1G06080	4.21632	5.09433	3.32067	1.53413	0.124998	0.36749
AT1G06090	5.23162	-2.32374	2.55849	-0.908247	0.363748	0.655739
AT1G06110	1006.61	-0.213257	0.235478	-0.905631	0.365131	0.656817
AT1G06130	209.05	0.326727	0.533755	0.612128	0.540453	0.788075
AT1G06140	11.3299	0.542079	2.1928	0.247209	0.804746	0.926817
AT1G06150	254.469	1.32111	0.378054	3.49449	0.000474961	0.00869261
AT1G06149	130.647	2.38968	0.522466	4.57384	4.79e-06	0.000251573
AT1G06148	2.33396	4.24488	3.40637	1.24616	0.212706	NA
AT1G06160	11.8755	1.53623	1.82975	0.839584	0.401142	0.686826
AT1G06170	4.85415	-0.891005	2.26917	-0.392658	0.694572	0.878089
AT1G06180	134.332	0.145107	0.591462	0.245336	0.806196	0.927671
AT1G06190	129.388	0.11204	0.573233	0.195453	0.845038	0.943896
AT1G06200	549.018	0.226154	0.347911	0.650032	0.515671	0.772432
AT1G06210	409.716	0.429538	0.332532	1.29172	0.196454	0.473323
AT1G06220	1273.99	-0.0483412	0.275835	-0.175254	0.86088	0.950029
AT1G06230	2063.85	0.497122	0.277962	1.78845	0.0737026	0.272167
AT1G06240	133.339	-0.296429	0.450628	-0.657814	0.510658	0.769185
AT1G06250	11.8866	0.644617	1.69079	0.381251	0.703017	0.882784
AT1G06260	11.9028	-0.607721	1.76039	-0.34522	0.729929	0.893979
AT1G06270	141.519	-0.252955	0.456095	-0.554611	0.579161	0.812316
AT1G06290	1771.3	0.29883	0.220254	1.35675	0.17486	0.445126
AT1G06380	59.2116	-0.759324	0.710207	-1.06916	0.284998	0.579074
AT1G06390	357.82	0.048876	0.392907	0.124396	0.901002	0.964802
AT1G06400	3836.38	-0.140956	0.230215	-0.612281	0.540352	0.788074
AT1G06410	1811.02	0.0109962	0.231564	0.0474868	0.962125	0.986144
AT1G06420	55.8197	1.20211	0.993471	1.21001	0.226276	0.512077
AT1G06430	1671.18	-0.0743899	0.286847	-0.259336	0.795376	0.922833
AT1G06440	63.6565	-0.270081	0.651051	-0.414839	0.67826	0.869899
AT1G06450	378.579	-0.0218356	0.324877	-0.0672117	0.946413	0.981086
AT1G06460	237.23	-0.497612	0.523371	-0.950783	0.341715	0.636424
AT1G06470	326.121	-0.0873147	0.367796	-0.2374	0.812347	0.930323
AT1G06475	19.5077	1.69212	1.14017	1.48409	0.137785	0.389018
AT1G06490	94.9211	-0.504907	0.724317	-0.69708	0.485753	0.752639
AT1G06500	429.614	-0.549117	0.312463	-1.75738	0.0788523	0.283738
AT1G06515	89.3708	0.0594748	0.881425	0.0674757	0.946203	0.981043
AT1G06510	28.2235	0.0386971	1.28376	0.0301435	0.975953	0.990237
AT1G06520	1980	0.661494	0.214402	3.0853	0.00203348	0.0258067
AT1G06530	716.469	0.366002	0.329481	1.11084	0.266635	0.560021
AT1G06540	3.17622	4.69289	3.14981	1.4899	0.136251	NA
AT1G06550	396.694	-0.0769412	0.417174	-0.184434	0.853673	0.946974
AT1G06560	75.6659	-0.391747	0.655336	-0.59778	0.549986	0.792865
AT1G06570	6829.06	-0.340481	0.222152	-1.53265	0.125363	0.368401
AT1G06580	42.4848	-0.340892	0.901081	-0.378315	0.705197	0.883456
AT1G06590	189.438	-0.0246623	0.413652	-0.0596209	0.952458	0.982975
AT1G06620	6.91912	0.700267	1.92073	0.364583	0.715423	0.887226
AT1G06630	191.76	-0.67226	0.486628	-1.38147	0.167136	0.434549
AT1G06640	733.223	-0.158734	0.354639	-0.447594	0.654446	0.855759
AT1G06645	11.1504	1.24616	2.1994	0.56659	0.570993	0.807823
AT1G06650	783.677	-0.127138	0.265973	-0.478013	0.632641	0.843797
AT1G06660	73.4142	0.89465	0.613926	1.45726	0.145044	0.400778
AT1G06670	650.826	-0.33487	0.273379	-1.22493	0.220601	0.504616
AT1G06680	7703.14	0.484471	0.267185	1.81325	0.069794	0.263245
AT1G06690	179.39	-0.265594	0.564609	-0.470404	0.638066	0.846301
AT1G06700	1101.72	-0.0298832	0.264009	-0.11319	0.90988	0.967696
AT1G06710	22.6325	1.44664	1.04181	1.38858	0.164961	0.431576
AT1G06720	123.586	-0.288139	0.498619	-0.577875	0.563349	0.802142
AT1G06730	233.278	0.387501	0.539113	0.718776	0.472279	0.743476
AT1G06750	14.6776	-1.52114	1.4034	-1.0839	0.27841	0.572591
AT1G06760	19547.4	-0.671078	0.19428	-3.45419	0.000551957	0.0097981
AT1G06770	155.953	0.12088	0.535667	0.225662	0.821464	0.934209
AT1G06780	559.435	0.00787852	0.278062	0.0283337	0.977396	0.99097
AT1G06790	163.798	-0.151526	0.554696	-0.27317	0.784722	0.918759
AT1G06800	323.505	0.73759	0.368712	2.00045	0.0454517	0.204549
AT1G06820	333.726	0.202119	0.311015	0.649871	0.515776	0.772432
AT1G06840	280.81	0.160486	0.362862	0.442277	0.658289	0.857877
AT1G06850	36.2336	0.372452	0.917095	0.406122	0.684653	0.872748
AT1G06870	789.964	-0.860178	0.277219	-3.10289	0.00191643	0.0246642
AT1G06890	1074	-0.441768	0.228689	-1.93174	0.0533916	0.225104
AT1G06900	264.151	0.410195	0.414767	0.988977	0.322674	0.617454
AT1G06910	71.5026	0.626109	0.806101	0.776713	0.437328	0.716754
AT1G06950	836.952	0.492984	0.299132	1.64805	0.0993426	0.323572
AT1G06960	159.178	0.880656	0.48699	1.80836	0.0705498	0.2651
AT1G06970	2.31864	4.23559	4.00497	1.05758	0.290245	NA
AT1G07000	154.387	-1.05459	0.532704	-1.97969	0.0477385	0.210509
AT1G07010	231.443	0.595566	0.639619	0.931126	0.351788	0.645304
AT1G07020	313.124	-0.290887	0.366528	-0.793628	0.427412	0.708191
AT1G07030	666.719	-0.621061	0.255659	-2.42925	0.0151299	0.102202
AT1G07040	6557.13	-0.644127	0.217254	-2.96486	0.00302822	0.0344267
AT1G07070	75.464	-0.462039	0.55123	-0.838195	0.401921	0.687457
AT1G07080	2723.79	-0.673121	0.23609	-2.85112	0.00435651	0.0445118
AT1G07090	767.316	-0.290224	0.302529	-0.959325	0.337395	0.632422
AT1G07110	731.842	0.318654	0.309061	1.03104	0.302523	0.596957
AT1G07120	25.4111	1.24688	1.15383	1.08065	0.279854	0.573622
AT1G07130	357.746	-0.689027	0.435265	-1.58301	0.11342	0.347761
AT1G07135	2569.55	-0.92903	0.391831	-2.371	0.0177401	0.113756
AT1G07140	1731.44	0.325946	0.296764	1.09833	0.272059	0.565095
AT1G07150	600.805	-0.465987	0.29699	-1.56903	0.116641	0.353427
AT1G07170	251.284	-0.776858	0.402959	-1.92788	0.0538698	0.226469
AT1G07180	19.295	0.319259	1.68207	0.189801	0.849465	0.946064
AT1G07200	1321.78	-0.177544	0.2602	-0.682338	0.495026	0.759066
AT1G07210	255.778	-0.222494	0.367036	-0.60619	0.544389	0.790275
AT1G07220	230.892	-0.158859	0.39021	-0.407111	0.683927	0.87253
AT1G07230	2383.78	-0.400739	0.280746	-1.42741	0.153463	0.414851
AT1G07240	168.7	-0.534631	0.530343	-1.00809	0.313414	0.608414
AT1G07250	3080.82	-0.906913	0.21497	-4.21878	2.46e-05	0.000923477
AT1G07260	7.44545	0.861126	1.88872	0.45593	0.64844	0.852263
AT1G07270	2.57556	2.80455	3.58541	0.782211	0.43409	NA
AT1G07280	812.226	-0.205289	0.310272	-0.661642	0.5082	0.767283
AT1G07290	25.3565	-0.0839701	0.931369	-0.0901577	0.928162	0.972677
AT1G07300	13.5538	0.441354	1.34584	0.327938	0.742958	0.900311
AT1G07310	4426.47	-0.857803	0.22664	-3.78486	0.000153793	0.00370227
AT1G07320	1019.29	0.969454	0.388021	2.49845	0.0124736	0.0902125
AT1G07340	5.2351	-0.627118	3.14625	-0.199322	0.842011	0.94313
AT1G07350	1226.37	-0.582924	0.289613	-2.01277	0.0441392	0.200721
AT1G07360	1579.26	-0.000559494	0.241985	-0.0023121	0.998155	0.999335
AT1G07370	102.721	0.567537	0.529234	1.07237	0.283552	0.578309
AT1G07380	396.082	0.310367	0.333837	0.929696	0.352529	0.646013
AT1G07390	93.7759	1.61762	0.547243	2.95595	0.00311708	0.0351978
AT1G07400	75.6268	-0.30589	0.824789	-0.37087	0.710734	0.885612
AT1G07410	31.5474	-1.5461	1.02039	-1.5152	0.129722	0.37571
AT1G07420	321.77	-0.535517	0.47761	-1.12124	0.262184	0.555364
AT1G07430	2641.19	0.0473806	0.270759	0.174992	0.861086	0.950075
AT1G07440	242.785	-1.292	0.543157	-2.37868	0.0173747	0.111948
AT1G07450	2.02965	4.0389	4.42869	0.911984	0.361777	NA
AT1G07470	506.562	0.0428137	0.315231	0.135817	0.891966	0.962175
AT1G07473	18.4902	1.48745	1.36581	1.08906	0.276128	0.569778
AT1G07480	596.601	-0.324583	0.272424	-1.19146	0.233472	0.521462
AT1G07485	5.90126	5.57906	2.6091	2.13831	0.0324916	0.166327
AT1G07490	14.0641	-0.707577	1.67313	-0.422905	0.672364	0.866992
AT1G07510	1609.94	0.26109	0.26247	0.994744	0.319861	0.614943
AT1G07520	282.681	0.499189	0.344063	1.45086	0.146818	0.403872
AT1G07530	1997.8	-0.235574	0.23742	-0.992222	0.321089	0.615823
AT1G07540	2.83545	4.52841	3.72762	1.21483	0.224432	NA
AT1G07570	307.528	1.66145	0.34474	4.81942	1.44e-06	9.35e-05
AT1G07590	5854.44	-0.557749	0.407825	-1.36762	0.171431	0.440407
AT1G07610	75.9782	0.00354617	0.771561	0.00459611	0.996333	0.99877
AT1G07615	89.4174	0.778531	0.673531	1.15589	0.247725	0.538372
AT1G07620	2.40398	-2.90673	3.95539	-0.734877	0.462415	NA
AT1G07630	1031.82	0.441151	0.237402	1.85824	0.0631348	0.247764
AT1G07640	3539.81	0.686691	0.247149	2.77845	0.00546185	0.0519704
AT1G07650	4037.5	0.323943	0.199618	1.62281	0.104629	0.333065
AT1G07645	6.70691	1.42087	2.24256	0.633596	0.526344	0.7796
AT1G07660	442.543	-0.232232	0.320175	-0.725328	0.468251	0.740553
AT1G07670	5072.25	-0.26054	0.208599	-1.249	0.211665	0.492797
AT1G07700	379.86	-0.15797	0.343395	-0.460023	0.6455	0.850262
AT1G07705	414.617	0.242852	0.413071	0.587918	0.556587	0.797275
AT1G07710	56.1766	0.285792	0.780557	0.366138	0.714262	0.886779
AT1G07720	18248.1	-0.468462	0.281439	-1.66452	0.096008	0.317612
AT1G07725	223.65	-0.498834	0.377757	-1.32051	0.186664	0.462045
AT1G07740	80.2695	-1.06646	0.798787	-1.3351	0.181842	0.45584
AT1G07730	7.96343	6.01273	2.89671	2.07571	0.037921	0.182242
AT1G07745	72.7523	-0.447136	0.655302	-0.682336	0.495026	0.759066
AT1G07750	3937.82	-0.4888	0.239266	-2.04292	0.0410605	0.191403
AT1G07770	780.592	-0.092237	0.346549	-0.266159	0.790117	0.920586
AT1G07780	81.0359	1.01886	0.621516	1.63931	0.101149	0.326605
AT1G07790	615.54	-0.0309299	0.329687	-0.0938159	0.925255	0.972126
AT1G07795	7.2032	-1.09186	2.30525	-0.473642	0.635755	0.845548
AT1G07810	5257.34	-0.372225	0.226592	-1.64271	0.100444	0.325427
AT1G07820	1178.1	-0.105432	0.256165	-0.41158	0.680647	0.870886
AT1G07830	74.8976	-0.727945	0.588904	-1.2361	0.216421	0.499206
AT1G07840	298.335	0.635552	0.420556	1.51122	0.130733	0.377442
AT1G07850	3.04773	3.08662	3.35312	0.920521	0.357301	NA
AT1G07870	400.708	1.18802	0.331131	3.58776	0.000333531	0.00668962
AT1G07880	7.44029	1.07952	1.7997	0.599834	0.548617	0.792485
AT1G07890	9463.5	-0.376633	0.195875	-1.92282	0.0545027	0.227684
AT1G07900	260.578	0.0574873	0.544445	0.105589	0.915909	0.968915
AT1G07910	217.712	-0.209894	0.368107	-0.570198	0.568543	0.806233
AT1G07920	12114.1	-0.208765	0.267292	-0.781038	0.43478	0.714787
AT1G07930	7512.61	-0.236746	0.258695	-0.915154	0.360111	0.652169
AT1G07940	8660.17	-0.340308	0.225248	-1.51082	0.130835	0.377627
AT1G07950	131.06	-0.586004	0.454096	-1.29049	0.196882	0.473844
AT1G07960	330.472	-0.109296	0.3668	-0.297972	0.765725	0.91048
AT1G07970	162.949	-0.28699	0.477625	-0.600869	0.547927	0.792218
AT1G07980	337.954	-0.220555	0.331329	-0.665666	0.505625	0.765514
AT1G07985	20.3612	-0.49655	1.53722	-0.323018	0.746681	0.901939
AT1G07990	1520.93	0.244887	0.246721	0.992567	0.320921	0.615684
AT1G08000	222.776	-0.331344	0.420172	-0.78859	0.430352	0.710634
AT1G08010	428.512	-0.0551242	0.319052	-0.172775	0.862828	0.950717
AT1G08030	465.067	0.256112	0.427783	0.598697	0.549375	0.792676
AT1G08040	948.915	0.528102	0.280265	1.8843	0.0595248	0.240131
AT1G08050	223.235	-0.551253	0.597477	-0.922634	0.356198	0.649476
AT1G08060	680.756	-0.170668	0.34032	-0.501493	0.616024	0.835727
AT1G08070	16.6089	2.93286	1.32154	2.21927	0.0264685	0.146273
AT1G08090	533.929	1.99518	0.504672	3.95342	7.7e-05	0.00216335
AT1G08110	785.878	0.0553099	0.259249	0.213346	0.831057	0.93887
AT1G08120	2.87351	4.54931	4.42017	1.02922	0.303379	NA
AT1G08125	226.703	0.0981656	0.353467	0.277722	0.781226	0.917749
AT1G08130	359.018	1.27421	0.405465	3.1426	0.00167454	0.0223684
AT1G08140	36.5724	4.40225	1.36875	3.21627	0.00129871	0.0185599
AT1G08150	42.3624	1.24064	1.15993	1.06958	0.284808	0.579074
AT1G08160	449.332	-0.623024	0.393692	-1.58252	0.113532	0.347996
AT1G08180	155.189	-1.10211	0.457592	-2.40849	0.0160186	0.105861
AT1G08190	1069.43	0.127163	0.251365	0.50589	0.612934	0.834014
AT1G08200	3284.09	-0.1299	0.294258	-0.441451	0.658887	0.858256
AT1G08210	266.618	-0.0706949	0.419451	-0.168541	0.866157	0.951715
AT1G08220	63.6759	0.579713	0.67675	0.856613	0.391659	0.678869
AT1G08230	740.359	-0.472926	0.339279	-1.39392	0.163343	0.42891
AT1G08250	244.282	-0.43836	0.411941	-1.06413	0.287268	0.581283
AT1G08260	121.176	0.816622	0.527243	1.54885	0.121417	0.361523
AT1G08270	21.4834	-0.152481	1.27109	-0.11996	0.904514	0.965815
AT1G08280	192.599	1.07786	0.408877	2.63616	0.00838507	0.0699697
AT1G08290	50.9095	0.124977	0.982739	0.127173	0.898804	0.964215
AT1G08300	11.8663	6.59399	2.11648	3.11555	0.00183601	0.0239828
AT1G08310	28.7813	0.470135	1.14513	0.410552	0.681401	0.871202
AT1G08315	2958.18	-1.05246	0.247301	-4.25577	2.08e-05	0.000810608
AT1G08320	476.621	-0.300418	0.277442	-1.08281	0.278891	0.57311
AT1G08340	112.922	0.197319	0.547209	0.360591	0.718405	0.888494
AT1G08350	204.378	-0.360682	0.430653	-0.837524	0.402298	0.687868
AT1G08360	2600.61	0.0465266	0.221072	0.210459	0.833309	0.939337
AT1G08370	1337.47	-0.495589	0.247435	-2.00291	0.0451873	0.203642
AT1G08380	2831.71	0.29982	0.273122	1.09775	0.272312	0.565436
AT1G08390	18.7521	-0.714644	1.09768	-0.651047	0.515016	0.771929
AT1G08400	138.653	0.326074	0.562016	0.580186	0.561789	0.800805
AT1G08410	114.751	0.354832	0.52757	0.672579	0.501215	0.762572
AT1G08420	1042.89	-0.493735	0.268709	-1.83743	0.0661461	0.254799
AT1G08430	3.85068	2.34061	2.69097	0.869803	0.384408	0.672572
AT1G08450	433.368	0.408484	0.333531	1.22473	0.220678	0.504616
AT1G08460	663.162	-0.657835	0.320383	-2.05327	0.0400461	0.188292
AT1G08465	10.942	3.97589	1.78334	2.22946	0.0257833	0.143752
AT1G08470	388.108	-0.211497	0.349537	-0.605077	0.545128	0.790675
AT1G08480	1512.77	0.0484314	0.303059	0.159809	0.873032	0.954341
AT1G08490	514.151	-0.726377	0.332573	-2.18412	0.0289537	0.154438
AT1G08500	7.30582	-4.73404	2.2373	-2.11597	0.0343477	0.171499
AT1G08510	2572.79	-0.103987	0.277678	-0.37449	0.70804	0.884617
AT1G08520	637.125	0.666889	0.380241	1.75386	0.0794549	0.284911
AT1G08530	58.8739	-0.0538122	0.689022	-0.0780993	0.937749	0.97704
AT1G08540	430.325	0.336787	0.338399	0.995236	0.319622	0.614907
AT1G08550	141.448	-0.117682	0.439943	-0.267494	0.789089	0.920222
AT1G08560	309.138	1.00495	0.374162	2.68586	0.00723432	0.0635917
AT1G08570	2487.27	-0.724653	0.22016	-3.29149	0.000996593	0.0151351
AT1G08580	143.264	0.389083	0.572205	0.679971	0.496523	0.759693
AT1G08590	220.781	-0.823451	0.400625	-2.05541	0.039839	0.187758
AT1G08600	968	-0.122903	0.285037	-0.431182	0.666336	0.862932
AT1G08610	42.0644	0.484986	0.865918	0.560083	0.575423	0.810038
AT1G08620	1096.14	-0.0992282	0.344796	-0.287789	0.773509	0.913888
AT1G08630	433.099	0.21608	0.304518	0.70958	0.477964	0.747748
AT1G08640	529.752	-0.221024	0.291583	-0.758013	0.448443	0.724977
AT1G08650	397.849	-0.0283587	0.415081	-0.0683208	0.94553	0.980751
AT1G08660	211.574	-0.000227539	0.381505	-0.000596423	0.999524	0.999823
AT1G08680	607.691	0.0774277	0.290527	0.266508	0.789848	0.920412
AT1G08700	1451.69	-0.44274	0.247546	-1.78852	0.0736928	0.272167
AT1G08710	196.064	-0.0928446	0.375763	-0.247083	0.804844	0.926817
AT1G08720	575.156	-0.450347	0.282192	-1.59589	0.110513	0.343675
AT1G08730	8.15315	-0.84857	2.52124	-0.336569	0.736442	0.896528
AT1G08750	238.714	-0.517035	0.37643	-1.37352	0.16959	0.437812
AT1G08760	707.906	0.366365	0.296847	1.23419	0.217132	0.500171
AT1G08770	843.044	-0.189865	0.308235	-0.615975	0.537911	0.786802
AT1G08780	268.252	-0.571435	0.421086	-1.35705	0.174765	0.445048
AT1G08800	828.214	0.46848	0.276545	1.69404	0.0902572	0.306966
AT1G08810	22.3943	2.04063	1.25481	1.62625	0.103897	0.331839
AT1G08820	1550.38	0.513619	0.225134	2.28139	0.0225252	0.131863
AT1G08830	5441.37	-0.180136	0.250465	-0.719207	0.472013	0.743263
AT1G08840	24.9882	0.994912	1.0377	0.958769	0.337675	0.632653
AT1G08845	42.5742	-0.296501	0.747472	-0.396672	0.691609	0.876061
AT1G08860	254.21	-0.879454	0.547027	-1.6077	0.107901	0.338754
AT1G08880	1319.99	-0.486829	0.23317	-2.08787	0.0368092	0.178712
AT1G08890	127.43	-0.160332	0.711855	-0.225232	0.821799	0.934432
AT1G08900	113.914	-0.496174	0.538168	-0.921969	0.356545	0.649662
AT1G08910	528.706	-0.34271	0.314559	-1.08949	0.275937	0.569778
AT1G08920	4894.96	-1.05434	0.308371	-3.41905	0.000628397	0.0108295
AT1G08930	219.946	-1.47383	0.530195	-2.77979	0.00543937	0.0518548
AT1G08940	285.619	-0.540369	0.423431	-1.27617	0.201896	0.480212
AT1G08960	204.233	0.13225	0.418683	0.315872	0.752099	0.90419
AT1G08970	2209.04	-0.196117	0.224306	-0.874327	0.38194	0.67112
AT1G08980	3376.02	-0.874825	0.210497	-4.156	3.24e-05	0.00113083
AT1G08990	249.797	-1.27009	0.527003	-2.41003	0.0159512	0.10552
AT1G09000	102.723	0.190469	0.505783	0.376582	0.706484	0.884012
AT1G09010	1690.82	0.279767	0.265837	1.0524	0.292615	0.58719
AT1G09020	1015.45	-0.698677	0.244618	-2.8562	0.00428747	0.0440622
AT1G09040	101.693	-0.791485	0.495708	-1.59668	0.110338	0.343401
AT1G09050	60.8008	0.678428	0.685808	0.989239	0.322546	0.617386
AT1G09060	1328.4	0.0507261	0.271294	0.186978	0.851678	0.946627
AT1G09070	23178.7	-1.1809	0.238945	-4.94212	7.73e-07	5.75e-05
AT1G09080	18.0556	-2.03398	1.97446	-1.03014	0.302942	0.597271
AT1G09100	446.243	0.404642	0.336147	1.20377	0.22868	0.515164
AT1G09130	2102.59	-0.420633	0.221081	-1.90262	0.0570904	0.233919
AT1G09140	2916.7	-0.7022	0.245157	-2.86429	0.00417949	0.0431644
AT1G09150	688.869	-0.312999	0.265822	-1.17748	0.239004	0.527597
AT1G09155	9.76158	-0.884948	1.61666	-0.547392	0.584109	0.814905
AT1G09160	347.493	0.295434	0.350795	0.842184	0.399685	0.685209
AT1G09176	20.5043	-1.72513	1.38473	-1.24582	0.212829	0.494441
AT1G09180	18.558	-1.46655	1.45987	-1.00458	0.315101	0.610056
AT1G09190	70.8163	0.00874354	0.836616	0.0104511	0.991661	0.996775
AT1G09195	101.577	0.274485	0.711131	0.385983	0.699509	0.880818
AT1G09200	449.914	0.143512	0.300891	0.476956	0.633394	0.844045
AT1G09210	3166.16	0.876001	0.268572	3.2617	0.00110748	0.0165192
AT1G09220	27.1855	0.677099	1.1252	0.601758	0.547335	0.792046
AT1G09230	468.82	-0.0969343	0.320325	-0.302612	0.762185	0.909017
AT1G09240	1462.6	0.105725	0.468926	0.225461	0.82162	0.934281
AT1G09250	185.028	0.784322	0.546778	1.43444	0.151445	0.411333
AT1G09270	1333.75	-0.0569674	0.257677	-0.221081	0.825029	0.935984
AT1G09280	353.631	0.235117	0.307112	0.765576	0.443928	0.721505
AT1G09290	94.2085	0.630249	0.541882	1.16307	0.244799	0.53457
AT1G09300	111.82	0.885529	0.606736	1.4595	0.144429	0.399627
AT1G09310	11571.3	-0.017875	0.358213	-0.0499005	0.960202	0.985345
AT1G09320	190.162	-0.081025	0.431604	-0.18773	0.851088	0.946477
AT1G09330	672.211	-0.595494	0.314683	-1.89236	0.0584426	0.237252
AT1G09340	364.266	0.782733	0.517214	1.51336	0.130187	0.376624
AT1G09350	2.24221	-5.06802	4.35184	-1.16457	0.244193	NA
AT1G09370	122.345	-1.26314	0.533887	-2.36593	0.0179851	0.114776
AT1G09380	4239.49	-0.928261	0.342993	-2.70636	0.00680256	0.0606191
AT1G09390	778.364	-0.0369567	0.29891	-0.123639	0.901601	0.964802
AT1G09400	18.3612	0.697695	1.4485	0.481667	0.630042	0.842729
AT1G09410	40.108	-1.79012	1.16082	-1.54211	0.123046	0.364151
AT1G09415	115.053	0.060321	0.524653	0.114973	0.908466	0.967046
AT1G09420	107.325	0.288592	0.491305	0.5874	0.556935	0.797323
AT1G09430	2328.96	0.0229418	0.220828	0.10389	0.917257	0.969154
AT1G09440	113.286	2.36511	0.743259	3.18208	0.00146223	0.0202603
AT1G09450	21.2922	3.31851	1.53641	2.15991	0.0307797	0.16051
AT1G09460	849.391	1.70271	0.374774	4.54329	5.54e-06	0.00028079
AT1G09470	30.4118	1.49921	1.01983	1.47006	0.141546	0.394775
AT1G09480	176.144	0.156964	0.555289	0.282671	0.777429	0.915923
AT1G09490	703.711	-0.118718	0.319463	-0.371616	0.710178	0.885612
AT1G09500	3342.73	0.196245	0.301382	0.65115	0.51495	0.771902
AT1G09510	70.0156	-0.172325	0.753728	-0.22863	0.819157	0.933542
AT1G09520	367.257	0.0912476	0.33122	0.275489	0.78294	0.918609
AT1G09530	146.599	-0.0905342	0.573408	-0.157888	0.874545	0.954564
AT1G09540	1700.99	-0.433067	0.238046	-1.81926	0.0688721	0.261331
AT1G09560	3530.38	-0.387189	0.246995	-1.5676	0.116976	0.353995
AT1G09570	3353.43	0.517862	0.202135	2.56196	0.0104083	0.0805693
AT1G09575	260.901	1.39214	0.405501	3.43314	0.000596636	0.0103835
AT1G09580	221.127	-0.288977	0.539735	-0.535405	0.59237	0.819768
AT1G09590	1613.85	-0.0764247	0.252267	-0.302951	0.761927	0.908942
AT1G09600	5.89253	1.52542	2.55436	0.597183	0.550385	0.792996
AT1G09610	53.0587	-0.813767	0.915878	-0.888511	0.374266	0.664439
AT1G09620	1913.68	0.185619	0.228176	0.813493	0.415935	0.698689
AT1G09630	202.972	0.673979	0.388599	1.73438	0.0828502	0.291668
AT1G09640	3536.17	-0.208699	0.260956	-0.799747	0.423857	0.705562
AT1G09645	690.016	-0.168647	0.290624	-0.580291	0.561718	0.800805
AT1G09650	3.80273	4.94538	3.41446	1.44837	0.147515	NA
AT1G09660	461.202	0.177508	0.30978	0.573015	0.566634	0.804624
AT1G09680	43.4229	0.506331	0.798856	0.63382	0.526198	0.779552
AT1G09690	2156.79	-0.0267839	0.245354	-0.109164	0.913072	0.968245
AT1G09700	206.841	1.06052	0.533581	1.98755	0.0468616	0.208146
AT1G09710	230.072	-0.102276	0.394474	-0.259272	0.795425	0.922833
AT1G09730	893.107	0.576087	0.285131	2.02043	0.0433392	0.198128
AT1G09740	366.413	-0.612991	0.375826	-1.63105	0.10288	0.32996
AT1G09750	25.2261	0.814951	1.15627	0.704812	0.480927	0.749918
AT1G09760	244.546	0.254992	0.366568	0.69562	0.486667	0.753414
AT1G09770	1771.41	0.558448	0.282894	1.97406	0.0483755	0.211863
AT1G09780	2028.71	0.294295	0.222142	1.32481	0.185235	0.460552
AT1G09790	969.568	-1.38497	0.370746	-3.73563	0.000187244	0.00429626
AT1G09794	35.2189	0.608903	0.859916	0.708096	0.478886	0.74823
AT1G09795	947.562	0.172384	0.301348	0.572042	0.567293	0.80537
AT1G09800	60.5385	-0.728586	1.06284	-0.685507	0.493024	0.758036
AT1G09810	129.784	1.56711	0.500163	3.13319	0.00172915	0.0228999
AT1G09815	457.525	-1.18532	0.349137	-3.39501	0.00068625	0.0114624
AT1G09820	79.9474	0.726839	0.657597	1.1053	0.269031	0.562437
AT1G09830	300.872	-0.277362	0.35467	-0.78203	0.434197	0.714119
AT1G09840	416.565	0.537944	0.319235	1.6851	0.0919685	0.31038
AT1G09850	414.512	0.128818	0.340506	0.378313	0.705198	0.883456
AT1G09870	434.46	-0.330834	0.406463	-0.813933	0.415683	0.6985
AT1G09880	39.9984	0.0606389	0.827161	0.0733097	0.94156	0.97888
AT1G09890	32.5486	2.15762	0.941003	2.29289	0.0218544	0.130083
AT1G09900	131.536	1.54256	0.560615	2.75155	0.00593134	0.0552079
AT1G09910	533.236	-0.631436	0.312141	-2.02292	0.0430818	0.197523
AT1G09920	755.755	-0.0882068	0.310112	-0.284435	0.776077	0.915201
AT1G09930	14.5429	-2.45693	1.38549	-1.77333	0.0761738	0.277709
AT1G09932	49.8748	-0.257562	1.03527	-0.248788	0.803525	0.926512
AT1G09940	380.366	0.0917704	0.353076	0.259917	0.794928	0.922833
AT1G09950	13.7351	-0.21439	1.68484	-0.127246	0.898746	0.964215
AT1G09960	537.848	-0.742061	0.31014	-2.39267	0.0167264	0.109244
AT1G09970	13112.4	-0.130773	0.210647	-0.620816	0.534721	0.784937
AT1G09980	625.607	-0.170172	0.417004	-0.408082	0.683213	0.872242
AT1G09995	6.27151	0.263067	1.75908	0.149548	0.881121	0.957697
AT1G10000	13.6883	-0.505646	1.35479	-0.373229	0.708978	0.884988
AT1G10010	62.8424	-0.0521311	0.742817	-0.0701802	0.94405	0.97993
AT1G10020	981.66	-0.341188	0.288676	-1.18191	0.237243	0.525934
AT1G10030	29.2672	-2.15491	0.898937	-2.39718	0.0165219	0.108155
AT1G10040	73.354	-0.00902253	0.556931	-0.0162005	0.987074	0.994926
AT1G10050	215.042	0.0331355	0.460322	0.0719833	0.942615	0.979167
AT1G10060	2130.19	-1.10443	0.357878	-3.08606	0.00202829	0.0257734
AT1G10070	1985.28	1.22499	0.236279	5.1845	2.17e-07	2.05e-05
AT1G10090	190.59	0.866875	0.422993	2.04938	0.0404248	0.189351
AT1G10095	90.2787	1.06681	0.724643	1.47218	0.140971	0.394025
AT1G10110	38.9793	-2.39455	0.901392	-2.6565	0.00789567	0.0673127
AT1G10120	149.553	0.985619	0.476419	2.06881	0.038564	0.183994
AT1G10130	519.391	-0.135101	0.310729	-0.434787	0.663717	0.861318
AT1G10140	2900.84	-0.276696	0.219404	-1.26113	0.207264	0.486979
AT1G10150	1206.3	-0.616659	0.252706	-2.44023	0.014678	0.100178
AT1G10170	1811.62	-0.45046	0.249014	-1.80898	0.0704545	0.264841
AT1G10180	377.768	0.333393	0.399049	0.835469	0.403454	0.688593
AT1G10190	8.2078	4.57612	2.57593	1.77649	0.075652	0.276509
AT1G10200	594.894	-0.139199	0.372691	-0.373498	0.708778	0.884955
AT1G10210	149.057	-0.427795	0.508983	-0.84049	0.400634	0.686424
AT1G10220	4.84612	-3.46211	3.12849	-1.10664	0.26845	0.561833
AT1G10230	246.211	-0.135745	0.36628	-0.370605	0.710932	0.885612
AT1G10240	193.073	0.295348	0.415925	0.7101	0.477642	0.747561
AT1G10270	210.782	0.661544	0.37901	1.74546	0.0809057	0.287759
AT1G10280	211.405	-0.122993	0.388675	-0.316441	0.751668	0.90413
AT1G10290	906.584	0.328757	0.246233	1.33515	0.181828	0.45584
AT1G10300	23.3988	5.10046	1.4003	3.64241	0.000270101	0.00571424
AT1G10310	334.209	-0.531422	0.340752	-1.55956	0.118865	0.356985
AT1G10320	248.524	0.158268	0.399191	0.396473	0.691756	0.876073
AT1G10330	26.6228	-0.505632	0.967802	-0.522454	0.601354	0.8257
AT1G10340	35.3321	-0.696988	0.864795	-0.805957	0.420267	0.702804
AT1G10350	177.754	-0.162949	0.509624	-0.319743	0.749163	0.90298
AT1G10360	74.9464	-1.14519	0.572515	-2.00029	0.0454693	0.204549
AT1G10370	409.086	-0.219363	0.32808	-0.668625	0.503735	0.764205
AT1G10380	286.772	1.94983	0.37198	5.24175	1.59e-07	1.57e-05
AT1G10385	6.45051	-1.97764	2.51474	-0.78642	0.431621	0.711116
AT1G10390	2736.84	0.0592862	0.220026	0.26945	0.787583	0.919733
AT1G10410	2308.2	-0.222328	0.254066	-0.87508	0.38153	0.670928
AT1G10430	272.097	0.0771817	0.351376	0.219656	0.826139	0.936186
AT1G10450	381.459	-0.421166	0.334617	-1.25865	0.208156	0.487876
AT1G10470	86.3678	0.19004	0.556988	0.341193	0.732958	0.895219
AT1G10490	77.607	0.732659	0.845072	0.866978	0.385954	0.673983
AT1G10500	1252.37	-0.578071	0.31334	-1.84487	0.0650562	0.251809
AT1G10510	272.402	-0.0918023	0.341399	-0.2689	0.788006	0.919833
AT1G10520	13.4451	3.23295	2.33061	1.38717	0.165391	0.432139
AT1G10522	116.899	-0.0763977	0.485483	-0.157364	0.874958	0.954775
AT1G10530	3.70116	4.90713	3.48942	1.40629	0.159639	NA
AT1G10540	1650.86	-1.19237	0.275683	-4.32513	1.52e-05	0.000636297
AT1G10550	22.2714	0.988329	1.14271	0.864897	0.387096	0.674517
AT1G10560	23.0445	3.71593	1.3666	2.71911	0.00654582	0.0589942
AT1G10570	226.973	0.52442	0.439073	1.19438	0.23233	0.520126
AT1G10580	1060.32	0.0571186	0.250709	0.227829	0.81978	0.933944
AT1G10588	12.7338	-0.516057	1.56052	-0.330695	0.740875	0.89909
AT1G10590	655.984	-0.194876	0.274279	-0.710505	0.477391	0.747521
AT1G10600	218.775	0.246839	0.412272	0.598727	0.549355	0.792676
AT1G10610	47.2947	0.143829	0.819447	0.17552	0.860671	0.950004
AT1G10620	7.31112	5.8963	3.02276	1.95064	0.0511001	0.21875
AT1G10630	1103.3	-0.558107	0.250407	-2.2288	0.0258271	0.143916
AT1G10640	30.2062	3.61222	1.18889	3.03831	0.00237909	0.0287653
AT1G10650	298.161	0.655881	0.360746	1.81812	0.0690453	0.261633
AT1G10657	23.4287	1.16897	1.02316	1.14251	0.253243	0.545119
AT1G10660	568.761	-0.525829	0.318084	-1.65311	0.0983077	0.321925
AT1G10670	5888.92	-0.219871	0.214976	-1.02277	0.306416	0.600317
AT1G10680	15.5485	0.948931	1.75222	0.541559	0.588123	0.817155
AT1G10690	405.511	-0.704202	0.379877	-1.85376	0.0637728	0.248832
AT1G10700	182.902	0.316855	0.423613	0.747983	0.454471	0.729136
AT1G10710	13.2717	-2.08643	1.64041	-1.2719	0.20341	0.482004
AT1G10717	2.02944	1.24464	3.65681	0.340362	0.733584	NA
AT1G10720	769.573	0.209253	0.253562	0.825252	0.409228	0.692638
AT1G10730	158.575	0.782359	0.527787	1.48234	0.13825	0.389556
AT1G10740	708.385	-0.364942	0.286807	-1.27243	0.203221	0.481811
AT1G10745	4.29908	0.214752	2.1139	0.101591	0.919082	0.969982
AT1G10750	26.8021	2.22918	1.19129	1.87122	0.0613141	0.24441
AT1G10760	892.157	0.000841651	0.370987	0.00226868	0.99819	0.999335
AT1G10770	397.633	2.11247	0.613471	3.44346	0.000574315	0.0100879
AT1G10780	25.8692	-0.0232594	1.13325	-0.0205245	0.983625	0.993572
AT1G10790	10.034	-0.669811	2.05639	-0.325721	0.744635	0.900623
AT1G10800	2.61584	1.68909	3.34599	0.50481	0.613692	NA
AT1G10810	5.37421	-1.87744	3.0983	-0.605958	0.544543	0.790275
AT1G10820	410.173	0.368301	0.4017	0.916856	0.359218	0.651375
AT1G10830	515.165	-0.970777	0.399636	-2.42916	0.015134	0.102202
AT1G10840	1826.81	-0.166859	0.272889	-0.611452	0.5409	0.788417
AT1G10850	97.2864	0.491946	0.632384	0.777922	0.436615	0.716266
AT1G10865	142.824	-0.615407	0.500897	-1.22861	0.219218	0.503224
AT1G10870	294.918	0.467782	0.373532	1.25232	0.210453	0.490797
AT1G10880	23.6326	-0.0453047	1.38687	-0.0326668	0.97394	0.989865
AT1G10890	499.318	0.756342	0.318021	2.37828	0.0173937	0.112035
AT1G10900	175.813	0.293099	0.519219	0.564499	0.572414	0.808638
AT1G10910	192.174	1.03323	0.499551	2.06833	0.0386094	0.18411
AT1G10920	103.494	1.6178	0.618301	2.61653	0.0088829	0.0727828
AT1G10930	86.6612	1.98557	0.577424	3.43867	0.00058459	0.0102237
AT1G10940	1063.37	-0.110458	0.233975	-0.472095	0.636859	0.846231
AT1G10950	1658.35	0.191934	0.239969	0.799828	0.42381	0.705542
AT1G10960	862.562	0.379677	0.282199	1.34542	0.178489	0.450546
AT1G10970	343.796	0.76792	0.394932	1.94443	0.0518431	0.220941
AT1G10980	2.79138	4.50642	3.75342	1.20062	0.229899	NA
AT1G10990	77.4737	-1.26453	1.12447	-1.12455	0.260778	0.553859
AT1G11000	31.1854	1.1723	0.899024	1.30397	0.192242	0.468063
AT1G11020	354.784	-0.416688	0.37139	-1.12197	0.261875	0.554914
AT1G11050	746.488	0.119984	0.320086	0.37485	0.707772	0.884586
AT1G11060	413.827	-0.290062	0.289083	-1.00339	0.315675	0.610942
AT1G11070	150.918	0.277405	0.430085	0.645	0.518927	0.775129
AT1G11080	3138.66	-0.27111	0.297905	-0.910055	0.362793	0.65459
AT1G11090	826.43	-0.112874	0.244962	-0.460783	0.644955	0.849767
AT1G11100	48.1131	-0.767609	0.91482	-0.839082	0.401423	0.686898
AT1G11120	3.17251	4.68852	3.07419	1.52512	0.127229	NA
AT1G11125	38.9314	0.26447	0.979884	0.269899	0.787238	0.91966
AT1G11130	106.223	0.581799	0.551929	1.05412	0.291828	0.586351
AT1G11160	14.2933	1.69516	1.59286	1.06422	0.287228	0.581259
AT1G11170	3008.66	-0.594337	0.304583	-1.95132	0.0510195	0.218638
AT1G11180	243.804	-1.14357	0.420248	-2.72117	0.00650512	0.0588038
AT1G11190	24640.9	-0.873641	0.23879	-3.65862	0.000253578	0.00544502
AT1G11200	370.116	-0.409793	0.322436	-1.27093	0.203755	0.482231
AT1G11210	2874.56	-0.19437	0.985187	-0.197292	0.843599	0.943689
AT1G11220	4.33631	1.37058	2.32436	0.589657	0.55542	0.796683
AT1G11240	181.063	1.038	0.414804	2.50239	0.0123358	0.0896041
AT1G11260	65150.1	-0.426494	0.298753	-1.42758	0.153412	0.414823
AT1G11270	102.557	0.516079	0.544442	0.947906	0.343177	0.637783
AT1G11280	211.52	1.38585	0.535868	2.58618	0.00970468	0.0769514
AT1G11290	15.8497	4.52161	1.64262	2.75268	0.00591094	0.0550691
AT1G11300	1.78305	0.149101	3.8364	0.0388649	0.968998	NA
AT1G11310	1449.35	0.0709702	0.28005	0.253419	0.799944	0.924717
AT1G11320	48.3962	0.605063	0.726587	0.832747	0.404987	0.68969
AT1G11330	357.367	1.09842	0.411159	2.67151	0.00755102	0.0653174
AT1G11350	39.4675	0.970404	1.00357	0.966955	0.333567	0.628388
AT1G11360	895.366	-0.023236	0.346321	-0.0670937	0.946507	0.981086
AT1G11362	14.3516	-0.571837	1.2808	-0.446468	0.655259	0.856359
AT1G11370	26.6496	-2.35247	3.31938	-0.708706	0.478507	0.747916
AT1G11380	486.943	-0.209309	0.278869	-0.750565	0.452915	0.727893
AT1G11390	357.082	0.381182	0.425906	0.89499	0.370793	0.66141
AT1G11400	830.228	0.864005	0.310365	2.78384	0.00537197	0.0514321
AT1G11410	124.751	1.27188	0.45648	2.78629	0.00533151	0.051262
AT1G11420	48.1078	0.717699	1.04765	0.685053	0.49331	0.758368
AT1G11430	1000.63	-0.301178	0.269431	-1.11783	0.263641	0.556836
AT1G11440	51.1495	1.18711	0.779557	1.5228	0.127809	0.372752
AT1G11450	7.20665	-0.929944	1.99046	-0.4672	0.640357	0.84711
AT1G11475	214.36	-0.519893	0.438182	-1.18648	0.235434	0.523803
AT1G11480	1414.29	0.243016	0.246873	0.984375	0.324931	0.619883
AT1G11510	29.7	-1.04957	1.14521	-0.916485	0.359412	0.651492
AT1G11530	45.4307	0.226742	0.771538	0.293883	0.768847	0.912086
AT1G11540	45.7761	-1.90361	0.83074	-2.29146	0.0219369	0.130298
AT1G11545	23.4863	2.50982	1.38232	1.81566	0.0694227	0.262211
AT1G11560	8.39815	-0.463026	1.56711	-0.295465	0.767638	0.911471
AT1G11570	27.9689	-1.06498	0.984233	-1.08204	0.279236	0.573376
AT1G11572	28.248	-0.929003	1.0006	-0.928448	0.353175	0.646658
AT1G11580	541.342	-0.0274806	0.497993	-0.0551827	0.955993	0.984062
AT1G11590	186.15	0.215405	0.631059	0.341339	0.732849	0.895219
AT1G11593	34.3871	-0.745874	1.19556	-0.623872	0.532712	0.783822
AT1G11608	2.24221	-5.06802	4.35184	-1.16457	0.244193	NA
AT1G11630	211.475	-0.0538366	0.393443	-0.136835	0.891162	0.962001
AT1G11650	3945.23	-0.263627	0.225612	-1.1685	0.242605	0.531893
AT1G11660	351.525	1.39374	0.403359	3.45534	0.000549601	0.00976641
AT1G11670	19.0883	5.81209	1.95409	2.97433	0.00293631	0.0336432
AT1G11680	1719.77	-0.184263	0.243279	-0.757414	0.448802	0.725088
AT1G11700	2466.49	-0.891389	0.283086	-3.14883	0.00163924	0.0220061
AT1G11710	42.1112	-0.0473765	0.991998	-0.0477587	0.961909	0.985972
AT1G11720	321.611	0.783975	0.407375	1.92446	0.0542975	0.227241
AT1G11730	8.23625	0.308843	1.83056	0.168715	0.866021	0.951715
AT1G11740	3.79756	0.669292	2.31352	0.289296	0.772355	NA
AT1G11750	676.921	-0.286317	0.304141	-0.941395	0.346502	0.640937
AT1G11755	185.025	-0.682452	0.44609	-1.52985	0.126053	0.369879
AT1G11760	125.841	-0.724241	0.579924	-1.24885	0.211718	0.492797
AT1G11765	57.1119	1.61403	1.044	1.546	0.122104	0.362667
AT1G11770	61.8395	2.25094	1.13048	1.99113	0.0464661	0.207327
AT1G11780	179.405	0.439314	0.486504	0.903003	0.366524	0.657791
AT1G11790	109.934	1.05007	0.579487	1.81207	0.0699749	0.26368
AT1G11800	199.194	0.597149	0.468842	1.27367	0.202781	0.481204
AT1G11810	2.5879	-1.72648	3.8793	-0.44505	0.656284	NA
AT1G11820	257.654	-0.0278242	0.473853	-0.058719	0.953176	0.983094
AT1G11840	3669.61	0.839338	0.259994	3.22829	0.00124531	0.0180521
AT1G11850	48.7774	2.06285	1.03944	1.98458	0.0471913	0.208968
AT1G11860	980.206	1.09891	0.30109	3.64976	0.000262483	0.0055825
AT1G11870	103.334	0.867959	0.548443	1.58259	0.113516	0.347996
AT1G11880	66.8448	-1.08463	0.689872	-1.57222	0.1159	0.352308
AT1G11890	523.141	-0.289614	0.302648	-0.956933	0.338601	0.633516
AT1G11900	69.0374	-0.22742	0.787479	-0.288795	0.772739	0.913888
AT1G11905	821.926	-0.151332	0.250733	-0.603558	0.546138	0.791406
AT1G11910	42783.6	-0.98527	0.196866	-5.00477	5.59e-07	4.47e-05
AT1G11915	26.1757	-0.754242	0.956694	-0.788383	0.430472	0.710634
AT1G11930	811.995	-0.187347	0.330225	-0.567332	0.570489	0.807469
AT1G11940	162.646	-0.561554	0.453181	-1.23914	0.215295	0.497637
AT1G11950	18.7244	0.0350995	1.13776	0.0308497	0.975389	0.990237
AT1G11960	231.23	-0.265607	0.402653	-0.659644	0.509482	0.76828
AT1G11990	3.27944	4.74044	3.62792	1.30666	0.191329	NA
AT1G12000	833.714	0.109862	0.24101	0.455841	0.648504	0.852263
AT1G12010	81403.8	-0.480349	0.193402	-2.48368	0.0130032	0.0925438
AT1G12020	11.588	3.43808	1.70389	2.01778	0.0436144	0.19901
AT1G12030	12.9052	-1.73556	1.813	-0.957288	0.338422	0.633343
AT1G12050	2887.7	-0.591943	0.239133	-2.47537	0.0133096	0.0938054
AT1G12060	118.197	0.533957	0.54151	0.986052	0.324108	0.6189
AT1G12070	3.88833	4.98471	3.38629	1.47202	0.141014	0.39409
AT1G12080	1288.11	0.648793	0.287377	2.25764	0.0239681	0.137488
AT1G12090	4190.43	1.00408	0.284668	3.5272	0.000419979	0.00795227
AT1G12110	57.9667	-0.5469	0.711647	-0.768499	0.442191	0.720163
AT1G12120	499.652	1.50345	0.428813	3.50606	0.000454788	0.00841547
AT1G12130	7.62841	-1.10275	2.48835	-0.443165	0.657646	0.857865
AT1G12140	747.486	-0.0591847	0.267604	-0.221165	0.824964	0.935984
AT1G12150	432.397	0.095786	0.313127	0.305901	0.75968	0.90743
AT1G12160	34.3318	-1.21176	1.11064	-1.09105	0.275253	0.569242
AT1G12180	437.851	-1.09907	0.553758	-1.98475	0.0471725	0.208931
AT1G12200	2634.15	-0.719362	0.295817	-2.43178	0.0150248	0.101807
AT1G12210	51.259	-1.17395	0.864481	-1.35798	0.17447	0.444691
AT1G12220	21.7258	-0.666412	1.08345	-0.615081	0.538501	0.787206
AT1G12230	686.55	0.17604	0.261733	0.672595	0.501205	0.762572
AT1G12240	3627.98	0.365919	0.318087	1.15037	0.249991	0.540732
AT1G12244	101.267	-1.19354	0.6718	-1.77664	0.0756282	0.276472
AT1G12250	174.988	0.241237	0.454979	0.530216	0.595962	0.821838
AT1G12260	77.7729	2.13282	0.700832	3.04327	0.00234023	0.0284757
AT1G12270	491.377	0.880765	0.342529	2.57136	0.0101301	0.0790932
AT1G12280	133.413	0.188771	0.492118	0.38359	0.701283	0.88197
AT1G12290	33.8302	-0.817933	1.18836	-0.688286	0.491273	0.756793
AT1G12300	109.008	-0.721521	0.817614	-0.882471	0.377522	0.667662
AT1G12310	1142.86	-0.380125	0.251486	-1.51152	0.130657	0.377275
AT1G12320	143.563	0.496815	0.569204	0.872824	0.382759	0.671651
AT1G12330	431.152	1.74373	0.474201	3.67719	0.00023582	0.00514188
AT1G12350	207.772	-0.85295	0.390744	-2.18289	0.0290442	0.154715
AT1G12360	818.76	0.293188	0.355963	0.823647	0.41014	0.693655
AT1G12370	89.6376	2.72342	0.928393	2.93348	0.00335181	0.0370359
AT1G12380	976.619	2.00047	0.405945	4.92793	8.31e-07	6.05e-05
AT1G12390	449.554	-0.885975	0.323154	-2.74165	0.00611315	0.0564293
AT1G12400	109.274	-0.666012	0.53432	-1.24647	0.212593	0.494066
AT1G12410	933.245	-0.0724792	0.237802	-0.304788	0.760527	0.907957
AT1G12420	298.36	0.0200192	0.368017	0.0543975	0.956618	0.984268
AT1G12430	767.066	0.861626	0.277996	3.09941	0.00193904	0.0248595
AT1G12440	2673.09	-0.630593	0.231814	-2.72026	0.00652316	0.0588609
AT1G12450	441.469	-0.29186	0.329769	-0.885042	0.376134	0.666282
AT1G12460	94.8566	1.78493	0.779404	2.29012	0.0220143	0.130424
AT1G12470	393.366	0.533839	0.296126	1.80274	0.0714286	0.266804
AT1G12480	4.14625	-0.795492	2.89411	-0.274866	0.783419	0.918685
AT1G12500	666.741	1.56049	0.258175	6.0443	1.5e-09	3.05e-07
AT1G12520	1970.39	-0.0818762	0.28394	-0.288357	0.773073	0.913888
AT1G12530	199.029	0.287787	0.406745	0.707535	0.479234	0.748353
AT1G12550	169.895	0.582089	0.444775	1.30873	0.190627	0.466108
AT1G12570	25.951	4.65554	1.23291	3.77606	0.000159326	0.00378554
AT1G12580	373.52	0.148444	0.33222	0.446825	0.655001	0.856206
AT1G12600	91.2369	-0.81564	0.597617	-1.36482	0.172309	0.441651
AT1G12610	23.5377	-0.224717	1.30833	-0.171759	0.863627	0.95086
AT1G12620	76.0422	2.5419	0.636813	3.9916	6.56e-05	0.00191515
AT1G12640	2095.34	-0.797553	0.269895	-2.95505	0.00312622	0.0352613
AT1G12650	182.814	0.771451	0.495774	1.55605	0.119695	0.358358
AT1G12660	4.98192	3.83069	2.46548	1.55373	0.120248	0.359206
AT1G12672	12.0709	-1.00646	1.43733	-0.700228	0.483785	0.751576
AT1G12680	1557.08	-0.228742	0.222059	-1.0301	0.302964	0.597271
AT1G12700	48.7505	0.531252	0.77581	0.684771	0.493489	0.758368
AT1G12710	75.4501	-0.191228	0.638964	-0.299278	0.764728	0.909947
AT1G12730	145.137	-0.650531	0.499475	-1.30243	0.192769	0.468656
AT1G12750	65.0208	0.690805	0.71362	0.968028	0.33303	0.627817
AT1G12760	2312.82	-0.558281	0.228362	-2.44472	0.0144965	0.0993672
AT1G12770	380.133	1.37766	0.386836	3.56136	0.000368943	0.00721957
AT1G12775	60.9046	1.79805	0.744035	2.41662	0.0156652	0.10435
AT1G12780	15731.5	-0.667469	0.212725	-3.13771	0.00170276	0.022655
AT1G12790	93.0278	-0.761705	0.575206	-1.32423	0.185427	0.46063
AT1G12800	250.283	1.21906	0.433515	2.81203	0.00492293	0.0481962
AT1G12810	1301.16	-0.514336	0.251406	-2.04584	0.0407725	0.190547
AT1G12820	1268.86	-0.0807022	0.225759	-0.357471	0.720739	0.889384
AT1G12830	451.1	0.615219	0.379065	1.62299	0.104592	0.332998
AT1G12840	1828.41	-0.176142	0.247978	-0.71031	0.477512	0.747561
AT1G12845	2.4927	0.864871	3.99798	0.216327	0.828733	NA
AT1G12850	790.549	-0.13499	0.288211	-0.46837	0.63952	0.84683
AT1G12860	35.9633	1.37909	0.929404	1.48384	0.137851	0.38915
AT1G12880	217.127	-0.917458	0.384166	-2.38818	0.0169321	0.110229
AT1G12890	12.3294	0.847659	1.39311	0.608467	0.542878	0.789533
AT1G12900	1257.27	0.678121	0.331801	2.04376	0.0409775	0.191261
AT1G12910	1304.98	-0.988977	0.267859	-3.69216	0.000222358	0.00491661
AT1G12920	1617.65	0.274614	0.29165	0.941588	0.346404	0.640813
AT1G12930	325.1	0.0781947	0.320348	0.244093	0.807159	0.928038
AT1G12940	4.77457	0.164517	2.74075	0.0600262	0.952135	0.982951
AT1G12950	30.1888	-0.308261	1.14064	-0.270254	0.786965	0.919589
AT1G12970	305.022	-0.267938	0.32764	-0.817782	0.413482	0.696724
AT1G12980	6.02769	5.61028	3.00547	1.86669	0.061945	0.245348
AT1G12990	383.232	-0.333676	0.321626	-1.03747	0.299519	0.593978
AT1G13000	307.536	0.51671	0.413452	1.24975	0.211392	0.492414
AT1G13020	820.969	0.814467	0.325133	2.50502	0.0122443	0.0892626
AT1G13030	68.0233	1.11438	0.725942	1.53508	0.124764	0.366964
AT1G13040	18.9658	-2.0389	1.63781	-1.24489	0.213171	0.494778
AT1G13050	35.1103	0.647958	0.799308	0.810649	0.417567	0.700318
AT1G13060	2394.32	-0.525986	0.302978	-1.73605	0.0825548	0.290934
AT1G13080	389.402	-0.934447	0.469523	-1.99021	0.0465681	0.20749
AT1G13090	1524.47	-0.01728	0.292072	-0.0591637	0.952822	0.982975
AT1G13100	17.5118	-2.3005	1.2792	-1.79839	0.0721148	0.268418
AT1G13110	31.1946	0.437114	0.968675	0.451249	0.65181	0.854036
AT1G13120	184.777	0.756486	0.567066	1.33404	0.182192	0.456067
AT1G13130	78.9869	1.8867	0.630977	2.99012	0.00278864	0.0324378
AT1G13140	34.2188	-0.552044	0.884419	-0.624188	0.532504	0.783689
AT1G13150	24.17	-0.305275	0.996488	-0.306351	0.759337	0.90709
AT1G13160	276.104	-0.213213	0.387996	-0.549524	0.582646	0.813988
AT1G13170	174.022	0.821134	0.459771	1.78597	0.0741048	0.272891
AT1G13180	228.738	0.0754616	0.365255	0.2066	0.836322	0.940716
AT1G13190	1312.58	0.221305	0.254865	0.868324	0.385217	0.673224
AT1G13195	136.398	-0.605533	0.481145	-1.25853	0.208202	0.487879
AT1G13210	525.818	0.147021	0.415347	0.353971	0.72336	0.890648
AT1G13220	302.834	0.37837	0.445757	0.848827	0.395977	0.682817
AT1G13230	13.0407	-2.04135	1.9612	-1.04086	0.297939	0.592469
AT1G13245	617.654	-0.731929	0.304042	-2.40733	0.0160696	0.106128
AT1G13250	560.193	2.52966	0.566796	4.46309	8.08e-06	0.000378761
AT1G13260	234.997	-0.538734	0.521897	-1.03226	0.30195	0.596377
AT1G13270	121.106	-0.347769	0.561529	-0.619325	0.535702	0.785574
AT1G13280	1117.38	0.811199	0.257196	3.15401	0.00161041	0.0217725
AT1G13320	860.118	0.0476621	0.246403	0.193432	0.846621	0.944942
AT1G13330	24.2912	-0.401506	0.969705	-0.414049	0.678838	0.870105
AT1G13340	155.528	-0.415537	0.429169	-0.968235	0.332927	0.627748
AT1G13350	477.535	-0.299172	0.357896	-0.835919	0.4032	0.688497
AT1G13360	1097.47	-0.419626	0.324383	-1.29361	0.195799	0.472312
AT1G13380	226.104	0.214004	0.480839	0.445063	0.656274	0.856921
AT1G13390	907.417	-0.371442	0.346271	-1.07269	0.28341	0.578229
AT1G13410	23.2129	1.77563	1.3993	1.26894	0.204461	0.482879
AT1G13420	18.5051	-0.487595	1.45319	-0.335533	0.737223	0.897044
AT1G13440	21336.3	0.111027	0.192201	0.577662	0.563492	0.802186
AT1G13450	443.132	0.285106	0.438679	0.64992	0.515744	0.772432
AT1G13460	145.48	-0.0155193	0.515251	-0.0301199	0.975971	0.990237
AT1G13520	14.7733	-0.224994	1.33784	-0.168177	0.866444	0.951715
AT1G13550	2.63855	4.41834	4.42378	0.998771	0.317906	NA
AT1G13560	809.373	-0.578637	0.261168	-2.21558	0.0267205	0.1473
AT1G13570	378.905	-0.484891	0.310954	-1.55937	0.11891	0.357068
AT1G13580	257.58	-0.350144	0.37519	-0.933244	0.350694	0.644651
AT1G13605	13.2841	-1.3207	1.40397	-0.940692	0.346863	0.641308
AT1G13630	8.36719	6.08505	2.23877	2.71803	0.00656714	0.0591249
AT1G13635	13.1009	-0.0670564	1.50252	-0.0446293	0.964403	0.987067
AT1G13640	339.744	-0.130722	0.332368	-0.393305	0.694094	0.87765
AT1G13650	7.69597	0.146921	2.41515	0.0608333	0.951492	0.982793
AT1G13670	5.7957	2.35118	2.6666	0.881715	0.377931	0.667874
AT1G13680	11.424	-0.863813	1.74742	-0.494337	0.621068	0.838275
AT1G13690	397.489	-0.224059	0.388974	-0.576025	0.564598	0.803112
AT1G13700	882.39	-0.567885	0.291992	-1.94487	0.0517909	0.220865
AT1G13710	14.379	6.86742	2.44031	2.81416	0.00489047	0.0479658
AT1G13730	276.03	0.714379	0.45463	1.57134	0.116103	0.352434
AT1G13740	592.016	0.585946	0.373827	1.56743	0.117015	0.353995
AT1G13750	27.1154	-0.109438	1.18185	-0.0925992	0.926222	0.972302
AT1G13755	74.1889	-0.700425	0.623376	-1.1236	0.261183	0.553959
AT1G13770	325.129	-0.945516	0.326725	-2.89392	0.00380467	0.040631
AT1G13780	165.783	-0.668063	0.430745	-1.55095	0.120914	0.36066
AT1G13790	52.7928	-0.029812	0.694343	-0.0429356	0.965753	0.987718
AT1G13810	62.6535	0.926998	0.636804	1.4557	0.145475	0.401304
AT1G13820	96.0324	0.4081	0.589446	0.692345	0.488721	0.755122
AT1G13830	425.151	0.339398	0.370086	0.917078	0.359102	0.651375
AT1G13860	101.958	-0.368567	0.605772	-0.608426	0.542905	0.789533
AT1G13870	372.591	0.285889	0.333067	0.858353	0.390697	0.677943
AT1G13880	906.514	-0.168409	0.26651	-0.631905	0.527449	0.780426
AT1G13890	3.85392	3.44045	3.62375	0.949418	0.342408	0.637297
AT1G13900	610.665	0.151282	0.281866	0.536715	0.591465	0.819124
AT1G13910	235.101	-0.568633	0.42661	-1.33291	0.182561	0.456506
AT1G13920	92.3121	-0.254282	0.583508	-0.435782	0.662995	0.860978
AT1G13930	14472.5	0.0802278	0.740153	0.108394	0.913684	0.968281
AT1G13940	259.689	0.221938	0.410858	0.540181	0.589072	0.817558
AT1G13950	35.4475	1.40502	0.881168	1.5945	0.110825	0.34415
AT1G13960	483.334	0.298661	0.364834	0.818622	0.413002	0.696316
AT1G13970	157.769	1.67891	0.598574	2.80485	0.00503401	0.0490946
AT1G13980	785.128	0.250495	0.259864	0.963946	0.335073	0.629716
AT1G13990	2020.03	-0.714653	0.208168	-3.43305	0.000596833	0.0103835
AT1G14000	1569.75	0.218444	0.246313	0.886855	0.375157	0.665197
AT1G14010	390.982	-0.134778	0.373763	-0.360597	0.718401	0.888494
AT1G14020	203.378	0.664188	0.378057	1.75685	0.0789437	0.283838
AT1G14030	116.886	0.815291	0.488403	1.6693	0.0950581	0.315817
AT1G14040	27.8735	0.556446	0.962231	0.578287	0.56307	0.801983
AT1G14060	182.776	-0.0816106	0.45091	-0.180991	0.856375	0.947923
AT1G14070	23.5496	0.135407	1.22483	0.110552	0.911972	0.968033
AT1G14080	24.2725	0.813889	1.03944	0.78301	0.433621	0.71365
AT1G14130	3605.73	0.0463144	0.24549	0.188661	0.850358	0.946253
AT1G14140	113.521	0.92225	0.677279	1.3617	0.173293	0.442816
AT1G14150	18.4728	1.84087	1.21462	1.51559	0.129623	0.375521
AT1G14170	170.996	1.6942	0.596322	2.84108	0.0044961	0.0454766
AT1G14180	98.6286	1.01001	0.542701	1.86109	0.0627319	0.246906
AT1G14190	6.35267	5.69009	2.49257	2.28282	0.0224409	0.131611
AT1G14200	816.473	-0.521799	0.414747	-1.25811	0.208351	0.488039
AT1G14210	51.7871	0.936904	0.720586	1.3002	0.193533	0.469328
AT1G14220	9.67067	-1.61198	1.79556	-0.897761	0.369313	0.660189
AT1G14230	681.898	-0.371674	0.277142	-1.3411	0.179889	0.453041
AT1G14240	172.54	0.18397	0.406473	0.452602	0.650836	0.853614
AT1G14250	12.1167	-0.654389	1.87528	-0.348956	0.727123	0.892544
AT1G14260	28.2507	-0.393178	1.0495	-0.374635	0.707932	0.884617
AT1G14270	160.916	-0.611281	0.42032	-1.45432	0.145856	0.402059
AT1G14280	5.95487	5.59196	2.67632	2.08942	0.0366695	0.178584
AT1G14290	108.392	1.04206	0.514365	2.02592	0.0427728	0.19651
AT1G14300	162.51	-0.0797155	0.435549	-0.183023	0.85478	0.947353
AT1G14310	168.984	-0.47893	0.516238	-0.927732	0.353546	0.646697
AT1G14320	6124.58	-0.427864	0.224799	-1.90332	0.0569984	0.233712
AT1G14330	2508.01	-0.587936	0.262609	-2.23883	0.0251673	0.141709
AT1G14340	621.743	-0.414327	0.269493	-1.53743	0.124188	0.366094
AT1G14345	327.481	0.290649	0.522297	0.556482	0.577882	0.811835
AT1G14350	419.967	0.582645	0.309269	1.88395	0.0595724	0.240131
AT1G14360	606.866	-0.45973	0.327471	-1.40388	0.160354	0.424447
AT1G14370	136.073	-0.375297	0.456993	-0.821231	0.411515	0.695118
AT1G14380	1706.17	0.42156	0.261882	1.60973	0.107456	0.338169
AT1G14390	6.4819	-0.472303	2.5162	-0.187705	0.851108	0.946477
AT1G14400	5969.81	-0.417421	0.252845	-1.6509	0.09876	0.322474
AT1G14410	130.9	0.362015	0.509742	0.710192	0.477585	0.747561
AT1G14420	175.87	6.02031	1.52416	3.94992	7.82e-05	0.00218906
AT1G14430	50.8117	-0.0429988	1.12171	-0.0383333	0.969422	0.988408
AT1G14440	419.716	5.62396	1.15115	4.88553	1.03e-06	7.22e-05
AT1G14450	512.473	-0.624607	0.301227	-2.07354	0.038122	0.182794
AT1G14455	178.446	-0.652059	0.39218	-1.66265	0.0963824	0.318347
AT1G14460	386.405	0.422324	0.400309	1.05499	0.291428	0.586254
AT1G14470	15.8279	0.677376	1.66128	0.407743	0.683463	0.8724
AT1G14480	179.397	0.0353846	0.737877	0.0479546	0.961752	0.985863
AT1G14490	13.8156	-0.673012	1.55776	-0.432038	0.665714	0.862516
AT1G14510	983.009	0.25933	0.245891	1.05465	0.291583	0.586291
AT1G14520	366.321	0.0370651	0.330817	0.112041	0.910791	0.967945
AT1G14530	275.656	-0.296733	0.381443	-0.777921	0.436616	0.716266
AT1G14540	43.1663	0.136078	0.725279	0.187621	0.851173	0.946497
AT1G14560	406.853	-0.54081	0.344041	-1.57194	0.115965	0.352338
AT1G14570	1765.1	-0.10262	0.22505	-0.455988	0.648399	0.852263
AT1G14580	50.9449	1.00119	0.695377	1.43977	0.149931	0.408304
AT1G14590	170.782	-0.341349	0.44714	-0.763405	0.445222	0.722555
AT1G14600	11.4827	0.442905	1.80257	0.245708	0.805908	0.927542
AT1G14610	1387.85	0.455903	0.269734	1.69019	0.0909915	0.308408
AT1G14620	97.5709	0.32244	0.498879	0.646329	0.518066	0.77436
AT1G14630	13.5693	5.31593	1.92649	2.75938	0.00579103	0.0542035
AT1G14640	145.59	0.0250894	0.508355	0.0493541	0.960637	0.985379
AT1G14650	2160.17	0.285756	0.211889	1.34861	0.177461	0.449348
AT1G14660	68.5005	-0.323321	0.882683	-0.366293	0.714146	0.886779
AT1G14670	1621.49	-0.166026	0.232228	-0.714926	0.474655	0.745377
AT1G14680	44.17	1.39967	0.786309	1.78005	0.075068	0.275025
AT1G14685	689.17	-0.251398	0.352686	-0.712809	0.475964	0.746673
AT1G14686	2.83979	2.9568	3.40947	0.867232	0.385815	NA
AT1G14687	161.789	0.385946	0.480785	0.802741	0.422124	0.70417
AT1G14690	1444.75	0.553862	0.337238	1.64235	0.100518	0.32551
AT1G14700	254.439	-0.634131	0.519954	-1.21959	0.22262	0.506521
AT1G14710	769.121	0.943972	0.368175	2.56392	0.0103497	0.0802281
AT1G14720	249.454	0.407941	0.488048	0.835862	0.403233	0.688497
AT1G14730	115.773	-0.489534	0.519725	-0.94191	0.346239	0.64076
AT1G14740	1576.53	0.625853	0.25399	2.46408	0.0137364	0.0960256
AT1G14750	9.52276	-0.830134	2.28921	-0.362629	0.716882	0.887881
AT1G14755	32.9861	-0.937037	0.971316	-0.964709	0.334691	0.629436
AT1G14760	7.31922	-2.30013	2.51727	-0.91374	0.360853	0.652767
AT1G14770	92.6523	0.817413	0.572659	1.4274	0.153465	0.414851
AT1G14780	858.462	-0.335672	0.271415	-1.23675	0.216181	0.498996
AT1G14790	1276.84	0.572299	0.256962	2.22718	0.0259356	0.14424
AT1G14810	304.673	0.451322	0.412616	1.09381	0.274039	0.567379
AT1G14820	159.771	0.211414	0.438221	0.482436	0.629496	0.842502
AT1G14830	1000.04	0.36503	0.269462	1.35466	0.175525	0.446168
AT1G14840	114.994	2.73818	0.754691	3.62821	0.00028539	0.00596172
AT1G14850	370.992	-0.183796	0.324802	-0.565871	0.571481	0.808059
AT1G14860	7.31242	-0.860904	2.12535	-0.405065	0.68543	0.873218
AT1G14870	230.639	-1.51378	0.408843	-3.7026	0.000213405	0.00476059
AT1G14890	4125.08	-0.167855	0.243988	-0.687963	0.491476	0.75699
AT1G14900	885.97	0.243429	0.243113	1.0013	0.316682	0.612114
AT1G14910	1140.84	-0.240021	0.245082	-0.979352	0.327406	0.622769
AT1G14920	371.953	-0.718635	0.308428	-2.33	0.0198064	0.12183
AT1G14970	25.234	0.885873	0.980994	0.903036	0.366507	0.657791
AT1G14980	1253.87	-0.436449	0.352356	-1.23866	0.215471	0.497873
AT1G14990	121.644	-0.169012	0.542059	-0.311796	0.755196	0.905323
AT1G15000	2915.79	-0.51732	0.293273	-1.76395	0.0777397	0.281424
AT1G15010	457.425	-1.3106	0.427355	-3.06678	0.00216377	0.0268858
AT1G15015	9.01958	-3.33906	2.64951	-1.26026	0.207576	0.487514
AT1G15020	350.699	0.386715	0.353483	1.09401	0.273949	0.567378
AT1G15030	373.273	-0.733848	0.361647	-2.02918	0.0424399	0.195428
AT1G15040	386.622	0.717431	0.311644	2.30208	0.0213305	0.127998
AT1G15060	318.902	-0.996066	0.34128	-2.91862	0.00351589	0.0383009
AT1G15080	28.1498	0.742597	0.883592	0.84043	0.400668	0.686424
AT1G15100	556.089	-1.07503	0.301723	-3.56299	0.000366658	0.00718185
AT1G15110	697.023	-0.636368	0.278387	-2.28591	0.0222593	0.130826
AT1G15120	652.013	-0.0351881	0.285189	-0.123385	0.901802	0.964802
AT1G15125	14.375	-2.6745	1.29725	-2.06167	0.0392392	0.1863
AT1G15130	2382.08	-0.054193	0.239307	-0.226458	0.820845	0.934134
AT1G15140	482.353	-0.420812	0.304339	-1.38271	0.166755	0.434158
AT1G15150	52.6416	-0.713536	1.29862	-0.549456	0.582692	0.813988
AT1G15160	2.12434	-1.37548	3.59098	-0.383036	0.701693	NA
AT1G15165	8.49149	-5.99384	2.67166	-2.24349	0.0248654	0.140626
AT1G15170	51.9516	-0.225896	0.649558	-0.347769	0.728014	0.89285
AT1G15180	17.9765	-1.30657	1.50088	-0.870537	0.384007	0.672572
AT1G15190	19.0445	-0.196801	1.15721	-0.170065	0.864959	0.951497
AT1G15200	603.174	0.612252	0.365589	1.6747	0.0939932	0.314098
AT1G15210	5.33018	5.43836	2.58672	2.10241	0.0355173	0.175032
AT1G15215	90.1884	-0.156672	0.642931	-0.243684	0.807475	0.928129
AT1G15220	253.078	-0.49438	0.388293	-1.27321	0.202942	0.481359
AT1G15230	1011.21	-0.65656	0.287169	-2.28632	0.0222354	0.1308
AT1G15240	699.194	-0.345414	0.294932	-1.17116	0.241533	0.530988
AT1G15250	53.102	0.68555	0.796136	0.861097	0.389185	0.676625
AT1G15260	80.8405	2.73299	0.649006	4.21104	2.54e-05	0.000943369
AT1G15270	3391.72	-0.251756	0.277577	-0.90698	0.364418	0.656357
AT1G15280	1129.73	0.114664	0.248327	0.461746	0.644264	0.849434
AT1G15290	404.738	-0.139764	0.439257	-0.318182	0.750347	0.90354
AT1G15310	558.728	0.038695	0.332569	0.116351	0.907374	0.966647
AT1G15330	3.07482	4.6444	3.62192	1.2823	0.199736	NA
AT1G15340	3002.92	0.268141	0.287707	0.931992	0.351341	0.644778
AT1G15350	698.498	-0.18236	0.262461	-0.694808	0.487176	0.753953
AT1G15370	817.379	-0.527267	0.344428	-1.53085	0.125806	0.369426
AT1G15380	4607.11	-0.398758	0.277917	-1.43481	0.151342	0.411163
AT1G15385	3.09912	-1.01397	3.19745	-0.317117	0.751155	NA
AT1G15390	340.363	-0.412921	0.378987	-1.08954	0.275917	0.569778
AT1G15400	1158.29	-0.993096	0.281631	-3.52623	0.00042152	0.00796129
AT1G15410	102.573	1.17417	0.574986	2.04209	0.0411426	0.191474
AT1G15415	6.9117	2.64137	2.02083	1.30707	0.191188	0.466685
AT1G15420	159.063	-0.42295	0.524986	-0.80564	0.42045	0.702921
AT1G15430	625.183	0.0301712	0.257541	0.117151	0.90674	0.966623
AT1G15440	189.3	0.441437	0.42816	1.03101	0.302537	0.596957
AT1G15460	32.9138	1.00146	1.10844	0.90349	0.366266	0.657651
AT1G15470	264.25	0.204697	0.435014	0.470554	0.637959	0.846281
AT1G15480	48.1656	1.59292	0.875993	1.81842	0.0689996	0.261579
AT1G15490	260.264	-0.445015	0.352583	-1.26215	0.206893	0.48645
AT1G15500	1138.37	-0.156669	0.260792	-0.600743	0.548011	0.792225
AT1G15510	51.6729	-0.939726	0.716575	-1.31141	0.189718	0.465189
AT1G15520	108.759	-0.303116	0.502065	-0.603739	0.546017	0.791406
AT1G15530	288.652	0.117298	0.378086	0.310242	0.756377	0.905942
AT1G15550	482.783	2.568	0.587196	4.37333	1.22e-05	0.000528333
AT1G15570	27.8732	2.29712	1.30449	1.76093	0.0782503	0.282761
AT1G15580	26.049	1.02424	1.35299	0.757017	0.449039	0.725088
AT1G15610	70.9777	-0.736434	0.76151	-0.96707	0.333509	0.628365
AT1G15620	65.1841	0.341233	0.814104	0.419151	0.675105	0.868462
AT1G15660	196.707	0.288395	0.410058	0.703302	0.481867	0.750445
AT1G15670	12204.9	-0.697362	0.192218	-3.62797	0.000285659	0.00596172
AT1G15690	20662.2	0.0328229	0.198395	0.165442	0.868596	0.952731
AT1G15700	87.1512	-0.00873729	0.591802	-0.0147639	0.988221	0.995233
AT1G15710	307.977	0.0698356	0.351896	0.198455	0.842689	0.943333
AT1G15720	121.24	-0.130397	0.472911	-0.275733	0.782753	0.918488
AT1G15730	277.486	-0.346703	0.409415	-0.846827	0.397092	0.683388
AT1G15740	5165.09	-0.623753	0.280127	-2.22668	0.0259689	0.144346
AT1G15750	4092.04	-0.128423	0.220366	-0.582773	0.560046	0.799662
AT1G15760	58.8089	1.97874	0.926854	2.1349	0.0327688	0.167319
AT1G15772	26.4973	-1.09873	1.12437	-0.977202	0.328469	0.623933
AT1G15780	1870.96	-0.301828	0.219974	-1.37211	0.170029	0.438253
AT1G15790	58.8027	-0.102493	0.730613	-0.140284	0.888436	0.960431
AT1G15800	285.458	-0.186192	0.529516	-0.351627	0.725118	0.891699
AT1G15810	330.335	0.618197	0.405098	1.52604	0.126999	0.371384
AT1G15820	6301.63	0.856902	0.314212	2.72715	0.00638845	0.0581946
AT1G15830	31.7407	0.761047	1.2164	0.625652	0.531543	0.78297
AT1G15860	524.532	0.0136097	0.415607	0.0327465	0.973877	0.989865
AT1G15870	10.9719	6.48181	2.37552	2.72859	0.00636058	0.058046
AT1G15880	731.648	-0.350424	0.323732	-1.08245	0.279053	0.573268
AT1G15885	5.30327	-0.367259	2.01555	-0.182213	0.855416	0.947419
AT1G15900	8.02337	-1.08643	1.59368	-0.681712	0.495421	0.75928
AT1G15910	242.683	1.40366	0.423632	3.3134	0.000921683	0.0142016
AT1G15920	577.427	-0.202243	0.318448	-0.635089	0.525371	0.779163
AT1G15930	802.963	-0.0874423	0.322472	-0.271163	0.786266	0.919493
AT1G15940	565.207	0.29368	0.276438	1.06237	0.288067	0.582212
AT1G15950	8219.29	-0.349251	0.205643	-1.69834	0.0894441	0.305195
AT1G15960	773.313	-0.428022	0.366447	-1.16803	0.242794	0.5321
AT1G15970	139.501	0.953894	0.46181	2.06556	0.0388703	0.184929
AT1G15980	74.2641	1.14539	0.629942	1.81824	0.0690273	0.261631
AT1G16000	50.2314	-0.0845839	0.759659	-0.111345	0.911343	0.967965
AT1G16010	1798.37	-0.436084	0.210281	-2.07381	0.0380969	0.182794
AT1G16020	82.366	0.769868	0.733928	1.04897	0.294193	0.588532
AT1G16022	15.2291	0.586087	1.33238	0.43988	0.660024	0.858483
AT1G16030	123.311	0.829212	0.573363	1.44622	0.148114	0.405743
AT1G16040	119.494	-0.284212	0.512655	-0.554393	0.57931	0.812316
AT1G16060	47.1325	0.0460902	0.793158	0.0581097	0.953661	0.983278
AT1G16080	432.041	0.465104	0.345621	1.34571	0.178397	0.45047
AT1G16090	8.24104	6.06112	2.37711	2.54978	0.010779	0.0825678
AT1G16110	160.868	-0.289733	0.589704	-0.49132	0.6232	0.839313
AT1G16120	10.0582	0.0194728	1.91749	0.0101554	0.991897	0.996863
AT1G16130	263.936	0.300779	0.41667	0.721864	0.470378	0.742027
AT1G16150	7.12466	4.36329	2.38236	1.8315	0.0670261	0.256859
AT1G16170	256.198	-0.585752	0.353343	-1.65774	0.0973691	0.320006
AT1G16180	8797.75	-0.557002	0.193165	-2.88356	0.00393208	0.0414624
AT1G16190	521.834	0.45595	0.300308	1.51828	0.128945	0.374692
AT1G16210	2878.58	0.226594	0.24064	0.941632	0.346381	0.640813
AT1G16220	9.59094	0.0446585	1.70366	0.0262133	0.979087	0.991583
AT1G16240	2371.71	-0.448516	0.215464	-2.08163	0.0373762	0.18062
AT1G16250	255.741	-0.568707	0.370299	-1.53581	0.124586	0.366627
AT1G16260	7.18586	5.86462	2.37517	2.46914	0.0135438	0.094944
AT1G16270	588.259	-0.0150398	0.364277	-0.0412867	0.967067	0.98794
AT1G16280	174.317	-0.135414	0.456624	-0.296555	0.766806	0.911064
AT1G16290	10.4549	-0.281501	1.7743	-0.158655	0.873941	0.954475
AT1G16300	113.36	-0.0661699	0.561276	-0.117892	0.906153	0.966214
AT1G16310	740.856	-0.510336	0.459131	-1.11153	0.266342	0.559755
AT1G16320	500.711	-0.571773	0.444409	-1.28659	0.198237	0.475621
AT1G16330	16.5493	0.860073	1.20211	0.715473	0.474317	0.745039
AT1G16340	131.225	0.0444964	0.475131	0.0936508	0.925387	0.972213
AT1G16350	466.526	0.908189	0.45435	1.99887	0.045622	0.204911
AT1G16370	5.63669	2.31014	2.74127	0.842728	0.39938	0.685077
AT1G16390	152.938	2.31136	0.588193	3.92959	8.51e-05	0.00234346
AT1G16400	178.171	4.55827	0.563301	8.09208	5.87e-16	7.85e-13
AT1G16410	241.879	3.36579	0.677502	4.96794	6.77e-07	5.27e-05
AT1G16420	1.95306	3.9849	4.4295	0.899627	0.368319	NA
AT1G16430	32.7736	-0.837953	0.866621	-0.966921	0.333584	0.628388
AT1G16440	4.79113	-2.49921	2.77699	-0.899971	0.368136	0.65921
AT1G16445	20.9493	-0.781136	1.26345	-0.618259	0.536405	0.785949
AT1G16460	784.95	0.0223906	0.349129	0.0641327	0.948865	0.981926
AT1G16470	1238.21	-0.778851	0.274452	-2.83785	0.0045419	0.0458
AT1G16480	22.4216	-0.0565354	1.12153	-0.0504092	0.959796	0.985266
AT1G16490	35.3213	8.16426	1.68698	4.83958	1.3e-06	8.62e-05
AT1G16500	288.613	-0.0717372	0.412362	-0.173967	0.861892	0.95035
AT1G16510	308.623	0.310249	0.333834	0.929353	0.352706	0.64622
AT1G16520	282.36	0.760441	0.371291	2.0481	0.0405505	0.189863
AT1G16530	6.82403	0.045421	1.73232	0.0262197	0.979082	0.991583
AT1G16540	639.255	-0.19112	0.304483	-0.627687	0.530209	0.782325
AT1G16560	720.297	-0.199475	0.322957	-0.617652	0.536805	0.7861
AT1G16570	240.852	0.0852114	0.372647	0.228665	0.819129	0.933542
AT1G16590	161.193	-0.45925	0.444555	-1.03305	0.301578	0.595944
AT1G16610	1170.95	-0.0514699	0.233288	-0.220628	0.825382	0.936014
AT1G16630	58.7697	2.73825	0.855779	3.19972	0.0013756	0.0193539
AT1G16640	6.18847	5.64864	3.0922	1.82674	0.0677394	0.258753
AT1G16650	187.531	-0.148125	0.414821	-0.357082	0.72103	0.889415
AT1G16670	282.621	0.239563	0.33347	0.718394	0.472514	0.743586
AT1G16680	257.875	0.695101	0.346892	2.0038	0.0450918	0.203486
AT1G16690	115.495	0.334822	0.502092	0.666855	0.504865	0.764989
AT1G16700	1333.9	0.0887022	0.282783	0.313676	0.753767	0.904782
AT1G16705	2082.05	-0.715664	0.29528	-2.42368	0.0153641	0.102959
AT1G16710	1255.93	-0.68028	0.281939	-2.41286	0.0158277	0.105087
AT1G16720	795.823	0.00180612	0.3432	0.00526258	0.995801	0.99865
AT1G16730	11.1966	-0.101567	1.77258	-0.0572988	0.954307	0.983448
AT1G16740	629.549	0.145028	0.320465	0.452554	0.65087	0.853614
AT1G16750	29.9929	2.29964	1.02572	2.24197	0.0249634	0.140966
AT1G16760	3.02103	4.62316	3.25928	1.41846	0.156057	NA
AT1G16770	6.89526	-0.490012	2.09373	-0.234037	0.814956	0.931445
AT1G16780	100.308	0.224718	0.56892	0.394991	0.692849	0.876894
AT1G16790	274.37	0.0260557	0.377344	0.0690503	0.94495	0.980462
AT1G16800	188.907	-1.53805	0.595651	-2.58214	0.00981892	0.0774789
AT1G16810	605.312	0.0660144	0.272495	0.242259	0.80858	0.92854
AT1G16820	18.6139	-1.16459	1.4001	-0.831789	0.405528	0.68969
AT1G16825	105.517	0.923567	0.610057	1.5139	0.130051	0.376441
AT1G16830	18.6922	0.988901	1.78079	0.555315	0.57868	0.812071
AT1G16840	777.168	-0.698463	0.249134	-2.80356	0.00505418	0.049187
AT1G16850	41.9643	-1.69159	0.992406	-1.70454	0.0882807	0.302769
AT1G16858	235.996	-0.540236	0.487181	-1.1089	0.267473	0.560792
AT1G16860	245.646	-0.721181	0.497132	-1.45068	0.146868	0.403872
AT1G16870	326.591	0.791563	0.38398	2.06147	0.0392582	0.1863
AT1G16880	1257.96	-0.25907	0.325228	-0.796582	0.425694	0.707037
AT1G16890	4410.2	-0.370594	0.253498	-1.46192	0.143763	0.398335
AT1G16900	864.683	-0.447915	0.271757	-1.64822	0.099308	0.323565
AT1G16905	17.2521	-1.30743	1.56687	-0.834423	0.404043	0.689207
AT1G16916	46.2564	0.000580096	0.750349	0.000773102	0.999383	0.999782
AT1G16920	340.894	0.565113	0.398303	1.4188	0.155957	0.418155
AT1G16930	63.1714	0.922639	1.0351	0.891356	0.372738	0.663016
AT1G16950	3274.06	-0.518703	0.351463	-1.47584	0.139987	0.392277
AT1G16960	210.318	0.201209	0.404518	0.497406	0.618903	0.836576
AT1G16970	200.055	0.390825	0.470403	0.830829	0.40607	0.690144
AT1G17010	9.71054	1.79118	1.96859	0.909877	0.362887	0.65459
AT1G17020	2481.11	-0.775179	0.321076	-2.41432	0.0157646	0.104838
AT1G17030	6184.31	-0.2278	0.266399	-0.85511	0.39249	0.679291
AT1G17040	187.223	0.267216	0.468635	0.5702	0.568542	0.806233
AT1G17050	304.431	-0.183155	0.478318	-0.382914	0.701783	0.882188
AT1G17060	167.863	0.795373	0.453447	1.75406	0.0794204	0.284838
AT1G17070	283.373	-0.282754	0.393904	-0.717825	0.472865	0.743963
AT1G17080	1286.09	-0.646539	0.240674	-2.68636	0.0072235	0.0635522
AT1G17090	11.0782	2.28267	2.18475	1.04482	0.296106	0.590652
AT1G17100	478.288	0.0449951	0.319674	0.140753	0.888065	0.96018
AT1G17110	910.593	0.152127	0.30196	0.503798	0.614403	0.834833
AT1G17120	629.397	-0.496187	0.258363	-1.92051	0.0547939	0.228561
AT1G17130	526.961	0.703275	0.320786	2.19235	0.0283541	0.152496
AT1G17140	147.694	1.40547	0.459998	3.05538	0.00224778	0.0276875
AT1G17145	287.885	-0.259283	0.429001	-0.604387	0.545586	0.791226
AT1G17147	3.17468	-1.85447	3.15269	-0.58822	0.556385	NA
AT1G17160	409.034	-0.309369	0.348945	-0.886583	0.375303	0.665339
AT1G17170	612.802	0.32162	0.299368	1.07433	0.282676	0.577166
AT1G17180	5.82472	5.56084	3.03101	1.83465	0.0665575	0.255727
AT1G17190	81.672	-0.264697	0.614092	-0.431038	0.666441	0.862956
AT1G17200	2211.33	-0.136014	0.267766	-0.507959	0.611482	0.832784
AT1G17210	1901.58	0.327244	0.277152	1.18074	0.237707	0.526145
AT1G17220	1297.78	0.510065	0.280469	1.81861	0.0689707	0.261565
AT1G17230	210.716	1.17274	0.47377	2.47533	0.0133113	0.0938054
AT1G17240	3.33008	-5.63892	3.96159	-1.4234	0.154621	NA
AT1G17250	61.3553	-0.792365	0.717704	-1.10403	0.269581	0.562636
AT1G17260	766.232	-1.81848	0.354633	-5.12777	2.93e-07	2.63e-05
AT1G17270	70.6959	-0.184703	0.712235	-0.259329	0.795382	0.922833
AT1G17280	1070.15	-0.201358	0.231433	-0.870051	0.384273	0.672572
AT1G17290	4167.76	-0.301869	0.240352	-1.25594	0.209136	0.489146
AT1G17310	41.3124	-0.60274	0.99015	-0.608736	0.5427	0.789465
AT1G17330	201.848	0.459977	0.482466	0.953389	0.340393	0.635005
AT1G17340	294.837	-0.724479	0.469868	-1.54188	0.123103	0.36418
AT1G17350	143.911	0.237837	0.508163	0.468032	0.639762	0.847014
AT1G17360	131.674	1.54757	0.680083	2.27557	0.0228719	0.133449
AT1G17370	1353.33	-0.225857	0.229178	-0.985508	0.324375	0.619174
AT1G17380	162.652	0.639303	0.622381	1.02719	0.304331	0.598556
AT1G17400	28.6531	-0.319084	1.26244	-0.252752	0.80046	0.924993
AT1G17410	39.2316	-0.986754	0.771904	-1.27834	0.20113	0.479391
AT1G17420	268.464	0.507824	0.494777	1.02637	0.304718	0.598887
AT1G17430	54.7426	0.127655	0.737625	0.173063	0.862602	0.95059
AT1G17440	639.62	0.359735	0.296744	1.21227	0.225407	0.510895
AT1G17450	409.533	-0.120348	0.298758	-0.402828	0.687075	0.873805
AT1G17455	54.5779	-0.31839	0.646816	-0.492242	0.622549	0.838965
AT1G17460	106.804	0.315671	0.599165	0.526851	0.598297	0.82343
AT1G17470	670.899	0.173012	0.262941	0.657987	0.510546	0.769133
AT1G17480	143.125	-0.0610689	0.459444	-0.132919	0.894258	0.96311
AT1G17490	113.346	-0.445196	0.596377	-0.7465	0.455365	0.729891
AT1G17500	578.282	-0.0529334	0.285381	-0.185483	0.85285	0.946627
AT1G17510	139.129	0.283664	0.51477	0.55105	0.5816	0.813316
AT1G17520	342.363	0.131815	0.47272	0.278844	0.780365	0.917294
AT1G17530	1354.09	-0.27958	0.255655	-1.09358	0.274138	0.567467
AT1G17540	54.457	3.07447	1.20261	2.55651	0.0105729	0.0815174
AT1G17550	1082.27	-0.248132	0.341507	-0.72658	0.467483	0.739844
AT1G17560	55.2152	0.528452	0.83521	0.632718	0.526918	0.780092
AT1G17580	846.136	-0.698561	0.316602	-2.20644	0.0273536	0.149152
AT1G17590	218.785	0.486888	0.427553	1.13878	0.254796	0.546353
AT1G17620	9476.19	-0.7592	0.256563	-2.95912	0.00308517	0.0349554
AT1G17630	25.8328	-1.64788	1.57812	-1.04421	0.29639	0.591044
AT1G17640	170.649	0.115596	0.455663	0.253688	0.799737	0.924583
AT1G17650	61.669	0.318936	0.786835	0.40534	0.685227	0.873218
AT1G17665	17.3831	0.49137	1.38534	0.354693	0.72282	0.890351
AT1G17680	532.522	-0.0108738	0.272948	-0.0398385	0.968222	0.988277
AT1G17690	193.88	0.288281	0.38164	0.755374	0.450025	0.725554
AT1G17710	150.186	-0.747149	0.729149	-1.02469	0.305511	0.599645
AT1G17720	1220.77	0.125247	0.226633	0.552642	0.580509	0.813036
AT1G17730	585.045	-0.199723	0.289881	-0.688981	0.490836	0.756497
AT1G17744	32.2173	-2.33738	1.04434	-2.23815	0.0252115	0.141864
AT1G17745	11213.7	-0.631409	0.214909	-2.93803	0.00330305	0.0366868
AT1G17750	75.5731	0.38995	0.653009	0.597159	0.550401	0.792996
AT1G17760	396.36	0.264106	0.294603	0.896481	0.369996	0.660686
AT1G17770	4.11675	5.06091	3.41984	1.47987	0.138908	0.390324
AT1G17780	124.454	-0.219801	0.485101	-0.453104	0.650474	0.853399
AT1G17790	297.556	0.256863	0.386959	0.663799	0.506819	0.76622
AT1G17820	231.694	1.05782	0.385517	2.74389	0.00607164	0.0561235
AT1G17830	15.5275	-0.188425	1.67023	-0.112814	0.910178	0.967786
AT1G17840	6202.37	0.101854	0.243805	0.417768	0.676117	0.868878
AT1G17850	78.6006	1.02486	0.631096	1.62394	0.104389	0.332618
AT1G17860	550.349	-0.247995	0.3622	-0.684692	0.493538	0.758368
AT1G17870	27.6049	-0.68967	1.11814	-0.6168	0.537367	0.786625
AT1G17880	2128.1	-0.20442	0.256713	-0.796299	0.425859	0.707171
AT1G17890	367.78	0.130261	0.317229	0.410621	0.68135	0.871193
AT1G17920	26.4849	-0.124916	1.15936	-0.107745	0.914198	0.968363
AT1G17930	358.309	0.633599	0.417696	1.51689	0.129294	0.375013
AT1G17940	372.055	-1.175	0.336062	-3.49639	0.000471602	0.00865107
AT1G17950	3.16783	-1.82177	2.74783	-0.662984	0.507341	NA
AT1G17960	5.25585	0.963658	1.89391	0.508819	0.610879	0.832233
AT1G17970	36.2676	-0.97579	0.846934	-1.15214	0.249262	0.540012
AT1G17980	608.255	0.815433	0.269564	3.02501	0.00248623	0.0297474
AT1G17990	824.416	0.546587	0.329239	1.66015	0.0968836	0.319083
AT1G18000	116.638	1.30521	0.737611	1.76951	0.0768094	0.27918
AT1G18010	331.359	0.487943	0.440354	1.10807	0.267832	0.561126
AT1G18020	86.1536	-1.65053	3.97739	-0.414978	0.678158	0.869899
AT1G18030	99.531	-0.380779	0.622385	-0.611805	0.540667	0.788191
AT1G18040	214.471	-0.106189	0.39341	-0.269919	0.787222	0.91966
AT1G18060	40.0167	0.591178	0.892257	0.662564	0.50761	0.766781
AT1G18070	1185.39	0.306262	0.246734	1.24126	0.214509	0.496734
AT1G18080	5683.99	-0.216739	0.263454	-0.822682	0.410689	0.69435
AT1G18090	31.6381	1.08375	0.875506	1.23785	0.21577	0.498391
AT1G18100	3.04542	0.189783	2.78974	0.068029	0.945763	NA
AT1G18150	465.373	-0.0755828	0.283599	-0.266513	0.789844	0.920412
AT1G18160	1023.05	0.191056	0.302585	0.631413	0.52777	0.780671
AT1G18170	62.9411	0.646391	0.755765	0.855281	0.392396	0.679291
AT1G18180	136.041	0.102052	0.480485	0.212393	0.8318	0.938891
AT1G18190	362.741	0.677036	0.366311	1.84826	0.0645655	0.250731
AT1G18200	13.0957	0.149776	1.23102	0.121668	0.903162	0.965208
AT1G18210	3918.1	-0.498753	0.2447	-2.03822	0.0415276	0.192747
AT1G18250	67.3874	4.14275	0.775185	5.34421	9.08e-08	9.7e-06
AT1G18260	1145.67	0.100993	0.261189	0.386667	0.699003	0.880656
AT1G18265	4.40597	2.55971	2.59609	0.985986	0.32414	0.618902
AT1G18270	2530.56	0.107935	0.220078	0.490439	0.623823	0.839546
AT1G18280	105.91	-0.264914	0.479754	-0.552187	0.58082	0.813059
AT1G18290	5.13698	0.919328	2.37487	0.387106	0.698678	0.880507
AT1G18300	236.53	0.039828	0.477699	0.0833747	0.933554	0.975129
AT1G18330	128.218	1.0157	0.734718	1.38243	0.166839	0.434226
AT1G18335	55.5817	0.156331	0.796873	0.19618	0.844469	0.943828
AT1G18340	74.5994	-0.0615832	0.606038	-0.101616	0.919061	0.969982
AT1G18350	223.016	0.174665	0.487876	0.358011	0.720335	0.889158
AT1G18360	508.05	-0.368015	0.282573	-1.30237	0.192789	0.468656
AT1G18370	61.4718	1.2512	1.23649	1.01189	0.311589	0.606072
AT1G18390	25.7137	-1.50515	1.46518	-1.02728	0.304287	0.598528
AT1G18400	2.14929	-3.94025	4.09817	-0.961465	0.336319	NA
AT1G18420	20.1438	-1.02886	1.30504	-0.788372	0.430479	0.710634
AT1G18440	74.488	-0.501235	0.576103	-0.870044	0.384277	0.672572
AT1G18450	465.159	-0.0901347	0.315717	-0.285493	0.775267	0.914895
AT1G18460	435.895	0.433421	0.420488	1.03076	0.302655	0.597013
AT1G18470	2451.93	-1.06694	0.26429	-4.03699	5.41e-05	0.00167721
AT1G18480	1513.51	-0.518482	0.275885	-1.87934	0.0601981	0.241865
AT1G18485	15.4024	1.03481	1.88798	0.548107	0.583618	0.814663
AT1G18490	209.302	-0.17686	0.400516	-0.441579	0.658794	0.858256
AT1G18500	415.529	0.343611	0.431084	0.797085	0.425402	0.706844
AT1G18520	9.98348	1.04495	1.84578	0.566129	0.571306	0.807982
AT1G18540	2444.21	0.348861	0.24388	1.43046	0.152585	0.413533
AT1G18550	63.4307	-0.0965619	0.697914	-0.138358	0.889958	0.961351
AT1G18560	93.8114	0.464815	0.641329	0.724768	0.468594	0.740843
AT1G18570	22.4529	2.94563	1.52137	1.93617	0.0528475	0.223513
AT1G18580	384.121	0.432339	0.313604	1.37861	0.168014	0.435213
AT1G18590	232.549	1.59361	0.47062	3.3862	0.000708683	0.0117298
AT1G18600	214.484	-0.786581	0.452032	-1.7401	0.0818413	0.28964
AT1G18610	122.478	0.426649	0.530338	0.804485	0.421117	0.703569
AT1G18620	283.046	0.460962	0.431785	1.06757	0.285713	0.579597
AT1G18630	96.3318	-0.172625	0.616037	-0.280218	0.77931	0.916484
AT1G18640	359.329	0.213392	0.346104	0.616556	0.537528	0.786625
AT1G18650	88.3645	1.76251	0.600077	2.93714	0.00331254	0.0367233
AT1G18660	566.575	-0.325779	0.322826	-1.00915	0.312904	0.607677
AT1G18670	45.919	1.91318	0.764379	2.50293	0.0123171	0.0895332
AT1G18680	213.961	-0.350103	0.413378	-0.846932	0.397033	0.683388
AT1G18690	85.867	-0.559144	0.659162	-0.848265	0.396291	0.682861
AT1G18700	657.552	0.0255353	0.315022	0.0810588	0.935395	0.976119
AT1G18710	44.1463	-2.59518	0.915007	-2.83624	0.00456474	0.0459621
AT1G18720	3989.06	-0.691449	0.266002	-2.59941	0.00933847	0.0753874
AT1G18730	223.389	0.608152	0.455104	1.33629	0.181453	0.455216
AT1G18740	471.677	0.863761	0.365829	2.36111	0.0182206	0.115654
AT1G18750	51.449	0.336394	0.914956	0.367661	0.713126	0.886364
AT1G18760	3.3118	-0.411497	3.61687	-0.113772	0.909419	NA
AT1G18800	376.005	0.210786	0.356785	0.590793	0.554659	0.79634
AT1G18830	22.1524	-0.374762	1.06647	-0.351405	0.725284	0.891717
AT1G18835	14.1691	0.638876	1.36547	0.467881	0.63987	0.847014
AT1G18840	212.906	2.20995	0.469981	4.70221	2.57e-06	0.000149769
AT1G18850	149.452	0.17271	0.526247	0.328191	0.742767	0.900243
AT1G18870	78.1876	-1.16808	0.596933	-1.95681	0.0503702	0.216967
AT1G18880	1511.31	-0.243568	0.236904	-1.02813	0.303889	0.598232
AT1G18890	1209.64	-0.0249026	0.235602	-0.105698	0.915822	0.968915
AT1G18900	311.529	-0.463361	0.341345	-1.35746	0.174636	0.444944
AT1G18910	9.86431	0.694599	1.99102	0.348866	0.72719	0.892571
AT1G18940	2.01015	4.03526	4.30191	0.938016	0.348236	NA
AT1G18950	307.11	0.534881	0.381843	1.40079	0.161277	0.426016
AT1G18980	5.03536	-5.22973	3.08509	-1.69517	0.0900438	0.306668
AT1G18990	47.9461	3.25588	1.30559	2.4938	0.0126385	0.0906547
AT1G19000	1169.44	0.380701	0.284654	1.33741	0.181088	0.454519
AT1G19010	89.0567	0.143692	0.58703	0.244777	0.806629	0.927901
AT1G19020	149.407	-1.33006	0.542858	-2.45011	0.0142811	0.0984258
AT1G19025	29.8904	0.455121	1.5539	0.292889	0.769607	0.912377
AT1G19050	8.66884	2.52841	1.97085	1.28291	0.199525	0.477173
AT1G19080	79.9537	0.401255	0.658305	0.609528	0.542174	0.789265
AT1G19090	1.66361	3.76412	4.43315	0.849084	0.395835	NA
AT1G19100	268.196	-0.28268	0.349736	-0.808267	0.418937	0.701384
AT1G19110	578.29	0.77119	0.390512	1.97482	0.0482888	0.211783
AT1G19115	6.71113	-6.64977	2.5091	-2.65026	0.00804302	0.0680774
AT1G19120	386.822	0.31111	0.332617	0.935341	0.349613	0.643828
AT1G19130	447.605	-0.455547	0.28388	-1.60472	0.108556	0.339908
AT1G19140	298.369	-0.0993213	0.453171	-0.21917	0.826518	0.936297
AT1G19150	22.5988	0.0274546	0.973288	0.0282081	0.977496	0.990976
AT1G19160	6.44786	-4.25363	2.84358	-1.49587	0.134687	0.383834
AT1G19170	268.744	-0.109433	0.345655	-0.316596	0.75155	0.90413
AT1G19180	2030.97	-0.036742	0.316773	-0.115988	0.907662	0.966795
AT1G19190	1320.01	-1.71663	0.294997	-5.81914	5.92e-09	9.87e-07
AT1G19200	673.334	-0.67605	0.374332	-1.80602	0.0709157	0.265892
AT1G19210	12.2802	1.76304	1.64994	1.06855	0.285274	0.579278
AT1G19220	293.757	0.266834	0.345684	0.771901	0.440173	0.718815
AT1G19230	63.9073	0.565541	0.690501	0.819029	0.41277	0.696109
AT1G19240	82.5889	-1.26514	0.549429	-2.30264	0.0212993	0.127917
AT1G19270	328.452	-0.0650549	0.345464	-0.188312	0.850632	0.946367
AT1G19290	51.2635	1.66063	0.765587	2.1691	0.0300753	0.158442
AT1G19300	300.627	0.0600955	0.411855	0.145914	0.883989	0.958505
AT1G19310	394.764	-1.1196	0.36542	-3.06387	0.00218492	0.0270949
AT1G19320	4.99548	5.33939	2.71689	1.96526	0.0493845	0.214402
AT1G19330	2924.32	-0.0695662	0.210596	-0.33033	0.741151	0.899171
AT1G19340	226.633	-0.465106	0.384314	-1.21022	0.226193	0.512077
AT1G19350	1563.38	-0.0266566	0.228695	-0.11656	0.907209	0.966623
AT1G19360	877.495	0.321309	0.253663	1.26668	0.205271	0.483997
AT1G19370	451.303	0.842784	0.513146	1.64239	0.10051	0.32551
AT1G19380	472.276	-1.00971	0.323342	-3.12273	0.00179185	0.0235438
AT1G19396	46.579	-1.53142	0.852274	-1.79686	0.0723574	0.26911
AT1G19397	156.307	-1.22351	0.521215	-2.34741	0.0189043	0.118226
AT1G19400	635.18	-0.210519	0.303263	-0.694179	0.48757	0.754386
AT1G19430	884.914	-0.0703513	0.295384	-0.238169	0.81175	0.930011
AT1G19440	402.172	0.488584	0.391918	1.24665	0.212526	0.494066
AT1G19450	322.793	-0.680768	0.409334	-1.66311	0.0962902	0.318173
AT1G19460	22.2704	0.500846	1.06453	0.470484	0.638009	0.846281
AT1G19480	300.525	-0.203864	0.364717	-0.558966	0.576185	0.81077
AT1G19485	277.536	-0.457302	0.357038	-1.28082	0.200255	0.47835
AT1G19490	67.1037	-0.0669773	0.748423	-0.0894912	0.928692	0.972748
AT1G19500	13.4254	3.66856	1.50321	2.44048	0.0146677	0.100164
AT1G19510	4.99177	5.3372	2.84791	1.87408	0.0609197	0.243599
AT1G19520	483.478	1.33042	0.367775	3.61749	0.000297476	0.00614447
AT1G19530	88.1051	0.758538	0.735013	1.03201	0.302069	0.596502
AT1G19540	77.0098	1.02947	0.608994	1.69045	0.0909425	0.308317
AT1G19570	2535.48	0.582651	0.275193	2.11725	0.034239	0.171109
AT1G19580	780.057	-0.259621	0.319065	-0.813692	0.415822	0.698556
AT1G19600	456.431	-0.1309	0.317403	-0.412411	0.680038	0.870665
AT1G19610	117.108	0.40061	0.603104	0.664248	0.506532	0.766173
AT1G19630	8.06678	-0.723286	2.53351	-0.285488	0.77527	0.914895
AT1G19640	1.98907	2.40928	3.78658	0.636268	0.524602	NA
AT1G19650	162.429	0.661951	0.477632	1.3859	0.165777	0.432865
AT1G19660	3256.1	-0.179557	0.336574	-0.533485	0.593698	0.820462
AT1G19670	169.52	-0.0505533	0.477358	-0.105902	0.91566	0.968889
AT1G19680	446.107	0.360487	0.374254	0.963213	0.335441	0.630093
AT1G19690	59.543	1.75289	0.760331	2.30543	0.0211424	0.12742
AT1G19700	1224.01	0.167925	0.286119	0.586909	0.557265	0.797563
AT1G19710	122.83	0.751966	0.465491	1.61542	0.106219	0.335888
AT1G19715	539.327	0.268276	0.297694	0.90118	0.367492	0.658628
AT1G19720	280.21	0.178995	0.430656	0.415633	0.677679	0.869711
AT1G19730	572.798	-0.475372	0.362935	-1.3098	0.190264	0.465784
AT1G19740	825.363	-0.36302	0.285556	-1.27128	0.20363	0.482167
AT1G19750	6.72727	0.640501	1.70893	0.374796	0.707812	0.884586
AT1G19770	5093.17	-0.272396	0.328854	-0.828319	0.40749	0.691445
AT1G19780	3.65338	4.8883	4.1093	1.18957	0.234215	NA
AT1G19790	70.7592	0.110732	0.592017	0.187041	0.851628	0.946627
AT1G19800	476.184	-0.570786	0.346933	-1.64523	0.0999215	0.324511
AT1G19830	5.41667	5.45748	2.5552	2.13583	0.0326932	0.167018
AT1G19835	781.837	1.88191	0.3112	6.04727	1.47e-09	3.05e-07
AT1G19840	8.78043	-0.335221	1.51501	-0.221267	0.824885	0.935979
AT1G19850	9152.82	-0.28313	0.241086	-1.1744	0.240237	0.529508
AT1G19860	437.584	0.258528	0.343727	0.752132	0.451971	0.727194
AT1G19870	868.701	0.785582	0.37053	2.12016	0.0339929	0.170594
AT1G19880	1164.04	0.442231	0.289175	1.52928	0.126194	0.370032
AT1G19900	10483.7	-0.467996	0.295972	-1.58122	0.113828	0.348479
AT1G19910	3859.18	-0.705793	0.228193	-3.09296	0.00198169	0.0253018
AT1G19920	780.273	0.305561	0.319541	0.956249	0.338946	0.633774
AT1G19940	124.224	-0.152965	0.484361	-0.315809	0.752148	0.90419
AT1G19950	66.6532	1.7317	0.673819	2.56998	0.0101704	0.0792977
AT1G19960	81.5033	0.199483	0.737243	0.27058	0.786714	0.91954
AT1G19970	651.959	-0.959202	0.295853	-3.24216	0.00118628	0.0173467
AT1G19980	94.8887	0.544791	0.92335	0.590016	0.55518	0.796509
AT1G19990	79.7852	2.62147	0.645282	4.06252	4.85e-05	0.00153733
AT1G20010	667.903	1.4624	0.334435	4.37273	1.23e-05	0.000528643
AT1G20020	686.935	1.29677	0.3875	3.3465	0.0008184	0.0129697
AT1G20030	749.851	-0.607809	0.384817	-1.57947	0.114228	0.348904
AT1G20050	978.53	-0.272558	0.291915	-0.93369	0.350464	0.644405
AT1G20060	13.8913	1.08023	1.78458	0.605312	0.544972	0.790507
AT1G20070	149.708	0.386013	0.45467	0.848997	0.395883	0.682817
AT1G20080	23.6085	2.68165	1.36248	1.96821	0.0490436	0.213868
AT1G20090	1197.55	-0.439449	0.297997	-1.47468	0.140299	0.392786
AT1G20100	499.006	0.115164	0.345189	0.333627	0.738661	0.898056
AT1G20110	2974.5	-0.201006	0.217968	-0.922182	0.356433	0.649662
AT1G20120	155.813	-0.421913	0.629192	-0.670563	0.502499	0.763601
AT1G20140	388.758	-0.349349	0.379219	-0.921234	0.356928	0.649913
AT1G20160	112.702	2.60292	0.548046	4.74946	2.04e-06	0.000125229
AT1G20180	659.469	-0.0157907	0.419217	-0.037667	0.969953	0.988565
AT1G20190	6.72901	0.00554639	2.25341	0.00246133	0.998036	0.99928
AT1G20200	2294.75	0.24078	0.211834	1.13664	0.255688	0.547392
AT1G20220	1293.9	0.306295	0.266143	1.15087	0.249787	0.540609
AT1G20225	638.631	-1.03428	0.37959	-2.72473	0.00643538	0.058463
AT1G20230	24.291	-0.663534	0.991872	-0.668971	0.503514	0.764125
AT1G20260	1995.68	0.0947623	0.204759	0.462798	0.643509	0.849059
AT1G20270	240.368	-0.10851	0.449668	-0.241311	0.809314	0.928783
AT1G20300	180.29	0.591818	0.460333	1.28563	0.198572	0.475957
AT1G20310	10.7209	-0.46669	1.36329	-0.342326	0.732106	0.894819
AT1G20320	5.98001	-1.14227	2.68843	-0.424885	0.670921	0.866131
AT1G20330	4093.32	1.02619	0.267075	3.84233	0.00012187	0.00310504
AT1G20340	3475.4	0.465928	0.225185	2.06909	0.0385376	0.183956
AT1G20350	1326.14	-0.772863	0.274342	-2.81715	0.00484516	0.0476505
AT1G20370	155.996	1.71984	0.6003	2.86497	0.00417053	0.0431176
AT1G20380	367.85	0.236479	0.385031	0.614181	0.539096	0.787484
AT1G20410	150.151	0.32083	0.474888	0.675592	0.4993	0.761389
AT1G20430	147.029	0.785192	0.45206	1.73692	0.0824014	0.290636
AT1G20440	10379.1	0.218163	0.210639	1.03572	0.300333	0.595005
AT1G20450	1921.3	0.721471	0.249704	2.88931	0.0038609	0.0409484
AT1G20460	14.6492	-1.40631	1.34427	-1.04615	0.295493	0.590074
AT1G20470	25.3006	-2.44027	1.10797	-2.20247	0.0276322	0.150222
AT1G20480	63.9713	1.27034	0.821913	1.54559	0.122203	0.362727
AT1G20490	31.2631	-0.675438	1.03394	-0.653267	0.513584	0.771481
AT1G20500	2.98321	4.59527	3.6844	1.24722	0.212315	NA
AT1G20510	197.24	0.980468	0.44286	2.21395	0.0268325	0.147567
AT1G20530	16.8071	0.508496	1.13299	0.448808	0.65357	0.855225
AT1G20540	144.081	-0.286567	0.509594	-0.562343	0.573882	0.809457
AT1G20550	383.515	-0.143854	0.466707	-0.308233	0.757905	0.906649
AT1G20560	489.318	0.256636	0.347826	0.737829	0.460619	0.73406
AT1G20570	5.41858	2.89551	2.69041	1.07623	0.281822	0.57648
AT1G20575	375.772	-0.399503	0.389565	-1.02551	0.305122	0.59921
AT1G20580	671.941	0.0200244	0.283176	0.0707135	0.943626	0.979737
AT1G20610	43.6495	0.667202	0.849792	0.785136	0.432374	0.71218
AT1G20620	87621.5	-0.744515	0.201637	-3.69235	0.000222191	0.00491661
AT1G20630	12933	-0.454903	0.205798	-2.21043	0.0270754	0.148183
AT1G20640	533.268	0.855372	0.292111	2.92825	0.0034088	0.0374923
AT1G20650	539.718	-0.306621	0.449228	-0.68255	0.494891	0.759066
AT1G20670	466.795	0.510657	0.374216	1.3646	0.172378	0.441693
AT1G20680	535.892	-1.33934	0.352421	-3.80039	0.00014447	0.00352826
AT1G20690	51.8556	-0.2061	0.756796	-0.272333	0.785366	0.919137
AT1G20693	5580.86	0.097729	0.220593	0.443028	0.657746	0.857865
AT1G20696	5998.36	-0.61479	0.243749	-2.52223	0.0116615	0.0864895
AT1G20700	143.057	-1.75971	0.573417	-3.06882	0.00214907	0.0267827
AT1G20710	2.34368	4.24836	4.42582	0.959903	0.337104	NA
AT1G20720	23.27	-0.135648	1.00272	-0.13528	0.89239	0.962477
AT1G20730	1696.57	-1.47649	0.440644	-3.35076	0.000805893	0.012831
AT1G20735	7.84774	-6.87546	2.96622	-2.31792	0.0204535	0.124665
AT1G20740	30.945	-1.56213	1.05706	-1.4778	0.13946	0.391327
AT1G20750	7.12844	-5.73493	2.27222	-2.52393	0.0116051	0.0861668
AT1G20760	1253.5	-0.213909	0.244717	-0.874109	0.382059	0.671128
AT1G20770	270.15	-0.0577078	0.352488	-0.163715	0.869955	0.953455
AT1G20780	376.48	-0.0680361	0.309129	-0.22009	0.825801	0.936119
AT1G20790	4.49664	0.671753	2.50377	0.268297	0.788471	0.920162
AT1G20795	11.0029	-0.154429	1.33101	-0.116024	0.907634	0.966795
AT1G20800	2.67507	2.8662	3.48823	0.821676	0.411261	NA
AT1G20810	186.815	-0.807312	0.476025	-1.69595	0.0898962	0.306322
AT1G20816	29.1956	-1.00955	0.868742	-1.16208	0.245204	0.534889
AT1G20823	337.835	-0.301014	0.413048	-0.728762	0.466147	0.738778
AT1G20830	103.659	-0.290549	0.686764	-0.423069	0.672245	0.866893
AT1G20840	922.197	-0.502027	0.338513	-1.48303	0.138065	0.389372
AT1G20850	504.348	1.1088	0.31291	3.54353	0.00039481	0.00762173
AT1G20870	17.9841	2.22863	1.35132	1.64923	0.0991007	0.323257
AT1G20880	1050.83	-0.739481	0.261198	-2.83111	0.0046387	0.0463307
AT1G20890	115.022	-1.31118	0.583147	-2.24845	0.0245475	0.139413
AT1G20900	2.76634	4.4957	3.88092	1.15841	0.246696	NA
AT1G20910	227.778	-0.31461	0.418445	-0.751857	0.452137	0.727194
AT1G20920	2170.09	-0.478355	0.27344	-1.7494	0.0802222	0.286333
AT1G20930	117.016	0.655042	0.478206	1.36979	0.170752	0.439073
AT1G20940	2.43558	4.3026	4.42514	0.972308	0.330897	NA
AT1G20950	274.687	-0.121588	0.387913	-0.313441	0.753946	0.904827
AT1G20960	5355.07	-0.469979	0.216875	-2.16705	0.0302309	0.158801
AT1G20970	4477.3	-0.249839	0.242764	-1.02914	0.303412	0.597806
AT1G20980	2521.24	-0.230909	0.204569	-1.12875	0.259001	0.551437
AT1G20990	3.00035	4.60522	3.24931	1.4173	0.156397	NA
AT1G21000	3673.04	-0.534134	0.249624	-2.13976	0.0323743	0.165938
AT1G21010	79.8525	0.608153	0.559479	1.087	0.277038	0.57088
AT1G21050	479.313	3.09355	0.466103	6.63706	3.2e-11	1.05e-08
AT1G21060	129.227	-0.0205676	0.505624	-0.0406777	0.967553	0.98812
AT1G21065	718.138	-0.695906	0.26978	-2.57953	0.00989339	0.0778411
AT1G21070	94.0659	-0.0627716	0.522575	-0.12012	0.904388	0.965815
AT1G21080	932.09	0.193229	0.272448	0.709231	0.478181	0.747748
AT1G21090	113.142	0.969306	0.503305	1.92588	0.0541192	0.226938
AT1G21100	2.11732	4.11037	4.42767	0.928337	0.353233	NA
AT1G21110	4.2602	-5.99407	3.62358	-1.65419	0.0980897	0.321474
AT1G21120	19.8452	1.29239	1.74005	0.742732	0.457644	0.731597
AT1G21140	581.741	-1.05734	0.371583	-2.84549	0.00443428	0.0450736
AT1G21150	38.3302	-0.346325	0.842036	-0.411295	0.680856	0.870911
AT1G21160	351.482	-0.315815	0.336539	-0.938419	0.348029	0.642472
AT1G21170	521.37	0.0179989	0.317715	0.0566512	0.954823	0.983582
AT1G21190	368.32	-0.478554	0.35405	-1.35166	0.176486	0.447695
AT1G21200	202.006	0.243764	0.468144	0.520703	0.602574	0.826357
AT1G21250	16.1531	0.693358	1.74969	0.396275	0.691902	0.876203
AT1G21270	4.06546	-1.56169	2.9473	-0.529873	0.5962	0.821898
AT1G21280	296.718	-0.787059	0.335956	-2.34275	0.0191424	0.11928
AT1G21310	158.235	0.109614	0.450233	0.24346	0.807649	0.928129
AT1G21350	68.4849	0.221226	0.799902	0.276566	0.782114	0.918178
AT1G21360	17.4185	-1.517	1.27181	-1.19279	0.232952	0.520763
AT1G21370	532.28	-0.184346	0.321425	-0.573527	0.566288	0.804446
AT1G21380	1747.03	0.285332	0.217843	1.30981	0.19026	0.465784
AT1G21390	173.657	0.430366	0.466883	0.921786	0.35664	0.649662
AT1G21400	3373.63	-0.177406	0.242686	-0.73101	0.464773	0.737639
AT1G21410	2021.92	-0.528069	0.264919	-1.99332	0.0462261	0.206792
AT1G21440	2107.79	1.02474	0.273632	3.74498	0.000180412	0.00417295
AT1G21450	1208.69	0.44871	0.226604	1.98015	0.0476871	0.210467
AT1G21460	4334.43	-0.675004	0.241112	-2.79954	0.00511754	0.0496277
AT1G21480	851.584	-0.0482112	0.242834	-0.198536	0.842626	0.943333
AT1G21475	96.886	-1.06008	0.746791	-1.41952	0.155748	0.417875
AT1G21500	219.28	0.12243	0.393185	0.311379	0.755512	0.905521
AT1G21510	43.8456	2.32907	0.83481	2.78995	0.00527169	0.0507702
AT1G21520	2461.03	-0.820413	0.405863	-2.0214	0.043238	0.197833
AT1G21530	2.23262	4.17677	4.42676	0.943527	0.345411	NA
AT1G21560	203.08	0.437741	0.41704	1.04964	0.293885	0.588268
AT1G21580	2290.05	-0.861829	0.269503	-3.19784	0.0013846	0.0194396
AT1G21590	285.921	-0.336824	0.384758	-0.875418	0.381346	0.670839
AT1G21600	180.939	-0.131857	0.486105	-0.271252	0.786197	0.919467
AT1G21610	307.488	0.530282	0.340517	1.55729	0.119403	0.357958
AT1G21630	1992.21	-0.360654	0.225977	-1.59597	0.110495	0.343675
AT1G21640	627.177	0.577413	0.340551	1.69553	0.0899757	0.306528
AT1G21650	85.2217	1.62613	0.635271	2.55974	0.0104749	0.0809802
AT1G21651	258.251	-0.134504	0.359116	-0.374542	0.708001	0.884617
AT1G21660	596.911	0.462655	0.2847	1.62506	0.104149	0.332273
AT1G21670	1002.01	-1.19366	0.244412	-4.88382	1.04e-06	7.24e-05
AT1G21680	5113.48	-1.02303	0.245582	-4.16574	3.1e-05	0.00109505
AT1G21690	228.062	-0.584565	0.444026	-1.31651	0.188003	0.463417
AT1G21695	65.8265	-0.317705	0.707102	-0.449306	0.653211	0.854811
AT1G21700	895.589	0.348018	0.272511	1.27708	0.201575	0.479928
AT1G21710	342.766	-0.414596	0.321845	-1.28819	0.197681	0.474797
AT1G21720	1647.34	-0.322893	0.234698	-1.37578	0.16889	0.436533
AT1G21730	270.802	1.14519	0.387361	2.95638	0.00311273	0.0351684
AT1G21740	38.6244	1.84971	0.963529	1.91973	0.0548925	0.228789
AT1G21750	1797.41	0.598436	0.265017	2.2581	0.0239392	0.137401
AT1G21760	463.043	-0.0756124	0.295932	-0.255506	0.798332	0.92401
AT1G21770	593.866	-0.279799	0.458442	-0.610326	0.541646	0.788817
AT1G21780	1617.54	-0.555572	0.358612	-1.54923	0.121327	0.361489
AT1G21790	1072.96	-0.641861	0.344416	-1.86362	0.0623751	0.246371
AT1G21830	202.395	1.47785	0.443593	3.33154	0.000863655	0.0135254
AT1G21840	95.5693	-1.30332	0.621799	-2.09604	0.0360786	0.176764
AT1G21850	12.1992	5.15572	2.86204	1.80141	0.0716375	0.267385
AT1G21860	42.2403	-0.467855	0.765803	-0.610934	0.541243	0.788578
AT1G21880	294.777	0.288761	0.375504	0.768996	0.441895	0.719891
AT1G21890	16.5531	7.06795	2.15542	3.27916	0.00104116	0.0157131
AT1G21900	901.402	0.041699	0.248941	0.167505	0.866972	0.951991
AT1G21910	680.724	-0.811273	0.386171	-2.10081	0.0356573	0.175372
AT1G21920	1318.23	0.0464615	0.299457	0.155153	0.876701	0.955528
AT1G21930	113.267	0.0704317	0.496998	0.141714	0.887306	0.959726
AT1G21940	3.73722	-3.69421	2.54103	-1.45382	0.145995	NA
AT1G21950	2.73429	4.47106	4.42319	1.01082	0.312101	NA
AT1G21970	254.902	0.41631	0.390938	1.0649	0.286921	0.580931
AT1G21980	960.653	0.0444047	0.238843	0.185916	0.852511	0.946627
AT1G22000	3.16989	-1.36081	3.63893	-0.373959	0.708435	NA
AT1G22015	177.96	-0.823983	0.466296	-1.76708	0.0772144	0.28006
AT1G22020	911.207	-0.330041	0.234195	-1.40926	0.158759	0.422117
AT1G22030	130.905	1.02397	0.486352	2.10541	0.0352553	0.174368
AT1G22040	691.328	-0.0669632	0.306688	-0.218343	0.827162	0.936612
AT1G22050	16.427	-0.366617	1.1412	-0.321255	0.748017	0.902352
AT1G22060	294.676	1.31163	0.385999	3.398	0.000678797	0.0113853
AT1G22065	377.542	1.54833	0.389734	3.97279	7.1e-05	0.00203288
AT1G22070	298.496	-0.345609	0.386025	-0.8953	0.370627	0.661252
AT1G22090	23.372	-0.567758	0.94783	-0.599008	0.549168	0.792676
AT1G22100	10.8208	-0.669598	1.33267	-0.502448	0.615353	0.835267
AT1G22110	126.886	0.215941	0.656438	0.328959	0.742187	0.899812
AT1G22130	3.40482	0.907297	3.08006	0.294572	0.768321	NA
AT1G22140	591.877	-0.715836	0.291249	-2.45781	0.0139786	0.0971625
AT1G22160	1501.91	1.02504	0.273576	3.74682	0.000179092	0.00415543
AT1G22170	95.6004	0.431748	0.623162	0.692834	0.488414	0.755037
AT1G22180	88.5763	0.932115	0.639874	1.45672	0.145195	0.400818
AT1G22190	589.347	-1.50463	0.475301	-3.16565	0.00154739	0.0211197
AT1G22200	792.218	0.356039	0.283648	1.25521	0.209401	0.48948
AT1G22210	34.4485	0.741872	0.996081	0.744791	0.456398	0.730788
AT1G22230	16.8456	0.42135	1.26676	0.332621	0.739421	0.898444
AT1G22240	241.866	-0.908997	0.546755	-1.66253	0.0964063	0.318347
AT1G22250	9.20461	-1.07608	1.97277	-0.545469	0.585431	0.815679
AT1G22260	10.4827	-0.637343	2.24159	-0.284326	0.776161	0.915246
AT1G22270	283.535	-0.365703	0.417538	-0.875856	0.381109	0.670599
AT1G22275	24.045	-0.758366	1.15381	-0.657273	0.511006	0.769421
AT1G22280	2007.16	-0.243569	0.222913	-1.09266	0.274541	0.568244
AT1G22300	3093.18	0.19115	0.200519	0.953279	0.340449	0.635005
AT1G22310	227.427	0.700096	0.412198	1.69845	0.0894236	0.305187
AT1G22330	23.5731	2.37386	1.3798	1.72044	0.0853516	0.297088
AT1G22360	12.5452	3.56018	1.62123	2.19598	0.0280934	0.151779
AT1G22370	20.2517	-1.2106	1.56184	-0.775114	0.438272	0.717701
AT1G22400	10.3188	-3.05518	1.73042	-1.76557	0.0774673	0.280641
AT1G22410	1053.83	-0.142045	0.278418	-0.510187	0.609921	0.831435
AT1G22430	9.64509	-1.02914	1.5592	-0.660043	0.509226	0.768066
AT1G22440	115.938	-0.434297	0.550829	-0.788443	0.430438	0.710634
AT1G22450	1448.11	0.463191	0.2529	1.83152	0.0670229	0.256859
AT1G22460	5.10613	5.37586	3.09886	1.73479	0.0827787	0.291468
AT1G22470	22.7856	1.03752	1.08481	0.956405	0.338868	0.633728
AT1G22480	325.077	0.326962	0.375486	0.87077	0.38388	0.672572
AT1G22490	115.465	1.33347	0.669743	1.99101	0.0464799	0.207327
AT1G22500	20.2086	0.0895778	1.0814	0.0828347	0.933983	0.975425
AT1G22510	214.168	-0.429463	0.386128	-1.11223	0.26604	0.559297
AT1G22520	217.831	-0.162567	0.379943	-0.427871	0.668745	0.86449
AT1G22530	831.689	-0.215385	0.241138	-0.893205	0.371748	0.661899
AT1G22540	170.213	-0.700877	0.417232	-1.67982	0.0929915	0.312258
AT1G22550	15.3195	0.810583	1.44557	0.560735	0.574978	0.809751
AT1G22570	19.3121	-0.507935	1.21935	-0.416562	0.676998	0.86923
AT1G22590	69.0785	0.300172	0.64217	0.467434	0.640189	0.847085
AT1G22610	1971.45	0.275698	0.227185	1.21354	0.224925	0.510261
AT1G22620	430.602	0.0924408	0.325567	0.283938	0.776458	0.915456
AT1G22630	15.734	0.282267	1.25543	0.224838	0.822106	0.934621
AT1G22640	1053.25	-0.713398	0.27661	-2.57908	0.00990644	0.077905
AT1G22650	23.0601	-0.222777	1.43601	-0.155136	0.876714	0.955528
AT1G22660	227.078	0.153379	0.48969	0.313215	0.754117	0.904827
AT1G22670	1.9837	4.00642	4.25129	0.942401	0.345987	NA
AT1G22700	579.586	0.0684648	0.324032	0.21129	0.832661	0.939229
AT1G22710	8363.03	-0.127422	0.204968	-0.621666	0.534161	0.784598
AT1G22730	354.171	-0.203003	0.306241	-0.662884	0.507405	0.766652
AT1G22740	1187.5	-0.797178	0.263906	-3.02069	0.00252199	0.0301035
AT1G22750	564.076	-0.612356	0.298141	-2.05392	0.0399838	0.188093
AT1G22760	25.8704	1.35179	0.963259	1.40335	0.160512	0.42453
AT1G22770	1626.83	-0.190361	0.299496	-0.635606	0.525033	0.779163
AT1G22780	486.067	0.0489475	0.315799	0.154996	0.876825	0.955547
AT1G22790	368.348	-0.185216	0.356748	-0.519177	0.603637	0.827001
AT1G22800	285.459	-0.109647	0.396232	-0.276724	0.781992	0.918178
AT1G22830	92.1254	-0.69952	0.708696	-0.987052	0.323617	0.618452
AT1G22840	1914.01	-0.572396	0.272818	-2.09809	0.0358973	0.176159
AT1G22850	329.538	-0.0240031	0.373663	-0.0642373	0.948781	0.981926
AT1G22860	355.025	-0.523061	0.370553	-1.41157	0.158076	0.420842
AT1G22870	399.622	-0.39741	0.344968	-1.15202	0.249313	0.54002
AT1G22880	132.328	0.260528	0.463535	0.562046	0.574085	0.809573
AT1G22882	672.202	0.0676996	0.336455	0.201214	0.840531	0.942493
AT1G22885	44.1503	1.05105	0.957421	1.09779	0.272296	0.565436
AT1G22890	22.1156	2.28036	1.34864	1.69086	0.0908634	0.308205
AT1G22900	17.7464	-1.25726	1.19916	-1.04845	0.294431	0.588891
AT1G22910	135.112	-0.188634	0.507769	-0.371496	0.710268	0.885612
AT1G22920	759.886	-0.565251	0.33485	-1.68807	0.0913969	0.309387
AT1G22930	11033.8	0.17359	0.288763	0.601151	0.54774	0.792174
AT1G22940	288.665	-0.0758201	0.409122	-0.185324	0.852975	0.946627
AT1G22950	121.36	0.940943	0.494179	1.90405	0.056903	0.233599
AT1G22960	49.2321	1.4205	0.707511	2.00774	0.044671	0.202406
AT1G22970	369.123	-0.937761	0.330401	-2.83825	0.0045362	0.0457885
AT1G22980	58.1564	0.191934	0.829283	0.231446	0.816968	0.932531
AT1G22985	811.141	-0.918743	0.246354	-3.72936	0.000191964	0.00435486
AT1G22990	2480.87	-1.14368	0.345239	-3.31273	0.000923895	0.0142247
AT1G23010	1869.54	-0.512047	0.283557	-1.8058	0.0709502	0.265907
AT1G23020	897.841	0.645721	0.321511	2.00839	0.0446016	0.202274
AT1G23030	553.13	0.332407	0.388199	0.85628	0.391843	0.67891
AT1G23040	13315.6	-0.75535	0.244023	-3.09541	0.0019654	0.0251655
AT1G23050	4636.14	-0.612678	0.228719	-2.67873	0.00739012	0.0644253
AT1G23060	662.388	0.165827	0.30065	0.55156	0.58125	0.813059
AT1G23080	186.568	4.92234	0.601751	8.18002	2.84e-16	4.07e-13
AT1G23090	517.352	-0.203274	0.601995	-0.337667	0.735614	0.896216
AT1G23100	38.3739	-0.864617	0.872684	-0.990757	0.321804	0.616452
AT1G23110	3.67977	4.9042	3.41948	1.4342	0.151516	NA
AT1G23120	431.36	-0.125999	0.399647	-0.315275	0.752553	0.904299
AT1G23130	19.7265	-1.36618	1.28756	-1.06106	0.288661	0.583101
AT1G23140	24.8033	0.017393	1.18267	0.0147066	0.988266	0.995233
AT1G23149	165.125	0.364872	0.543202	0.671706	0.501771	0.763071
AT1G23150	170.802	0.472498	0.579458	0.815414	0.414836	0.697776
AT1G23170	24.3715	-0.619273	1.5046	-0.411586	0.680643	0.870886
AT1G23180	180.324	1.01318	0.476102	2.12808	0.0333308	0.168537
AT1G23190	3366.17	0.243205	0.2226	1.09257	0.274585	0.568275
AT1G23200	4.46501	3.6618	2.65374	1.37987	0.167628	0.434993
AT1G23201	56.5924	-0.617556	0.706627	-0.873949	0.382146	0.671128
AT1G23205	44.2696	-1.05499	0.894255	-1.17974	0.238102	0.526472
AT1G23210	2.97528	-0.720941	2.6894	-0.268067	0.788647	NA
AT1G23220	338.754	-0.525444	0.319997	-1.64203	0.100584	0.325595
AT1G23230	854.196	-0.293807	0.285375	-1.02955	0.303223	0.597665
AT1G23250	3.38073	-0.358336	3.59788	-0.0995964	0.920665	NA
AT1G23260	947.099	-0.643704	0.259834	-2.47737	0.0132354	0.0936321
AT1G23280	138.49	0.35177	0.650356	0.540889	0.588584	0.81739
AT1G23290	2273.72	-0.216743	0.257202	-0.842697	0.399398	0.685077
AT1G23310	3017.75	-0.0369082	0.292041	-0.12638	0.899431	0.964302
AT1G23330	532.757	-0.389439	0.364037	-1.06978	0.284719	0.579074
AT1G23340	63.0066	5.53501	1.07167	5.16485	2.41e-07	2.24e-05
AT1G23350	46.4844	3.45084	1.10671	3.1181	0.00182018	0.0238465
AT1G23360	97.0342	0.490737	0.541532	0.906201	0.364829	0.656804
AT1G23380	4.80439	2.69383	2.3193	1.16148	0.245446	0.535341
AT1G23390	10500	0.0810072	0.225443	0.359325	0.719352	0.888711
AT1G23400	294.52	0.75615	0.380752	1.98594	0.0470399	0.208509
AT1G23410	23.7782	0.378934	1.19808	0.316284	0.751787	0.904156
AT1G23420	17.454	0.958885	1.12118	0.855244	0.392416	0.679291
AT1G23440	3603.46	-0.983393	0.208697	-4.71207	2.45e-06	0.000144373
AT1G23450	13.3898	0.762104	1.44673	0.526778	0.598348	0.82343
AT1G23460	99.3484	1.54283	0.554768	2.78104	0.00541847	0.0517335
AT1G23480	26.0586	5.25545	1.42944	3.67657	0.000236391	0.00514188
AT1G23490	1540.19	-0.261073	0.261002	-1.00027	0.31718	0.612486
AT1G23510	14.035	0.216394	1.89166	0.114394	0.908926	0.967187
AT1G23520	16.382	2.45698	1.55025	1.58489	0.112991	0.346855
AT1G23530	101.296	0.172102	0.604756	0.284581	0.775965	0.915201
AT1G23540	37.9931	0.260417	0.826939	0.314917	0.752825	0.904299
AT1G23550	307.711	0.283486	0.414257	0.684323	0.493771	0.758368
AT1G23560	94.5138	-0.0120236	0.624994	-0.019238	0.984651	0.993909
AT1G23570	7.55904	5.94016	2.30602	2.57594	0.00999689	0.0784807
AT1G23580	3.35085	4.76344	3.57455	1.3326	0.182663	NA
AT1G23710	292.876	0.145582	0.359551	0.404898	0.685552	0.873218
AT1G23730	239.257	0.854038	0.357313	2.39017	0.0168407	0.109776
AT1G23740	451.898	0.518581	0.492832	1.05225	0.292686	0.587246
AT1G23750	51.0967	0.455631	0.714111	0.638039	0.523449	0.77821
AT1G23760	96.5236	0.539021	0.647038	0.833058	0.404812	0.689631
AT1G23770	4.80201	3.77248	2.50519	1.50587	0.132102	0.379863
AT1G23780	1956.6	-0.576136	0.247703	-2.32591	0.0200232	0.1229
AT1G23790	8.55674	2.96978	2.33103	1.27402	0.202655	0.481162
[truncated: 18,889 more rows]

## Sheet: Auxin_BL_Col0_p<0.05_log2>1
Genes upregulated in Col-0 treated with 2,4-D versus 2,4-D and epi-BL (p<0.05, Log2Fold>1)
Name	baseMean	log2FoldChange	lfcSE	stat	pvalue	padj
AT1G01260	304.395	1.0184	0.34027	2.99291	0.00276332	0.0322343
AT1G01310	111.391	4.43096	0.912442	4.85615	1.2e-06	8.15e-05
AT1G01700	16.4749	5.60472	1.9078	2.93779	0.00330559	0.0366868
AT1G01920	105.967	1.99713	0.511651	3.90331	9.49e-05	0.00255367
AT1G01980	220.496	5.33573	1.41074	3.78221	0.000155442	0.00371568
AT1G02190	28.9127	7.87621	1.72298	4.57126	4.85e-06	0.000252811
AT1G02205	2600.17	1.59814	0.332228	4.81038	1.51e-06	9.63e-05
AT1G02290	121.541	1.54876	0.496247	3.12095	0.00180267	0.0236705
AT1G02460	152.7	3.07541	0.681112	4.51528	6.32e-06	0.000309645
AT1G02630	102.49	3.15617	0.764	4.13111	3.61e-05	0.00122225
AT1G02730	384.782	1.15659	0.324295	3.56647	0.000361828	0.00713396
AT1G02790	779.344	3.57651	1.08755	3.28858	0.00100693	0.015269
AT1G02810	59.0949	2.13155	0.666777	3.19679	0.00138966	0.0194833
AT1G02900	18.1585	7.2046	1.90887	3.77427	0.000160479	0.00380395
AT1G03010	152.364	2.92545	0.569734	5.13476	2.83e-07	2.57e-05
AT1G03050	75.576	3.65998	0.964359	3.79525	0.000147497	0.00358511
AT1G03170	787.907	5.68753	0.529685	10.7376	6.78e-27	3.4e-23
AT1G03300	68.0114	2.56012	0.748849	3.41874	0.000629128	0.0108328
AT1G03410	434.743	1.04233	0.369723	2.81922	0.0048141	0.047402
AT1G03800	14.2919	6.86289	2.05266	3.34342	0.000827535	0.0130719
AT1G03820	21.1297	3.92058	1.23954	3.16294	0.00156183	0.0212878
AT1G03920	47.0729	3.23189	0.873461	3.7001	0.000215514	0.00479167
AT1G04240	37.0337	3.3838	1.02409	3.3042	0.000952488	0.014567
AT1G04430	492.785	1.70274	0.387554	4.39355	1.12e-05	0.000490976
AT1G04470	140.3	3.38026	0.924101	3.65788	0.000254305	0.00545154
AT1G04540	81.2282	2.6482	0.651523	4.06463	4.81e-05	0.00153205
AT1G04680	909.626	2.63492	0.482922	5.4562	4.86e-08	5.88e-06
AT1G05260	36.5541	3.36116	0.932729	3.60357	0.000313871	0.00641709
AT1G05370	58.0786	2.58358	0.731833	3.53029	0.000415112	0.00792224
AT1G05460	211.816	1.68116	0.528695	3.17982	0.00147367	0.0203906
AT1G05470	50.7291	2.86657	0.934184	3.06853	0.00215117	0.0267922
AT1G05580	202.784	3.1668	0.826826	3.83007	0.000128107	0.00323931
AT1G06150	254.469	1.32111	0.378054	3.49449	0.000474961	0.00869261
AT1G06149	130.647	2.38968	0.522466	4.57384	4.79e-06	0.000251573
AT1G07390	93.7759	1.61762	0.547243	2.95595	0.00311708	0.0351978
AT1G07570	307.528	1.66145	0.34474	4.81942	1.44e-06	9.35e-05
AT1G07870	400.708	1.18802	0.331131	3.58776	0.000333531	0.00668962
AT1G08090	533.929	1.99518	0.504672	3.95342	7.7e-05	0.00216335
AT1G08130	359.018	1.27421	0.405465	3.1426	0.00167454	0.0223684
AT1G08140	36.5724	4.40225	1.36875	3.21627	0.00129871	0.0185599
AT1G08300	11.8663	6.59399	2.11648	3.11555	0.00183601	0.0239828
AT1G09440	113.286	2.36511	0.743259	3.18208	0.00146223	0.0202603
AT1G09460	849.391	1.70271	0.374774	4.54329	5.54e-06	0.00028079
AT1G09575	260.901	1.39214	0.405501	3.43314	0.000596636	0.0103835
AT1G09810	129.784	1.56711	0.500163	3.13319	0.00172915	0.0228999
AT1G10070	1985.28	1.22499	0.236279	5.1845	2.17e-07	2.05e-05
AT1G10300	23.3988	5.10046	1.4003	3.64241	0.000270101	0.00571424
AT1G10380	286.772	1.94983	0.37198	5.24175	1.59e-07	1.57e-05
AT1G10640	30.2062	3.61222	1.18889	3.03831	0.00237909	0.0287653
AT1G10770	397.633	2.11247	0.613471	3.44346	0.000574315	0.0100879
AT1G10930	86.6612	1.98557	0.577424	3.43867	0.00058459	0.0102237
AT1G11660	351.525	1.39374	0.403359	3.45534	0.000549601	0.00976641
AT1G11670	19.0883	5.81209	1.95409	2.97433	0.00293631	0.0336432
AT1G11860	980.206	1.09891	0.30109	3.64976	0.000262483	0.0055825
AT1G12090	4190.43	1.00408	0.284668	3.5272	0.000419979	0.00795227
AT1G12120	499.652	1.50345	0.428813	3.50606	0.000454788	0.00841547
AT1G12260	77.7729	2.13282	0.700832	3.04327	0.00234023	0.0284757
AT1G12330	431.152	1.74373	0.474201	3.67719	0.00023582	0.00514188
AT1G12370	89.6376	2.72342	0.928393	2.93348	0.00335181	0.0370359
AT1G12380	976.619	2.00047	0.405945	4.92793	8.31e-07	6.05e-05
AT1G12500	666.741	1.56049	0.258175	6.0443	1.5e-09	3.05e-07
AT1G12570	25.951	4.65554	1.23291	3.77606	0.000159326	0.00378554
AT1G12620	76.0422	2.5419	0.636813	3.9916	6.56e-05	0.00191515
AT1G12770	380.133	1.37766	0.386836	3.56136	0.000368943	0.00721957
AT1G12800	250.283	1.21906	0.433515	2.81203	0.00492293	0.0481962
AT1G13130	78.9869	1.8867	0.630977	2.99012	0.00278864	0.0324378
AT1G13250	560.193	2.52966	0.566796	4.46309	8.08e-06	0.000378761
AT1G13710	14.379	6.86742	2.44031	2.81416	0.00489047	0.0479658
AT1G13970	157.769	1.67891	0.598574	2.80485	0.00503401	0.0490946
AT1G14170	170.996	1.6942	0.596322	2.84108	0.0044961	0.0454766
AT1G14420	175.87	6.02031	1.52416	3.94992	7.82e-05	0.00218906
AT1G14440	419.716	5.62396	1.15115	4.88553	1.03e-06	7.22e-05
AT1G14840	114.994	2.73818	0.754691	3.62821	0.00028539	0.00596172
AT1G15260	80.8405	2.73299	0.649006	4.21104	2.54e-05	0.000943369
AT1G15550	482.783	2.568	0.587196	4.37333	1.22e-05	0.000528333
AT1G15910	242.683	1.40366	0.423632	3.3134	0.000921683	0.0142016
AT1G16390	152.938	2.31136	0.588193	3.92959	8.51e-05	0.00234346
AT1G16400	178.171	4.55827	0.563301	8.09208	5.87e-16	7.85e-13
AT1G16410	241.879	3.36579	0.677502	4.96794	6.77e-07	5.27e-05
AT1G16490	35.3213	8.16426	1.68698	4.83958	1.3e-06	8.62e-05
AT1G16630	58.7697	2.73825	0.855779	3.19972	0.0013756	0.0193539
AT1G17140	147.694	1.40547	0.459998	3.05538	0.00224778	0.0276875
AT1G18250	67.3874	4.14275	0.775185	5.34421	9.08e-08	9.7e-06
AT1G18590	232.549	1.59361	0.47062	3.3862	0.000708683	0.0117298
AT1G18650	88.3645	1.76251	0.600077	2.93714	0.00331254	0.0367233
AT1G18840	212.906	2.20995	0.469981	4.70221	2.57e-06	0.000149769
AT1G19520	483.478	1.33042	0.367775	3.61749	0.000297476	0.00614447
AT1G19835	781.837	1.88191	0.3112	6.04727	1.47e-09	3.05e-07
AT1G19990	79.7852	2.62147	0.645282	4.06252	4.85e-05	0.00153733
AT1G20010	667.903	1.4624	0.334435	4.37273	1.23e-05	0.000528643
AT1G20020	686.935	1.29677	0.3875	3.3465	0.0008184	0.0129697
AT1G20160	112.702	2.60292	0.548046	4.74946	2.04e-06	0.000125229
AT1G20330	4093.32	1.02619	0.267075	3.84233	0.00012187	0.00310504
AT1G20370	155.996	1.71984	0.6003	2.86497	0.00417053	0.0431176
AT1G20850	504.348	1.1088	0.31291	3.54353	0.00039481	0.00762173
AT1G21050	479.313	3.09355	0.466103	6.63706	3.2e-11	1.05e-08
AT1G21440	2107.79	1.02474	0.273632	3.74498	0.000180412	0.00417295
AT1G21730	270.802	1.14519	0.387361	2.95638	0.00311273	0.0351684
AT1G21830	202.395	1.47785	0.443593	3.33154	0.000863655	0.0135254
AT1G21890	16.5531	7.06795	2.15542	3.27916	0.00104116	0.0157131
AT1G22060	294.676	1.31163	0.385999	3.398	0.000678797	0.0113853
AT1G22065	377.542	1.54833	0.389734	3.97279	7.1e-05	0.00203288
AT1G22160	1501.91	1.02504	0.273576	3.74682	0.000179092	0.00415543
AT1G23080	186.568	4.92234	0.601751	8.18002	2.84e-16	4.07e-13
AT1G23340	63.0066	5.53501	1.07167	5.16485	2.41e-07	2.24e-05
AT1G23350	46.4844	3.45084	1.10671	3.1181	0.00182018	0.0238465
AT1G23480	26.0586	5.25545	1.42944	3.67657	0.000236391	0.00514188
AT1G24070	52.7573	2.77036	0.821768	3.37122	0.000748372	0.0122254
AT1G24120	312.098	1.25364	0.423592	2.95955	0.00308093	0.0349271
AT1G24520	218.351	2.77253	0.741415	3.73951	0.000184377	0.00424998
AT1G25220	165.417	1.25471	0.418518	2.99798	0.00271779	0.0319409
AT1G26460	419.109	1.09982	0.325878	3.37495	0.000738297	0.0121002
AT1G27045	268.048	2.59919	0.502538	5.17213	2.31e-07	2.17e-05
AT1G28110	472.939	1.07863	0.321428	3.35574	0.000791524	0.012703
AT1G28350	127.755	1.60664	0.523786	3.06736	0.00215959	0.0268638
AT1G29170	199.349	2.2054	0.451692	4.88253	1.05e-06	7.25e-05
AT1G29430	11.9533	6.59958	2.13241	3.09489	0.00196887	0.0251938
AT1G29460	35.9501	3.87418	0.965063	4.01444	5.96e-05	0.00179095
AT1G29470	1161.15	1.18004	0.276699	4.26469	2e-05	0.000791131
AT1G29670	2086.5	1.80155	0.423913	4.24981	2.14e-05	0.00082446
AT1G29720	49.1371	5.59326	1.10486	5.06241	4.14e-07	3.51e-05
AT1G29920	3205.7	1.32701	0.396493	3.34687	0.000817284	0.0129697
AT1G29950	733.58	1.72525	0.386099	4.46842	7.88e-06	0.00037137
AT1G29952	40.3089	8.35623	2.00112	4.17577	2.97e-05	0.0010516
AT1G30240	52.9464	2.15084	0.69365	3.10076	0.00193022	0.0247782
AT1G30690	596.285	1.20355	0.314308	3.8292	0.000128558	0.00324254
AT1G30820	936.354	1.41136	0.276373	5.10673	3.28e-07	2.89e-05
AT1G30860	9.36233	6.25046	2.21903	2.81675	0.0048512	0.0476505
AT1G30900	54.1379	2.89462	0.76172	3.80011	0.000144631	0.00352826
AT1G31250	41.0023	4.07279	1.13281	3.59529	0.000324031	0.00656465
AT1G31440	1018.44	1.31854	0.32318	4.07988	4.51e-05	0.0014521
AT1G31880	109.677	2.40596	0.579694	4.15041	3.32e-05	0.00115082
AT1G32060	906.624	1.22891	0.400343	3.06963	0.00214321	0.0267262
AT1G32860	102.765	1.60288	0.55911	2.86684	0.00414596	0.0430172
AT1G32900	223.889	1.65874	0.525221	3.15817	0.00158764	0.0215517
AT1G33170	32.7318	4.24367	1.22327	3.46913	0.000522149	0.00940197
AT1G33700	40.9849	5.33254	1.27647	4.17756	2.95e-05	0.00104704
AT1G35290	29.0712	4.39934	1.18337	3.71764	0.000201096	0.00452116
AT1G35720	1360.31	1.22389	0.295477	4.14207	3.44e-05	0.00118123
AT1G36280	157.495	1.57633	0.416333	3.78622	0.000152954	0.00368649
AT1G41830	693.087	2.7994	0.391341	7.15337	8.47e-13	4.72e-10
AT1G43650	244.175	2.64678	0.578632	4.5742	4.78e-06	0.000251573
AT1G43860	313.903	1.12178	0.353721	3.17136	0.00151727	0.0208075
AT1G44575	2402.75	1.2621	0.325037	3.88294	0.0001032	0.00273894
AT1G44900	74.5029	2.13487	0.733407	2.91089	0.00360397	0.0390275
AT1G45130	928.523	1.15138	0.40696	2.82922	0.00466611	0.0464593
AT1G45332	377.609	1.1298	0.35238	3.20619	0.00134504	0.0190843
AT1G47290	72.591	1.74622	0.605036	2.88615	0.00389988	0.0412253
AT1G47510	319.828	2.74953	0.499081	5.50919	3.6e-08	4.58e-06
AT1G47670	144.041	2.51881	0.826828	3.04635	0.00231635	0.0282535
AT1G47900	60.4603	2.42093	0.682358	3.54789	0.00038833	0.00752558
AT1G48600	964.332	2.28827	0.413804	5.52984	3.21e-08	4.15e-06
AT1G48760	405.567	1.22444	0.348192	3.51656	0.000437176	0.00819692
AT1G49010	49.5285	2.20573	0.769659	2.86586	0.00415884	0.0430927
AT1G49290	22.3474	7.5069	2.17625	3.44947	0.000561682	0.00993559
AT1G49490	165.101	2.86524	0.809979	3.53743	0.000404046	0.00774048
AT1G49560	103.718	1.95883	0.548966	3.56821	0.000359425	0.00709555
AT1G49750	619.112	3.2886	0.394514	8.33583	7.7e-17	1.29e-13
AT1G50700	181.545	1.37884	0.409701	3.36547	0.000764133	0.0123684
AT1G51110	76.0707	2.74248	0.894398	3.06629	0.00216735	0.0269103
AT1G51440	216.193	3.33779	0.444193	7.51428	5.72e-14	4.26e-11
AT1G51630	701.335	1.43185	0.270036	5.30244	1.14e-07	1.2e-05
AT1G51680	1071.56	2.12444	0.389548	5.45361	4.94e-08	5.9e-06
AT1G51700	1568.25	1.5883	0.255593	6.21416	5.16e-10	1.25e-07
AT1G52030	331.73	5.34304	1.23327	4.33242	1.47e-05	0.000618913
AT1G52040	81.7027	2.36464	0.840867	2.81215	0.00492122	0.0481962
AT1G52190	1470.67	2.87807	0.418223	6.88166	5.92e-12	2.58e-09
AT1G52200	458.995	1.52626	0.324489	4.70359	2.56e-06	0.000149626
AT1G52240	20.7111	7.39786	1.94298	3.80748	0.00014039	0.00344574
AT1G52380	350.864	1.21865	0.404476	3.0129	0.00258763	0.0306399
AT1G52400	675.052	2.99148	0.977474	3.06042	0.00221027	0.0273586
AT1G52410	346.026	1.8748	0.403471	4.64668	3.37e-06	0.000189704
AT1G52690	191.626	1.36056	0.425207	3.19977	0.00137539	0.0193539
AT1G52700	30.7057	4.14711	1.19628	3.46667	0.000526949	0.00946837
AT1G53163	41.1989	5.92741	1.29798	4.56664	4.96e-06	0.00025778
AT1G53340	45.1577	7.07082	1.63546	4.32344	1.54e-05	0.0006382
AT1G53840	452.451	1.0057	0.317171	3.17085	0.00151996	0.020816
AT1G54200	473.506	1.49534	0.478524	3.12489	0.0017787	0.023417
AT1G55020	13689.4	1.1362	0.230295	4.93367	8.07e-07	5.89e-05
AT1G55210	2267.31	1.07119	0.240752	4.44934	8.61e-06	0.000400305
AT1G55260	662.922	2.01872	0.39819	5.06973	3.98e-07	3.39e-05
AT1G55340	191.479	1.40506	0.496934	2.82747	0.00469181	0.0465403
AT1G56050	71.1757	2.30616	0.797906	2.89026	0.0038492	0.0409108
AT1G56210	161.677	3.36306	0.610831	5.50571	3.68e-08	4.61e-06
AT1G56720	131.081	2.65806	0.633318	4.19704	2.7e-05	0.000980056
AT1G58120	105.138	3.45452	1.01313	3.40973	0.000650271	0.01113
AT1G58122	107.223	3.2759	0.991426	3.30423	0.000952372	0.014567
AT1G58170	80.1155	9.34755	1.59296	5.86806	4.41e-09	7.57e-07
AT1G58270	134.161	2.10219	0.690593	3.04404	0.00233424	0.0284199
AT1G59730	139.57	3.36005	0.783099	4.29071	1.78e-05	0.000719462
AT1G59740	710.305	4.0961	1.00803	4.06347	4.83e-05	0.00153347
AT1G60060	210.538	1.94935	0.399174	4.88345	1.04e-06	7.24e-05
AT1G60070	767.607	1.00294	0.297146	3.37525	0.000737497	0.012097
AT1G60660	138.663	1.36346	0.470138	2.90013	0.00373006	0.0400902
AT1G60710	1119.13	1.18754	0.258842	4.58789	4.48e-06	0.000239085
AT1G60740	187.121	1.95638	0.677879	2.88603	0.00390139	0.0412253
AT1G60790	167.675	1.53069	0.47951	3.1922	0.00141195	0.0196859
AT1G60980	28.6566	6.41093	1.83597	3.49185	0.000479684	0.00876307
AT1G61290	16.643	5.61903	2.00535	2.80202	0.00507833	0.0493502
AT1G61450	17.1199	4.63234	1.63459	2.83395	0.00459766	0.046107
AT1G61563	170.529	2.16273	0.764871	2.82758	0.00469012	0.0465403
AT1G61600	113.755	2.52076	0.602253	4.18555	2.84e-05	0.0010199
AT1G62280	128.459	3.6477	0.718903	5.07397	3.9e-07	3.33e-05
AT1G62330	234.657	1.5656	0.495424	3.16011	0.00157709	0.021452
AT1G62390	670.06	1.04519	0.3136	3.33286	0.000859576	0.0134931
AT1G62480	600.327	3.83757	0.432683	8.86925	7.36e-19	1.48e-15
AT1G62740	758.747	1.00951	0.350216	2.88255	0.00394475	0.0415156
AT1G62870	100.572	3.03453	0.669477	4.53268	5.82e-06	0.000293056
AT1G62910	17.1589	4.64342	1.50929	3.07655	0.00209411	0.0263265
AT1G62981	72.6517	4.25731	0.850259	5.00707	5.53e-07	4.44e-05
AT1G63000	472.847	1.31798	0.327491	4.02449	5.71e-05	0.00173751
AT1G63240	106.159	2.35204	0.575242	4.08879	4.34e-05	0.0014042
AT1G63420	441.239	1.94586	0.44129	4.40948	1.04e-05	0.000461272
AT1G63430	549.988	1.12776	0.314504	3.58583	0.000336012	0.00673265
AT1G63520	9.4219	6.25858	2.16154	2.89543	0.00378637	0.0405002
AT1G63670	309.796	1.4359	0.445735	3.22142	0.00127556	0.0183581
AT1G63680	231.436	1.17836	0.356217	3.30798	0.000939712	0.014435
AT1G63980	627.917	1.18128	0.397315	2.97316	0.00294754	0.0336811
AT1G64170	322.297	1.85739	0.499809	3.71621	0.000202236	0.00453664
AT1G64330	344.074	1.30365	0.374646	3.47969	0.000502001	0.00907171
AT1G64390	487.49	1.83019	0.536426	3.41182	0.000645295	0.0110762
AT1G64405	21.771	7.46741	1.94996	3.82952	0.000128391	0.00324239
AT1G64450	42.1283	2.75758	0.904552	3.04855	0.00229945	0.0280647
AT1G64620	695.454	1.37733	0.290721	4.73762	2.16e-06	0.000131161
AT1G64625	94.5467	3.75441	0.757175	4.95844	7.11e-07	5.47e-05
AT1G64690	43.5512	5.41513	1.26241	4.28952	1.79e-05	0.000720449
AT1G64900	601.097	1.71603	0.368275	4.65964	3.17e-06	0.000180671
AT1G65032	24.346	3.80038	1.26842	2.99615	0.00273413	0.0320637
AT1G65180	31.0672	3.10803	0.981195	3.1676	0.00153702	0.0209923
AT1G65450	476.243	1.22711	0.323533	3.79285	0.000148928	0.00361552
AT1G65480	4543.95	2.3833	0.358469	6.64856	2.96e-11	1.01e-08
AT1G65800	232.607	1.56959	0.528457	2.97013	0.00297671	0.0339372
AT1G65900	54.0841	5.73161	1.07638	5.32487	1.01e-07	1.07e-05
AT1G65960	2043.24	1.55059	0.339072	4.57302	4.81e-06	0.000251573
AT1G65970	144.116	2.2637	0.801273	2.82514	0.00472605	0.0467874
AT1G66180	587.518	1.71989	0.2994	5.74444	9.22e-09	1.41e-06
AT1G66210	129.625	3.52014	0.876771	4.01489	5.95e-05	0.00179019
AT1G66230	68.9579	6.08694	1.11884	5.44038	5.32e-08	6.27e-06
AT1G66430	298.194	3.10581	0.470208	6.60519	3.97e-11	1.29e-08
AT1G66810	45.2138	7.07101	1.64115	4.30858	1.64e-05	0.000675978
AT1G66830	72.9273	1.75354	0.607005	2.88884	0.00386663	0.0409658
AT1G66940	17.9721	4.71428	1.5342	3.0728	0.00212059	0.0265734
AT1G66970	136.819	1.80709	0.486382	3.71537	0.000202907	0.00454155
AT1G67290	106.831	3.22221	1.05819	3.04504	0.00232653	0.0283604
AT1G67720	1003.4	1.21745	0.30179	4.03408	5.48e-05	0.00169027
AT1G67865	385.31	1.34638	0.312854	4.30352	1.68e-05	0.000688776
AT1G67900	458.174	1.96275	0.389282	5.04198	4.61e-07	3.85e-05
AT1G68060	417.991	2.39117	0.481264	4.96852	6.75e-07	5.27e-05
AT1G68110	65.3702	4.24274	0.930406	4.56009	5.11e-06	0.000263217
AT1G68130	274.518	2.99211	0.497845	6.01013	1.85e-09	3.45e-07
AT1G68170	255.656	3.42434	0.383792	8.92239	4.56e-19	1.02e-15
AT1G68700	158.653	1.47313	0.510289	2.88685	0.00389123	0.0411614
AT1G68740	280.704	2.55212	0.627917	4.06443	4.82e-05	0.00153205
AT1G68780	46.1128	5.08256	1.1511	4.4154	1.01e-05	0.000453187
AT1G68800	227.459	3.30995	0.695878	4.75652	1.97e-06	0.000122049
AT1G68810	431.853	4.51068	0.558486	8.07663	6.66e-16	8.35e-13
AT1G69200	39.8391	4.86919	1.32428	3.67685	0.000236128	0.00514188
AT1G69530	308.904	2.5172	0.560132	4.49393	6.99e-06	0.000339897
AT1G69580	31.3559	4.50383	1.18791	3.79139	0.000149809	0.00362812
AT1G69588	10.3753	6.39812	2.10911	3.03357	0.00241682	0.0291426
AT1G69760	375.988	2.34115	0.348536	6.71711	1.85e-11	6.53e-09
AT1G69970	29.5569	4.41718	1.23098	3.58834	0.000332787	0.00668805
AT1G70280	474.218	1.51989	0.467659	3.25	0.00115406	0.0170305
AT1G70470	30.5321	2.93494	1.03066	2.84764	0.00440443	0.0448647
AT1G70550	231.425	3.13768	0.411033	7.63365	2.28e-14	1.91e-11
AT1G70710	1817.4	1.45985	0.278447	5.24283	1.58e-07	1.57e-05
AT1G70800	21.0063	5.95906	1.90124	3.1343	0.00172265	0.022859
AT1G70830	1047.99	1.6765	0.304777	5.50074	3.78e-08	4.69e-06
AT1G70940	2379.61	1.98788	0.288007	6.9022	5.12e-12	2.28e-09
AT1G71050	142.046	2.17255	0.563066	3.85844	0.000114115	0.00295243
AT1G71060	27.7388	3.27322	1.07142	3.05502	0.00225044	0.0276875
AT1G71830	289.542	1.61326	0.377746	4.27075	1.95e-05	0.000774507
AT1G72110	30.3013	5.47681	1.39914	3.9144	9.06e-05	0.00246933
AT1G72180	4546.86	1.25306	0.21295	5.88431	4e-09	6.92e-07
AT1G72230	280.188	2.07823	0.466894	4.45117	8.54e-06	0.000397831
AT1G72410	192.759	2.00679	0.442997	4.53004	5.9e-06	0.000295253
AT1G72610	189.116	1.53	0.401391	3.81174	0.000137993	0.00340355
AT1G72970	418.41	2.20833	0.551957	4.00091	6.31e-05	0.00185481
AT1G73590	747.449	2.1391	0.297291	7.19533	6.23e-13	3.68e-10
AT1G73640	54.6901	4.99977	0.956387	5.22777	1.72e-07	1.67e-05
AT1G74055	96.8337	2.16758	0.649004	3.33985	0.000838229	0.0132304
AT1G74690	364.886	2.75491	0.489	5.63376	1.76e-08	2.49e-06
AT1G75280	1911.77	1.53303	0.301042	5.09243	3.54e-07	3.07e-05
AT1G75580	209.478	1.46851	0.436637	3.36323	0.000770369	0.012423
AT1G75680	611.581	1.76847	0.416589	4.24512	2.18e-05	0.000838685
AT1G75710	344.14	1.97201	0.400508	4.92376	8.49e-07	6.15e-05
AT1G75880	1656.29	2.00168	0.470608	4.25338	2.11e-05	0.000814553
AT1G75900	2888.68	2.40328	0.35707	6.73056	1.69e-11	6.28e-09
AT1G76100	520.045	1.10021	0.326488	3.36983	0.000752146	0.0122671
AT1G76270	164.231	1.63895	0.481856	3.40134	0.000670574	0.0113135
AT1G76500	49.0775	2.31778	0.794809	2.91615	0.00354386	0.0384803
AT1G76620	38.4743	3.60349	1.12848	3.19324	0.00140687	0.0196561
AT1G77490	118.492	1.7497	0.579892	3.01729	0.00255046	0.0302812
AT1G77590	331.273	1.38281	0.376141	3.6763	0.000236644	0.00514188
AT1G77670	846.815	1.08487	0.28091	3.86198	0.00011247	0.00291739
AT1G77690	28.631	6.40898	1.77273	3.61531	0.00029999	0.00618367
AT1G77720	171.608	1.29909	0.427151	3.04128	0.00235573	0.0285777
AT1G77760	655.683	1.69399	0.41173	4.11433	3.88e-05	0.00129935
AT1G78020	1444.38	1.09006	0.234431	4.64983	3.32e-06	0.000187826
AT1G78060	548.746	1.3903	0.354907	3.91737	8.95e-05	0.00244535
AT1G78090	175.53	2.19137	0.519916	4.21485	2.5e-05	0.000934489
AT1G78120	59.0741	4.84316	0.94118	5.14585	2.66e-07	2.44e-05
AT1G78370	733.841	2.72444	0.393099	6.93067	4.19e-12	1.91e-09
AT1G78450	99.6326	1.75086	0.625435	2.79943	0.00511924	0.0496277
AT1G78490	204.809	1.51133	0.433879	3.4833	0.000495277	0.00897443
AT1G78580	1467.81	1.49628	0.304022	4.92163	8.58e-07	6.2e-05
AT1G78770	79.2385	2.09442	0.624326	3.35468	0.00079456	0.0127273
AT1G78815	280.504	2.27688	0.382476	5.95301	2.63e-09	4.76e-07
AT1G78850	1916.97	1.07323	0.30066	3.56957	0.000357563	0.00707271
AT1G79110	328.539	2.39412	0.461136	5.1918	2.08e-07	1.98e-05
AT1G79620	434.973	2.68051	0.62039	4.32069	1.56e-05	0.000641242
AT1G79760	259.619	5.04402	0.629387	8.01418	1.11e-15	1.24e-12
AT1G79860	25.8357	4.65538	1.64732	2.82603	0.00471294	0.0467037
AT1G80270	183.268	1.58038	0.55453	2.84995	0.00437265	0.0446313
AT1G80280	130.092	1.67136	0.531596	3.14404	0.00166634	0.0222885
AT1G80520	46.9782	2.44395	0.763262	3.20198	0.00136487	0.0192513
AT1G80770	148.253	1.55129	0.482121	3.21763	0.00129257	0.0185099
AT1G80840	360.811	1.74817	0.462212	3.78218	0.00015546	0.00371568
AT2G01210	42.3464	4.62858	1.10353	4.19434	2.74e-05	0.000987575
AT2G01430	277.497	2.74979	0.441992	6.22136	4.93e-10	1.21e-07
AT2G01760	41.6348	2.55191	0.909893	2.80462	0.0050376	0.049097
AT2G01910	1015.7	1.68419	0.379644	4.43623	9.15e-06	0.000421565
AT2G01950	91.3406	3.48682	0.645416	5.40244	6.57e-08	7.46e-06
AT2G01990	89.9922	6.47702	1.00874	6.42092	1.35e-10	4e-08
AT2G02580	242.672	1.38576	0.402865	3.43976	0.000582238	0.0101915
AT2G03090	76.8094	2.96939	0.643786	4.61238	3.98e-06	0.000217178
AT2G03340	235.549	1.22702	0.365947	3.353	0.000799412	0.0127582
AT2G03500	52.6447	2.56074	0.743765	3.44295	0.000575406	0.0100895
AT2G04025	150.392	1.68104	0.5177	3.24713	0.00116576	0.017159
AT2G04660	113.803	2.16831	0.597117	3.63129	0.000282003	0.00590384
AT2G04865	537.898	1.04255	0.315898	3.30027	0.000965931	0.0147475
AT2G05790	1429.8	1.28304	0.32522	3.94515	7.97e-05	0.00222306
AT2G05920	5311.72	1.2512	0.237888	5.25964	1.44e-07	1.47e-05
AT2G05940	278.08	1.39557	0.412164	3.38595	0.000709316	0.0117306
AT2G07040	70.2867	4.34195	1.19779	3.62499	0.000288978	0.00601223
AT2G07170	14.5705	6.88624	1.96805	3.49902	0.000466966	0.00859329
AT2G07680	132.693	2.14412	0.505793	4.23912	2.24e-05	0.000858124
AT2G07690	166.942	1.86049	0.493547	3.76962	0.000163493	0.00385717
AT2G10940	327.679	2.08494	0.552935	3.77068	0.000162801	0.00384537
AT2G12480	1199.09	1.29314	0.312325	4.14036	3.47e-05	0.00118804
AT2G13350	50.6879	8.68727	1.70323	5.10045	3.39e-07	2.96e-05
AT2G13690	147.618	1.5012	0.523522	2.8675	0.00413731	0.0429497
AT2G14890	4589.96	1.66279	0.379645	4.37984	1.19e-05	0.000517234
AT2G16430	936.593	2.30699	0.328021	7.03308	2.02e-12	1.01e-09
AT2G16440	188.636	1.69241	0.574717	2.94478	0.00323188	0.0361283
AT2G16730	91.8414	2.98764	0.866871	3.44647	0.000567961	0.010029
AT2G16880	305.233	1.21094	0.353945	3.42128	0.000623273	0.0107504
AT2G16890	679.266	1.58364	0.423456	3.73981	0.000184159	0.00424985
AT2G17210	10.7794	6.45208	2.14456	3.00858	0.00262475	0.0310166
AT2G17525	25.4749	7.69544	1.86214	4.13258	3.59e-05	0.00121771
AT2G17690	126.917	1.49099	0.496605	3.00236	0.00267893	0.0315824
AT2G17740	30.9463	7.97668	1.83552	4.34573	1.39e-05	0.000590444
AT2G17970	78.9188	2.16058	0.634868	3.4032	0.000666021	0.0112746
AT2G18560	105.923	2.25919	0.545005	4.14527	3.39e-05	0.00116888
AT2G18570	158.796	1.34326	0.443072	3.03171	0.00243175	0.02927
AT2G19000	18.2255	7.21387	2.157	3.3444	0.000824597	0.0130461
AT2G19050	10.3006	6.3881	2.11382	3.02206	0.0025106	0.0300032
AT2G19460	23.3194	4.07239	1.36747	2.97805	0.00290086	0.0333869
AT2G20060	211.78	1.27396	0.430129	2.9618	0.0030585	0.0347316
AT2G20610	843.148	1.10264	0.314641	3.50445	0.000457551	0.00845879
AT2G20635	48.5718	3.51857	0.888504	3.9601	7.49e-05	0.00210956
AT2G21140	4596.35	1.54924	0.314925	4.9194	8.68e-07	6.21e-05
AT2G21790	179.663	1.51892	0.498111	3.04936	0.00229329	0.0280233
AT2G22080	1021.53	1.68178	0.417501	4.02821	5.62e-05	0.00172011
AT2G22140	9.98142	6.33822	2.19338	2.88971	0.00385597	0.0409394
AT2G22190	40.7709	3.53375	1.24933	2.82851	0.0046765	0.0464803
AT2G22240	4087.01	3.12583	0.449843	6.94871	3.69e-12	1.72e-09
AT2G22460	601.884	2.70163	0.952791	2.8355	0.00457546	0.0459768
AT2G22990	5709.93	1.23006	0.232982	5.27964	1.29e-07	1.34e-05
AT2G23170	45174.8	3.8531	0.698287	5.51794	3.43e-08	4.39e-06
AT2G23180	323.011	1.99419	0.4923	4.05075	5.11e-05	0.0016066
AT2G23410	46.7986	2.65775	0.801955	3.31409	0.000919404	0.0141773
AT2G23600	194.749	2.13602	0.39188	5.45069	5.02e-08	5.96e-06
AT2G23950	445.108	1.37463	0.307342	4.47263	7.73e-06	0.000368381
AT2G24030	21.3612	5.9823	1.79656	3.32987	0.000868865	0.0135964
AT2G24230	501.894	1.87158	0.43739	4.27897	1.88e-05	0.00075392
AT2G24350	21.787	4.40233	1.50372	2.92763	0.00341552	0.0374923
AT2G24450	184.99	2.51072	0.74001	3.39282	0.000691762	0.0115244
AT2G24570	253.163	2.0592	0.578529	3.55937	0.000371749	0.00726032
AT2G24645	22.9718	4.47092	1.43563	3.11426	0.00184407	0.0240546
AT2G25420	151.782	1.538	0.518664	2.96532	0.00302368	0.0343946
AT2G25480	61.4518	2.10181	0.690402	3.04432	0.00233205	0.0284105
AT2G25790	719.098	1.17997	0.30332	3.8902	0.000100163	0.00267061
AT2G26440	1643.34	2.40994	0.400846	6.01213	1.83e-09	3.44e-07
AT2G26450	218.422	2.86477	0.747259	3.8337	0.000126231	0.00319992
AT2G26730	607.001	2.40312	0.447956	5.36464	8.11e-08	8.92e-06
AT2G27050	358.794	1.61866	0.402799	4.01852	5.86e-05	0.00176641
AT2G27740	60.8762	5.48696	0.975899	5.62247	1.88e-08	2.62e-06
AT2G27770	61.6662	2.94934	0.713611	4.13298	3.58e-05	0.00121771
AT2G28180	29.7391	7.91739	1.90169	4.16335	3.14e-05	0.00110268
AT2G28310	363.16	1.69592	0.346037	4.90097	9.54e-07	6.72e-05
AT2G28410	179.833	2.90304	0.540628	5.36975	7.88e-08	8.78e-06
AT2G28460	40.4907	4.05964	1.05497	3.84812	0.000119028	0.00304475
AT2G28470	594.118	1.91262	0.416172	4.59575	4.31e-06	0.000232714
AT2G28630	354.627	2.14799	0.474784	4.52413	6.06e-06	0.000301371
AT2G28671	28.6981	7.86819	1.9069	4.12618	3.69e-05	0.00124459
AT2G28790	356.579	2.96867	0.661086	4.49059	7.1e-06	0.000343606
AT2G28870	66.0089	2.21769	0.737934	3.00526	0.00265351	0.0313196
AT2G29510	322.585	1.07071	0.344601	3.1071	0.00188931	0.0244405
AT2G30280	191.103	1.41025	0.422411	3.33858	0.000842078	0.0132808
AT2G30480	49.9809	3.12154	1.06792	2.92301	0.00346669	0.0378882
AT2G30780	140.206	1.81786	0.535978	3.39167	0.000694681	0.0115456
AT2G30890	33.6672	4.28544	1.16286	3.68526	0.000228469	0.00502958
AT2G30960	185.972	2.06043	0.61535	3.34839	0.000812821	0.0129208
AT2G31083	95.4142	5.81471	0.945162	6.15208	7.65e-10	1.73e-07
AT2G31110	1198.95	1.16734	0.254248	4.59136	4.4e-06	0.000235771
AT2G31500	114.172	4.1945	0.980659	4.27722	1.89e-05	0.00075836
AT2G31790	170.321	1.72864	0.448385	3.85526	0.000115607	0.00298335
AT2G32487	93.5334	3.39365	0.641665	5.28882	1.23e-07	1.29e-05
AT2G32560	770.832	1.31435	0.410969	3.19819	0.00138294	0.0194299
AT2G32690	3390.33	1.18662	0.325059	3.65048	0.000261749	0.00557279
AT2G33060	1848.2	1.81671	0.38547	4.71296	2.44e-06	0.000144167
AT2G33270	41.1076	5.92445	1.58678	3.73364	0.000188735	0.00431084
AT2G33310	1623.58	1.61495	0.280913	5.74892	8.98e-09	1.39e-06
AT2G33330	62.432	2.47337	0.679555	3.63968	0.000272972	0.00575205
AT2G33810	661.533	2.15233	0.412259	5.22083	1.78e-07	1.72e-05
AT2G34150	48.6061	3.27868	0.790674	4.14669	3.37e-05	0.00116364
AT2G34170	38.772	5.84038	1.33304	4.38123	1.18e-05	0.000516158
AT2G34357	372.69	1.04176	0.350133	2.97532	0.00292687	0.0335788
AT2G34710	498.146	1.43098	0.408123	3.50626	0.000454455	0.00841547
AT2G34970	463.71	1.23971	0.345812	3.58492	0.000337186	0.00673601
AT2G35350	567.838	1.50673	0.464693	3.24243	0.00118514	0.0173467
AT2G35860	917.352	1.55468	0.421769	3.68608	0.000227731	0.00501883
AT2G35960	413.92	2.03464	0.41527	4.89957	9.6e-07	6.74e-05
AT2G36020	193.32	2.97295	0.876151	3.39319	0.00069083	0.0115198
AT2G36200	54.9557	3.00011	0.891474	3.36533	0.000764518	0.0123684
AT2G36340	205.269	1.4957	0.422766	3.53789	0.000403331	0.00773418
AT2G36380	1967.89	1.49234	0.332785	4.4844	7.31e-06	0.000351194
AT2G36570	218.281	1.35674	0.413895	3.27797	0.00104558	0.015748
AT2G36910	1554.85	1.02497	0.330816	3.09831	0.00194625	0.024936
AT2G37040	774.455	1.31646	0.318138	4.13802	3.5e-05	0.00119411
AT2G37080	269.36	1.77175	0.482501	3.67201	0.000240653	0.00521769
AT2G37090	43.4254	2.99583	0.819838	3.65417	0.000258015	0.00549912
AT2G37230	233.566	1.76266	0.399419	4.41306	1.02e-05	0.000455733
AT2G37420	57.4656	4.37989	0.967946	4.52493	6.04e-06	0.000300986
AT2G38090	357.175	2.41172	0.426111	5.65985	1.52e-08	2.2e-06
AT2G38320	51.9252	3.07596	0.908879	3.38435	0.000713481	0.0117704
AT2G38500	35.8172	3.18665	1.12819	2.82457	0.00473435	0.0468234
AT2G38640	206.275	1.95251	0.431905	4.52068	6.16e-06	0.000304066
AT2G39660	400.928	1.19626	0.387869	3.08418	0.00204115	0.0258877
AT2G39690	23.5255	5.10931	1.44814	3.52819	0.000418408	0.00794738
AT2G39700	248.635	1.61071	0.555487	2.89964	0.00373594	0.0401104
AT2G39930	468.706	1.63858	0.348177	4.70616	2.52e-06	0.000148187
AT2G40116	21.7705	7.46854	1.86208	4.01087	6.05e-05	0.00181282
AT2G40320	213.057	1.89267	0.557399	3.39553	0.00068496	0.0114504
AT2G40480	61.1204	2.0976	0.721071	2.90901	0.00362581	0.0391583
AT2G40750	38.4736	8.2862	1.70354	4.86409	1.15e-06	7.85e-05
AT2G40890	1528.46	1.26207	0.282416	4.46885	7.86e-06	0.00037137
AT2G41260	15212.2	1.44663	0.240951	6.00381	1.93e-09	3.52e-07
AT2G41310	51.6453	2.90505	1.00538	2.88951	0.00385849	0.0409444
AT2G41510	55.797	7.37443	1.63314	4.51548	6.32e-06	0.000309645
AT2G41550	185.9	1.40036	0.407328	3.43793	0.000586178	0.0102337
AT2G41820	175.291	1.72387	0.447356	3.85347	0.000116455	0.00299368
AT2G42190	305.109	1.37087	0.353208	3.88119	0.000103946	0.00275321
AT2G42200	66.881	2.28488	0.742628	3.07676	0.00209267	0.0263249
AT2G42220	254.871	2.44116	0.496254	4.91918	8.69e-07	6.21e-05
AT2G42380	21.4622	5.98893	1.94323	3.08195	0.00205652	0.0260332
AT2G42690	766.601	1.52032	0.379893	4.00198	6.28e-05	0.00185402
AT2G43570	51.5799	2.59315	0.719374	3.60473	0.000312482	0.00639521
AT2G43840	36.2059	3.06765	1.01872	3.01129	0.00260143	0.0307772
AT2G44160	1485.37	1.33707	0.291628	4.58487	4.54e-06	0.00024128
AT2G44190	15.0427	6.93575	1.98903	3.487	0.000488467	0.00888312
AT2G44230	96.1796	3.32243	0.714607	4.64931	3.33e-06	0.000187826
AT2G44640	67.6029	2.54982	0.63355	4.02465	5.71e-05	0.00173751
AT2G44760	230.882	1.58539	0.420638	3.76901	0.000163897	0.00386216
AT2G44830	339.474	1.05419	0.344741	3.05792	0.00222879	0.0275023
AT2G44940	86.7825	4.3929	0.83176	5.28145	1.28e-07	1.33e-05
AT2G45180	96.6002	1.47043	0.52086	2.82307	0.00475655	0.0469854
AT2G45470	1031.41	3.25234	0.319766	10.171	2.67e-24	8.94e-21
AT2G45590	202.472	1.61811	0.391004	4.13834	3.5e-05	0.00119411
AT2G45680	327.126	1.67608	0.383471	4.37081	1.24e-05	0.000532187
AT2G46590	585.909	2.32324	0.364417	6.37522	1.83e-10	5e-08
AT2G46630	451.918	2.74783	0.437053	6.28717	3.23e-10	8.32e-08
AT2G46650	94.7378	1.75342	0.551651	3.1785	0.00148041	0.0203936
AT2G46660	429.48	1.75906	0.530205	3.31769	0.000907641	0.0140499
AT2G46690	192.619	1.82484	0.508619	3.58784	0.000333435	0.00668962
AT2G46960	1541.87	1.10532	0.266079	4.1541	3.27e-05	0.00113692
AT2G46990	56.339	5.79206	1.05637	5.48298	4.18e-08	5.15e-06
AT2G47160	1805.01	1.18031	0.343318	3.43794	0.000586158	0.0102337
AT2G47500	118.979	1.67631	0.519212	3.22857	0.00124409	0.0180494
AT2G47750	2366.13	4.01424	0.45363	8.84914	8.82e-19	1.61e-15
AT2G47810	118.985	1.89328	0.599441	3.15841	0.0015863	0.0215481
AT2G47860	236.021	1.40139	0.450444	3.11113	0.00186374	0.0242189
AT2G47920	14.0268	6.83137	1.96045	3.4846	0.000492882	0.00894718
AT2G48140	74.0563	2.08895	0.665722	3.13787	0.00170179	0.022655
AT3G01080	17.2733	4.65724	1.56715	2.97179	0.00296065	0.0337733
AT3G01420	3325.42	2.04004	0.286819	7.11263	1.14e-12	6.18e-10
AT3G01690	2217.95	1.04314	0.35059	2.97539	0.0029262	0.0335788
AT3G01840	27.9443	6.37211	1.71547	3.71451	0.000203599	0.00455195
AT3G01860	165.421	2.77073	0.429376	6.45293	1.1e-10	3.34e-08
AT3G02490	141.014	1.49644	0.521207	2.87111	0.00409027	0.0425848
AT3G02950	340.557	1.1217	0.374805	2.99275	0.00276473	0.0322343
AT3G02970	68.4661	3.18746	1.07035	2.97795	0.00290184	0.0333869
AT3G03450	1248.22	1.39312	0.360702	3.86223	0.000112356	0.00291739
AT3G03630	39.6546	3.33715	0.884723	3.77197	0.000161965	0.00383013
AT3G03770	334.941	1.49293	0.455597	3.27688	0.00104962	0.0157971
AT3G03780	1293.13	1.98143	0.308395	6.42496	1.32e-10	3.95e-08
AT3G03800	19.739	7.32801	1.89599	3.86501	0.000111086	0.00289645
AT3G04280	441.295	4.5709	0.447927	10.2046	1.89e-24	7.6e-21
AT3G04290	183.938	3.0595	0.481974	6.34785	2.18e-10	5.77e-08
AT3G04360	80.6845	2.92983	1.01334	2.89125	0.0038371	0.040847
AT3G04700	49.3113	8.64742	1.96214	4.40713	1.05e-05	0.000465275
AT3G04760	459.002	1.1977	0.394667	3.03472	0.0024076	0.0290489
AT3G05190	45.676	3.55654	0.98728	3.60236	0.000315345	0.00644068
AT3G05470	15.615	5.52798	1.94947	2.83563	0.00457352	0.0459768
AT3G05900	248.434	1.25865	0.428318	2.93858	0.00329719	0.0366868
AT3G05980	35.9515	6.73812	1.6544	4.07285	4.64e-05	0.00148709
AT3G06020	69.8406	7.70206	1.6171	4.76287	1.91e-06	0.000118999
AT3G06035	347.135	2.95732	0.330138	8.95785	3.31e-19	8.31e-16
AT3G06130	1656.99	1.17698	0.301066	3.90938	9.25e-05	0.00250718
AT3G06145	65.6513	2.84658	0.851101	3.34459	0.000824047	0.0130461
AT3G06260	45.9183	3.19478	1.04016	3.07144	0.0021303	0.026648
AT3G06430	222.884	1.61104	0.47301	3.40593	0.000659382	0.0112095
AT3G06750	371.197	1.86138	0.309248	6.01904	1.75e-09	3.41e-07
AT3G07130	22.4581	5.0336	1.5349	3.27943	0.00104017	0.0157131
AT3G07320	310.676	3.20285	0.384951	8.32015	8.79e-17	1.36e-13
AT3G08500	14.9163	6.92344	1.9848	3.48822	0.000486245	0.00885072
AT3G08680	1167.63	1.01942	0.266378	3.82698	0.000129726	0.00326617
AT3G09035	292.114	1.61627	0.337823	4.78438	1.72e-06	0.000107948
AT3G09070	168.063	1.76958	0.590317	2.99767	0.00272048	0.0319409
AT3G09190	604.143	2.2604	0.352689	6.40903	1.46e-10	4.2e-08
AT3G09260	89.1964	3.9034	0.80991	4.81955	1.44e-06	9.35e-05
AT3G10200	113.418	1.92299	0.508929	3.77851	0.00015777	0.00375747
AT3G10560	543.573	1.17438	0.340994	3.444	0.000573181	0.0100832
AT3G10570	493.533	2.65478	0.601421	4.41418	1.01e-05	0.000454385
AT3G10940	241.823	1.11661	0.373863	2.98669	0.00282019	0.0326918
AT3G11680	87.6552	9.47709	1.59388	5.94591	2.75e-09	4.93e-07
AT3G11690	369.842	1.29028	0.40078	3.21942	0.00128451	0.0184402
AT3G11720	79.4609	3.91952	0.708607	5.53131	3.18e-08	4.14e-06
AT3G12145	1107.23	2.54669	0.338921	7.51411	5.73e-14	4.26e-11
AT3G12170	12.3307	6.64364	2.06199	3.22195	0.00127321	0.0183374
AT3G12710	86.6468	5.67539	0.943071	6.01799	1.77e-09	3.41e-07
AT3G12890	55.8641	3.99912	0.97228	4.11314	3.9e-05	0.00129957
AT3G12920	406.271	1.619	0.364065	4.44701	8.71e-06	0.000403741
AT3G13175	67.9792	2.01945	0.699233	2.88809	0.00387592	0.0410427
AT3G13560	127.045	1.84765	0.48303	3.82512	0.000130709	0.00327622
AT3G13730	354.345	2.21851	0.392353	5.65437	1.56e-08	2.26e-06
AT3G13790	75.5477	2.89296	0.966198	2.99417	0.0027519	0.0321594
AT3G14310	479.423	1.54157	0.477345	3.22946	0.00124026	0.018044
AT3G14330	54.6148	2.98996	0.891821	3.35265	0.000800428	0.0127643
AT3G14520	608.837	1.82571	0.376604	4.84783	1.25e-06	8.44e-05
AT3G14540	21.5708	6.00006	1.87352	3.20256	0.00136212	0.0192486
AT3G14550	167.701	4.53399	0.627151	7.22951	4.85e-13	3.04e-10
AT3G14560	1764.46	1.57084	0.272877	5.75658	8.58e-09	1.34e-06
AT3G14570	266.925	1.3947	0.379279	3.67724	0.000235772	0.00514188
AT3G14890	57.5582	2.57469	0.829694	3.10319	0.0019145	0.0246552
AT3G14950	10.8504	6.46054	2.18998	2.95005	0.00317722	0.0356762
AT3G15095	701.937	1.14384	0.358952	3.18662	0.00143948	0.0200142
AT3G15300	252.747	1.91847	0.438133	4.37874	1.19e-05	0.000518742
AT3G15550	20.2178	4.28606	1.41569	3.02755	0.00246547	0.029598
AT3G15590	297.316	1.31394	0.407598	3.22361	0.00126584	0.0182649
AT3G15650	368.779	2.94943	0.536215	5.50047	3.79e-08	4.69e-06
AT3G15790	618.158	1.72856	0.362915	4.76298	1.91e-06	0.000118999
AT3G15970	658.468	1.06311	0.345992	3.07265	0.00212169	0.0265734
AT3G16170	630.973	1.0173	0.320249	3.17658	0.0014902	0.0205064
AT3G16290	328.958	1.01567	0.361206	2.81188	0.00492535	0.0481962
AT3G16500	356.319	1.23957	0.354469	3.49697	0.000470577	0.00864389
AT3G16610	16.7597	7.09256	1.98905	3.5658	0.000362754	0.00713396
AT3G16950	326.158	1.27596	0.403249	3.1642	0.00155511	0.0212106
AT3G17010	11.4797	6.54567	2.14425	3.05266	0.00226821	0.0277845
AT3G17060	150.975	2.62782	0.754176	3.48435	0.00049333	0.00894724
AT3G17280	9.35674	6.24889	2.15954	2.89363	0.00380823	0.0406474
AT3G17600	272.093	4.05051	0.698341	5.8002	6.62e-09	1.07e-06
AT3G17830	30.7539	3.63479	1.21249	2.99778	0.00271957	0.0319409
AT3G17840	153.366	2.51117	0.511827	4.90629	9.28e-07	6.58e-05
AT3G18050	115.95	5.24264	0.713582	7.34693	2.03e-13	1.31e-10
AT3G18240	114.531	1.94264	0.62435	3.11145	0.00186168	0.0242079
AT3G18550	44.8137	3.82725	1.06044	3.60913	0.000307228	0.00630697
AT3G18660	75.6609	2.20001	0.718431	3.06225	0.00219683	0.0272258
AT3G18710	61.4089	3.75306	0.801317	4.68361	2.82e-06	0.000162933
AT3G18850	357.778	3.10671	0.419857	7.39945	1.37e-13	9.15e-11
AT3G18960	28.0731	4.00923	1.0893	3.68054	0.000232738	0.00510119
AT3G19200	12.3829	6.65651	2.19062	3.03864	0.00237649	0.0287599
AT3G19370	220.274	2.34246	0.558185	4.19657	2.71e-05	0.000980313
AT3G19390	264.816	1.45615	0.346843	4.19829	2.69e-05	0.000980056
AT3G19450	270.138	1.32663	0.4238	3.13032	0.00174615	0.0230853
AT3G19540	579.942	1.55134	0.314022	4.94023	7.8e-07	5.75e-05
AT3G19550	2609.02	2.53706	0.407148	6.2313	4.63e-10	1.15e-07
AT3G19620	73.7054	1.80096	0.640623	2.81127	0.00493468	0.0482344
AT3G19820	2327.02	1.6051	0.277897	5.77586	7.66e-09	1.23e-06
AT3G20190	67.8205	9.10736	1.81565	5.01605	5.27e-07	4.3e-05
AT3G20210	871.063	1.86165	0.514548	3.61804	0.000296844	0.00614447
AT3G20300	79.7744	2.81649	0.783326	3.59556	0.000323699	0.00656454
AT3G20530	85.9995	3.9501	1.08838	3.62934	0.000284143	0.00594245
AT3G20860	96.3466	2.10276	0.619033	3.39685	0.000681664	0.0114143
AT3G20960	318.867	1.24512	0.411407	3.02649	0.00247414	0.0296557
AT3G21190	473.357	1.05899	0.303739	3.4865	0.000489382	0.0088917
AT3G21240	639.306	1.20325	0.343876	3.49907	0.000466884	0.00859329
AT3G21270	435.746	2.67508	0.598161	4.47217	7.74e-06	0.000368381
AT3G21400	97.6489	1.98848	0.533112	3.72996	0.000191511	0.0043495
AT3G21500	177.038	2.7831	0.647312	4.29948	1.71e-05	0.000698607
AT3G21570	28.9461	7.87992	1.77877	4.42999	9.42e-06	0.000431958
AT3G21700	112.445	2.3359	0.796137	2.93404	0.00334581	0.0369966
AT3G22420	348.491	1.22595	0.4319	2.8385	0.00453268	0.0457759
AT3G22640	40.2432	5.89352	1.31566	4.47952	7.48e-06	0.000358461
AT3G22840	284.497	2.7351	0.547109	4.99918	5.76e-07	4.57e-05
AT3G23030	2932.85	1.65941	0.334108	4.96668	6.81e-07	5.28e-05
AT3G23050	1162.52	1.75597	0.464498	3.78036	0.000156602	0.00373408
AT3G23410	314.261	1.49914	0.384992	3.89395	9.86e-05	0.00263657
AT3G23780	960.334	1.07866	0.291502	3.70036	0.000215297	0.00479167
AT3G23810	1791.11	2.11797	0.436813	4.84869	1.24e-06	8.43e-05
AT3G23820	2716.15	1.49028	0.35446	4.20437	2.62e-05	0.000962718
AT3G24535	20.2929	3.86199	1.35902	2.84175	0.00448667	0.0454255
AT3G24660	226.464	2.4283	0.525531	4.62066	3.83e-06	0.000210407
AT3G25130	165.615	5.76184	0.770509	7.47797	7.55e-14	5.41e-11
AT3G25500	264.06	1.97	0.379094	5.1966	2.03e-07	1.94e-05
AT3G25560	133.083	1.60656	0.489441	3.28245	0.00102911	0.0155818
AT3G25570	15.1978	6.94918	2.40203	2.89304	0.00381529	0.0407011
AT3G25590	169.732	4.18082	0.682556	6.12524	9.05e-10	2e-07
AT3G25620	350.047	1.8513	0.36901	5.01695	5.25e-07	4.3e-05
AT3G25710	363.294	2.05222	0.492759	4.16475	3.12e-05	0.00109785
AT3G25717	148.792	3.16404	0.774088	4.08745	4.36e-05	0.00140779
AT3G25730	104.23	1.73139	0.614987	2.81533	0.00487277	0.0478155
AT3G25920	505.024	1.18819	0.381944	3.11089	0.00186522	0.0242225
AT3G26060	464.715	1.37179	0.376533	3.64322	0.000269247	0.00570821
AT3G26110	129.573	3.29699	0.854831	3.8569	0.000114835	0.00296724
AT3G26210	346.193	1.30685	0.444443	2.94042	0.00327768	0.0365183
AT3G26220	827.609	1.58064	0.348868	4.53077	5.88e-06	0.000294981
AT3G26700	63.559	1.98786	0.639063	3.11059	0.00186717	0.0242322
AT3G27025	123.074	2.08079	0.621786	3.34647	0.000818477	0.0129697
AT3G27500	10.9696	6.47396	2.20795	2.93212	0.0033666	0.0371442
AT3G28790	120.506	5.88762	1.76711	3.33178	0.000862911	0.0135243
AT3G28980	103.789	4.78395	1.14064	4.19408	2.74e-05	0.000987575
AT3G29320	619.429	1.70894	0.504948	3.38439	0.000713377	0.0117704
AT3G29370	24.2672	6.16833	1.81291	3.40245	0.000667843	0.011277
AT3G30180	647.008	2.58686	0.473405	5.46437	4.65e-08	5.65e-06
AT3G30300	346.505	1.22834	0.306724	4.00471	6.21e-05	0.00183601
AT3G42670	27.3352	5.32719	1.43026	3.72463	0.000195604	0.00441252
AT3G43190	1232.31	2.66764	0.477866	5.58241	2.37e-08	3.2e-06
AT3G43270	1320.38	2.05972	0.349227	5.89795	3.68e-09	6.43e-07
AT3G43430	23.9539	4.10863	1.27746	3.21624	0.00129884	0.0185599
AT3G43800	414.717	1.20715	0.383607	3.14684	0.00165045	0.0221085
AT3G44220	113.847	1.55988	0.496999	3.1386	0.00169759	0.0226461
AT3G44450	187.52	1.47368	0.458989	3.21072	0.00132405	0.0188531
AT3G45140	611.137	1.12881	0.352619	3.20121	0.00136851	0.0192811
AT3G45420	19.9976	4.27188	1.38694	3.08006	0.00206956	0.0261087
AT3G45850	104.81	2.36185	0.541752	4.35966	1.3e-05	0.000556464
AT3G46510	611.085	1.03152	0.36374	2.83586	0.00457025	0.0459704
AT3G46550	209.281	1.6007	0.405934	3.94325	8.04e-05	0.00223527
AT3G47400	93.9077	2.82849	0.789487	3.58269	0.000340074	0.0067802
AT3G47620	106.609	2.38793	0.581995	4.103	4.08e-05	0.0013489
AT3G47690	78.3584	2.4144	0.601536	4.01372	5.98e-05	0.00179374
AT3G48230	1199.37	3.92507	1.31398	2.98717	0.00281574	0.0326918
AT3G48240	133.385	2.50376	0.596555	4.19703	2.7e-05	0.000980056
AT3G48290	97.9732	5.59118	0.841632	6.64326	3.07e-11	1.03e-08
AT3G48610	544.03	1.26621	0.337171	3.7554	0.000173067	0.004045
AT3G48770	157.886	2.27546	0.761843	2.98678	0.00281933	0.0326918
AT3G48830	18.4782	5.76965	1.82911	3.15435	0.00160859	0.0217625
AT3G49220	1535.39	1.50137	0.286414	5.24195	1.59e-07	1.57e-05
AT3G49725	63.7801	3.07437	0.709571	4.33271	1.47e-05	0.000618913
AT3G49810	252.62	1.62705	0.402149	4.04589	5.21e-05	0.00162756
AT3G50010	23.421	7.57352	1.95468	3.87455	0.00010682	0.00281079
AT3G50310	23.3181	7.56903	2.02281	3.74183	0.000182682	0.00422061
AT3G50340	278.11	1.323	0.388815	3.40264	0.000667382	0.011277
AT3G51150	61.9322	2.88641	0.835993	3.45267	0.000555058	0.00984444
AT3G51220	63.4619	3.39066	0.716297	4.7336	2.21e-06	0.000133131
AT3G51280	89.4297	2.2613	0.568455	3.97797	6.95e-05	0.00199926
AT3G51670	1409.76	1.06906	0.260667	4.10123	4.11e-05	0.0013526
AT3G51800	1189.16	1.01657	0.332778	3.05481	0.00225202	0.0276875
AT3G51950	875.875	1.84531	0.351287	5.25298	1.5e-07	1.5e-05
AT3G52010	71.7933	2.5459	0.89501	2.84456	0.00444735	0.0451413
AT3G52080	10.4982	6.41199	2.13845	2.99842	0.0027138	0.0319185
AT3G52180	375.043	1.27282	0.378024	3.36703	0.000759815	0.0123321
AT3G52380	318.569	1.17514	0.405996	2.89447	0.00379796	0.040581
AT3G52500	1638.99	2.2015	0.395597	5.56501	2.62e-08	3.49e-06
AT3G53040	55.9258	2.79381	0.795162	3.51351	0.000442222	0.00826675
AT3G53190	144.195	1.85989	0.625484	2.97353	0.002944	0.0336811
AT3G53260	675.05	1.22664	0.324987	3.77442	0.000160381	0.00380395
AT3G53380	160.509	1.86774	0.599019	3.118	0.00182083	0.0238465
AT3G54160	10.3507	6.39315	2.11306	3.02554	0.0024819	0.0297132
AT3G54240	12.0233	6.61312	2.09457	3.15727	0.00159253	0.021589
AT3G54600	679.344	1.25201	0.36769	3.40507	0.000661475	0.0112261
AT3G54750	88.9816	2.32289	0.623349	3.72646	0.000194188	0.00439538
AT3G55060	383.951	1.16292	0.376916	3.08537	0.00203301	0.0258067
AT3G55420	47.9547	3.49959	0.898393	3.89539	9.8e-05	0.00263011
AT3G55630	119.545	1.82349	0.527731	3.45534	0.000549606	0.00976641
AT3G55710	31.9216	4.53174	1.48393	3.05388	0.00225901	0.0277093
AT3G55800	620.953	1.61515	0.438361	3.68452	0.000229138	0.00503326
AT3G55990	183.542	1.97738	0.498678	3.96525	7.33e-05	0.00207799
AT3G56060	456.486	2.35254	0.407958	5.76662	8.09e-09	1.28e-06
AT3G56370	294.168	1.47294	0.443774	3.31912	0.000903027	0.0140014
AT3G56810	126.568	2.19727	0.525799	4.17892	2.93e-05	0.00104264
AT3G57040	134.343	1.85209	0.511949	3.61772	0.000297215	0.00614447
AT3G57430	55.2856	2.33289	0.762945	3.05774	0.0022301	0.0275023
AT3G57670	159.486	2.61767	0.460955	5.67879	1.36e-08	2.03e-06
AT3G57830	58.2673	2.85524	0.762325	3.74543	0.000180082	0.00417014
AT3G58650	41.1887	4.07749	0.987354	4.12971	3.63e-05	0.00122766
AT3G59680	122.282	1.64952	0.481124	3.42847	0.000607002	0.010524
AT3G59760	338.032	1.43263	0.319982	4.47721	7.56e-06	0.000361496
AT3G59780	259.372	1.45253	0.426364	3.40677	0.000657362	0.0111941
AT3G59970	1649.61	1.07793	0.271061	3.97672	6.99e-05	0.00200568
AT3G60160	793.498	1.4502	0.306881	4.72561	2.29e-06	0.000137087
AT3G60580	16.6561	5.6157	1.94732	2.88381	0.00392892	0.0414509
AT3G61380	133.808	1.8258	0.471776	3.87005	0.000108812	0.00284827
AT3G62710	176.93	2.2414	0.6632	3.37968	0.000725708	0.0119525
AT3G62960	20.4295	4.29626	1.40219	3.06397	0.00218419	0.0270949
AT3G63140	244.938	1.34615	0.467811	2.87755	0.00400776	0.0420102
AT3G63300	212.922	2.42639	0.583624	4.15745	3.22e-05	0.00112759
AT3G63440	527.064	2.9041	0.446291	6.50718	7.66e-11	2.4e-08
AT4G00050	105.759	2.69743	0.9395	2.87113	0.00409005	0.0425848
AT4G01050	1388.11	1.3203	0.268708	4.9135	8.95e-07	6.37e-05
AT4G01420	48.1669	4.54691	1.06734	4.26005	2.04e-05	0.000803004
AT4G02060	169.367	2.08711	0.580831	3.59332	0.000326495	0.00659461
AT4G02250	38.7239	3.45386	1.22399	2.82181	0.00477534	0.0471127
AT4G02650	67.501	2.49966	0.882374	2.83288	0.00461306	0.0461237
AT4G02810	207.861	7.27228	0.924596	7.86536	3.68e-15	3.52e-12
AT4G03050	1829.05	1.33433	0.31733	4.20486	2.61e-05	0.000962399
AT4G03190	182.417	1.91343	0.449696	4.25493	2.09e-05	0.00081208
AT4G03210	868.572	3.52211	0.451022	7.80917	5.76e-15	5.03e-12
AT4G03290	173.167	2.01486	0.697415	2.88904	0.0038642	0.0409618
AT4G04570	171.24	1.72726	0.588027	2.93738	0.00330996	0.0367149
AT4G05100	137.125	1.53721	0.519552	2.95872	0.0030892	0.0349813
AT4G08685	175.929	1.64779	0.518391	3.17866	0.00147957	0.0203936
AT4G08690	111.018	1.61483	0.560999	2.87848	0.00399593	0.0419374
AT4G09010	339.769	1.46037	0.508081	2.87428	0.00404952	0.0423229
AT4G10380	124.895	1.57956	0.560449	2.81838	0.0048267	0.0475028
AT4G11100	234.62	1.0668	0.362483	2.94302	0.00325026	0.0362934
AT4G11280	538.62	1.61919	0.315608	5.13038	2.89e-07	2.62e-05
AT4G11450	108.067	1.91036	0.494516	3.8631	0.000111958	0.00291164
AT4G12030	138.072	1.70819	0.488963	3.4935	0.000476728	0.00871701
AT4G12620	61.5801	2.74828	0.871714	3.15273	0.00161753	0.0218393
AT4G12730	691.075	3.05863	0.455008	6.72214	1.79e-11	6.53e-09
AT4G12880	173.899	2.92251	0.430225	6.79299	1.1e-11	4.32e-09
AT4G12980	340.207	1.66332	0.327783	5.07447	3.89e-07	3.33e-05
AT4G13660	302.395	1.7469	0.514632	3.39446	0.000687638	0.0114761
AT4G13770	267.172	1.47371	0.413527	3.56377	0.000365569	0.00717451
AT4G13930	1302.47	1.05883	0.331285	3.19612	0.00139288	0.0195014
AT4G14040	259.505	1.78369	0.425794	4.1891	2.8e-05	0.00100767
AT4G14090	40.0111	3.50192	0.982519	3.56423	0.000364928	0.00716894
AT4G14130	726.412	4.12148	0.371071	11.107	1.16e-28	1.16e-24
AT4G14200	146.266	1.95893	0.485686	4.03333	5.5e-05	0.00169074
AT4G14560	102.558	3.73523	0.859106	4.34781	1.38e-05	0.000586117
AT4G14740	247.313	2.05821	0.464912	4.42709	9.55e-06	0.000435816
AT4G15450	282.712	2.07344	0.415685	4.98801	6.1e-07	4.81e-05
AT4G15480	405.323	1.95631	0.365295	5.35543	8.54e-08	9.16e-06
AT4G15830	71.4956	4.53134	0.883974	5.1261	2.96e-07	2.64e-05
AT4G16050	27.6422	5.34307	1.38165	3.86717	0.000110104	0.00287458
AT4G16140	32.7417	6.59927	1.79426	3.67799	0.000235081	0.0051413
AT4G16155	156.071	2.17535	0.542942	4.0066	6.16e-05	0.00182676
AT4G16790	548.679	1.11141	0.34105	3.2588	0.00111885	0.0166517
AT4G16980	448.302	1.1825	0.291999	4.04967	5.13e-05	0.00160973
AT4G17030	5163.78	1.49795	0.3413	4.38896	1.14e-05	0.000500357
AT4G17670	208.902	2.20862	0.442873	4.98703	6.13e-07	4.81e-05
AT4G17880	367.096	2.18753	0.361923	6.04418	1.5e-09	3.05e-07
AT4G18030	818.991	1.31143	0.408417	3.211	0.00132273	0.0188477
AT4G18180	12.3504	6.65214	2.21524	3.0029	0.00267422	0.0315455
AT4G18210	345.725	2.28923	0.336374	6.8056	1.01e-11	4.04e-09
AT4G18220	147.036	3.66197	0.541719	6.7599	1.38e-11	5.33e-09
AT4G18290	60.2855	6.48226	1.32866	4.87878	1.07e-06	7.36e-05
AT4G18390	436.871	1.25121	0.377464	3.31478	0.000917149	0.0141643
AT4G18480	660.283	1.35555	0.441442	3.07074	0.00213531	0.0266774
AT4G18596	134.157	3.2299	0.762688	4.23489	2.29e-05	0.000871134
AT4G18780	306.664	1.3988	0.391846	3.56978	0.000357281	0.00707271
AT4G18840	9.24421	6.22827	2.20577	2.82362	0.00474841	0.0469394
AT4G18970	688.695	2.0028	0.495868	4.03898	5.37e-05	0.00166585
AT4G19170	332.282	2.0726	0.440743	4.70253	2.57e-06	0.000149769
AT4G19230	158.374	2.8019	0.504923	5.54916	2.87e-08	3.77e-06
AT4G20270	1256.86	1.51858	0.295415	5.14051	2.74e-07	2.5e-05
AT4G20320	779.114	2.04807	0.422538	4.84705	1.25e-06	8.44e-05
AT4G21065	10.68	6.4376	2.08926	3.08128	0.00206113	0.0260587
AT4G21180	131.291	1.51792	0.542172	2.7997	0.00511497	0.0496277
AT4G21490	91.6883	3.42122	0.895291	3.82135	0.000132723	0.00330508
AT4G21500	121.02	2.03334	0.475783	4.27368	1.92e-05	0.000768968
AT4G21960	35832.5	1.09577	0.23216	4.71989	2.36e-06	0.000139755
AT4G22160	429.732	1.28428	0.343584	3.73788	0.000185577	0.00426818
AT4G22190	391.086	1.0441	0.371322	2.81184	0.00492596	0.0481962
AT4G22200	55.3837	3.84607	0.837015	4.59498	4.33e-06	0.000232949
AT4G22290	61.9346	3.02792	0.851707	3.55512	0.000377811	0.007343
AT4G22560	149.737	2.18119	0.515376	4.23224	2.31e-05	0.000879809
AT4G22730	241.685	1.47109	0.452657	3.24989	0.00115448	0.0170305
AT4G23020	50.2248	2.47791	0.829093	2.9887	0.0028017	0.0325708
AT4G23340	191.734	2.56054	0.740614	3.45733	0.000545565	0.00973628
AT4G23800	75.4092	2.57221	0.885742	2.90402	0.00368403	0.0396591
AT4G23820	114.594	1.94052	0.490083	3.95956	7.51e-05	0.00211138
AT4G23950	38.8005	2.8164	0.951267	2.96068	0.00306958	0.0348378
AT4G24140	16.7288	7.08998	2.09586	3.38285	0.000717381	0.011825
AT4G24190	3532.35	1.16735	0.330996	3.52678	0.000420646	0.00795227
AT4G25940	10.7682	6.44909	2.09294	3.08135	0.00206066	0.0260587
AT4G26140	169.701	2.07401	0.578488	3.58522	0.00033679	0.0067348
AT4G26540	52.8276	3.51649	0.845924	4.15698	3.22e-05	0.00112796
AT4G26620	373.421	1.2139	0.333248	3.64263	0.000269863	0.00571424
AT4G26660	36.3504	5.74489	1.39833	4.10839	3.98e-05	0.00132155
AT4G26760	109.227	2.30887	0.64748	3.56592	0.000362575	0.00713396
AT4G26790	211.532	1.93281	0.430498	4.48971	7.13e-06	0.000344204
AT4G26990	34.2454	2.85181	1.00485	2.83804	0.00453913	0.0457951
AT4G27240	183.32	1.89864	0.595864	3.18637	0.00144068	0.020017
AT4G27520	1259.19	1.2004	0.285192	4.20911	2.56e-05	0.000946587
AT4G27595	81.7721	2.62039	0.84783	3.0907	0.00199683	0.0254704
AT4G27730	418.642	1.67971	0.382151	4.39542	1.11e-05	0.000487836
AT4G28000	28.0831	7.83653	2.0557	3.81209	0.000137794	0.00340282
AT4G28220	83.8205	2.56923	0.644094	3.9889	6.64e-05	0.00192474
AT4G28250	1538.64	2.23346	0.445993	5.00784	5.5e-07	4.44e-05
AT4G28430	10.2725	6.37942	2.20078	2.89871	0.00374699	0.0402069
AT4G28640	118.955	1.75696	0.521783	3.36722	0.000759296	0.0123321
AT4G28840	225.556	1.74488	0.475826	3.66706	0.000245353	0.00529103
AT4G29720	466.856	1.86567	0.394444	4.72988	2.25e-06	0.000135041
AT4G29920	28.4698	6.40103	1.75961	3.63774	0.000275036	0.00578208
AT4G30020	178.46	1.39231	0.46767	2.97712	0.00290974	0.0334395
AT4G30330	62.3813	2.26743	0.695493	3.26018	0.0011134	0.0165952
AT4G30520	801.552	2.42451	0.417226	5.81104	6.21e-09	1.01e-06
AT4G30680	56.1588	1.99774	0.658937	3.03176	0.00243135	0.02927
AT4G30935	330.206	1.02778	0.332663	3.08954	0.00200468	0.0255542
AT4G31100	13.4404	6.7725	2.00078	3.38493	0.000711955	0.0117646
AT4G31110	19.7085	5.86586	1.86902	3.13848	0.00169829	0.0226461
AT4G31590	268.943	1.31249	0.349137	3.75924	0.00017043	0.00399733
AT4G31610	261.949	1.18878	0.380646	3.12305	0.00178989	0.0235334
AT4G31730	569.476	1.94158	0.482451	4.02441	5.71e-05	0.00173751
AT4G31800	677.647	1.25219	0.291366	4.29764	1.73e-05	0.000702995
AT4G31820	93.7307	4.50629	0.743189	6.06345	1.33e-09	2.82e-07
AT4G31910	714.985	2.08186	0.338954	6.142	8.15e-10	1.82e-07
AT4G32800	70.4355	4.34963	0.799912	5.43764	5.4e-08	6.27e-06
AT4G33110	307.329	1.15186	0.338387	3.40398	0.000664107	0.0112517
AT4G33120	12.2126	6.63639	2.14556	3.09308	0.00198089	0.0253018
AT4G33220	1501.66	1.46695	0.309915	4.73338	2.21e-06	0.000133131
AT4G33790	577.738	2.39976	0.375534	6.39027	1.66e-10	4.62e-08
AT4G33860	24.4974	7.63976	2.04593	3.73412	0.000188374	0.00430751
AT4G34050	3365.95	1.07449	0.218365	4.92059	8.63e-07	6.21e-05
AT4G34138	2972.05	1.77635	0.319012	5.5683	2.57e-08	3.44e-06
AT4G34160	102.691	3.06987	0.837938	3.66361	0.00024869	0.0053515
AT4G34220	316.085	1.19202	0.354946	3.35832	0.000784178	0.0126153
AT4G34250	38.4334	3.43131	1.0772	3.1854	0.00144556	0.0200706
AT4G34410	61.1207	2.007	0.63779	3.1468	0.00165068	0.0221085
AT4G34560	329.926	2.73151	0.451383	6.05143	1.44e-09	3e-07
AT4G34588	958.981	1.98211	0.308852	6.41767	1.38e-10	4.03e-08
AT4G34590	1001.29	1.90603	0.315585	6.03967	1.54e-09	3.1e-07
AT4G34760	64.4101	4.74688	0.979832	4.84459	1.27e-06	8.52e-05
AT4G34980	1751.36	1.61008	0.299882	5.36906	7.91e-08	8.78e-06
AT4G35100	7150.95	1.18911	0.278322	4.27244	1.93e-05	0.000770212
AT4G35180	95.6174	2.33481	0.732407	3.18785	0.00143333	0.0199563
AT4G35350	304.006	2.25383	0.45049	5.00306	5.64e-07	4.5e-05
AT4G35560	240.234	1.27247	0.373274	3.40895	0.000652141	0.0111525
AT4G35700	31.6015	3.9119	1.11566	3.50635	0.000454303	0.00841547
AT4G36160	39.1337	6.86008	1.67727	4.09002	4.31e-05	0.00140128
AT4G36360	398.119	2.1791	0.402358	5.41581	6.1e-08	6.96e-06
AT4G36380	432.598	2.19725	0.387934	5.66399	1.48e-08	2.17e-06
AT4G36490	79.9312	4.53482	1.00543	4.51034	6.47e-06	0.000316172
AT4G36540	81.3388	3.95792	0.739016	5.35566	8.52e-08	9.16e-06
AT4G36880	50.9412	6.23957	1.28064	4.87222	1.1e-06	7.59e-05
AT4G37080	198.166	1.58234	0.483087	3.27548	0.00105481	0.0158534
AT4G37170	15.9511	5.55268	1.9379	2.8653	0.00416612	0.0431176
AT4G37390	40228	3.30153	0.827452	3.98999	6.61e-05	0.00191982
AT4G37450	507.74	1.90739	0.44105	4.32465	1.53e-05	0.000636358
AT4G37490	31.3668	2.83565	0.911752	3.11011	0.00187015	0.0242552
AT4G37590	898.438	1.81996	0.302559	6.01523	1.8e-09	3.43e-07
AT4G37610	2411.63	1.02783	0.224768	4.57284	4.81e-06	0.000251573
AT4G37650	458.726	2.11664	0.374952	5.6451	1.65e-08	2.37e-06
AT4G37890	288.048	3.29373	0.516755	6.37386	1.84e-10	5e-08
AT4G38010	22.6394	3.40521	1.15678	2.9437	0.00324311	0.0362336
AT4G38190	47.9622	7.15836	1.7485	4.094	4.24e-05	0.00138467
AT4G38400	407.447	2.05119	0.477862	4.29242	1.77e-05	0.000715377
AT4G38430	711.328	1.16749	0.330604	3.53139	0.000413378	0.00789666
AT4G38650	15.8072	4.52165	1.51991	2.97494	0.00293046	0.0336007
AT4G38860	79.6757	5.2854	0.856247	6.17274	6.71e-10	1.53e-07
AT4G38970	4134.3	1.33046	0.362364	3.67162	0.000241019	0.00522001
AT4G39330	5628.75	1.36431	0.247783	5.50606	3.67e-08	4.61e-06
AT4G39510	121.815	2.4842	0.64053	3.87835	0.000105169	0.0027746
AT4G39610	67.8551	3.24641	0.936019	3.46831	0.000523744	0.00942223
AT4G39800	637.929	1.19355	0.365629	3.26438	0.00109703	0.0163999
AT4G39970	92.8808	2.28378	0.70949	3.2189	0.00128684	0.0184411
AT4G40060	638.234	1.14047	0.306854	3.71665	0.000201884	0.0045338
AT5G01190	141.327	3.31209	0.738111	4.48726	7.21e-06	0.000347359
AT5G01200	437.439	1.28818	0.33987	3.7902	0.000150523	0.00364103
AT5G01210	1567.06	1.13252	0.395841	2.86105	0.00422237	0.0434954
AT5G01590	399.701	1.89234	0.600408	3.15176	0.00162288	0.0218715
AT5G01600	7994.48	1.10934	0.224218	4.94761	7.51e-07	5.65e-05
AT5G02110	34.7678	8.14418	2.09752	3.88278	0.000103271	0.00273894
AT5G02440	11.1509	6.50107	2.07467	3.13355	0.00172704	0.022887
AT5G02460	129.078	1.37852	0.487399	2.82831	0.00467939	0.046486
AT5G02540	936.878	2.14673	0.485226	4.42418	9.68e-06	0.000440734
AT5G02750	221.259	2.08793	0.697175	2.99484	0.00274588	0.0321565
AT5G03170	591.609	1.33031	0.322567	4.12414	3.72e-05	0.00125354
AT5G03300	552.737	1.49424	0.380416	3.92792	8.57e-05	0.00235486
AT5G03390	83.2298	4.59433	0.838948	5.47629	4.34e-08	5.32e-06
AT5G03680	20.3312	7.36873	1.83984	4.0051	6.2e-05	0.00183573
AT5G03720	49.2826	3.30213	0.850107	3.88437	0.000102594	0.00272819
AT5G03760	131.503	2.97862	0.618861	4.81308	1.49e-06	9.53e-05
AT5G03940	612.532	1.07355	0.372018	2.88573	0.00390503	0.0412396
AT5G04180	165.132	3.51348	0.905875	3.87855	0.000105081	0.0027746
AT5G04230	825.032	1.20283	0.34869	3.44957	0.000561472	0.00993559
AT5G04590	1684.15	1.1031	0.289342	3.81244	0.000137602	0.00340227
AT5G05400	13.2221	6.74907	2.00769	3.36161	0.000774906	0.0124762
AT5G05940	26.6945	7.76304	1.82022	4.26488	2e-05	0.000791131
AT5G06050	209.061	1.60732	0.441587	3.63987	0.000272773	0.00575205
AT5G06390	381.793	1.69256	0.467715	3.61879	0.000295979	0.00613882
AT5G06400	18.5936	7.24256	1.9966	3.62745	0.000286231	0.00596745
AT5G06610	119.9	1.54485	0.500206	3.08842	0.00201223	0.0256018
AT5G06670	61.5549	2.5086	0.714768	3.50967	0.000448657	0.00834818
AT5G06839	392.618	1.64397	0.403922	4.07003	4.7e-05	0.00150044
AT5G06850	461.339	2.07871	0.30772	6.7552	1.43e-11	5.4e-09
AT5G06940	50.0351	3.84108	1.0283	3.73535	0.000187454	0.00429626
AT5G07000	24.1381	7.61435	1.78455	4.26681	1.98e-05	0.000786752
AT5G07260	149.545	1.47337	0.502104	2.93439	0.00334207	0.0369893
AT5G07780	12.6692	6.68481	2.12359	3.14788	0.00164459	0.0220564
AT5G07870	29.1221	4.39766	1.15391	3.81109	0.000138357	0.00340833
AT5G08120	163.218	1.57269	0.444219	3.54034	0.000399608	0.00769956
AT5G08260	865.897	1.96151	0.41178	4.76349	1.9e-06	0.000118999
AT5G08280	593.766	1.02898	0.327138	3.14541	0.00165854	0.022199
AT5G08330	122.892	1.85229	0.620184	2.98668	0.00282025	0.0326918
AT5G08350	445.013	2.36976	0.312643	7.57978	3.46e-14	2.78e-11
AT5G08370	862.702	3.08521	0.441501	6.98801	2.79e-12	1.35e-09
AT5G09530	630.449	1.79484	0.436363	4.11319	3.9e-05	0.00129957
AT5G09650	564.885	1.17668	0.307808	3.82278	0.000131953	0.00329275
AT5G09760	411.856	1.40859	0.418553	3.36538	0.000764374	0.0123684
AT5G09980	112.287	4.4351	0.897433	4.94198	7.73e-07	5.75e-05
AT5G10150	56.2022	3.11805	0.82414	3.78341	0.000154697	0.00371488
AT5G10240	258.33	1.24846	0.411174	3.03633	0.00239477	0.0289115
AT5G10570	14.3675	5.40127	1.91142	2.8258	0.00471634	0.0467144
AT5G10920	422.399	1.03944	0.333529	3.11648	0.00183023	0.0239384
AT5G11550	230.195	1.37342	0.454786	3.01992	0.00252844	0.0301418
AT5G11780	36.9188	5.17343	1.29306	4.00093	6.31e-05	0.00185481
AT5G11890	639.812	1.64961	0.343959	4.79594	1.62e-06	0.000102871
AT5G12180	79.2517	4.53074	1.10445	4.10224	4.09e-05	0.00135112
AT5G12420	208.684	2.71908	0.477693	5.6921	1.25e-08	1.89e-06
AT5G12480	454.393	1.03229	0.336042	3.0719	0.00212704	0.0266238
AT5G13290	162.918	1.38875	0.449813	3.08739	0.00201923	0.0256745
AT5G13520	523.716	1.31779	0.338313	3.89519	9.81e-05	0.00263011
AT5G13630	3557.03	1.30633	0.363265	3.59609	0.000323036	0.00655773
AT5G13770	322.201	2.31409	0.57177	4.04725	5.18e-05	0.00162063
AT5G14060	542.665	1.10293	0.32792	3.36342	0.000769818	0.012423
AT5G14200	596.824	1.90175	0.315895	6.02019	1.74e-09	3.41e-07
AT5G14360	35.7162	3.48548	0.977484	3.56577	0.000362792	0.00713396
AT5G14440	279.339	1.43753	0.427031	3.36633	0.000761764	0.0123537
AT5G15140	58.2491	3.17403	1.04483	3.03784	0.00238281	0.0287844
AT5G15530	337.983	1.71875	0.405713	4.23637	2.27e-05	0.000867043
AT5G15600	45.5153	2.4683	0.87656	2.81589	0.00486419	0.0477547
AT5G16000	65.6301	2.98169	0.977586	3.05006	0.00228798	0.0279926
AT5G16190	36.0144	6.74392	1.75574	3.84108	0.000122495	0.00311307
AT5G16500	21.3027	5.98183	1.90278	3.14373	0.00166807	0.0222968
AT5G16720	92.8702	2.73181	0.590515	4.62614	3.73e-06	0.000206618
AT5G17230	611.455	1.44126	0.477368	3.01918	0.00253462	0.0301546
AT5G17310	143.04	2.39903	0.605288	3.96345	7.39e-05	0.00208607
AT5G17320	13.526	6.7836	2.10343	3.22502	0.00125964	0.0182186
AT5G18090	76.4909	1.92977	0.647266	2.98142	0.00286913	0.0331245
AT5G18240	123.571	2.37957	0.529042	4.49788	6.86e-06	0.00033446
AT5G18500	639.328	1.80087	0.283505	6.35214	2.12e-10	5.68e-08
AT5G18730	12.1882	6.63163	2.05455	3.22778	0.00124755	0.0180715
AT5G18910	62.6727	3.12502	1.10299	2.83323	0.004608	0.0461076
AT5G18930	124.937	2.83011	0.547027	5.17362	2.3e-07	2.16e-05
AT5G19230	70.2686	2.55938	0.81763	3.13025	0.00174661	0.0230853
AT5G19250	435.536	1.06227	0.354829	2.99375	0.00275569	0.0321789
AT5G19310	203.763	1.63075	0.505465	3.22624	0.00125429	0.018156
AT5G19340	12.7109	6.69206	2.0431	3.27545	0.00105495	0.0158534
AT5G19530	318.963	2.01339	0.610573	3.29753	0.000975381	0.0148692
AT5G19670	71.6192	2.64589	0.786543	3.36395	0.000768368	0.0124107
AT5G19730	51.1812	5.65636	1.21892	4.64046	3.48e-06	0.000194954
AT5G19880	52.0678	3.08427	0.796265	3.87342	0.000107321	0.00282025
AT5G20630	52.4441	3.50963	0.878398	3.99548	6.46e-05	0.00189228
AT5G20950	362.549	1.30552	0.325706	4.00827	6.12e-05	0.00181734
AT5G22080	492.421	1.08484	0.332871	3.25903	0.00111793	0.0166504
AT5G22090	1513.32	2.39202	0.298314	8.01846	1.07e-15	1.24e-12
AT5G22580	96.6877	2.96896	0.696451	4.26298	2.02e-05	0.000795647
AT5G22740	389.07	2.3228	0.453504	5.12189	3.02e-07	2.69e-05
AT5G22880	526.335	1.34944	0.366231	3.68466	0.000229012	0.00503326
AT5G22920	1988.95	1.45207	0.217324	6.6816	2.36e-11	8.18e-09
AT5G22940	288.861	1.43524	0.394888	3.63454	0.000278474	0.00583604
AT5G23010	67.7337	5.05076	0.930622	5.42729	5.72e-08	6.56e-06
AT5G23350	88.038	7.03035	1.21859	5.76923	7.96e-09	1.27e-06
AT5G23360	95.4428	6.56252	1.01065	6.49337	8.39e-11	2.59e-08
AT5G23370	169.422	6.97441	0.892799	7.81185	5.64e-15	5.03e-12
AT5G23400	927.517	1.22016	0.33789	3.61111	0.00030489	0.0062718
AT5G23860	311.761	1.38194	0.48447	2.85249	0.00433786	0.0444343
AT5G23940	3379.55	3.26794	0.414432	7.88535	3.14e-15	3.15e-12
AT5G24080	685.778	2.02377	0.37102	5.45462	4.91e-08	5.9e-06
AT5G24105	188.903	2.11534	0.725025	2.91761	0.00352725	0.0384038
AT5G24420	235.581	2.90884	0.554135	5.24933	1.53e-07	1.52e-05
AT5G24530	178.518	1.82591	0.640932	2.84884	0.00438787	0.0447638
AT5G24580	69.4371	6.68998	1.30456	5.12817	2.93e-07	2.63e-05
AT5G25130	451.389	1.35615	0.331627	4.08938	4.33e-05	0.00140288
AT5G25390	521.583	2.49198	0.544433	4.5772	4.71e-06	0.000249454
AT5G25460	56.0379	2.35206	0.722369	3.25603	0.0011298	0.016765
AT5G25620	111.238	2.74459	0.778168	3.52699	0.000420314	0.00795227
AT5G25890	265.4	1.25252	0.434877	2.88017	0.00397464	0.0417576
AT5G26330	85.1132	2.01877	0.65998	3.05884	0.00222196	0.0274801
AT5G26700	337.145	2.00825	0.693065	2.89764	0.00375987	0.040296
AT5G26680	114.24	1.57056	0.540355	2.90654	0.00365448	0.0393833
AT5G26670	45.3228	5.05089	1.07658	4.6916	2.71e-06	0.000157295
AT5G26850	539.922	1.39773	0.394908	3.53937	0.000401084	0.00771222
AT5G27870	75.474	5.47949	1.109	4.94094	7.77e-07	5.75e-05
AT5G28510	268.475	7.64814	1.61898	4.72405	2.31e-06	0.000137733
AT5G28540	4206.53	1.12442	0.319394	3.52047	0.000430775	0.00809801
AT5G28640	258.235	1.07841	0.375607	2.87112	0.00409015	0.0425848
AT5G28680	50.2147	3.8498	1.25022	3.0793	0.00207491	0.0261506
AT5G28690	41.6457	4.10196	1.01957	4.02323	5.74e-05	0.00174161
AT5G28770	295.971	1.16555	0.325247	3.58357	0.000338926	0.00676404
AT5G30495	194.283	1.68179	0.470193	3.5768	0.000347829	0.00691423
AT5G33370	188.816	4.28016	0.766399	5.58476	2.34e-08	3.17e-06
AT5G35670	174.24	4.66226	0.678673	6.86966	6.44e-12	2.71e-09
AT5G35740	15.6658	5.52729	1.88898	2.92606	0.00343281	0.0375793
AT5G37260	59.2986	3.6974	0.734902	5.03115	4.88e-07	4.03e-05
AT5G37300	252.469	1.62474	0.501824	3.23766	0.00120514	0.0175713
AT5G37350	239.857	1.62696	0.420359	3.87041	0.000108653	0.00284827
AT5G37660	101.564	1.8744	0.526709	3.5587	0.0003727	0.00727182
AT5G37730	29.2851	5.42548	1.43985	3.76809	0.000164504	0.00387193
AT5G38010	17.8175	5.71728	1.85583	3.08072	0.00206502	0.026077
AT5G38130	11.3885	6.53037	2.05454	3.17851	0.00148032	0.0203936
AT5G38280	91.9277	1.86255	0.64054	2.90778	0.00364007	0.0392701
AT5G38730	27.2969	5.32855	1.38678	3.8424	0.000121838	0.00310504
AT5G38800	119.962	2.63934	0.519311	5.0824	3.73e-07	3.23e-05
AT5G39380	151.447	2.02092	0.568223	3.55656	0.000375742	0.00731695
AT5G39400	57.3676	8.86661	1.7596	5.03898	4.68e-07	3.9e-05
AT5G39420	82.7967	3.48063	0.941822	3.69564	0.000219334	0.00486069
AT5G39785	89.7028	2.19876	0.654844	3.35768	0.000785982	0.0126342
AT5G39865	23.795	3.04216	1.08687	2.79901	0.00512591	0.0496683
AT5G39880	228.938	2.48813	0.741789	3.35423	0.000795858	0.0127318
AT5G40140	378.317	1.38901	0.347105	4.00171	6.29e-05	0.00185402
AT5G40170	765.946	1.48119	0.413976	3.57797	0.000346274	0.00689698
AT5G40380	301.364	2.93717	0.428032	6.86205	6.79e-12	2.78e-09
AT5G40830	293.968	1.9126	0.434109	4.4058	1.05e-05	0.000467105
AT5G40950	424.34	1.13537	0.397791	2.85419	0.00431472	0.0442682
AT5G41040	151.34	1.69413	0.534471	3.16973	0.0015258	0.0208675
AT5G41060	140.495	3.95454	0.651667	6.06834	1.29e-09	2.76e-07
AT5G41140	63.7024	2.30154	0.639619	3.5983	0.000320301	0.00651539
AT5G41850	64.5217	1.89634	0.650203	2.91654	0.00353936	0.0384803
AT5G42020	2742.7	1.09326	0.317637	3.44185	0.000577755	0.0101218
AT5G42150	188.856	1.2532	0.440384	2.8457	0.00443135	0.0450736
AT5G42180	1665.28	2.35327	0.378864	6.2114	5.25e-10	1.26e-07
AT5G42230	937.544	1.45022	0.281125	5.15865	2.49e-07	2.3e-05
AT5G42280	124.857	1.59905	0.489361	3.26762	0.00108456	0.0162498
AT5G42490	16.9331	4.62071	1.60302	2.88249	0.0039454	0.0415156
AT5G42670	176.637	1.94641	0.502935	3.8701	0.000108792	0.00284827
AT5G42710	28.0078	5.363	1.34866	3.97652	6.99e-05	0.00200568
AT5G42860	62.575	2.04278	0.72896	2.80232	0.0050736	0.0493282
AT5G43020	70.5503	2.51108	0.850356	2.95297	0.0031473	0.0354366
AT5G43300	26.7043	3.66414	1.28472	2.85209	0.00434323	0.044444
AT5G43700	1004.61	5.09699	0.405412	12.5724	3e-36	6.02e-32
AT5G43870	83.6414	2.48508	0.725594	3.4249	0.000615035	0.0106357
AT5G43990	80.0025	2.32622	0.711981	3.26724	0.00108601	0.0162593
AT5G44030	461.887	1.08423	0.305077	3.55395	0.00037949	0.00736849
AT5G44130	431.614	1.97872	0.521776	3.79228	0.000149271	0.00361947
AT5G44210	35.8876	3.33759	1.12092	2.97755	0.00290562	0.0334114
AT5G44380	6217.27	1.52116	0.362278	4.19887	2.68e-05	0.000980056
AT5G44620	529.516	3.73188	0.992259	3.76099	0.00016924	0.00397872
AT5G44630	105.032	4.93613	0.978847	5.0428	4.59e-07	3.85e-05
AT5G44680	143.957	4.04625	0.64263	6.29639	3.05e-10	7.94e-08
AT5G44720	272.499	1.37087	0.432668	3.1684	0.00153281	0.0209491
AT5G44740	38.6135	3.98879	1.08815	3.66566	0.000246697	0.0053143
AT5G45670	424.273	3.2687	0.462512	7.06727	1.58e-12	8.35e-10
AT5G45930	102.673	1.77611	0.543669	3.26689	0.00108737	0.0162677
AT5G45950	71.5188	3.17362	0.799456	3.96973	7.2e-05	0.00205203
AT5G46580	144.621	1.78897	0.497074	3.59899	0.000319454	0.00651135
AT5G46840	430.766	1.19506	0.412442	2.89752	0.00376125	0.040296
AT5G47000	180.57	3.40597	0.800209	4.25635	2.08e-05	0.000810608
AT5G47370	17904.2	1.33182	0.336112	3.96244	7.42e-05	0.00209197
AT5G47800	357.04	1.21963	0.340916	3.5775	0.000346894	0.00690248
AT5G48140	165.266	4.8268	0.856429	5.63596	1.74e-08	2.48e-06
AT5G48360	189.394	2.18125	0.614298	3.55079	0.00038407	0.00745022
AT5G48460	201.871	2.52095	0.550811	4.5768	4.72e-06	0.000249454
AT5G48660	44.8156	3.15907	1.09852	2.87574	0.00403081	0.0421493
AT5G49030	396.46	1.10269	0.362367	3.043	0.00234229	0.0284834
AT5G49040	28.3646	4.78432	1.41173	3.38897	0.000701549	0.0116309
AT5G49690	782.808	1.83136	0.362804	5.04778	4.47e-07	3.77e-05
AT5G49920	128.834	3.0122	0.962472	3.12964	0.00175018	0.0231069
AT5G50010	48.7364	3.51604	0.97725	3.5979	0.000320803	0.00651898
AT5G50011	43.9919	3.35935	1.0021	3.35231	0.000801402	0.0127696
AT5G50030	331.612	4.06619	1.27686	3.18451	0.00144998	0.0201045
AT5G50150	429.034	2.28091	0.425212	5.36418	8.13e-08	8.92e-06
AT5G50420	112.93	1.68432	0.53721	3.13532	0.00171667	0.0228099
AT5G50720	24.6515	4.57432	1.41161	3.24051	0.00119316	0.0174345
AT5G51350	264.115	1.61272	0.426285	3.7832	0.000154824	0.00371488
AT5G51750	1021.06	3.91947	0.36325	10.79	3.84e-27	2.57e-23
AT5G51810	530.165	2.98511	0.527062	5.66368	1.48e-08	2.17e-06
AT5G51850	37.5166	3.1159	0.867852	3.59036	0.000330227	0.00664993
AT5G52060	336.263	1.04066	0.33896	3.07015	0.00213953	0.0267135
AT5G52280	93.8801	1.76445	0.605031	2.91629	0.00354222	0.0384803
AT5G52920	1134.31	1.06726	0.290049	3.67961	0.000233595	0.00511438
AT5G53290	27.9555	4.34093	1.26611	3.42856	0.000606802	0.010524
AT5G53830	710.642	2.10341	0.265034	7.9364	2.08e-15	2.2e-12
AT5G53880	178.479	1.25001	0.418828	2.98455	0.00284	0.0328448
AT5G54095	197.459	2.89097	0.686059	4.21389	2.51e-05	0.000934992
AT5G54200	181.627	1.6083	0.506972	3.17236	0.00151206	0.0207503
AT5G54300	827.924	1.26416	0.371509	3.40276	0.000667077	0.011277
AT5G54510	20335.1	1.06088	0.297146	3.57024	0.000356651	0.0070686
AT5G54670	258.64	1.39718	0.394257	3.54382	0.00039437	0.00762057
AT5G55230	924.513	1.33503	0.308983	4.32073	1.56e-05	0.000641242
AT5G55730	217.332	4.07545	0.593356	6.86848	6.49e-12	2.71e-09
AT5G56000	466.475	1.11515	0.325128	3.42989	0.000603832	0.0104962
AT5G56030	2968.1	1.06007	0.244982	4.32716	1.51e-05	0.000631781
AT5G56320	11.8127	6.58773	2.11681	3.11211	0.00185758	0.0241702
AT5G56530	166.552	1.75239	0.598975	2.92565	0.00343734	0.0376085
AT5G57120	360.005	1.04637	0.349401	2.99476	0.00274665	0.0321565
AT5G57130	137.767	1.91205	0.61067	3.13107	0.0017417	0.0230508
AT5G57160	109.616	1.41825	0.498976	2.84233	0.00447857	0.0453664
AT5G57800	7172.2	1.73862	0.280322	6.20221	5.57e-10	1.3e-07
AT5G58150	25.8616	20.5035	4.40906	4.65033	3.31e-06	0.000187826
AT5G58300	539.743	1.26166	0.30484	4.13876	3.49e-05	0.00119411
AT5G58590	567.177	1.51868	0.376221	4.03666	5.42e-05	0.00167721
AT5G58660	107.505	1.89838	0.563003	3.37187	0.000746588	0.0122096
AT5G58930	411.766	2.05136	0.392423	5.22742	1.72e-07	1.67e-05
AT5G58960	225.802	2.91789	0.52581	5.54933	2.87e-08	3.77e-06
AT5G59370	35.7158	4.70685	1.5186	3.09946	0.00193873	0.0248595
AT5G59480	318.467	1.54077	0.412942	3.7312	0.000190568	0.00433791
AT5G60490	296.417	1.89822	0.574356	3.30496	0.000949909	0.014567
AT5G60650	17.2243	4.64544	1.55585	2.98579	0.00282848	0.0327493
AT5G60930	42.5683	4.365	1.0339	4.22188	2.42e-05	0.000914295
AT5G60960	497.585	1.01935	0.301999	3.37534	0.00073724	0.012097
AT5G61130	176.473	2.0737	0.523121	3.96409	7.37e-05	0.00208335
AT5G61480	671.561	2.3256	0.414557	5.60984	2.03e-08	2.8e-06
AT5G61570	83.3889	2.08106	0.63963	3.25353	0.00113979	0.0169008
AT5G62220	349.535	1.58978	0.39548	4.01988	5.82e-05	0.00176329
AT5G62240	33.9946	8.11108	1.85457	4.37357	1.22e-05	0.000528333
AT5G62430	218.348	2.40119	0.710587	3.37916	0.000727066	0.011965
AT5G62710	80.7976	3.85312	0.719099	5.35827	8.4e-08	9.12e-06
AT5G62890	784.717	1.2598	0.369859	3.40616	0.000658825	0.0112095
AT5G63140	328.392	4.18533	0.417105	10.0342	1.08e-23	3.09e-20
AT5G63490	770.307	1.05104	0.267145	3.93433	8.34e-05	0.00230716
AT5G63530	1136.69	1.40317	0.295234	4.75273	2.01e-06	0.000123976
AT5G63700	39.8933	2.96658	1.02991	2.88044	0.00397126	0.041744
AT5G64320	35.4367	2.38459	0.848191	2.81138	0.00493293	0.0482344
AT5G64580	73.6109	2.00691	0.6187	3.24376	0.00117963	0.0172871
AT5G64940	773.162	1.43851	0.509845	2.82146	0.00478054	0.0471325
AT5G65140	520.842	1.40533	0.412677	3.4054	0.000660666	0.0112218
AT5G65310	233.631	2.54881	0.587053	4.34171	1.41e-05	0.000600102
AT5G65670	7942.09	1.76513	0.319251	5.52896	3.22e-08	4.15e-06
AT5G65683	201.846	1.34481	0.449623	2.99097	0.00278094	0.0323857
AT5G65690	105.434	1.84426	0.543141	3.39554	0.00068494	0.0114504
AT5G66560	534.019	1.83845	0.305375	6.02028	1.74e-09	3.41e-07
AT5G66770	271.862	1.54023	0.390807	3.94116	8.11e-05	0.00225178
AT5G67070	326.195	1.95692	0.424212	4.61306	3.97e-06	0.000217096
AT5G67090	34.919	2.87718	0.898451	3.20238	0.00136297	0.0192486
AT5G67180	292.494	2.04633	0.403131	5.07608	3.85e-07	3.32e-05
AT5G67200	94.0607	3.02086	0.567581	5.32235	1.02e-07	1.08e-05
AT5G67210	169.033	1.60406	0.547719	2.92861	0.00340478	0.0374811
AT5G67270	70.4909	1.96738	0.667521	2.94729	0.00320567	0.0359354
AT5G67460	185.172	1.85854	0.453817	4.09535	4.22e-05	0.00138062
AT5G67470	822.841	1.06139	0.344528	3.0807	0.00206517	0.026077

## Sheet: Auxin_BL_det2_all
DEG in det2-1-/- treated with 2,4-D versus 2,4-D and epi-BL.
Name	baseMean	log2FoldChange	lfcSE	stat	pvalue	padj
AT1G01010	279.718	2.65004	0.233936	11.3281	9.53e-30	1.85e-25
AT1G01020	442.874	2.33868	0.216702	10.7922	3.75e-27	3.64e-23
AT1G01030	416.987	2.71682	0.254872	10.6596	1.57e-26	1.02e-22
AT1G01040	189.157	3.84225	0.381181	10.0799	6.78e-24	3.29e-20
AT1G01050	769.569	1.87086	0.196586	9.51673	1.79e-21	6.93e-18
AT1G01060	155.752	4.03732	0.429554	9.39886	5.52e-21	1.78e-17
AT1G01070	1593.1	2.22124	0.237798	9.34088	9.55e-21	2.65e-17
AT1G01080	534.856	2.7168	0.292261	9.2958	1.46e-20	3.54e-17
AT1G01090	744.716	1.76773	0.191757	9.2186	3.01e-20	6.49e-17
AT1G01100	4427.48	1.45039	0.158682	9.1402	6.23e-20	1.21e-16
AT1G01110	260.221	2.53861	0.278851	9.10385	8.72e-20	1.54e-16
AT1G01120	357.069	2.61539	0.300816	8.6943	3.49e-18	5.64e-15
AT1G01140	248.938	2.23078	0.258273	8.63731	5.76e-18	8.59e-15
AT1G01160	1762.6	2.30218	0.266803	8.62877	6.2e-18	8.59e-15
AT1G01170	231.956	4.51624	0.538724	8.38321	5.15e-17	6.66e-14
AT1G01180	249.593	2.16272	0.264767	8.16842	3.12e-16	3.79e-13
AT1G01190	533.557	1.67016	0.204783	8.15574	3.47e-16	3.96e-13
AT1G01200	3728.23	1.78814	0.221888	8.05878	7.71e-16	8.3e-13
AT1G01210	2396.44	1.56361	0.196417	7.9607	1.71e-15	1.67e-12
AT1G01220	1727.79	1.83895	0.231038	7.9595	1.73e-15	1.67e-12
AT1G01225	381.325	3.17204	0.40207	7.88927	3.04e-15	2.81e-12
AT1G01230	673.011	2.04414	0.259298	7.88337	3.19e-15	2.81e-12
AT1G01240	81.0478	3.68108	0.470518	7.82345	5.14e-15	4.33e-12
AT1G01250	2084.82	2.25546	0.289015	7.80398	6e-15	4.85e-12
AT1G01260	4433.69	2.17264	0.280462	7.74663	9.44e-15	7.32e-12
AT1G01290	400.247	2.00665	0.262167	7.6541	1.95e-14	1.45e-11
AT1G01300	1549.48	1.68983	0.221188	7.63978	2.18e-14	1.56e-11
AT1G01305	776.444	1.66089	0.219307	7.57338	3.64e-14	2.52e-11
AT1G01310	380.733	3.05383	0.405277	7.53516	4.88e-14	3.17e-11
AT1G01320	309.159	2.33797	0.310305	7.53443	4.9e-14	3.17e-11
AT1G01340	471.089	1.72195	0.228927	7.52182	5.4e-14	3.38e-11
AT1G01350	571.218	1.75956	0.234498	7.50349	6.21e-14	3.77e-11
AT1G01355	1646.08	1.86094	0.249276	7.46539	8.31e-14	4.88e-11
AT1G01360	323.73	2.28042	0.306371	7.44334	9.82e-14	5.48e-11
AT1G01370	721.681	1.46913	0.197402	7.44232	9.89e-14	5.48e-11
AT1G01380	137.305	4.23406	0.570095	7.42693	1.11e-13	5.99e-11
AT1G01390	1283.71	1.86559	0.253543	7.35808	1.87e-13	9.78e-11
AT1G01420	383.461	2.37917	0.323852	7.34648	2.03e-13	1.04e-10
AT1G01430	2998.78	2.47946	0.340883	7.27364	3.5e-13	1.74e-10
AT1G01440	352.429	2.5698	0.355963	7.21929	5.23e-13	2.53e-10
AT1G01450	508.799	3.73177	0.517238	7.21481	5.4e-13	2.55e-10
AT1G01453	1244.31	1.83416	0.255204	7.18705	6.62e-13	3.06e-10
AT1G01460	131.472	2.31223	0.326714	7.07724	1.47e-12	6.62e-10
AT1G01470	716.084	1.57782	0.223038	7.0742	1.5e-12	6.62e-10
AT1G01480	1142.19	3.45307	0.488653	7.06649	1.59e-12	6.7e-10
AT1G01490	1624.33	1.64576	0.232881	7.06696	1.58e-12	6.7e-10
AT1G01500	2819.49	-1.9458	0.27592	-7.05205	1.76e-12	7.27e-10
AT1G01510	289.324	2.70351	0.383584	7.04804	1.81e-12	7.33e-10
AT1G01520	500.243	1.40317	0.200452	7.00004	2.56e-12	1.01e-09
AT1G01540	551.356	3.24162	0.464508	6.97861	2.98e-12	1.16e-09
AT1G01550	77.3446	5.48282	0.787895	6.95881	3.43e-12	1.3e-09
AT1G01560	571.509	2.09951	0.302656	6.93695	4.01e-12	1.49e-09
AT1G01570	109.508	2.42869	0.350372	6.93176	4.16e-12	1.52e-09
AT1G01580	1578.68	1.3661	0.197266	6.92517	4.35e-12	1.56e-09
AT1G01590	372.381	2.36866	0.343176	6.90216	5.12e-12	1.81e-09
AT1G01600	10988.7	1.50065	0.217779	6.89072	5.55e-12	1.92e-09
AT1G01610	647.055	1.29021	0.187967	6.86404	6.69e-12	2.28e-09
AT1G01620	2955.13	2.74648	0.401173	6.84612	7.59e-12	2.54e-09
AT1G01630	3030.63	1.53398	0.224231	6.8411	7.86e-12	2.58e-09
AT1G01640	1047.09	1.28186	0.188007	6.81814	9.22e-12	2.98e-09
AT1G01650	1016.57	1.86376	0.275623	6.76201	1.36e-11	4.33e-09
AT1G01660	2033.17	1.58405	0.234696	6.74935	1.49e-11	4.65e-09
AT1G01670	299.06	2.02229	0.300013	6.74067	1.58e-11	4.85e-09
AT1G01680	1131.63	1.92705	0.287897	6.69355	2.18e-11	6.6e-09
AT1G01690	95.0072	2.36779	0.355133	6.66733	2.61e-11	7.76e-09
AT1G01695	308.982	1.68263	0.25248	6.66439	2.66e-11	7.76e-09
AT1G01700	1527.56	1.90373	0.285714	6.66305	2.68e-11	7.76e-09
AT1G01710	1378.2	1.45588	0.219033	6.64685	2.99e-11	8.54e-09
AT1G01720	527.151	1.73568	0.262948	6.60085	4.09e-11	1.14e-08
AT1G01725	805.247	1.87784	0.284499	6.60052	4.1e-11	1.14e-08
AT1G01730	184.453	2.65132	0.403135	6.57675	4.81e-11	1.31e-08
AT1G01740	1535.33	2.79076	0.425259	6.56249	5.29e-11	1.43e-08
AT1G01750	1141.44	1.78291	0.271847	6.55849	5.44e-11	1.44e-08
AT1G01760	3177.59	1.7672	0.270724	6.52768	6.68e-11	1.75e-08
AT1G01770	1474.59	2.08842	0.32162	6.49343	8.39e-11	2.14e-08
AT1G01780	258.921	3.28697	0.50622	6.49318	8.4e-11	2.14e-08
AT1G01790	391.397	2.70984	0.418114	6.48109	9.11e-11	2.29e-08
AT1G01800	235.062	1.90855	0.296015	6.44749	1.14e-10	2.83e-08
AT1G01810	1414.19	1.25687	0.195433	6.43123	1.27e-10	3.08e-08
AT1G01820	239.325	1.75837	0.273431	6.43077	1.27e-10	3.08e-08
AT1G01830	2543.63	0.996473	0.155827	6.39474	1.61e-10	3.85e-08
AT1G01840	4441.4	2.1916	0.342958	6.39029	1.66e-10	3.87e-08
AT1G01860	386.51	1.95618	0.306069	6.3913	1.64e-10	3.87e-08
AT1G01880	74347.2	1.74579	0.27352	6.38267	1.74e-10	4.02e-08
AT1G01900	4337.21	1.42063	0.222913	6.37303	1.85e-10	4.19e-08
AT1G01910	795.666	1.41677	0.222318	6.37271	1.86e-10	4.19e-08
AT1G01920	1117.25	1.36742	0.214655	6.3703	1.89e-10	4.21e-08
AT1G01930	577.193	1.55895	0.244789	6.36855	1.91e-10	4.21e-08
AT1G01940	47.3435	8.20492	1.29273	6.34695	2.2e-10	4.79e-08
AT1G01950	1559.03	1.53002	0.241295	6.34086	2.28e-10	4.92e-08
AT1G01960	972.08	1.8555	0.293741	6.31678	2.67e-10	5.63e-08
AT1G01970	430.92	2.06249	0.326454	6.31786	2.65e-10	5.63e-08
AT1G01980	819.633	1.81229	0.287616	6.30106	2.96e-10	6.16e-08
AT1G01990	835.408	1.74046	0.278543	6.24844	4.15e-10	8.47e-08
AT1G02000	2090.09	1.69818	0.271782	6.24832	4.15e-10	8.47e-08
AT1G02010	1132.09	1.55511	0.250067	6.21877	5.01e-10	1.01e-07
AT1G02020	392.501	1.54459	0.249431	6.19245	5.92e-10	1.18e-07
AT1G02030	392.446	1.53147	0.248214	6.16999	6.83e-10	1.35e-07
AT1G02050	2740.96	1.5201	0.246681	6.16223	7.17e-10	1.41e-07
AT1G02060	1148.95	1.6182	0.263511	6.14092	8.2e-10	1.59e-07
AT1G02065	90.3337	2.56763	0.419292	6.12371	9.14e-10	1.76e-07
AT1G02070	54.9523	3.79133	0.619717	6.11784	9.49e-10	1.8e-07
AT1G02080	1100.16	2.15331	0.352537	6.10805	1.01e-09	1.9e-07
AT1G02090	175.691	3.03081	0.49676	6.10116	1.05e-09	1.96e-07
AT1G02100	605.205	1.9574	0.321679	6.08494	1.17e-09	2.15e-07
AT1G02110	2401.67	-0.995841	0.163716	-6.08273	1.18e-09	2.16e-07
AT1G02120	1352.92	1.33587	0.219824	6.077	1.22e-09	2.22e-07
AT1G02130	1745.05	-1.05244	0.173507	-6.06571	1.31e-09	2.36e-07
AT1G02140	1499.81	1.41958	0.234306	6.05867	1.37e-09	2.44e-07
AT1G02145	1820.16	-1.04702	0.173442	-6.03672	1.57e-09	2.75e-07
AT1G02150	136.911	3.15965	0.523318	6.03772	1.56e-09	2.75e-07
AT1G02160	10877.5	-1.29885	0.215438	-6.02889	1.65e-09	2.86e-07
AT1G02170	2095.51	1.24541	0.206642	6.0269	1.67e-09	2.87e-07
AT1G02180	673.317	1.96132	0.325932	6.01756	1.77e-09	3.01e-07
AT1G02190	189.323	2.03848	0.339164	6.01031	1.85e-09	3.12e-07
AT1G02205	147.848	1.87459	0.312295	6.00261	1.94e-09	3.25e-07
AT1G02220	290684	-1.21579	0.203196	-5.98334	2.19e-09	3.53e-07
AT1G02230	1148.52	1.75101	0.292542	5.98547	2.16e-09	3.53e-07
AT1G02250	3074.9	-1.66267	0.277851	-5.98402	2.18e-09	3.53e-07
AT1G02260	1760.91	1.40275	0.234388	5.98474	2.17e-09	3.53e-07
AT1G02270	186.782	1.9665	0.330115	5.957	2.57e-09	4.12e-07
AT1G02280	732.419	1.59413	0.267684	5.95529	2.6e-09	4.13e-07
AT1G02290	724.066	1.28445	0.216317	5.93784	2.89e-09	4.55e-07
AT1G02300	1895.48	1.23403	0.207957	5.93405	2.96e-09	4.62e-07
AT1G02305	1249.85	1.4128	0.238266	5.92954	3.04e-09	4.71e-07
AT1G02310	3761.83	0.921204	0.155841	5.9112	3.4e-09	5.19e-07
AT1G02330	1293.78	2.4926	0.421794	5.90952	3.43e-09	5.19e-07
AT1G02335	2624.31	-0.890468	0.150729	-5.90773	3.47e-09	5.19e-07
AT1G02340	5901.4	-0.966339	0.163508	-5.91004	3.42e-09	5.19e-07
AT1G02360	16478.7	-1.14135	0.193211	-5.90725	3.48e-09	5.19e-07
AT1G02370	1843.35	2.12281	0.359532	5.90439	3.54e-09	5.24e-07
AT1G02380	512.966	1.96287	0.333106	5.89263	3.8e-09	5.58e-07
AT1G02390	8475.42	1.83749	0.312015	5.88912	3.88e-09	5.66e-07
AT1G02400	2802.8	1.45947	0.248613	5.87045	4.35e-09	6.29e-07
AT1G02405	189.88	1.66632	0.283947	5.86842	4.4e-09	6.32e-07
AT1G02410	4714.87	1.24863	0.212868	5.86575	4.47e-09	6.38e-07
AT1G02420	70.5503	2.64042	0.450337	5.86321	4.54e-09	6.43e-07
AT1G02430	235.278	-2.05896	0.351639	-5.85533	4.76e-09	6.69e-07
AT1G02450	1126.61	1.25709	0.214762	5.8534	4.82e-09	6.72e-07
AT1G02460	231.761	2.33396	0.399455	5.84287	5.13e-09	7.11e-07
AT1G02470	2424.63	1.40336	0.240508	5.83498	5.38e-09	7.4e-07
AT1G02475	161.85	1.83911	0.315919	5.82145	5.83e-09	7.97e-07
AT1G02500	419.761	1.29691	0.222969	5.81654	6.01e-09	8.15e-07
AT1G02520	261.704	1.73414	0.298488	5.80976	6.26e-09	8.43e-07
AT1G02530	2353.77	1.03454	0.178181	5.80615	6.39e-09	8.55e-07
AT1G02560	68.3827	2.43526	0.419682	5.80265	6.53e-09	8.67e-07
AT1G02570	967.514	1.45102	0.250151	5.80056	6.61e-09	8.72e-07
AT1G02575	2761.45	2.00497	0.346726	5.78258	7.36e-09	9.63e-07
AT1G02580	529.666	1.30435	0.225651	5.78041	7.45e-09	9.63e-07
AT1G02610	1034.46	1.71115	0.296026	5.78041	7.45e-09	9.63e-07
AT1G02620	4035.64	0.922567	0.159975	5.76694	8.07e-09	1.04e-06
AT1G02630	699.97	1.15855	0.201095	5.76121	8.35e-09	1.06e-06
AT1G02640	127.795	3.1189	0.541457	5.7602	8.4e-09	1.06e-06
AT1G02650	2091.87	1.8156	0.315818	5.74889	8.98e-09	1.13e-06
AT1G02660	7791.69	-1.02141	0.177691	-5.74824	9.02e-09	1.13e-06
AT1G02670	165.494	2.55426	0.445023	5.7396	9.49e-09	1.18e-06
AT1G02680	240.286	2.74509	0.478308	5.73917	9.51e-09	1.18e-06
AT1G02690	7571.72	-0.906661	0.158121	-5.73398	9.81e-09	1.2e-06
AT1G02700	1455.87	1.00326	0.175029	5.73197	9.93e-09	1.21e-06
AT1G02710	6603.96	-0.946798	0.165323	-5.72696	1.02e-08	1.24e-06
AT1G02720	366.706	1.64232	0.286807	5.72621	1.03e-08	1.24e-06
AT1G02730	460.521	1.82858	0.320148	5.71168	1.12e-08	1.34e-06
AT1G02740	125.23	1.99889	0.350185	5.70808	1.14e-08	1.35e-06
AT1G02750	8367.22	1.6112	0.282218	5.70907	1.14e-08	1.35e-06
AT1G02770	1681.76	2.61033	0.457872	5.70101	1.19e-08	1.4e-06
AT1G02780	2208.01	1.04305	0.183349	5.68889	1.28e-08	1.49e-06
AT1G02790	569.132	-1.52242	0.267791	-5.68512	1.31e-08	1.52e-06
AT1G02800	8959.26	-0.87357	0.153944	-5.6746	1.39e-08	1.6e-06
AT1G02810	91.2087	2.68773	0.473821	5.67247	1.41e-08	1.62e-06
AT1G02816	645.308	1.44953	0.256162	5.65863	1.53e-08	1.74e-06
AT1G02820	4284.48	1.67145	0.295531	5.65575	1.55e-08	1.76e-06
AT1G02840	445.839	1.82451	0.323145	5.64612	1.64e-08	1.85e-06
AT1G02850	1410.29	1.41009	0.249845	5.64386	1.66e-08	1.86e-06
AT1G02860	666.132	1.05602	0.187973	5.61793	1.93e-08	2.15e-06
AT1G02870	385.245	1.7945	0.31953	5.61607	1.95e-08	2.16e-06
AT1G02880	2885.76	1.24043	0.22088	5.61586	1.96e-08	2.16e-06
AT1G02890	3483.16	-1.13234	0.201693	-5.61415	1.98e-08	2.16e-06
AT1G02900	204.341	1.99197	0.354939	5.61216	2e-08	2.18e-06
AT1G02910	23393.7	-1.04107	0.185653	-5.60762	2.05e-08	2.22e-06
AT1G02930	400.993	1.80636	0.322932	5.59363	2.22e-08	2.38e-06
AT1G02940	335.449	1.75685	0.314053	5.59412	2.22e-08	2.38e-06
AT1G02950	3033.94	0.939554	0.168143	5.58783	2.3e-08	2.45e-06
AT1G02960	865.837	1.45822	0.261197	5.58286	2.37e-08	2.5e-06
AT1G02970	597.627	1.51102	0.270686	5.5822	2.37e-08	2.5e-06
AT1G02980	668.199	1.36818	0.24516	5.58077	2.39e-08	2.51e-06
AT1G02990	111.59	1.9949	0.357693	5.57714	2.45e-08	2.55e-06
AT1G03000	110.633	1.96041	0.351686	5.57432	2.49e-08	2.58e-06
AT1G03010	5105.84	1.71526	0.309529	5.54151	3e-08	3.09e-06
AT1G03030	56.1822	2.76594	0.499877	5.53325	3.14e-08	3.23e-06
AT1G03040	43.0938	3.17356	0.573802	5.53076	3.19e-08	3.25e-06
AT1G03050	3918.81	2.07048	0.374587	5.52735	3.25e-08	3.28e-06
AT1G03055	1289.92	1.48742	0.269099	5.52742	3.25e-08	3.28e-06
AT1G03060	1570.19	1.16612	0.211081	5.5245	3.3e-08	3.32e-06
AT1G03070	4264.41	1.117	0.202352	5.52007	3.39e-08	3.39e-06
AT1G03080	129.555	2.73239	0.495402	5.51551	3.48e-08	3.44e-06
AT1G03090	3862.75	-1.04334	0.189166	-5.51547	3.48e-08	3.44e-06
AT1G03100	1984.39	-0.903257	0.163854	-5.51257	3.54e-08	3.48e-06
AT1G03103	2019.23	1.76428	0.320595	5.50315	3.73e-08	3.65e-06
AT1G03106	1133.08	1.65144	0.30033	5.49875	3.82e-08	3.73e-06
AT1G03110	640.345	-2.29411	0.418999	-5.47522	4.37e-08	4.24e-06
AT1G03120	80.5507	4.18637	0.76552	5.46865	4.53e-08	4.38e-06
AT1G03130	2899.6	1.05873	0.193664	5.46681	4.58e-08	4.4e-06
AT1G03140	1131.34	1.01785	0.186229	5.46555	4.61e-08	4.41e-06
AT1G03150	299.298	1.30765	0.240452	5.43831	5.38e-08	5.11e-06
AT1G03160	440.398	1.29274	0.237803	5.43616	5.44e-08	5.15e-06
AT1G03170	4097.72	1.00463	0.185259	5.42284	5.87e-08	5.52e-06
AT1G03180	78.8019	2.36846	0.436995	5.41988	5.96e-08	5.59e-06
AT1G03190	702.568	2.19599	0.406197	5.40622	6.44e-08	5.97e-06
AT1G03200	1088.39	1.14846	0.212405	5.40696	6.41e-08	5.97e-06
AT1G03210	1510.58	1.42062	0.263161	5.39829	6.73e-08	6.13e-06
AT1G03220	208.95	1.85298	0.343228	5.3987	6.71e-08	6.13e-06
AT1G03230	147.543	2.04644	0.379076	5.3985	6.72e-08	6.13e-06
AT1G03250	4885.64	-1.02053	0.188976	-5.40032	6.65e-08	6.13e-06
AT1G03260	28897.6	-0.892765	0.165631	-5.39008	7.04e-08	6.38e-06
AT1G03270	184.892	2.68905	0.500012	5.37796	7.53e-08	6.79e-06
AT1G03280	45.8652	2.65903	0.494647	5.37561	7.63e-08	6.85e-06
AT1G03290	312.21	1.54167	0.287296	5.36614	8.04e-08	7.19e-06
AT1G03300	4369.41	0.831874	0.155123	5.36267	8.2e-08	7.29e-06
AT1G03310	251.72	1.51923	0.283431	5.36015	8.32e-08	7.34e-06
AT1G03330	15219.7	2.30991	0.430956	5.35998	8.32e-08	7.34e-06
AT1G03350	26.8845	4.49504	0.838967	5.35783	8.42e-08	7.39e-06
AT1G03360	281.418	1.36381	0.25462	5.35626	8.5e-08	7.42e-06
AT1G03365	5444.3	1.11944	0.20903	5.35543	8.54e-08	7.42e-06
AT1G03370	419.418	1.73483	0.324055	5.3535	8.63e-08	7.44e-06
AT1G03380	160.054	1.66189	0.310394	5.35413	8.6e-08	7.44e-06
AT1G03390	1841.76	1.88471	0.352273	5.35013	8.79e-08	7.54e-06
AT1G03400	565.186	0.963347	0.180097	5.34905	8.84e-08	7.54e-06
AT1G03410	157.393	2.35984	0.441212	5.34853	8.87e-08	7.54e-06
AT1G03430	1375.29	2.40868	0.45121	5.33827	9.38e-08	7.95e-06
AT1G03440	5404.64	1.56316	0.293093	5.33332	9.64e-08	8.13e-06
AT1G03445	65.3446	3.30802	0.620395	5.33211	9.71e-08	8.15e-06
AT1G03457	140.79	1.8685	0.350884	5.32512	1.01e-07	8.43e-06
AT1G03470	154.989	1.61566	0.303692	5.32006	1.04e-07	8.63e-06
AT1G03475	1084.38	1.00442	0.189095	5.31173	1.09e-07	9e-06
AT1G03495	7063.14	1.68129	0.317122	5.30171	1.15e-07	9.43e-06
AT1G03510	69121.6	-1.00064	0.188728	-5.30203	1.15e-07	9.43e-06
AT1G03520	906.994	4.48683	0.846575	5.29998	1.16e-07	9.48e-06
AT1G03530	1120.62	1.42312	0.268955	5.29131	1.21e-07	9.89e-06
AT1G03540	240.417	-1.26559	0.239212	-5.29065	1.22e-07	9.89e-06
AT1G03550	1383.35	1.60596	0.303692	5.28813	1.24e-07	9.99e-06
AT1G03560	5979.38	-1.03744	0.196252	-5.28624	1.25e-07	1e-05
AT1G03590	280.216	2.30666	0.437182	5.27621	1.32e-07	1.06e-05
AT1G03600	180.566	1.44576	0.274131	5.27398	1.33e-07	1.06e-05
AT1G03610	873.41	2.03883	0.386556	5.27434	1.33e-07	1.06e-05
AT1G03620	5169.92	1.14129	0.216443	5.27293	1.34e-07	1.06e-05
AT1G03630	4012.63	1.64648	0.312433	5.26987	1.37e-07	1.08e-05
AT1G03650	1186.76	1.51628	0.288094	5.26315	1.42e-07	1.11e-05
AT1G03680	1043.57	-1.55271	0.295151	-5.26073	1.43e-07	1.12e-05
AT1G03687	1309.27	1.27377	0.242095	5.26144	1.43e-07	1.12e-05
AT1G03700	3609.06	1.61185	0.306543	5.25814	1.46e-07	1.13e-05
AT1G03710	514.083	-1.11611	0.212506	-5.25214	1.5e-07	1.16e-05
AT1G03720	283.33	1.96884	0.374981	5.25051	1.52e-07	1.17e-05
AT1G03730	1220.82	1.05302	0.200748	5.24548	1.56e-07	1.19e-05
AT1G03740	921.95	1.04765	0.199973	5.23899	1.61e-07	1.23e-05
AT1G03750	823.976	1.80672	0.345698	5.22629	1.73e-07	1.32e-05
AT1G03760	288.292	1.90071	0.363753	5.22529	1.74e-07	1.32e-05
AT1G03770	9976.98	-0.923367	0.176755	-5.224	1.75e-07	1.32e-05
AT1G03780	12512.3	1.79528	0.343629	5.22448	1.75e-07	1.32e-05
AT1G03790	466.419	-1.13955	0.218183	-5.2229	1.76e-07	1.32e-05
AT1G03800	1083.48	1.00916	0.193492	5.21554	1.83e-07	1.36e-05
AT1G03820	8643.11	-1.0368	0.198777	-5.2159	1.83e-07	1.36e-05
AT1G03830	5558.96	-1.37322	0.263305	-5.21533	1.83e-07	1.36e-05
AT1G03840	169.843	2.91695	0.559544	5.21309	1.86e-07	1.37e-05
AT1G03850	52.7224	2.65236	0.508956	5.21138	1.87e-07	1.38e-05
AT1G03860	97.911	2.26443	0.434912	5.20665	1.92e-07	1.41e-05
AT1G03870	318.253	1.57424	0.302612	5.2022	1.97e-07	1.44e-05
AT1G03900	267.091	1.26432	0.243075	5.20136	1.98e-07	1.44e-05
AT1G03905	2589.68	-0.835796	0.160886	-5.19497	2.05e-07	1.48e-05
AT1G03910	2105.74	0.929593	0.179066	5.19134	2.09e-07	1.51e-05
AT1G03920	1210.45	-1.108	0.213619	-5.18681	2.14e-07	1.54e-05
AT1G03930	635.715	1.59885	0.308327	5.18557	2.15e-07	1.54e-05
AT1G03940	599.199	2.11879	0.409865	5.16948	2.35e-07	1.67e-05
AT1G03950	850.281	1.08068	0.209507	5.15819	2.49e-07	1.77e-05
AT1G03960	4054.19	1.52132	0.295246	5.15274	2.57e-07	1.82e-05
AT1G03970	121.046	2.1184	0.411351	5.14987	2.61e-07	1.84e-05
AT1G03980	473.248	1.38928	0.270089	5.1438	2.69e-07	1.89e-05
AT1G03990	47.272	2.80649	0.545722	5.14272	2.71e-07	1.9e-05
AT1G04000	2252.64	2.05093	0.398921	5.1412	2.73e-07	1.9e-05
AT1G04010	38.0421	-4.522	0.879803	-5.13978	2.75e-07	1.91e-05
AT1G04020	4820.25	1.08975	0.212513	5.12791	2.93e-07	2.03e-05
AT1G04030	1001.3	2.54039	0.495743	5.12442	2.98e-07	2.06e-05
AT1G04040	243.237	1.21852	0.238402	5.11117	3.2e-07	2.2e-05
AT1G04050	314.019	1.50438	0.294584	5.1068	3.28e-07	2.25e-05
AT1G04070	695.954	1.34514	0.263554	5.10386	3.33e-07	2.27e-05
AT1G04080	665.636	-1.0883	0.213359	-5.1008	3.38e-07	2.3e-05
AT1G04090	529.145	1.99784	0.392054	5.09583	3.47e-07	2.35e-05
AT1G04100	523.121	1.34998	0.264981	5.09463	3.49e-07	2.36e-05
AT1G04110	26.7567	5.12669	1.00865	5.08272	3.72e-07	2.51e-05
AT1G04120	63862.6	-0.860336	0.169435	-5.07768	3.82e-07	2.56e-05
AT1G04130	4665.31	-1.83948	0.363126	-5.06567	4.07e-07	2.72e-05
AT1G04140	1478.58	1.41555	0.279498	5.06463	4.09e-07	2.73e-05
AT1G04160	329.005	1.7242	0.340594	5.06233	4.14e-07	2.74e-05
AT1G04170	1415.54	1.04483	0.206392	5.06233	4.14e-07	2.74e-05
AT1G04180	578.211	0.887071	0.17553	5.05367	4.33e-07	2.86e-05
AT1G04190	253.255	1.15679	0.228989	5.05174	4.38e-07	2.88e-05
AT1G04200	275.814	2.47425	0.489901	5.05051	4.41e-07	2.89e-05
AT1G04210	144.685	1.50031	0.297324	5.04605	4.51e-07	2.95e-05
AT1G04220	148.877	1.46579	0.291166	5.03423	4.8e-07	3.12e-05
AT1G04230	4759.79	-1.29105	0.256526	-5.03282	4.83e-07	3.13e-05
AT1G04240	366.47	1.05682	0.210037	5.0316	4.86e-07	3.14e-05
AT1G04250	273.181	1.72742	0.343669	5.02643	5e-07	3.22e-05
AT1G04260	1169.09	1.0515	0.209354	5.02261	5.1e-07	3.27e-05
AT1G04270	2260.72	-1.10008	0.219367	-5.01478	5.31e-07	3.4e-05
AT1G04280	938.347	0.967115	0.193033	5.01011	5.44e-07	3.46e-05
AT1G04290	8360.64	-0.93931	0.187487	-5.01001	5.44e-07	3.46e-05
AT1G04300	87.7467	2.44227	0.487936	5.0053	5.58e-07	3.53e-05
AT1G04310	562.48	1.55902	0.311723	5.0013	5.69e-07	3.58e-05
AT1G04330	254.783	1.45786	0.291502	5.00119	5.7e-07	3.58e-05
AT1G04340	7975.22	1.21208	0.242381	5.00071	5.71e-07	3.58e-05
AT1G04350	1518.07	-1.15832	0.231874	-4.99546	5.87e-07	3.67e-05
AT1G04360	2454.32	0.81795	0.163812	4.99321	5.94e-07	3.7e-05
AT1G04380	11186.5	-0.951497	0.190645	-4.99094	6.01e-07	3.73e-05
AT1G04390	6248.88	1.90778	0.38271	4.98491	6.2e-07	3.84e-05
AT1G04400	343.996	1.1077	0.222321	4.98245	6.28e-07	3.88e-05
AT1G04410	2952.15	-0.822381	0.165222	-4.97743	6.44e-07	3.97e-05
AT1G04420	1680.3	0.900582	0.181024	4.97494	6.53e-07	4.01e-05
AT1G04430	1102.04	1.10806	0.223153	4.96545	6.85e-07	4.19e-05
AT1G04440	3220.75	-0.849685	0.171194	-4.96329	6.93e-07	4.22e-05
AT1G04445	2675	-0.818341	0.164895	-4.96281	6.95e-07	4.22e-05
AT1G04470	48.4532	2.83752	0.572004	4.96066	7.03e-07	4.26e-05
AT1G04480	157.84	1.56388	0.316513	4.94096	7.77e-07	4.7e-05
AT1G04490	6373.05	1.99342	0.403606	4.93903	7.85e-07	4.72e-05
AT1G04500	16948.9	1.42274	0.288081	4.93868	7.87e-07	4.72e-05
AT1G04510	225.815	1.79665	0.364355	4.93104	8.18e-07	4.9e-05
AT1G04520	5735.39	2.11239	0.429393	4.91948	8.68e-07	5.18e-05
AT1G04530	1827.11	0.843535	0.171513	4.91819	8.73e-07	5.2e-05
AT1G04540	311.626	1.53229	0.311603	4.91743	8.77e-07	5.2e-05
AT1G04550	164.139	1.95272	0.397143	4.91693	8.79e-07	5.2e-05
AT1G04555	4893.06	1.05413	0.214421	4.91617	8.83e-07	5.2e-05
AT1G04570	495.829	1.17838	0.239731	4.91543	8.86e-07	5.21e-05
AT1G04580	198.615	1.41529	0.287972	4.91469	8.89e-07	5.21e-05
AT1G04590	1393.18	1.0019	0.20399	4.91153	9.04e-07	5.28e-05
AT1G04600	1257.04	-1.1889	0.242125	-4.91026	9.1e-07	5.3e-05
AT1G04610	68.9129	3.7565	0.76515	4.9095	9.13e-07	5.3e-05
AT1G04620	229.721	2.05866	0.419382	4.90879	9.16e-07	5.3e-05
AT1G04630	188.226	-1.86392	0.37984	-4.90711	9.24e-07	5.33e-05
AT1G04635	472.161	1.35363	0.276138	4.90201	9.49e-07	5.46e-05
AT1G04640	209.568	2.43832	0.497772	4.89846	9.66e-07	5.54e-05
AT1G04645	257.351	1.40733	0.287361	4.89742	9.71e-07	5.55e-05
AT1G04650	1531.72	1.87403	0.382896	4.89436	9.86e-07	5.63e-05
AT1G04680	374.473	1.40349	0.286893	4.89203	9.98e-07	5.68e-05
AT1G04690	1194.72	1.54982	0.317089	4.88765	1.02e-06	5.79e-05
AT1G04700	10695.8	-0.901786	0.184599	-4.8851	1.03e-06	5.84e-05
AT1G04710	2686.84	0.928034	0.190045	4.88322	1.04e-06	5.88e-05
AT1G04730	72.9434	2.06613	0.42351	4.87858	1.07e-06	5.99e-05
AT1G04750	695.246	1.30726	0.267965	4.87846	1.07e-06	5.99e-05
AT1G04760	66.3227	-2.35575	0.483389	-4.87342	1.1e-06	6.13e-05
AT1G04770	107.814	3.15805	0.64861	4.86896	1.12e-06	6.25e-05
AT1G04778	268.987	1.205	0.247746	4.86386	1.15e-06	6.4e-05
AT1G04780	1404.53	1.42567	0.293193	4.86256	1.16e-06	6.42e-05
AT1G04790	2248.01	-1.12247	0.230866	-4.86202	1.16e-06	6.42e-05
AT1G04800	519.577	1.2359	0.254226	4.86143	1.17e-06	6.42e-05
AT1G04810	75.5017	2.19957	0.452626	4.85957	1.18e-06	6.46e-05
AT1G04820	6057.03	-0.895257	0.184268	-4.85845	1.18e-06	6.48e-05
AT1G04830	1087.54	1.09107	0.224671	4.85628	1.2e-06	6.53e-05
AT1G04840	179.492	1.35926	0.279917	4.85596	1.2e-06	6.53e-05
AT1G04850	67.9362	2.62129	0.540097	4.85336	1.21e-06	6.59e-05
AT1G04860	141.168	1.61987	0.333988	4.85006	1.23e-06	6.69e-05
AT1G04870	1457.82	1.07968	0.222708	4.84795	1.25e-06	6.74e-05
AT1G04880	597.827	1.36215	0.28114	4.84509	1.27e-06	6.82e-05
AT1G04900	820.36	1.16127	0.239823	4.84219	1.28e-06	6.9e-05
AT1G04910	1408.71	-1.27786	0.264143	-4.83776	1.31e-06	7.02e-05
AT1G04920	113.678	1.71605	0.354696	4.83809	1.31e-06	7.02e-05
AT1G04930	184.697	1.63322	0.337819	4.83459	1.33e-06	7.09e-05
AT1G04945	7037.34	-0.94554	0.195584	-4.83445	1.34e-06	7.09e-05
AT1G04940	355.064	1.59015	0.329065	4.83233	1.35e-06	7.15e-05
AT1G04950	2259.19	0.760608	0.157601	4.82617	1.39e-06	7.35e-05
AT1G04960	533.581	1.97725	0.409803	4.82488	1.4e-06	7.38e-05
AT1G04970	1367.4	1.13188	0.234687	4.82292	1.41e-06	7.43e-05
AT1G04980	293.741	1.46726	0.304292	4.82189	1.42e-06	7.44e-05
AT1G04985	18527	-0.945463	0.196083	-4.82175	1.42e-06	7.44e-05
AT1G04990	231.982	1.51209	0.313701	4.82018	1.43e-06	7.48e-05
AT1G05000	2088.6	-0.867215	0.180045	-4.81667	1.46e-06	7.57e-05
AT1G05010	23.1763	6.26309	1.30024	4.81686	1.46e-06	7.57e-05
AT1G05020	151.064	1.34689	0.279714	4.81523	1.47e-06	7.6e-05
AT1G05030	370.36	2.58482	0.537347	4.81034	1.51e-06	7.77e-05
AT1G05055	86.0304	2.25697	0.469706	4.80507	1.55e-06	7.96e-05
AT1G05060	33.907	4.88342	1.01744	4.79973	1.59e-06	8.15e-05
AT1G05070	384.397	1.45403	0.303097	4.79724	1.61e-06	8.23e-05
AT1G05080	10633	1.10062	0.229484	4.79605	1.62e-06	8.26e-05
AT1G05090	1913.01	0.991035	0.206908	4.78974	1.67e-06	8.5e-05
AT1G05100	318.604	1.18658	0.247789	4.78869	1.68e-06	8.52e-05
AT1G05120	657.356	0.976243	0.204009	4.7853	1.71e-06	8.64e-05
AT1G05140	124.29	1.64617	0.344634	4.77656	1.78e-06	8.98e-05
AT1G05150	6597	-0.809606	0.169483	-4.77692	1.78e-06	8.98e-05
AT1G05160	2739.06	1.11429	0.233383	4.7745	1.8e-06	9.05e-05
AT1G05170	426.312	1.4641	0.307016	4.76881	1.85e-06	9.29e-05
AT1G05180	64.2769	2.05652	0.431714	4.76361	1.9e-06	9.5e-05
AT1G05190	1310.34	1.23052	0.258608	4.75824	1.95e-06	9.71e-05
AT1G05200	2636.07	0.924766	0.194341	4.75846	1.95e-06	9.71e-05
AT1G05205	146.378	-2.20199	0.462827	-4.75768	1.96e-06	9.71e-05
AT1G05210	431.154	1.62383	0.341431	4.75596	1.98e-06	9.77e-05
AT1G05230	105.514	1.97073	0.41449	4.75458	1.99e-06	9.81e-05
AT1G05240	209.728	1.48647	0.312754	4.75283	2.01e-06	9.87e-05
AT1G05260	4405.35	0.872376	0.183763	4.74729	2.06e-06	0.000101113
AT1G05270	538.284	1.18264	0.249135	4.74699	2.06e-06	0.000101113
AT1G05280	635.353	1.22331	0.257923	4.74292	2.11e-06	0.000102904
AT1G05300	1524.29	1.42089	0.299765	4.74002	2.14e-06	0.000103868
AT1G05310	799.136	1.14641	0.241857	4.74002	2.14e-06	0.000103868
AT1G05320	100.756	3.106	0.655377	4.73926	2.14e-06	0.000103994
AT1G05330	406.036	2.3924	0.505107	4.73643	2.18e-06	0.000105193
AT1G05340	194.239	2.43958	0.515726	4.73039	2.24e-06	0.000108104
AT1G05350	612.794	1.59307	0.336897	4.72864	2.26e-06	0.000108768
AT1G05360	235.915	2.41664	0.511375	4.72578	2.29e-06	0.000109962
AT1G05370	3954.19	2.065	0.436999	4.72542	2.3e-06	0.000109962
AT1G05380	138.372	3.10707	0.657699	4.72415	2.31e-06	0.000110375
AT1G05385	68.7088	3.84288	0.813935	4.72136	2.34e-06	0.000111626
AT1G05400	1379.49	1.08235	0.229355	4.71912	2.37e-06	0.000112589
AT1G05410	1074.06	1.08727	0.23047	4.71761	2.39e-06	0.000112597
AT1G05420	361.212	0.969483	0.205501	4.71764	2.39e-06	0.000112597
AT1G05430	15.3942	6.57007	1.39254	4.71804	2.38e-06	0.000112597
AT1G05440	200.4	2.9229	0.619819	4.71573	2.41e-06	0.000113368
AT1G05450	959.766	0.985745	0.209145	4.71322	2.44e-06	0.000114494
AT1G05460	4069.51	-0.978174	0.207838	-4.70642	2.52e-06	0.000118092
AT1G05470	374.953	1.47613	0.313754	4.70473	2.54e-06	0.000118791
AT1G05490	218.936	2.83058	0.602118	4.70104	2.59e-06	0.000120499
AT1G05500	121.618	1.68406	0.358248	4.70083	2.59e-06	0.000120499
AT1G05520	184.554	1.84003	0.392194	4.69164	2.71e-06	0.000125742
AT1G05540	104.298	2.8571	0.609081	4.69084	2.72e-06	0.000125862
AT1G05550	774.465	1.86409	0.397421	4.69047	2.73e-06	0.000125862
AT1G05560	442.955	1.81377	0.386836	4.68873	2.75e-06	0.000126634
AT1G05570	3092.11	1.56455	0.33379	4.68723	2.77e-06	0.000126663
AT1G05575	271.66	1.41399	0.301619	4.68801	2.76e-06	0.000126663
AT1G05580	92.4244	1.77351	0.378359	4.68737	2.77e-06	0.000126663
AT1G05590	5934.21	-0.832302	0.177628	-4.68566	2.79e-06	0.000127338
AT1G05600	7951.58	-1.11423	0.238234	-4.67704	2.91e-06	0.000132491
AT1G05610	485.093	1.22158	0.261489	4.67163	2.99e-06	0.000135714
AT1G05620	1030.55	0.987051	0.211585	4.66503	3.09e-06	0.000139817
AT1G05630	3950.52	-0.822957	0.176441	-4.6642	3.1e-06	0.000140051
AT1G05640	14907.1	-0.923187	0.198014	-4.66222	3.13e-06	0.000141082
AT1G05670	158.467	1.76761	0.379198	4.66145	3.14e-06	0.00014128
AT1G05680	6608.86	1.77529	0.380891	4.66089	3.15e-06	0.00014134
AT1G05690	54.7317	2.35619	0.505792	4.65842	3.19e-06	0.000142712
AT1G05710	624.134	1.34435	0.288886	4.65355	3.26e-06	0.000145788
AT1G05720	360.95	1.25829	0.270507	4.6516	3.29e-06	0.000146168
AT1G05730	762.079	-0.862447	0.185398	-4.65188	3.29e-06	0.000146168
AT1G05750	6591.56	-0.812499	0.17464	-4.65242	3.28e-06	0.000146168
AT1G05760	451.905	1.72663	0.371686	4.64541	3.39e-06	0.000150276
AT1G05770	1044.72	1.95352	0.420801	4.64238	3.44e-06	0.000152124
AT1G05780	1891.81	1.42606	0.307211	4.64194	3.45e-06	0.000152124
AT1G05785	50241.3	-0.800168	0.172602	-4.6359	3.55e-06	0.000155382
AT1G05790	97.0475	3.10067	0.668741	4.63658	3.54e-06	0.000155382
AT1G05805	639.568	1.03824	0.223914	4.63679	3.54e-06	0.000155382
AT1G05810	2554.82	-0.876067	0.188983	-4.63569	3.56e-06	0.000155382
AT1G05820	157.567	1.68088	0.363125	4.62894	3.68e-06	0.000160174
AT1G05830	6982.59	-0.952972	0.206006	-4.62594	3.73e-06	0.000162012
AT1G05835	2290.09	-0.960385	0.207622	-4.62565	3.73e-06	0.000162012
AT1G05840	15095	1.33508	0.288956	4.62037	3.83e-06	0.000165818
AT1G05850	215.4	1.4996	0.325049	4.61346	3.96e-06	0.000170887
AT1G05860	1937.53	-0.875117	0.189699	-4.61319	3.97e-06	0.000170887
AT1G05870	468.52	0.869411	0.188541	4.61126	4e-06	0.0001721
AT1G05890	2079.21	1.38542	0.300477	4.61075	4.01e-06	0.00017214
AT1G05894	2122.73	0.96753	0.209887	4.60977	4.03e-06	0.000172573
AT1G05900	411.978	1.1408	0.247569	4.608	4.07e-06	0.000173667
AT1G05910	1460.58	1.24092	0.269325	4.60751	4.08e-06	0.000173691
AT1G05940	231.205	1.31795	0.286087	4.60683	4.09e-06	0.000173884
AT1G05950	753.733	1.24312	0.269993	4.60429	4.14e-06	0.00017563
AT1G05960	4401.65	1.53837	0.334396	4.60043	4.22e-06	0.000178523
AT1G05970	6321.77	-0.867915	0.188834	-4.59619	4.3e-06	0.000181796
AT1G06000	1256.85	1.09671	0.238927	4.59015	4.43e-06	0.000186731
AT1G06010	93.9038	1.7769	0.387296	4.58796	4.48e-06	0.000188295
AT1G06020	534.443	1.48215	0.323173	4.58623	4.51e-06	0.00018932
AT1G06030	94.2081	1.99366	0.4348	4.58523	4.53e-06	0.00018932
AT1G06040	1039.89	1.72927	0.377157	4.58502	4.54e-06	0.00018932
AT1G06050	2671.44	0.982369	0.214254	4.58507	4.54e-06	0.00018932
AT1G06060	723.189	1.79115	0.390711	4.58434	4.55e-06	0.000189528
AT1G06070	165.397	1.57944	0.344926	4.57906	4.67e-06	0.000193959
AT1G06080	2669.16	1.01273	0.221197	4.57841	4.69e-06	0.000194146
AT1G06090	36.2624	2.21254	0.483534	4.57576	4.74e-06	0.000196204
AT1G06110	1293.64	-0.831036	0.182041	-4.5651	4.99e-06	0.000206004
AT1G06130	611.696	0.855688	0.18749	4.56392	5.02e-06	0.00020672
AT1G06140	735.426	1.36639	0.299884	4.55639	5.2e-06	0.000213486
AT1G06150	212.29	1.39442	0.306044	4.55627	5.21e-06	0.000213486
AT1G06149	13307.4	-0.86492	0.189936	-4.55375	5.27e-06	0.000215607
AT1G06148	28.1261	3.97467	0.873514	4.55021	5.36e-06	0.000218348
AT1G06160	1058.34	0.792686	0.174201	4.5504	5.35e-06	0.000218348
AT1G06170	2741.89	-0.852748	0.187494	-4.54815	5.41e-06	0.000219274
AT1G06180	393.93	2.32796	0.511866	4.54799	5.42e-06	0.000219274
AT1G06190	1013.57	-0.868937	0.191054	-4.54812	5.41e-06	0.000219274
AT1G06200	327.505	1.02815	0.226196	4.54537	5.48e-06	0.000221562
AT1G06210	6882.51	-0.77833	0.171271	-4.54444	5.51e-06	0.000222078
AT1G06220	715.084	0.883996	0.194548	4.54385	5.52e-06	0.000222241
AT1G06230	2284.07	-0.742348	0.163569	-4.53845	5.67e-06	0.000227067
AT1G06240	184.331	1.83747	0.404849	4.53867	5.66e-06	0.000227067
AT1G06250	156.548	1.93712	0.427217	4.53427	5.78e-06	0.000231126
AT1G06260	1404.79	1.38778	0.306593	4.52647	6e-06	0.000239323
AT1G06270	523.612	1.29167	0.285393	4.52595	6.01e-06	0.000239426
AT1G06290	4337.37	-1.06806	0.236139	-4.52301	6.1e-06	0.000242282
AT1G06340	16421.5	-0.888436	0.196602	-4.51896	6.21e-06	0.000246459
AT1G06350	26.5117	3.0289	0.670476	4.51753	6.26e-06	0.000247617
AT1G06380	2730.58	-1.17863	0.260948	-4.51673	6.28e-06	0.000248046
AT1G06390	2825.85	-0.712025	0.157682	-4.51557	6.31e-06	0.000248906
AT1G06400	51.1819	-2.80793	0.62212	-4.51349	6.38e-06	0.000249835
AT1G06410	1880.6	-0.778062	0.17237	-4.51391	6.36e-06	0.000249835
AT1G06420	579.57	1.31878	0.292176	4.51365	6.37e-06	0.000249835
AT1G06430	204.084	1.57069	0.348111	4.51204	6.42e-06	0.000251043
AT1G06440	14428.8	-1.18218	0.262119	-4.51009	6.48e-06	0.000252849
AT1G06450	556.017	1.23969	0.275074	4.50677	6.58e-06	0.000256327
AT1G06460	357.248	1.70424	0.378503	4.50258	6.71e-06	0.000260904
AT1G06470	1470.1	-1.10543	0.245828	-4.49676	6.9e-06	0.000267074
AT1G06475	506.385	0.818458	0.182006	4.49688	6.9e-06	0.000267074
AT1G06490	978.135	0.91596	0.203768	4.49512	6.95e-06	0.000268611
AT1G06500	7320.31	-0.958226	0.213262	-4.49319	7.02e-06	0.00027051
AT1G06515	1341.01	1.27073	0.282858	4.49246	7.04e-06	0.00027091
AT1G06510	2196.23	-0.762262	0.169712	-4.4915	7.07e-06	0.000271593
AT1G06520	53.6899	2.16879	0.482926	4.49093	7.09e-06	0.000271778
AT1G06530	54.9914	2.96984	0.66139	4.4903	7.11e-06	0.000272053
AT1G06540	195.238	2.09053	0.465804	4.48799	7.19e-06	0.000274469
AT1G06550	34.9927	2.39451	0.533761	4.48611	7.25e-06	0.000276355
AT1G06560	452.805	1.71689	0.38298	4.48297	7.36e-06	0.000279913
AT1G06570	2512.11	-0.696095	0.155312	-4.4819	7.4e-06	0.000280764
AT1G06580	467.88	1.04391	0.232956	4.48115	7.42e-06	0.00028121
AT1G06590	1309.84	0.711691	0.158878	4.47948	7.48e-06	0.000282864
AT1G06620	4340.06	0.713088	0.15922	4.47863	7.51e-06	0.000283439
AT1G06630	535.089	1.15493	0.257914	4.47796	7.54e-06	0.000283775
AT1G06640	164.302	2.72241	0.608415	4.4746	7.66e-06	0.000287717
AT1G06645	211428	-0.859034	0.192039	-4.47323	7.7e-06	0.000289007
AT1G06650	26513.9	-0.947324	0.212101	-4.46639	7.96e-06	0.000297825
AT1G06660	263.872	1.54392	0.345916	4.46328	8.07e-06	0.000301014
AT1G06670	424.184	1.10295	0.247107	4.46346	8.06e-06	0.000301014
AT1G06680	21.4144	4.43691	0.994676	4.46066	8.17e-06	0.000304132
AT1G06690	237.447	-1.14213	0.256083	-4.46001	8.2e-06	0.00030447
AT1G06700	4763.53	-0.848544	0.190388	-4.45693	8.31e-06	0.000308293
AT1G06710	489.569	1.21801	0.2734	4.45503	8.39e-06	0.000310439
AT1G06720	1333.33	-1.14948	0.258252	-4.45099	8.55e-06	0.000315742
AT1G06730	59.1349	1.87141	0.420752	4.44776	8.68e-06	0.000319905
AT1G06750	28.1007	3.70817	0.833919	4.44668	8.72e-06	0.000320912
AT1G06760	2915.97	-0.779221	0.175338	-4.44411	8.83e-06	0.000324157
AT1G06770	28991.9	-0.80041	0.180205	-4.44165	8.93e-06	0.00032726
AT1G06780	516.343	1.18459	0.266757	4.4407	8.97e-06	0.000328088
AT1G06790	1613.35	0.967193	0.217825	4.44024	8.99e-06	0.00032818
AT1G06800	816.193	-0.846325	0.190699	-4.43803	9.08e-06	0.000330947
AT1G06820	1088.17	-0.800669	0.180482	-4.43628	9.15e-06	0.000331945
AT1G06830	2609.02	0.943743	0.212738	4.43617	9.16e-06	0.000331945
AT1G06840	376.055	1.59979	0.360607	4.43637	9.15e-06	0.000331945
AT1G06850	4831.71	-1.03027	0.23251	-4.43109	9.38e-06	0.000339231
AT1G06870	10208.6	1.02791	0.232115	4.42844	9.49e-06	0.000342781
AT1G06890	8106	-0.806652	0.182423	-4.42188	9.78e-06	0.000352701
AT1G06900	582.761	-0.972064	0.219913	-4.42023	9.86e-06	0.000354751
AT1G06910	980.002	0.896206	0.202808	4.41899	9.92e-06	0.00035612
AT1G06950	420.669	0.939924	0.212781	4.41733	9.99e-06	0.00035821
AT1G06960	4707.44	-0.950654	0.215266	-4.41618	1e-05	0.000359444
AT1G06970	562.721	-1.14912	0.2603	-4.41462	1.01e-05	0.000361387
AT1G06980	19.039	3.75069	0.850075	4.41218	1.02e-05	0.000364808
AT1G07000	748.061	-0.860265	0.195109	-4.40916	1.04e-05	0.000369263
AT1G07010	2628.09	-1.26626	0.287307	-4.40733	1.05e-05	0.000371706
AT1G07020	248.635	-1.1494	0.260982	-4.40415	1.06e-05	0.000376512
AT1G07030	212.502	1.0378	0.236003	4.39741	1.1e-05	0.00038769
AT1G07040	8757.42	1.80392	0.410322	4.39637	1.1e-05	0.000388149
AT1G07070	5211.7	-0.871868	0.198316	-4.39636	1.1e-05	0.000388149
AT1G07080	32.7797	2.4457	0.55637	4.39582	1.1e-05	0.000388413
AT1G07090	82.776	1.75309	0.398941	4.39437	1.11e-05	0.000389591
AT1G07110	849.201	1.09962	0.250226	4.39449	1.11e-05	0.000389591
AT1G07120	250.995	1.89972	0.432755	4.38984	1.13e-05	0.000397088
AT1G07130	285.316	0.997877	0.227604	4.38426	1.16e-05	0.000406662
AT1G07135	13.153	4.98916	1.13833	4.38288	1.17e-05	0.000408519
AT1G07140	4490.94	-0.920735	0.210256	-4.37912	1.19e-05	0.000414884
AT1G07150	616.056	0.961239	0.21961	4.37702	1.2e-05	0.000417398
AT1G07170	1464.31	-1.64571	0.37596	-4.37734	1.2e-05	0.000417398
AT1G07180	209.374	1.63189	0.372959	4.37551	1.21e-05	0.000419539
AT1G07200	2930.22	1.41916	0.324809	4.3692	1.25e-05	0.000430613
AT1G07210	1183.69	1.16031	0.265575	4.36905	1.25e-05	0.000430613
AT1G07220	1545.87	0.962968	0.220708	4.36308	1.28e-05	0.000441745
AT1G07230	588.896	-1.71034	0.392208	-4.3608	1.3e-05	0.000445578
AT1G07240	5970.77	-0.895765	0.205507	-4.3588	1.31e-05	0.000448881
AT1G07250	19.8929	4.77094	1.09514	4.35647	1.32e-05	0.000452886
AT1G07260	8668.08	-0.764201	0.175537	-4.35351	1.34e-05	0.000458227
AT1G07270	553.634	1.07722	0.247633	4.35005	1.36e-05	0.000464706
AT1G07280	557.886	-1.00299	0.23077	-4.34625	1.38e-05	0.000467367
AT1G07290	22.5388	4.33931	0.998435	4.34611	1.39e-05	0.000467367
AT1G07300	498.638	1.13466	0.260972	4.34783	1.37e-05	0.000467367
AT1G07310	437.762	1.64199	0.377768	4.34656	1.38e-05	0.000467367
AT1G07320	1766.38	1.76944	0.407025	4.34726	1.38e-05	0.000467367
AT1G07350	1436.68	-0.868146	0.199686	-4.34755	1.38e-05	0.000467367
AT1G07360	12948.2	-1.04033	0.239361	-4.34628	1.38e-05	0.000467367
AT1G07370	192.644	-1.30136	0.299685	-4.34242	1.41e-05	0.000474463
AT1G07380	45.9088	3.53231	0.814137	4.33871	1.43e-05	0.000481695
AT1G07390	39.4969	2.56351	0.591361	4.33493	1.46e-05	0.00048921
AT1G07400	93.7167	1.67607	0.386796	4.33322	1.47e-05	0.000492173
AT1G07410	18192.3	-0.806504	0.186153	-4.33249	1.47e-05	0.000492956
AT1G07420	1759.77	-0.904344	0.208837	-4.33038	1.49e-05	0.000494386
AT1G07430	534.95	-0.935679	0.216075	-4.33034	1.49e-05	0.000494386
AT1G07440	182.249	-1.47826	0.341342	-4.33073	1.49e-05	0.000494386
AT1G07450	2012.33	-0.734847	0.169673	-4.33097	1.48e-05	0.000494386
AT1G07460	2446.33	1.16564	0.269296	4.32849	1.5e-05	0.000497716
AT1G07470	1281.08	1.23963	0.286665	4.3243	1.53e-05	0.000506385
AT1G07473	68.4188	1.92449	0.445216	4.32259	1.54e-05	0.000509458
AT1G07480	2151.86	0.780356	0.180636	4.32004	1.56e-05	0.000514517
AT1G07485	2859.14	-1.33138	0.308328	-4.31806	1.57e-05	0.000518071
AT1G07490	834.818	-0.754618	0.17477	-4.31777	1.58e-05	0.000518071
AT1G07510	2639.01	1.03275	0.239317	4.31539	1.59e-05	0.000522791
AT1G07520	1293.65	-1.10601	0.256412	-4.3134	1.61e-05	0.000526645
AT1G07530	2290.26	-0.798997	0.185255	-4.31295	1.61e-05	0.000526814
AT1G07540	13780.7	-0.939857	0.218042	-4.31043	1.63e-05	0.000531957
AT1G07570	241.486	1.50433	0.349032	4.30999	1.63e-05	0.000532122
AT1G07590	1685.17	-0.834148	0.193598	-4.30866	1.64e-05	0.000532724
AT1G07610	1571.16	-0.88313	0.204968	-4.30863	1.64e-05	0.000532724
AT1G07615	303.698	1.55725	0.361373	4.30925	1.64e-05	0.000532724
AT1G07620	7663.92	-0.652123	0.151461	-4.30554	1.67e-05	0.000538162
AT1G07630	1912.13	0.775969	0.180212	4.30586	1.66e-05	0.000538162
AT1G07640	383.188	-0.942819	0.218992	-4.30527	1.67e-05	0.000538162
AT1G07650	1402.23	1.53815	0.357425	4.30341	1.68e-05	0.0005418
AT1G07645	200.328	1.63253	0.379488	4.30192	1.69e-05	0.00054456
AT1G07660	522.018	-1.09761	0.255204	-4.30091	1.7e-05	0.00054614
AT1G07670	1102	1.21037	0.281575	4.29858	1.72e-05	0.000550096
AT1G07700	2223.1	-1.07944	0.251112	-4.29864	1.72e-05	0.000550096
AT1G07705	228.978	1.19878	0.279058	4.29581	1.74e-05	0.000556087
AT1G07710	220.93	1.76609	0.411211	4.29486	1.75e-05	0.000556656
AT1G07720	38022.3	-0.703334	0.163756	-4.29501	1.75e-05	0.000556656
AT1G07725	971.697	0.930593	0.216707	4.29425	1.75e-05	0.000557265
AT1G07740	4644.23	3.09623	0.72143	4.29179	1.77e-05	0.000562154
AT1G07730	790.675	-0.891393	0.207707	-4.29158	1.77e-05	0.000562154
AT1G07745	194.744	1.20417	0.280653	4.29062	1.78e-05	0.00056369
AT1G07750	656.304	-0.87059	0.202969	-4.28929	1.79e-05	0.000566146
AT1G07770	2742.29	-0.863422	0.20132	-4.28881	1.8e-05	0.000566444
AT1G07780	5937.14	1.39141	0.324521	4.28758	1.81e-05	0.00056866
AT1G07790	2310.7	-0.913917	0.213411	-4.28243	1.85e-05	0.000581037
AT1G07795	132.085	2.79778	0.653393	4.28192	1.85e-05	0.000581441
AT1G07810	72.3376	1.83483	0.428586	4.28112	1.86e-05	0.000582578
AT1G07820	5922.2	-0.737662	0.172358	-4.27982	1.87e-05	0.000585069
AT1G07830	4864.09	1.14493	0.267553	4.27927	1.88e-05	0.000585563
AT1G07840	1399.73	-0.828041	0.193656	-4.27584	1.9e-05	0.000592412
AT1G07850	85.7812	1.81652	0.424788	4.27629	1.9e-05	0.000592412
AT1G07870	445.251	-0.867141	0.202811	-4.27561	1.91e-05	0.000592412
AT1G07860	184.926	1.20324	0.281488	4.27459	1.91e-05	0.00059323
AT1G07880	13732.3	-0.814531	0.19055	-4.27463	1.91e-05	0.00059323
AT1G07890	168587	-0.879108	0.205685	-4.27405	1.92e-05	0.000593698
AT1G07900	1469.39	1.1877	0.277943	4.27316	1.93e-05	0.000595126
AT1G07910	6784.19	-0.782503	0.183158	-4.27228	1.93e-05	0.000596533
AT1G07920	10507.8	-0.887646	0.207892	-4.26973	1.96e-05	0.000602432
AT1G07930	449.845	1.19661	0.28042	4.2672	1.98e-05	0.000607396
AT1G07940	570.828	1.27836	0.299558	4.26749	1.98e-05	0.000607396
AT1G07950	3316.17	-0.945217	0.221624	-4.26496	2e-05	0.000612539
AT1G07960	490.116	-0.891805	0.209187	-4.26321	2.02e-05	0.000616402
AT1G07970	105.056	2.98818	0.701174	4.26169	2.03e-05	0.000618844
AT1G07980	1502.87	0.846402	0.19861	4.26162	2.03e-05	0.000618844
AT1G07985	1974.03	1.16094	0.272543	4.25967	2.05e-05	0.000622299
AT1G07990	2716.68	1.02817	0.241367	4.2598	2.05e-05	0.000622299
AT1G08000	282.654	1.19616	0.280906	4.25821	2.06e-05	0.000625389
AT1G08010	1101.22	1.64802	0.38712	4.25712	2.07e-05	0.000626276
AT1G08030	641.973	1.12207	0.263591	4.25685	2.07e-05	0.000626276
AT1G08035	267.054	1.29795	0.304865	4.25744	2.07e-05	0.000626276
AT1G08040	140.005	1.30113	0.305701	4.25623	2.08e-05	0.000627049
AT1G08050	186.299	2.24615	0.527928	4.25466	2.09e-05	0.000627565
AT1G08060	490.174	0.907878	0.213373	4.25489	2.09e-05	0.000627565
AT1G08070	36.99	2.68039	0.629916	4.25516	2.09e-05	0.000627565
AT1G08080	5201.94	-0.845736	0.198765	-4.25495	2.09e-05	0.000627565
AT1G08090	327.456	1.40686	0.330782	4.25313	2.11e-05	0.00063087
AT1G08110	26371.3	0.96156	0.226309	4.24888	2.15e-05	0.000641968
AT1G08125	412.989	1.05284	0.247897	4.24706	2.17e-05	0.000644272
AT1G08130	1041.2	-1.10589	0.260391	-4.24705	2.17e-05	0.000644272
AT1G08140	16407.5	-0.85797	0.202005	-4.24726	2.16e-05	0.000644272
AT1G08150	2492.37	-0.743231	0.175158	-4.24321	2.2e-05	0.00065438
AT1G08160	125.057	-1.34974	0.318166	-4.24224	2.21e-05	0.000656219
AT1G08165	3193.33	1.60749	0.378975	4.24169	2.22e-05	0.000656836
AT1G08170	1689.45	-0.710606	0.167555	-4.24104	2.22e-05	0.000657728
AT1G08180	353.292	0.915839	0.216115	4.23774	2.26e-05	0.000666435
AT1G08190	45488	-0.843914	0.199194	-4.23665	2.27e-05	0.000668682
AT1G08200	3449.73	-0.66686	0.15753	-4.23322	2.3e-05	0.000677914
AT1G08210	508.34	0.933354	0.220501	4.23288	2.31e-05	0.000677915
AT1G08220	931.597	1.29404	0.305776	4.23197	2.32e-05	0.000679635
AT1G08230	605.793	-0.868179	0.205179	-4.23132	2.32e-05	0.00068059
AT1G08250	642.496	-1.35612	0.320747	-4.22801	2.36e-05	0.000689643
AT1G08260	7367.79	1.10206	0.260786	4.2259	2.38e-05	0.000695086
AT1G08270	9.12901	6.80884	1.61267	4.2221	2.42e-05	0.000705843
AT1G08280	590.588	-0.880135	0.208562	-4.22001	2.44e-05	0.000711339
AT1G08290	62.077	2.13027	0.504982	4.21851	2.46e-05	0.000715008
AT1G08300	3709.79	-0.834813	0.197909	-4.21816	2.46e-05	0.000715041
AT1G08310	4034.58	1.11387	0.26433	4.21392	2.51e-05	0.000727532
AT1G08315	1737.83	-0.871433	0.206839	-4.2131	2.52e-05	0.000729085
AT1G08320	1213.95	1.99105	0.472733	4.2118	2.53e-05	0.000732218
AT1G08340	260.83	0.992674	0.235907	4.2079	2.58e-05	0.00074385
AT1G08350	263.886	0.950952	0.226012	4.20753	2.58e-05	0.000743967
AT1G08360	1767.11	0.914346	0.217365	4.20651	2.59e-05	0.000746222
AT1G08370	1459.62	-0.772517	0.183679	-4.20579	2.6e-05	0.000747492
AT1G08380	19696.6	-0.847901	0.20178	-4.2021	2.64e-05	0.000758649
AT1G08390	1212.97	0.94683	0.225369	4.20125	2.65e-05	0.000759262
AT1G08400	309.612	2.41592	0.575046	4.20127	2.65e-05	0.000759262
AT1G08410	4079.18	-0.672165	0.160011	-4.20074	2.66e-05	0.000759845
AT1G08420	373.148	1.27754	0.304464	4.19603	2.72e-05	0.000774685
AT1G08430	1619.66	-0.911992	0.217743	-4.18838	2.81e-05	0.000800082
AT1G08440	51489.4	-0.896287	0.214059	-4.18709	2.83e-05	0.00080344
AT1G08450	796.642	1.35776	0.324327	4.18639	2.83e-05	0.000804769
AT1G08460	547.541	-0.892389	0.213221	-4.18527	2.85e-05	0.000806377
AT1G08465	20.5682	3.03322	0.724692	4.18553	2.85e-05	0.000806377
AT1G08470	88.4538	2.1339	0.510211	4.18239	2.88e-05	0.00081547
AT1G08480	762.592	0.77163	0.184603	4.17994	2.92e-05	0.000823117
AT1G08490	623.357	1.16321	0.278381	4.17847	2.93e-05	0.000827254
AT1G08500	1266.82	1.22645	0.293585	4.17749	2.95e-05	0.00082962
AT1G08510	644.073	-1.17627	0.281689	-4.17577	2.97e-05	0.00083468
AT1G08520	8162.34	-0.614979	0.1473	-4.17502	2.98e-05	0.000836224
AT1G08530	149.065	2.50379	0.599804	4.17435	2.99e-05	0.000837498
AT1G08540	875.202	-1.43433	0.343761	-4.17245	3.01e-05	0.000843273
AT1G08550	1750.79	1.03379	0.247938	4.16955	3.05e-05	0.000852856
AT1G08560	699.185	1.14606	0.274935	4.16847	3.07e-05	0.000855684
AT1G08570	97.8037	2.08946	0.501478	4.16662	3.09e-05	0.000860171
AT1G08580	734.808	1.50602	0.361437	4.16675	3.09e-05	0.000860171
AT1G08590	960.448	1.33367	0.320256	4.16439	3.12e-05	0.000867354
AT1G08600	14.8107	4.10908	0.987405	4.1615	3.16e-05	0.000877129
AT1G08610	136.647	-1.761	0.423211	-4.16105	3.17e-05	0.000877129
AT1G08620	1958.45	0.769688	0.184983	4.16086	3.17e-05	0.000877129
AT1G08630	8283.64	-0.751436	0.180636	-4.15994	3.18e-05	0.000879399
AT1G08640	2877.94	0.89457	0.215158	4.15773	3.21e-05	0.000886705
AT1G08650	5808.54	-1.22086	0.293669	-4.15728	3.22e-05	0.000886769
AT1G08660	29886.6	-0.862711	0.207529	-4.15706	3.22e-05	0.000886769
AT1G08680	1199.93	-0.836602	0.20128	-4.15641	3.23e-05	0.000888033
AT1G08700	177.977	1.94324	0.467615	4.15564	3.24e-05	0.000889782
AT1G08710	547.975	1.21228	0.291813	4.15431	3.26e-05	0.000893041
AT1G08720	357.136	1.01769	0.24498	4.15415	3.26e-05	0.000893041
AT1G08730	6861.95	1.7539	0.422242	4.15378	3.27e-05	0.000893245
AT1G08750	4561.18	-0.940463	0.226544	-4.15135	3.31e-05	0.000900597
AT1G08760	285.293	1.28798	0.310263	4.15126	3.31e-05	0.000900597
AT1G08770	15893.1	1.01146	0.243698	4.15046	3.32e-05	0.000902486
AT1G08780	12639.3	-0.905452	0.218211	-4.14944	3.33e-05	0.000905241
AT1G08800	230.872	0.950425	0.229084	4.1488	3.34e-05	0.000906503
AT1G08810	1910.49	-0.651104	0.15703	-4.14637	3.38e-05	0.000913694
AT1G08820	504.677	1.63309	0.393862	4.14635	3.38e-05	0.000913694
AT1G08830	358.926	-1.06626	0.257201	-4.14561	3.39e-05	0.000915375
AT1G08840	29327.3	-1.03687	0.250144	-4.1451	3.4e-05	0.00091617
AT1G08845	13278.1	-0.84926	0.204963	-4.14348	3.42e-05	0.00092138
AT1G08860	2496.02	-0.733996	0.177246	-4.14112	3.46e-05	0.000929611
AT1G08880	56.363	1.87527	0.452882	4.14075	3.46e-05	0.00092982
AT1G08890	695.771	-0.710529	0.171638	-4.1397	3.48e-05	0.000932812
AT1G08900	403.908	-1.01114	0.244341	-4.13823	3.5e-05	0.000937485
AT1G08910	17470.8	-0.890052	0.215145	-4.13698	3.52e-05	0.000941305
AT1G08920	4754.31	-0.887718	0.214619	-4.13626	3.53e-05	0.000942987
AT1G08930	293.387	1.55421	0.375855	4.13514	3.55e-05	0.000946263
AT1G08940	2156.63	1.17856	0.2851	4.13387	3.57e-05	0.000949638
AT1G08960	7936.12	-0.682957	0.165217	-4.13369	3.57e-05	0.000949638
AT1G08970	990.569	3.31921	0.80367	4.13007	3.63e-05	0.000963413
AT1G08980	10562.1	-0.748488	0.18139	-4.1264	3.68e-05	0.000977562
AT1G08990	617.712	-0.754314	0.18298	-4.12238	3.75e-05	0.00099343
AT1G09000	73.5511	-1.9342	0.469651	-4.11837	3.82e-05	0.00100949
AT1G09010	3835.08	-1.18607	0.288111	-4.11671	3.84e-05	0.00101542
AT1G09020	1256.6	-1.41103	0.342946	-4.11444	3.88e-05	0.00102407
AT1G09040	559.452	-1.29884	0.315758	-4.1134	3.9e-05	0.00102727
AT1G09050	1753.75	1.74762	0.425029	4.11178	3.93e-05	0.00103314
AT1G09060	239.604	0.918287	0.223353	4.11138	3.93e-05	0.00103352
AT1G09070	474.472	0.84202	0.204899	4.10944	3.97e-05	0.00104083
AT1G09080	593.534	1.01923	0.248238	4.10584	4.03e-05	0.00105573
AT1G09100	245.771	1.99238	0.485357	4.10498	4.04e-05	0.00105824
AT1G09130	287.668	-1.16411	0.283784	-4.1021	4.09e-05	0.00107004
AT1G09140	4002.1	1.56259	0.381	4.10128	4.11e-05	0.00107243
AT1G09150	388.295	1.08591	0.264886	4.09954	4.14e-05	0.00107906
AT1G09155	300.471	1.04122	0.254046	4.09854	4.16e-05	0.00108227
AT1G09160	7544.6	1.387	0.338557	4.09681	4.19e-05	0.00108552
AT1G09176	586.411	1.41008	0.344207	4.09661	4.19e-05	0.00108552
AT1G09180	923.923	-1.54748	0.377739	-4.0967	4.19e-05	0.00108552
AT1G09190	145.203	1.62844	0.397424	4.0975	4.18e-05	0.00108552
AT1G09195	723.001	0.966008	0.235844	4.09595	4.2e-05	0.00108713
AT1G09200	998.437	-1.59763	0.390113	-4.09529	4.22e-05	0.00108877
AT1G09210	2353.84	0.88618	0.216457	4.09402	4.24e-05	0.00109331
AT1G09220	4489.01	-0.718304	0.175486	-4.09322	4.25e-05	0.00109563
AT1G09230	9719.79	-0.796565	0.19475	-4.0902	4.31e-05	0.00110854
AT1G09240	537.046	0.823299	0.201317	4.08956	4.32e-05	0.00110947
AT1G09250	2964.82	-0.806548	0.197229	-4.08939	4.33e-05	0.00110947
AT1G09270	499.266	1.13139	0.276726	4.08846	4.34e-05	0.00111244
AT1G09280	2649.4	-0.978806	0.239485	-4.08713	4.37e-05	0.0011174
AT1G09290	21231.1	-0.822382	0.201313	-4.0851	4.41e-05	0.00112572
AT1G09300	40.8766	2.56969	0.629103	4.08469	4.41e-05	0.00112623
AT1G09310	5654.57	-0.691618	0.169403	-4.08269	4.45e-05	0.00113446
AT1G09320	5887.84	-0.942138	0.230888	-4.0805	4.49e-05	0.00114369
AT1G09330	24.9826	3.05395	0.749324	4.0756	4.59e-05	0.00116644
AT1G09340	6875.59	-0.733771	0.180053	-4.07531	4.6e-05	0.00116644
AT1G09350	17624.1	-0.73366	0.180058	-4.07457	4.61e-05	0.00116863
AT1G09370	63470.3	-1.15046	0.282424	-4.07352	4.63e-05	0.0011724
AT1G09380	725.103	-0.867388	0.213014	-4.07198	4.66e-05	0.00117863
AT1G09390	1774.01	-0.722856	0.177584	-4.0705	4.69e-05	0.00118459
AT1G09400	300.219	-1.45699	0.358063	-4.06908	4.72e-05	0.00119031
AT1G09410	807.692	1.24178	0.305253	4.06805	4.74e-05	0.00119399
AT1G09415	5069.59	1.22145	0.300291	4.06757	4.75e-05	0.00119492
AT1G09420	1978.1	1.62963	0.400803	4.06591	4.78e-05	0.0012019
AT1G09430	4938.44	-0.977255	0.240421	-4.06476	4.81e-05	0.00120626
AT1G09440	1187.65	0.952678	0.234643	4.06012	4.9e-05	0.00122893
AT1G09450	1841.46	-0.78759	0.194055	-4.05859	4.94e-05	0.00123542
AT1G09460	801.185	0.698499	0.172118	4.05824	4.94e-05	0.00123564
AT1G09470	1864.26	-0.864175	0.213106	-4.05514	5.01e-05	0.00125055
AT1G09480	2382.2	-0.999177	0.246479	-4.0538	5.04e-05	0.00125611
AT1G09490	1477.91	-0.773045	0.19083	-4.05096	5.1e-05	0.00126981
AT1G09500	43.234	-2.6549	0.655512	-4.05012	5.12e-05	0.00127274
AT1G09510	1753.58	-0.659594	0.162889	-4.04935	5.14e-05	0.00127534
AT1G09520	602.584	-1.00366	0.247913	-4.04841	5.16e-05	0.0012788
AT1G09530	461.244	1.11437	0.2753	4.04784	5.17e-05	0.00128031
AT1G09540	3437.97	-0.6665	0.164669	-4.0475	5.18e-05	0.00128053
AT1G09550	1247.45	-1.19383	0.294987	-4.04705	5.19e-05	0.00128136
AT1G09560	403.725	1.18933	0.293906	4.04663	5.2e-05	0.00128203
AT1G09570	1044.58	-0.998708	0.246871	-4.04546	5.22e-05	0.0012868
AT1G09575	320.879	0.848088	0.209694	4.04441	5.25e-05	0.00129095
AT1G09580	15391.9	-0.782766	0.193643	-4.04233	5.29e-05	0.00130082
AT1G09590	330.135	0.889638	0.220151	4.04104	5.32e-05	0.00130631
AT1G09600	2526.78	1.02147	0.252838	4.04001	5.34e-05	0.00131041
AT1G09610	171.334	1.18492	0.293336	4.03945	5.36e-05	0.00131106
AT1G09620	997.883	-0.961829	0.238118	-4.0393	5.36e-05	0.00131106
AT1G09630	265.164	0.863855	0.213927	4.03808	5.39e-05	0.00131625
AT1G09640	3332.42	-0.739073	0.183147	-4.0354	5.45e-05	0.00132966
AT1G09645	3257.3	-0.618536	0.153299	-4.03483	5.46e-05	0.00133122
AT1G09650	760.05	0.779485	0.193235	4.03388	5.49e-05	0.00133332
AT1G09660	1937.9	-0.608295	0.150797	-4.03387	5.49e-05	0.00133332
AT1G09680	247.169	1.31018	0.324926	4.03225	5.52e-05	0.00134088
AT1G09690	2423.5	-0.788967	0.195799	-4.02947	5.59e-05	0.00135513
AT1G09700	111.085	1.37973	0.342571	4.02759	5.64e-05	0.00136434
AT1G09710	805.463	-0.786866	0.195513	-4.02462	5.71e-05	0.00137995
AT1G09720	51.3659	1.68419	0.418751	4.02193	5.77e-05	0.00139405
AT1G09730	1902.27	-0.725117	0.18049	-4.01749	5.88e-05	0.00141881
AT1G09740	130.294	1.86	0.463234	4.01524	5.94e-05	0.00143061
AT1G09750	2499.05	0.741657	0.184733	4.01476	5.95e-05	0.00143176
AT1G09760	86.8448	2.14252	0.533705	4.01443	5.96e-05	0.00143202
AT1G09770	1444.91	1.00497	0.250404	4.01339	5.99e-05	0.00143653
AT1G09780	739.934	0.767069	0.191187	4.01214	6.02e-05	0.00144015
AT1G09790	4767.52	-0.692483	0.172606	-4.01192	6.02e-05	0.00144015
AT1G09794	1410.06	-1.15334	0.287455	-4.01226	6.01e-05	0.00144015
AT1G09795	3145.48	0.692076	0.172546	4.01095	6.05e-05	0.00144432
AT1G09800	239.574	1.62064	0.404137	4.01013	6.07e-05	0.00144759
AT1G09810	405.519	0.813366	0.202991	4.0069	6.15e-05	0.00146567
AT1G09812	193.582	1.41887	0.354219	4.00563	6.19e-05	0.00147179
AT1G09815	2918.06	-0.841547	0.210161	-4.00429	6.22e-05	0.00147833
AT1G09820	633.773	-0.990599	0.247502	-4.00239	6.27e-05	0.00148661
AT1G09830	493.545	-1.05674	0.264025	-4.00244	6.27e-05	0.00148661
AT1G09840	494.733	1.48408	0.370945	4.00082	6.31e-05	0.00149468
AT1G09850	591.918	1.05572	0.263997	3.99897	6.36e-05	0.00150456
AT1G09860	2894.86	0.821609	0.20553	3.99752	6.4e-05	0.00151201
AT1G09870	541.077	1.78672	0.446994	3.99718	6.41e-05	0.00151229
AT1G09880	10641.5	-0.830405	0.207777	-3.99662	6.43e-05	0.00151403
AT1G09890	4507.39	-0.851157	0.212993	-3.99617	6.44e-05	0.0015151
AT1G09900	583.837	0.969856	0.24282	3.99414	6.49e-05	0.00152626
AT1G09910	12806.1	-0.745355	0.186777	-3.99061	6.59e-05	0.00154727
AT1G09920	476.693	0.830808	0.208283	3.98884	6.64e-05	0.00155702
AT1G09930	384.612	0.883305	0.221659	3.98498	6.75e-05	0.00158064
AT1G09932	1256.54	-1.15587	0.29012	-3.98413	6.77e-05	0.00158439
AT1G09940	1192.24	-0.702367	0.17631	-3.98371	6.78e-05	0.00158527
AT1G09950	9.26328	6.83066	1.71503	3.98282	6.81e-05	0.00158831
AT1G09960	1993.72	-0.618808	0.155375	-3.98268	6.81e-05	0.00158831
AT1G09970	6986.09	-0.79408	0.199433	-3.9817	6.84e-05	0.00159299
AT1G09980	1132.21	1.33829	0.336353	3.97884	6.93e-05	0.00161034
AT1G09995	214.772	1.61734	0.406545	3.97827	6.94e-05	0.00161228
AT1G10010	132.187	-1.31945	0.331747	-3.97728	6.97e-05	0.00161705
AT1G10020	11609.5	-0.820918	0.206437	-3.97661	6.99e-05	0.00161772
AT1G10030	1015.8	-0.87465	0.21994	-3.97676	6.99e-05	0.00161772
AT1G10040	73.3595	5.65864	1.42379	3.97435	7.06e-05	0.00163124
AT1G10050	3228.92	-1.04208	0.26226	-3.97346	7.08e-05	0.00163538
AT1G10060	30.2105	2.5413	0.640089	3.97022	7.18e-05	0.0016558
AT1G10070	3260.01	0.935314	0.235641	3.96923	7.21e-05	0.00166071
AT1G10090	10887.6	0.882773	0.222451	3.96839	7.24e-05	0.00166462
AT1G10095	527.126	1.14236	0.288015	3.96633	7.3e-05	0.00167709
AT1G10110	1528.34	-1.25171	0.31575	-3.96423	7.36e-05	0.00168987
AT1G10120	944.99	-0.664508	0.167652	-3.96362	7.38e-05	0.00169222
AT1G10130	173.077	1.16093	0.29295	3.96288	7.41e-05	0.00169548
AT1G10140	121.36	-1.38182	0.348808	-3.96155	7.45e-05	0.00170291
AT1G10150	2494.44	0.84297	0.212854	3.96032	7.48e-05	0.00170972
AT1G10155	753.395	0.686243	0.173296	3.95994	7.5e-05	0.00171041
AT1G10170	17155.6	-1.294	0.326932	-3.95801	7.56e-05	0.00172232
AT1G10180	306.182	0.837362	0.21158	3.95767	7.57e-05	0.00172269
AT1G10190	238.821	2.15303	0.544163	3.9566	7.6e-05	0.00172843
AT1G10200	698.064	1.03934	0.262705	3.95629	7.61e-05	0.00172865
AT1G10210	990.513	0.96892	0.245097	3.95321	7.71e-05	0.00174902
AT1G10230	24511.8	0.719496	0.182136	3.95032	7.8e-05	0.00176676
AT1G10240	95.1773	2.30189	0.582723	3.95023	7.81e-05	0.00176676
AT1G10270	388.192	-1.31414	0.332751	-3.94933	7.84e-05	0.00176932
AT1G10280	142.835	1.66118	0.420596	3.94958	7.83e-05	0.00176932
AT1G10290	494.461	-1.00794	0.255287	-3.94824	7.87e-05	0.00177521
AT1G10300	636.011	0.871126	0.220651	3.94798	7.88e-05	0.00177521
AT1G10310	17453	0.768393	0.194644	3.94768	7.89e-05	0.00177533
AT1G10320	50196.6	-0.685477	0.173823	-3.94353	8.03e-05	0.00180425
AT1G10330	818.195	1.13731	0.288502	3.94211	8.08e-05	0.00181286
AT1G10340	3265.83	0.678458	0.172145	3.94121	8.11e-05	0.00181574
AT1G10350	174.548	1.52805	0.387714	3.94118	8.11e-05	0.00181574
AT1G10360	48.0469	2.47979	0.629277	3.94069	8.12e-05	0.00181735
AT1G10370	965.437	1.18193	0.300091	3.93858	8.2e-05	0.00183131
AT1G10380	3252.44	1.51259	0.384075	3.93828	8.21e-05	0.00183149
AT1G10385	221.646	1.32802	0.337243	3.93789	8.22e-05	0.00183234
AT1G10390	1557.34	1.48977	0.378398	3.93706	8.25e-05	0.0018366
AT1G10400	1486.65	1.14586	0.291111	3.93615	8.28e-05	0.00184141
AT1G10410	4816.06	-0.768581	0.195315	-3.93508	8.32e-05	0.00184756
AT1G10417	2416.7	-0.881533	0.22424	-3.9312	8.45e-05	0.00187329
AT1G10430	420.138	1.14043	0.290082	3.93142	8.44e-05	0.00187329
AT1G10450	501.557	-1.02536	0.260865	-3.93063	8.47e-05	0.00187404
AT1G10460	14013.1	-0.736998	0.187505	-3.93056	8.47e-05	0.00187404
AT1G10470	2029.06	-0.599737	0.152638	-3.92913	8.53e-05	0.00188303
AT1G10480	2156.66	-0.669014	0.170292	-3.92863	8.54e-05	0.00188327
AT1G10490	320.604	-1.03736	0.264055	-3.92856	8.55e-05	0.00188327
AT1G10500	1583.81	1.12156	0.285586	3.92721	8.59e-05	0.00189166
AT1G10510	15.1978	4.46357	1.13711	3.92537	8.66e-05	0.00190191
AT1G10520	8063.15	0.913512	0.232717	3.92543	8.66e-05	0.00190191
AT1G10522	616.995	-0.764963	0.195021	-3.92246	8.76e-05	0.00191915
AT1G10530	32.1966	2.93036	0.747087	3.92238	8.77e-05	0.00191915
AT1G10540	3020.87	-0.808777	0.206186	-3.92256	8.76e-05	0.00191915
AT1G10550	10830.4	-0.727122	0.185479	-3.92025	8.85e-05	0.00193399
AT1G10560	772.066	-0.836408	0.213382	-3.91978	8.86e-05	0.00193562
AT1G10570	12270.2	0.725838	0.185271	3.91771	8.94e-05	0.00194917
AT1G10580	11850.8	-0.845478	0.215818	-3.91755	8.95e-05	0.00194917
AT1G10585	101.178	1.49204	0.381019	3.91591	9.01e-05	0.0019603
AT1G10588	808.932	-1.05175	0.26862	-3.91537	9.03e-05	0.00196248
AT1G10590	848.232	1.12716	0.287919	3.91485	9.05e-05	0.0019645
AT1G10600	3513.55	0.954444	0.243844	3.91416	9.07e-05	0.00196632
AT1G10610	41.2083	2.12472	0.542867	3.91389	9.08e-05	0.00196632
AT1G10620	655.695	1.59366	0.407188	3.91382	9.08e-05	0.00196632
AT1G10630	128.924	1.47588	0.37716	3.91313	9.11e-05	0.00196972
AT1G10640	326.057	1.09173	0.27908	3.91191	9.16e-05	0.00197549
AT1G10650	4006.14	-0.722027	0.184572	-3.91189	9.16e-05	0.00197549
AT1G10657	1373.78	0.941146	0.240632	3.91115	9.19e-05	0.00197932
AT1G10660	1198.05	-0.967212	0.247396	-3.90956	9.25e-05	0.00198794
AT1G10670	3322.39	1.2909	0.330188	3.90959	9.25e-05	0.00198794
AT1G10680	120.318	1.70343	0.43576	3.90911	9.26e-05	0.00198945
AT1G10690	259.303	1.00886	0.258175	3.90767	9.32e-05	0.00199919
AT1G10700	114.107	1.45785	0.373192	3.90644	9.37e-05	0.00200716
AT1G10710	1537.25	-0.886841	0.227121	-3.90472	9.43e-05	0.00201926
AT1G10717	2029.13	-0.658871	0.168758	-3.90423	9.45e-05	0.00202113
AT1G10720	1242.59	-0.909629	0.233093	-3.90242	9.52e-05	0.00203401
AT1G10730	6661.97	-0.747291	0.191538	-3.90152	9.56e-05	0.00203937
AT1G10740	202236	-0.70493	0.1807	-3.9011	9.58e-05	0.00204064
AT1G10745	444.504	0.982359	0.251856	3.90048	9.6e-05	0.00204368
AT1G10750	240.62	-1.35908	0.34853	-3.89946	9.64e-05	0.00205006
AT1G10760	138.422	1.9904	0.510587	3.89826	9.69e-05	0.00205797
AT1G10770	1606.78	-0.701371	0.180052	-3.89539	9.8e-05	0.00208
AT1G10780	313.871	1.18128	0.303271	3.89515	9.81e-05	0.00208
AT1G10790	1894.42	-1.00972	0.25931	-3.89389	9.87e-05	0.00208857
AT1G10800	371.86	-0.763909	0.196249	-3.89255	9.92e-05	0.00209785
AT1G10810	2881.84	-0.622973	0.160062	-3.89207	9.94e-05	0.0020997
AT1G10820	92.1797	-1.29816	0.333578	-3.89161	9.96e-05	0.00210137
AT1G10830	146.517	-5.74997	1.47768	-3.89121	9.97e-05	0.00210255
AT1G10840	2476.33	0.653831	0.168059	3.89048	0.000100044	0.00210658
AT1G10850	1702.3	0.72725	0.186963	3.88981	0.000100324	0.00211017
AT1G10865	979.777	0.823062	0.211799	3.88606	0.000101885	0.0021407
AT1G10870	1185.8	2.90277	0.747115	3.8853	0.000102202	0.00214502
AT1G10890	513.669	-0.723139	0.186318	-3.88121	0.000103939	0.00217912
AT1G10900	33.7172	-2.70794	0.697892	-3.88018	0.000104379	0.00218579
AT1G10910	657.358	0.879205	0.226603	3.87994	0.000104483	0.00218579
AT1G10920	139.238	1.90106	0.490056	3.87927	0.000104769	0.00218943
AT1G10930	5210.51	-0.686041	0.177019	-3.87552	0.000106397	0.00222104
AT1G10940	215.455	1.95473	0.504471	3.87481	0.000106707	0.00222274
AT1G10950	3666.92	-0.668326	0.17247	-3.87502	0.000106617	0.00222274
AT1G10960	852.376	0.839122	0.2166	3.87407	0.000107034	0.00222716
AT1G10970	3163.37	1.467	0.378718	3.87358	0.000107246	0.0022286
AT1G10980	52.6665	1.74513	0.450543	3.87339	0.000107333	0.0022286
AT1G10990	156.222	1.33636	0.345107	3.8723	0.000107814	0.00223618
AT1G11000	150.411	1.43776	0.371319	3.87204	0.00010793	0.0022362
AT1G11020	5808.13	-0.955725	0.246848	-3.87172	0.000108071	0.00223674
AT1G11050	2048.68	-0.772958	0.199668	-3.87121	0.000108296	0.00223901
AT1G11060	1081.22	-0.681777	0.176133	-3.87081	0.000108474	0.00223997
AT1G11070	168.598	1.05718	0.273131	3.87059	0.000108574	0.00223997
AT1G11080	518.986	1.31036	0.338569	3.87028	0.000108712	0.00224044
AT1G11090	200.102	2.28366	0.590115	3.86985	0.000108901	0.00224196
AT1G11100	3123.42	0.904877	0.233928	3.86819	0.000109647	0.00225289
AT1G11120	3379.51	-0.942644	0.243694	-3.86815	0.000109665	0.00225289
AT1G11125	417.009	-0.768587	0.198765	-3.86681	0.000110269	0.00226291
AT1G11130	116.066	1.47641	0.381865	3.8663	0.0001105	0.00226524
AT1G11160	1125.52	0.876484	0.226919	3.86255	0.00011221	0.00229788
AT1G11170	8640.67	-0.710898	0.184128	-3.8609	0.000112972	0.00230618
AT1G11180	2434.44	0.901619	0.233522	3.86097	0.000112939	0.00230618
AT1G11190	4560.67	-0.697351	0.180596	-3.86139	0.000112742	0.00230618
AT1G11200	3353.23	-1.05363	0.273004	-3.8594	0.000113667	0.00231792
AT1G11210	679.011	0.803301	0.208188	3.85853	0.000114071	0.00232372
AT1G11220	2129.71	1.06179	0.275257	3.85743	0.000114583	0.0023317
AT1G11240	2712.11	0.822491	0.213271	3.85654	0.000115001	0.00233776
AT1G11260	725.947	0.917757	0.238004	3.85606	0.000115228	0.00233992
AT1G11270	3098.16	-0.588526	0.15265	-3.8554	0.000115539	0.00234377
AT1G11290	64.45	2.11443	0.548532	3.8547	0.00011587	0.00234803
AT1G11300	510.723	-0.775995	0.201348	-3.85399	0.000116207	0.0023524
AT1G11310	330.194	1.74596	0.453242	3.85216	0.000117083	0.00236766
AT1G11320	138.938	1.27274	0.330504	3.85091	0.00011768	0.00237725
AT1G11330	114.092	1.64834	0.428088	3.85047	0.000117894	0.00237909
AT1G11350	489.651	1.309	0.340066	3.84926	0.000118477	0.00238838
AT1G11360	596.407	1.12673	0.292735	3.84899	0.000118604	0.00238847
AT1G11362	145.021	1.31087	0.340755	3.84694	0.0001196	0.00240603
AT1G11370	768.766	-1.20819	0.314306	-3.84401	0.000121039	0.00242993
AT1G11380	888.188	1.16016	0.301799	3.84414	0.000120977	0.00242993
AT1G11390	1081.59	1.02232	0.266111	3.84173	0.000122172	0.0024476
AT1G11400	221.316	1.10523	0.287682	3.84183	0.00012212	0.0024476
AT1G11410	151.629	-1.27378	0.331768	-3.83938	0.000123344	0.00246853
AT1G11420	2561.42	0.937249	0.244152	3.8388	0.000123638	0.00247188
AT1G11430	97.7984	1.36582	0.355969	3.8369	0.000124597	0.00248848
AT1G11440	25.719	2.2406	0.584108	3.83594	0.000125085	0.00249566
AT1G11475	1922.01	-0.606188	0.158114	-3.83386	0.00012615	0.00251173
AT1G11480	32.6623	3.20398	0.835704	3.83387	0.000126141	0.00251173
AT1G11490	8792.71	-0.662324	0.172813	-3.8326	0.000126796	0.00251784
AT1G11500	119.227	5.20645	1.3585	3.8325	0.000126846	0.00251784
AT1G11510	50.5331	1.90169	0.496165	3.83277	0.000126706	0.00251784
AT1G11530	3073.27	0.881125	0.229967	3.83153	0.000127348	0.00252522
AT1G11540	2835.36	1.61128	0.420629	3.83065	0.000127805	0.00253169
AT1G11545	1230.55	0.960995	0.251016	3.82842	0.000128969	0.00255214
AT1G11560	550.081	0.797729	0.20842	3.8275	0.000129451	0.00255906
AT1G11570	6897.81	1.22205	0.319401	3.82608	0.000130201	0.00257113
AT1G11572	250.083	1.09824	0.287059	3.82584	0.000130326	0.00257113
AT1G11580	1003.35	-0.830829	0.217287	-3.82365	0.000131489	0.00258911
AT1G11590	70.2963	1.79401	0.469192	3.82362	0.000131505	0.00258911
AT1G11593	1520.28	0.855338	0.223719	3.82328	0.00013169	0.00259013
AT1G11600	366.496	1.52579	0.399398	3.82024	0.000133324	0.0026196
AT1G11630	1880.04	0.593857	0.155475	3.81963	0.000133649	0.00262334
AT1G11650	6811.31	-0.65037	0.170295	-3.81907	0.000133954	0.00262584
AT1G11660	8113.35	-0.691984	0.1812	-3.8189	0.000134048	0.00262584
AT1G11670	23395.7	-0.897412	0.235103	-3.81711	0.000135025	0.00264232
AT1G11680	9322.7	-0.838723	0.219764	-3.81647	0.000135373	0.00264645
AT1G11690	112.466	1.67633	0.43931	3.81583	0.000135728	0.00265041
AT1G11700	265.859	1.04479	0.27382	3.81561	0.000135848	0.00265041
AT1G11710	4140.01	-0.651105	0.170676	-3.81487	0.000136256	0.00265569
AT1G11720	776.933	0.672434	0.176296	3.81424	0.000136603	0.00265977
AT1G11730	718.01	-0.89538	0.234796	-3.81344	0.000137047	0.00266265
AT1G11740	754.023	1.28517	0.337029	3.81323	0.000137162	0.00266265
AT1G11750	1744.55	-0.700338	0.183641	-3.81363	0.000136941	0.00266265
AT1G11755	213.133	1.49591	0.39246	3.81161	0.000138062	0.00267743
AT1G11760	115.904	2.03038	0.532835	3.81053	0.00013867	0.00268654
AT1G11765	1248.93	-0.634272	0.166526	-3.80885	0.000139616	0.00270218
AT1G11770	709.598	-0.740697	0.194501	-3.80819	0.000139988	0.00270667
AT1G11780	13914.8	-0.621532	0.163254	-3.80715	0.000140578	0.00271266
AT1G11785	45.6335	1.91008	0.501677	3.80739	0.000140442	0.00271266
AT1G11790	3462.19	-0.601109	0.157915	-3.80653	0.000140928	0.00271672
AT1G11800	860.445	0.77803	0.204489	3.80475	0.000141946	0.00273362
AT1G11820	1720.88	-0.748157	0.19666	-3.80432	0.000142193	0.00273528
AT1G11840	990.351	0.853953	0.224481	3.80411	0.000142314	0.00273528
AT1G11850	246.691	1.7528	0.460977	3.80236	0.000143324	0.00275196
AT1G11860	998.519	1.12538	0.296016	3.80176	0.000143674	0.00275595
AT1G11870	3490.53	-0.939904	0.24727	-3.80113	0.000144039	0.00276022
AT1G11880	638.697	1.45777	0.383581	3.80043	0.000144446	0.00276357
AT1G11890	1616.96	0.915337	0.24086	3.80029	0.000144527	0.00276357
AT1G11900	429.528	-0.886948	0.233402	-3.80009	0.000144641	0.00276357
AT1G11905	1098.94	-0.868794	0.228739	-3.79819	0.000145754	0.00277936
AT1G11910	2468.96	-0.622498	0.16389	-3.79826	0.000145715	0.00277936
AT1G11915	507.808	-0.732521	0.192879	-3.79783	0.000145966	0.00278067
AT1G11925	310.403	-1.01165	0.266656	-3.79383	0.000148342	0.00282316
AT1G11930	444.895	0.777143	0.204897	3.79284	0.000148932	0.00283161
AT1G11940	4021.61	-0.717229	0.189326	-3.78833	0.000151661	0.00287828
AT1G11950	4093.37	0.888669	0.234583	3.7883	0.000151684	0.00287828
AT1G11960	4262.8	-1.00215	0.264575	-3.78777	0.000152005	0.00288156
AT1G12000	845.845	1.00457	0.265242	3.78736	0.000152256	0.00288349
AT1G12010	4942.38	1.12024	0.295925	3.78556	0.000153362	0.0029016
AT1G12020	2061.55	1.02069	0.269699	3.78455	0.000153985	0.00290773
AT1G12050	1206.71	-0.772778	0.204185	-3.78469	0.000153901	0.00290773
AT1G12060	149.057	-1.12127	0.296359	-3.7835	0.000154637	0.00291719
AT1G12080	340.869	0.970358	0.256565	3.78212	0.000155499	0.0029306
AT1G12090	515.82	1.09618	0.289885	3.78143	0.000155933	0.00293592
AT1G12110	1375.37	0.722546	0.191118	3.78063	0.000156431	0.00294244
AT1G12120	60.0206	2.60416	0.688964	3.77983	0.000156938	0.00294912
AT1G12140	697.632	1.84907	0.489867	3.77464	0.000160238	0.00300823
AT1G12150	6053.17	0.92331	0.244719	3.77293	0.000161338	0.00302595
AT1G12160	779.476	1.6288	0.431963	3.77069	0.000162794	0.00305011
AT1G12180	234.946	1.16946	0.310163	3.77047	0.000162941	0.00305011
AT1G12200	1521.46	3.02051	0.801196	3.77001	0.000163244	0.00305284
AT1G12210	4422.39	-0.64871	0.172086	-3.76968	0.00016346	0.00305392
AT1G12220	9235.6	-0.948023	0.251549	-3.76875	0.000164069	0.0030607
AT1G12230	248.193	-1.02173	0.271121	-3.76852	0.000164216	0.0030607
AT1G12240	625.295	0.775042	0.205669	3.7684	0.000164296	0.0030607
AT1G12244	13244.7	-0.748981	0.198877	-3.76605	0.000165852	0.00308672
AT1G12250	3006.34	0.846493	0.224857	3.76459	0.000166825	0.00310185
AT1G12260	4910.8	-0.583814	0.155107	-3.76395	0.000167253	0.00310683
AT1G12270	56.7582	2.48654	0.66072	3.76338	0.000167633	0.00311091
AT1G12280	111.031	1.28019	0.340458	3.7602	0.000169779	0.00314773
AT1G12290	220.344	1.06573	0.283465	3.75966	0.000170141	0.00314968
AT1G12300	2468.74	-0.577418	0.153586	-3.75957	0.000170209	0.00314968
AT1G12310	37.2744	2.27842	0.606349	3.75761	0.000171547	0.00317141
AT1G12320	9506.68	1.20874	0.321813	3.75603	0.000172629	0.00318838
AT1G12330	19234.8	-0.710543	0.189207	-3.75538	0.000173082	0.0031937
AT1G12340	1279.57	-0.745791	0.198715	-3.75308	0.000174678	0.00322009
AT1G12350	72.8149	2.33692	0.622731	3.75269	0.000174945	0.00322194
AT1G12360	3031.83	-1.08258	0.288715	-3.74966	0.000177077	0.00325503
AT1G12370	51.963	2.84841	0.75963	3.74973	0.000177026	0.00325503
AT1G12380	75.9642	2.43943	0.650668	3.74911	0.000177463	0.00325904
AT1G12390	369.559	1.07191	0.285948	3.74862	0.000177808	0.00326229
AT1G12400	35.9898	1.85424	0.494729	3.74799	0.000178257	0.00326743
AT1G12410	1962.59	2.73888	0.730912	3.74721	0.000178811	0.00327201
AT1G12420	428.996	-0.88172	0.235303	-3.74716	0.000178845	0.00327201
AT1G12430	262.489	0.981536	0.262016	3.74609	0.00017961	0.00328292
AT1G12440	322.6	0.926514	0.247349	3.74578	0.000179837	0.00328397
AT1G12450	1367.16	-0.758481	0.202555	-3.74457	0.000180705	0.00329374
AT1G12460	264.541	-1.796	0.47963	-3.74456	0.000180711	0.00329374
AT1G12470	719.099	-1.45751	0.38941	-3.74285	0.000181941	0.00331304
AT1G12480	1335.32	1.246	0.333142	3.74014	0.000183919	0.0033459
AT1G12500	695.679	0.789462	0.211155	3.73878	0.000184919	0.00335782
AT1G12520	10263.9	-1.0424	0.278819	-3.73862	0.000185033	0.00335782
AT1G12530	3728.76	1.07018	0.286274	3.7383	0.000185266	0.00335782
AT1G12550	536.336	1.44189	0.385692	3.73844	0.000185164	0.00335782
AT1G12570	233.781	1.09998	0.294304	3.73757	0.000185811	0.00336141
AT1G12580	196.932	1.39796	0.374027	3.73758	0.000185804	0.00336141
AT1G12600	822.805	-1.21774	0.325895	-3.73662	0.000186511	0.00336812
AT1G12610	1432.54	-0.945368	0.253003	-3.73659	0.000186529	0.00336812
AT1G12620	3637.23	1.0794	0.289	3.73495	0.000187753	0.00338707
AT1G12630	146.85	2.35036	0.629755	3.73218	0.000189827	0.00341812
AT1G12640	71.7667	-2.27568	0.609708	-3.73241	0.000189657	0.00341812
AT1G12650	11976.1	1.25777	0.33727	3.72926	0.000192042	0.00345481
AT1G12672	31.5448	2.88027	0.772557	3.72823	0.00019283	0.00346576
AT1G12680	1621.49	0.775626	0.208077	3.72759	0.000193318	0.0034704
AT1G12700	2997.17	-0.985252	0.264325	-3.72743	0.000193446	0.0034704
AT1G12710	587.858	1.24842	0.334981	3.72684	0.000193893	0.00347519
AT1G12730	949.397	-0.778304	0.208895	-3.72582	0.000194678	0.00348362
AT1G12750	6944.89	-0.702171	0.188467	-3.7257	0.000194776	0.00348362
AT1G12760	1412.34	1.00327	0.269296	3.72553	0.000194901	0.00348362
AT1G12770	115.633	1.25442	0.336889	3.72355	0.000196443	0.00350793
AT1G12775	4835.87	0.761745	0.204611	3.72289	0.000196957	0.00351388
AT1G12780	1048.51	-1.15751	0.31097	-3.72227	0.000197439	0.00351925
AT1G12790	4534.97	-0.688654	0.185044	-3.72156	0.000197996	0.00352269
AT1G12800	245.28	1.45386	0.390648	3.72167	0.000197913	0.00352269
AT1G12805	750.782	-0.818701	0.22006	-3.72036	0.000198937	0.0035362
AT1G12810	372.303	1.75121	0.4709	3.71886	0.000200123	0.00355402
AT1G12820	825.67	0.874998	0.235321	3.71832	0.000200555	0.00355843
AT1G12830	941.291	-1.01661	0.273507	-3.71692	0.000201665	0.00357485
AT1G12840	3041.42	-0.782864	0.21079	-3.71396	0.000204045	0.00360809
AT1G12845	3990.67	-0.774383	0.208506	-3.71396	0.000204037	0.00360809
AT1G12850	393.728	1.03896	0.279749	3.71389	0.000204098	0.00360809
AT1G12860	123.869	-1.73364	0.466958	-3.71263	0.000205115	0.00362277
AT1G12880	7960.88	-0.603903	0.162788	-3.70974	0.00020747	0.00366103
AT1G12890	118.356	1.09712	0.295917	3.70753	0.000209291	0.00368981
AT1G12900	873.649	-0.934852	0.252352	-3.70455	0.000211762	0.00372998
AT1G12910	283.15	-1.56007	0.42119	-3.70397	0.000212253	0.00373522
AT1G12920	1802.85	1.32665	0.358206	3.70361	0.000212552	0.00373612
AT1G12930	675.931	-0.9283	0.250658	-3.70345	0.000212689	0.00373612
AT1G12940	19.6215	3.424	0.924938	3.70187	0.000214016	0.00375603
AT1G12950	1285.35	-1.10104	0.297471	-3.70136	0.00021445	0.00375833
AT1G12970	10809	-0.750523	0.202775	-3.70126	0.000214535	0.00375833
AT1G12990	192.819	-1.43564	0.38799	-3.7002	0.000215432	0.00376979
AT1G13000	123.33	1.31207	0.354612	3.70003	0.000215578	0.00376979
AT1G13020	33.577	2.99522	0.809865	3.69841	0.00021695	0.00379037
AT1G13030	1808.81	-0.671692	0.181642	-3.69789	0.000217397	0.00379477
AT1G13040	21539.4	-0.846744	0.229058	-3.69664	0.000218475	0.00381015
AT1G13050	3169.8	-0.553135	0.149807	-3.69231	0.000222229	0.00387214
AT1G13060	126.899	1.22731	0.332567	3.69042	0.000223886	0.00389561
AT1G13080	164.571	1.51418	0.410328	3.69017	0.000224104	0.00389561
AT1G13090	185.35	0.932143	0.252608	3.69009	0.000224179	0.00389561
AT1G13100	154.626	1.68292	0.456228	3.68876	0.000225345	0.00391237
AT1G13110	2083.18	-0.578885	0.156988	-3.68744	0.000226519	0.00392923
AT1G13120	4879.53	-0.936759	0.254057	-3.6872	0.000226732	0.00392942
AT1G13130	7803.62	0.943884	0.256016	3.68681	0.000227081	0.00393195
AT1G13140	227.158	1.1726	0.318147	3.68573	0.00022805	0.00394521
AT1G13150	1635.18	-0.594075	0.161322	-3.68254	0.000230924	0.00399136
AT1G13160	703.053	-0.888867	0.241436	-3.68158	0.000231793	0.00399925
AT1G13170	1656.06	0.794331	0.215753	3.68166	0.000231716	0.00399925
AT1G13180	805.3	0.883269	0.24006	3.67936	0.00023382	0.00402348
AT1G13190	100.702	1.99623	0.542526	3.67951	0.000233683	0.00402348
AT1G13195	2308.89	1.03727	0.281903	3.67953	0.000233663	0.00402348
AT1G13210	4574.13	-0.828769	0.225365	-3.67745	0.000235573	0.00405007
AT1G13220	5816.17	-0.772152	0.210003	-3.67686	0.000236125	0.00405595
AT1G13230	233.676	1.32885	0.361579	3.67514	0.000237717	0.00407969
AT1G13245	630.193	0.83061	0.226124	3.67325	0.000239482	0.00409767
AT1G13250	6935.64	-1.12863	0.307268	-3.67312	0.00023961	0.00409767
AT1G13260	258.181	1.1756	0.320024	3.67347	0.000239283	0.00409767
AT1G13270	946.514	1.46049	0.397611	3.67315	0.000239578	0.00409767
AT1G13280	597.312	-0.954296	0.259831	-3.67275	0.000239953	0.00409991
AT1G13310	6885.97	-0.68956	0.187807	-3.67163	0.000241004	0.00411425
AT1G13320	2644.03	-0.623657	0.169898	-3.67077	0.000241821	0.00412094
AT1G13330	4847.72	-0.625946	0.170513	-3.67096	0.000241642	0.00412094
AT1G13340	3810.69	1.34535	0.36663	3.6695	0.00024303	0.00413791
AT1G13350	1381.49	-0.676242	0.18433	-3.66865	0.000243836	0.00414609
AT1G13360	8148.14	-1.07001	0.291673	-3.66854	0.000243938	0.00414609
AT1G13370	1627.43	0.867549	0.236501	3.66827	0.000244195	0.00414683
AT1G13380	3749.85	-0.750196	0.20457	-3.66719	0.00024523	0.00415239
AT1G13390	1666.34	0.681943	0.18597	3.66695	0.000245458	0.00415239
AT1G13410	1157.25	0.92538	0.252334	3.66728	0.000245144	0.00415239
AT1G13420	81.301	1.44752	0.394713	3.66726	0.000245164	0.00415239
AT1G13430	2498.49	0.611782	0.166843	3.66681	0.000245593	0.00415239
AT1G13440	175.473	1.04407	0.284811	3.66583	0.000246534	0.00416103
AT1G13450	277.691	1.50609	0.410838	3.66588	0.000246487	0.00416103
AT1G13460	1565.29	1.16268	0.317226	3.66515	0.000247198	0.00416862
AT1G13520	2964.39	-0.727263	0.198466	-3.66443	0.000247893	0.0041767
AT1G13550	498.78	-0.758464	0.207124	-3.66188	0.000250366	0.00420741
AT1G13560	1029.08	0.814549	0.222436	3.66195	0.000250305	0.00420741
AT1G13570	2815.45	-0.721295	0.196959	-3.66215	0.000250106	0.00420741
AT1G13580	882.966	-0.663374	0.181206	-3.66088	0.000251352	0.00422032
AT1G13600	3722.62	-0.565998	0.154624	-3.66049	0.000251733	0.00422307
AT1G13605	4348.62	-0.845886	0.231138	-3.65966	0.000252545	0.00423303
AT1G13630	770.203	0.839775	0.229537	3.65855	0.000253643	0.00424409
AT1G13635	259.877	-1.47312	0.402634	-3.65871	0.000253485	0.00424409
AT1G13640	1435.49	0.890194	0.243372	3.65775	0.000254435	0.00425367
AT1G13650	1840.83	-0.721219	0.197206	-3.65719	0.000254999	0.00425662
AT1G13670	621.045	0.810235	0.221549	3.65713	0.000255051	0.00425662
AT1G13680	648.132	1.24332	0.340072	3.65604	0.000256145	0.00427121
AT1G13690	357.522	0.905039	0.247575	3.65561	0.000256571	0.00427464
AT1G13700	627.825	-0.860619	0.235449	-3.65522	0.000256958	0.00427742
AT1G13710	50.4414	2.42948	0.664833	3.65426	0.000257923	0.00428853
AT1G13730	74.1459	1.66945	0.456867	3.65412	0.000258068	0.00428853
AT1G13740	877.089	0.660896	0.180938	3.65262	0.000259576	0.00430989
AT1G13750	239.341	1.02816	0.281544	3.65188	0.00026033	0.00431503
AT1G13755	563.121	-0.804499	0.220289	-3.65201	0.000260193	0.00431503
AT1G13770	252.459	1.06723	0.292266	3.65156	0.00026065	0.00431664
AT1G13780	2432.74	1.65869	0.454514	3.64936	0.000262896	0.00435012
AT1G13790	3159.49	-0.761089	0.208619	-3.64823	0.000264057	0.00436561
AT1G13800	690.908	0.764546	0.209593	3.64776	0.000264538	0.00436983
AT1G13810	4962.96	-0.783028	0.214676	-3.64749	0.000264813	0.00437065
AT1G13820	1898.52	-0.676154	0.185394	-3.64712	0.000265196	0.00437325
AT1G13830	657.104	-0.686771	0.188333	-3.64657	0.000265766	0.00437701
AT1G13860	41320	-0.880501	0.241467	-3.64646	0.000265875	0.00437701
AT1G13870	1933.16	-0.698126	0.19151	-3.64537	0.000267006	0.0043919
AT1G13880	6095.77	-0.660471	0.181228	-3.64441	0.000268003	0.00440084
AT1G13900	2919.18	-0.861844	0.236481	-3.64444	0.00026797	0.00440084
AT1G13910	10276.5	-0.680089	0.186647	-3.64371	0.000268733	0.00440598
AT1G13920	301.152	0.967941	0.265649	3.64368	0.000268771	0.00440598
AT1G13930	734.315	1.14479	0.314225	3.64322	0.000269251	0.00441012
AT1G13940	711.193	-0.80567	0.221227	-3.64182	0.000270715	0.00442663
AT1G13950	2283.41	1.60786	0.441497	3.64183	0.000270705	0.00442663
AT1G13960	335.684	-0.870679	0.239265	-3.63898	0.000273719	0.00447198
AT1G13970	2516.81	-0.850565	0.233795	-3.63808	0.000274683	0.00448395
AT1G13980	236.675	1.18662	0.326248	3.63717	0.000275648	0.00449591
AT1G13990	1338.6	1.4372	0.395284	3.63587	0.000277044	0.0045118
AT1G14000	865.268	0.963711	0.265059	3.63583	0.000277087	0.0045118
AT1G14010	503.26	0.835766	0.229905	3.63526	0.000277702	0.00451801
AT1G14020	2267.69	-0.777437	0.21388	-3.63491	0.000278074	0.00452027
AT1G14030	137.207	1.12974	0.310882	3.63399	0.000279074	0.00453273
AT1G14040	1413.38	0.923474	0.254187	3.63304	0.0002801	0.00454559
AT1G14060	140.125	1.38602	0.381543	3.63267	0.000280503	0.00454575
AT1G14070	1076.22	-0.853043	0.23483	-3.6326	0.000280578	0.00454575
AT1G14080	94.131	1.49156	0.411035	3.6288	0.000284744	0.00460939
AT1G14120	7556.87	-0.675302	0.186124	-3.62824	0.000285365	0.00461558
AT1G14130	2224.29	0.8563	0.236063	3.62742	0.000286265	0.00461705
AT1G14140	365548	-0.740725	0.204212	-3.62724	0.000286466	0.00461705
AT1G14150	840.533	1.18929	0.327845	3.62761	0.000286058	0.00461705
AT1G14170	17828	-0.731926	0.201753	-3.62782	0.000285819	0.00461705
AT1G14180	415.949	0.950887	0.262163	3.62708	0.000286646	0.00461705
AT1G14185	178.536	0.969638	0.267393	3.62627	0.000287546	0.0046254
AT1G14190	890.116	0.819677	0.226044	3.62618	0.000287642	0.0046254
AT1G14200	5495.62	-0.710086	0.195929	-3.62419	0.000289867	0.00465733
AT1G14205	108.443	1.94324	0.536403	3.62273	0.000291509	0.00467982
AT1G14210	1387.02	0.936217	0.258516	3.62151	0.000292888	0.00468644
AT1G14220	4299.34	0.980641	0.270754	3.62189	0.000292463	0.00468644
AT1G14230	354.792	0.920754	0.254243	3.62156	0.000292836	0.00468644
AT1G14240	679.082	0.926862	0.255891	3.62209	0.00029223	0.00468644
AT1G14250	2557.61	-0.618742	0.170922	-3.62004	0.000294562	0.00470935
AT1G14260	873.975	-1.02218	0.282436	-3.61916	0.000295559	0.0047214
AT1G14270	249.014	-0.823628	0.227734	-3.61662	0.000298477	0.00476409
AT1G14280	7715.57	-0.596591	0.164988	-3.61596	0.000299237	0.00476445
AT1G14290	849.19	0.672347	0.185934	3.61605	0.00029913	0.00476445
AT1G14300	273.071	1.79789	0.497192	3.61609	0.000299081	0.00476445
AT1G14310	1038.21	0.924841	0.255912	3.6139	0.000301621	0.00479848
AT1G14320	447.716	1.0862	0.300593	3.61353	0.000302051	0.00480138
AT1G14330	2621.1	-0.770666	0.213293	-3.61317	0.000302473	0.00480414
AT1G14340	45.9725	1.84131	0.509777	3.61199	0.000303862	0.00482225
AT1G14345	411.089	0.786178	0.217743	3.61058	0.000305509	0.00484225
AT1G14350	6433.44	1.0294	0.285113	3.61049	0.000305622	0.00484225
AT1G14360	628.961	0.848029	0.234952	3.60938	0.000306931	0.00485903
AT1G14370	396.871	1.17352	0.325165	3.60898	0.000307399	0.00486247
AT1G14380	13588.3	0.98961	0.274231	3.60867	0.000307769	0.00486436
AT1G14390	638.428	0.811114	0.224809	3.60802	0.000308542	0.00487261
AT1G14400	1037.89	-1.20154	0.333099	-3.60717	0.000309552	0.00488458
AT1G14410	647.771	-1.28354	0.355929	-3.60618	0.000310741	0.00489264
AT1G14420	438.541	-0.834809	0.231474	-3.60649	0.000310365	0.00489264
AT1G14430	399.66	1.403	0.389061	3.60611	0.00031082	0.00489264
AT1G14440	11711.4	0.98543	0.273371	3.60474	0.000312471	0.00491464
AT1G14450	254.998	1.04783	0.290712	3.60438	0.000312903	0.00491497
AT1G14455	2061.59	0.925864	0.256878	3.6043	0.000312999	0.00491497
AT1G14460	36.6556	1.98992	0.552158	3.6039	0.00031348	0.00491854
AT1G14470	1752.49	-0.809568	0.224701	-3.60288	0.000314716	0.00493394
AT1G14480	4595.39	-0.695059	0.19297	-3.6019	0.000315899	0.00494848
AT1G14490	3656.88	-0.694351	0.192842	-3.60062	0.000317458	0.00496889
AT1G14510	1341.14	-1.03328	0.287016	-3.60007	0.00031813	0.0049754
AT1G14520	478.056	1.05287	0.292503	3.5995	0.000318827	0.00498228
AT1G14530	1450.99	-0.656212	0.18234	-3.59883	0.000319652	0.00499115
AT1G14540	79.7151	1.33006	0.36972	3.59748	0.000321316	0.0050131
AT1G14550	98905.6	0.785138	0.218394	3.59505	0.000324329	0.00505604
AT1G14560	2799.84	-1.02101	0.284122	-3.59357	0.000326181	0.00508082
AT1G14570	15426.7	-0.670153	0.186504	-3.59324	0.000326598	0.00508184
AT1G14580	3448.82	-0.873027	0.242973	-3.5931	0.00032677	0.00508184
AT1G14590	518.524	1.08846	0.302958	3.59279	0.000327154	0.00508374
AT1G14600	1754.99	-0.772596	0.215064	-3.5924	0.000327643	0.00508725
AT1G14610	565.393	0.883908	0.246147	3.59098	0.000329432	0.00511094
AT1G14620	1244.87	-0.856262	0.238493	-3.5903	0.0003303	0.00511213
AT1G14630	14.3034	3.38522	0.942787	3.59065	0.000329857	0.00511213
AT1G14640	65.1897	2.81919	0.785182	3.5905	0.000330049	0.00511213
AT1G14650	2229.78	-0.669846	0.186621	-3.58935	0.000331505	0.0051267
AT1G14660	13132.5	-0.670558	0.186949	-3.58686	0.00033469	0.00517182
AT1G14670	8990.66	-0.678344	0.189158	-3.58613	0.000335624	0.00518214
AT1G14680	360.178	0.824697	0.229985	3.58587	0.000335959	0.00518317
AT1G14685	305.375	1.06635	0.297411	3.58544	0.000336505	0.00518562
AT1G14687	742.411	0.856058	0.238767	3.58533	0.000336652	0.00518562
AT1G14690	1439.22	-0.714889	0.199418	-3.58488	0.000337235	0.00518637
AT1G14700	477.436	0.846835	0.236217	3.58498	0.000337098	0.00518637
AT1G14710	2397.07	-0.529134	0.147714	-3.58216	0.000340769	0.00523656
AT1G14720	631.171	1.1155	0.311448	3.58166	0.000341412	0.00524229
AT1G14730	120.377	1.27567	0.356239	3.58093	0.00034238	0.00525298
AT1G14740	732.108	-0.644813	0.18017	-3.57891	0.000345031	0.00528947
AT1G14750	99.8907	2.0019	0.559525	3.57785	0.000346433	0.00530677
AT1G14755	3184.14	0.821348	0.229603	3.57725	0.000347225	0.0053147
AT1G14770	403.971	1.19282	0.333488	3.57681	0.000347811	0.00531948
AT1G14780	287.277	0.804025	0.224803	3.57657	0.000348129	0.00532014
AT1G14790	1258.76	-0.627682	0.175654	-3.57339	0.00035239	0.00538103
AT1G14810	448.719	1.43151	0.400682	3.5727	0.000353321	0.005391
AT1G14820	2849.6	0.914715	0.256071	3.57212	0.000354105	0.00539447
AT1G14830	53.1269	2.32766	0.651583	3.57231	0.000353844	0.00539447
AT1G14840	7639.68	-0.748005	0.209447	-3.57133	0.000355177	0.00540655
AT1G14850	8105.28	-0.616952	0.172783	-3.57068	0.000356061	0.00541576
AT1G14860	1963.86	-0.655669	0.183646	-3.57028	0.000356595	0.00541963
AT1G14870	335.081	0.875433	0.245289	3.56899	0.000358366	0.00544229
AT1G14890	224.439	1.4936	0.41861	3.56799	0.000359726	0.00545866
AT1G14900	1224.37	0.747661	0.209571	3.56758	0.000360299	0.00546307
AT1G14910	5270.1	-0.981118	0.275039	-3.5672	0.000360813	0.00546659
AT1G14920	74.5354	1.49974	0.420501	3.56655	0.000361705	0.00547157
AT1G14930	3526.55	-0.738577	0.207082	-3.56659	0.00036165	0.00547157
AT1G14970	74.6432	1.60733	0.450815	3.56538	0.000363326	0.00549181
AT1G14980	675.009	-0.685942	0.192435	-3.56455	0.000364482	0.00550498
AT1G14990	2133.24	1.13739	0.319243	3.56277	0.000366967	0.00553258
AT1G15000	968.763	1.06953	0.300208	3.56262	0.000367165	0.00553258
AT1G15010	241.852	1.77288	0.497631	3.56264	0.000367148	0.00553258
AT1G15020	1946.88	-0.83254	0.233793	-3.56101	0.000369431	0.0055624
AT1G15030	775.502	0.731666	0.20552	3.56008	0.000370744	0.00557784
AT1G15040	41.7936	1.88577	0.529889	3.5588	0.000372547	0.00560063
AT1G15050	2150.42	-0.674584	0.189589	-3.55814	0.000373493	0.00560769
AT1G15060	39.1697	2.42677	0.682048	3.55807	0.000373595	0.00560769
AT1G15080	11566	-0.702772	0.197564	-3.55719	0.000374844	0.00562207
AT1G15100	770.309	0.866054	0.243522	3.55637	0.000376009	0.00563519
AT1G15110	3713.8	-0.670271	0.188487	-3.55606	0.000376461	0.00563761
AT1G15120	625.639	1.03577	0.291308	3.55559	0.000377139	0.0056434
AT1G15125	5590.68	-0.68632	0.193079	-3.55461	0.000378543	0.00565635
AT1G15130	269.932	1.50756	0.424119	3.55458	0.000378587	0.00565635
AT1G15140	829.105	0.726437	0.20443	3.55348	0.000380172	0.00567566
AT1G15150	5838.38	1.07065	0.30133	3.55309	0.00038074	0.00567976
AT1G15160	4157.14	-0.652237	0.18361	-3.55229	0.000381895	0.00569261
AT1G15165	965.63	0.969069	0.272878	3.55129	0.000383346	0.00570985
AT1G15170	99.2203	1.37295	0.386718	3.55027	0.00038484	0.0057277
AT1G15180	3745.96	-0.667535	0.188037	-3.55002	0.0003852	0.00572867
AT1G15190	2384.12	-0.909625	0.256316	-3.54884	0.00038693	0.00574999
AT1G15200	74.0909	2.3034	0.649168	3.54824	0.000387821	0.00575882
AT1G15210	414.338	0.919412	0.259231	3.54669	0.000390108	0.00578835
AT1G15215	1964.75	0.657001	0.185255	3.54647	0.000390432	0.00578872
AT1G15220	412.543	0.75275	0.21228	3.54603	0.000391079	0.00579388
AT1G15230	7602.31	-0.707414	0.199616	-3.54387	0.000394305	0.0058333
AT1G15240	917.99	-0.68493	0.193273	-3.54384	0.000394341	0.0058333
AT1G15250	9830.54	-0.963864	0.272018	-3.54338	0.000395037	0.00583914
AT1G15260	156.509	-1.08006	0.304857	-3.54283	0.000395862	0.00584688
AT1G15270	19078.1	-0.629851	0.177827	-3.54193	0.000397206	0.00585994
AT1G15280	31.0264	2.21325	0.624889	3.54184	0.000397351	0.00585994
AT1G15290	3231.69	-0.594208	0.167814	-3.54088	0.000398801	0.00587685
AT1G15310	917.829	0.686487	0.193895	3.54051	0.000399348	0.00588046
AT1G15330	18.066	-2.61436	0.738479	-3.5402	0.000399824	0.005883
AT1G15340	877.298	-0.632205	0.178604	-3.5397	0.000400587	0.00588976
AT1G15350	3857.61	-0.580522	0.164022	-3.5393	0.000401195	0.00589423
AT1G15370	6577.23	-0.527146	0.148998	-3.53794	0.000403261	0.00591128
AT1G15380	1791.55	-0.920931	0.260306	-3.53788	0.000403348	0.00591128
AT1G15385	165.679	-0.912566	0.257952	-3.53773	0.000403575	0.00591128
AT1G15390	1216.63	-0.71008	0.20071	-3.53785	0.000403405	0.00591128
AT1G15400	225.599	-1.24152	0.35128	-3.53427	0.000408898	0.0059818
AT1G15410	1467.85	-0.588897	0.166628	-3.5342	0.000409007	0.0059818
AT1G15415	349.903	0.981449	0.277809	3.53282	0.000411149	0.0060086
AT1G15420	9625.26	-0.7781	0.2203	-3.532	0.000412426	0.00601367
AT1G15430	1114.79	0.766985	0.217153	3.53201	0.000412412	0.00601367
AT1G15440	210.206	1.25727	0.355928	3.53238	0.000411834	0.00601367
AT1G15460	133.34	1.38903	0.393379	3.53103	0.000413951	0.00603137
AT1G15470	578.663	-0.73622	0.208565	-3.52993	0.000415663	0.00604488
AT1G15480	1082.04	-1.12412	0.318463	-3.52984	0.000415813	0.00604488
AT1G15490	1609.53	1.44901	0.410491	3.52995	0.000415638	0.00604488
AT1G15500	2529.78	-0.621733	0.176148	-3.52961	0.000416175	0.00604561
AT1G15510	886.415	-0.995569	0.282254	-3.52721	0.00041996	0.00609603
AT1G15520	1895.11	-0.90429	0.256435	-3.52639	0.00042126	0.00611032
AT1G15530	2624.91	1.01401	0.287592	3.52585	0.000422118	0.00611819
AT1G15550	1328.06	-0.761686	0.2161	-3.52469	0.000423971	0.00614046
AT1G15570	1411.23	-0.697366	0.197902	-3.52379	0.000425421	0.00615686
AT1G15580	254.735	1.63993	0.465458	3.52326	0.000426276	0.00616463
AT1G15630	11735.3	-0.978425	0.277723	-3.52303	0.000426645	0.00616537
AT1G15660	4566.51	-0.768069	0.218046	-3.52251	0.000427477	0.00617279
AT1G15670	117.572	1.7723	0.503235	3.52182	0.000428588	0.00618424
AT1G15690	4631.61	-0.664557	0.18872	-3.5214	0.000429274	0.00618952
AT1G15700	9213.88	-0.764298	0.217081	-3.52079	0.000430259	0.00619911
AT1G15710	111.246	1.08793	0.309135	3.51927	0.000432734	0.00622599
AT1G15720	2317.35	-1.02172	0.290324	-3.51925	0.000432766	0.00622599
AT1G15730	379.342	1.25526	0.35674	3.51868	0.000433694	0.00623471
AT1G15740	5310.18	-0.699424	0.198792	-3.51838	0.000434198	0.00623734
AT1G15750	1673.78	-0.662019	0.188198	-3.51767	0.000435348	0.00624923
AT1G15760	1616.42	-0.588539	0.167337	-3.51708	0.000436321	0.00625394
AT1G15772	704.527	0.856316	0.243469	3.51715	0.000436211	0.00625394
AT1G15780	973.772	-0.657616	0.186994	-3.51678	0.000436809	0.0062563
AT1G15790	534.697	1.05242	0.299298	3.51629	0.000437628	0.00626325
AT1G15800	691.977	-0.599768	0.170578	-3.5161	0.00043794	0.00626325
AT1G15810	2247.09	1.10785	0.315161	3.5152	0.000439426	0.00627988
AT1G15820	256.062	0.828622	0.235811	3.51392	0.000441551	0.00630559
AT1G15825	9931.02	-0.587926	0.167466	-3.51072	0.000446898	0.00637725
AT1G15830	9489.18	-0.647964	0.184588	-3.51033	0.000447544	0.00638178
AT1G15840	42.5483	3.06249	0.872585	3.50967	0.000448663	0.00639303
AT1G15860	3674.65	-0.722931	0.205999	-3.50938	0.000449145	0.00639521
AT1G15870	225.317	1.47346	0.419889	3.50916	0.000449517	0.00639533
AT1G15880	542.691	-0.821541	0.234138	-3.50879	0.000450143	0.00639533
AT1G15890	290.412	1.1311	0.322351	3.50891	0.000449947	0.00639533
AT1G15900	2684.27	-0.622907	0.177767	-3.50406	0.000458222	0.00650535
AT1G15910	1682.73	-0.659427	0.188208	-3.50372	0.000458814	0.00650898
AT1G15920	2133.6	0.697311	0.199114	3.50207	0.000461663	0.00654461
AT1G15930	1169.59	-0.643247	0.183714	-3.50135	0.000462906	0.00655476
AT1G15940	6501.1	-0.676686	0.193269	-3.50127	0.000463055	0.00655476
AT1G15950	1520.45	1.14139	0.326121	3.4999	0.000465426	0.00658351
AT1G15960	1854.72	-0.81707	0.233514	-3.49902	0.000466976	0.00660063
AT1G15970	441.168	1.20468	0.34437	3.49822	0.000468379	0.00661564
AT1G15980	530.915	0.730993	0.208995	3.49767	0.000469348	0.0066245
AT1G16000	2412.65	-0.577448	0.16513	-3.49694	0.000470636	0.00663785
AT1G16010	69.1005	1.31004	0.374692	3.4963	0.000471751	0.00664391
AT1G16020	1721	-0.733567	0.209807	-3.49639	0.000471597	0.00664391
AT1G16022	128.94	-1.46717	0.419659	-3.49611	0.000472097	0.00664395
AT1G16030	88.3886	1.23126	0.352203	3.49589	0.000472481	0.00664455
AT1G16040	18.9838	-3.14981	0.901587	-3.49362	0.000476511	0.00669152
AT1G16060	6858.64	-0.673697	0.192827	-3.49378	0.000476224	0.00669152
AT1G16070	754.332	0.820767	0.234965	3.49314	0.000477368	0.00669385
AT1G16080	382.481	0.95796	0.274227	3.49331	0.000477067	0.00669385
AT1G16090	36.7679	2.49579	0.714732	3.49193	0.000479546	0.00671468
AT1G16110	195.385	0.896426	0.256706	3.49204	0.000479349	0.00671468
AT1G16120	298.698	1.01936	0.291989	3.49108	0.000481069	0.00673115
AT1G16130	492.648	0.842803	0.241439	3.49075	0.000481659	0.00673454
AT1G16150	274.792	0.881632	0.252673	3.48922	0.000484425	0.00676347
AT1G16160	2851.63	-0.618401	0.177228	-3.48929	0.000484314	0.00676347
AT1G16170	94.8801	1.43587	0.411562	3.48884	0.000485126	0.00676838
AT1G16180	2523.81	1.19266	0.341884	3.48851	0.000485721	0.00677181
AT1G16190	7142.92	-0.952654	0.273122	-3.48802	0.000486617	0.00677943
AT1G16210	2385.7	1.14016	0.327026	3.48646	0.000489457	0.00681411
AT1G16220	4380.12	-0.663419	0.190295	-3.48626	0.000489822	0.00681429
AT1G16240	1543.59	-0.755317	0.216769	-3.48444	0.000493175	0.00685601
AT1G16250	125.905	1.24661	0.357792	3.48418	0.000493647	0.00685766
AT1G16260	132649	-0.772234	0.221676	-3.48362	0.000494674	0.006867
AT1G16270	34.4649	3.45173	0.990961	3.48322	0.000495421	0.00686754
AT1G16280	591.765	0.713321	0.204781	3.48333	0.000495214	0.00686754
AT1G16290	64.3104	1.73771	0.498915	3.48298	0.000495859	0.00686872
AT1G16300	10942.2	0.512078	0.147045	3.48246	0.000496836	0.00687243
AT1G16310	3505.86	-0.81116	0.232923	-3.48252	0.000496719	0.00687243
AT1G16320	1540.58	-1.6022	0.460338	-3.48048	0.000500514	0.00691836
AT1G16330	132.333	2.24171	0.644186	3.47991	0.00050158	0.00692816
AT1G16340	79.37	1.90932	0.548782	3.4792	0.000502922	0.00694176
AT1G16350	3304.68	-0.731046	0.210264	-3.47679	0.000507452	0.00698461
AT1G16360	2856.82	-0.575375	0.165486	-3.47688	0.00050729	0.00698461
AT1G16370	87.6249	1.41906	0.408125	3.47702	0.000507021	0.00698461
AT1G16380	3621.98	-0.585268	0.168336	-3.47678	0.000507467	0.00698461
AT1G16390	961.744	-0.59212	0.170343	-3.47604	0.000508874	0.006999
AT1G16400	1602.67	-0.712441	0.204999	-3.47534	0.000510204	0.00701232
AT1G16410	99	2.49004	0.716881	3.47344	0.000513841	0.00705731
AT1G16430	4992.32	1.05102	0.302687	3.47231	0.000516004	0.007082
AT1G16440	70.6227	2.10866	0.607367	3.4718	0.000516988	0.00709049
AT1G16445	6200.17	0.619185	0.178415	3.47047	0.000519543	0.0071205
AT1G16460	16.8657	4.09916	1.18126	3.47016	0.000520154	0.00712379
AT1G16470	13115.7	-0.654764	0.188695	-3.46997	0.000520519	0.00712379
AT1G16480	2114.22	-0.537666	0.154967	-3.46955	0.000521332	0.00712989
AT1G16490	8852.87	-0.68906	0.198624	-3.46918	0.000522057	0.00713478
AT1G16500	174.188	1.11084	0.320349	3.46758	0.00052516	0.00717213
AT1G16510	20.1861	2.41459	0.696514	3.46668	0.000526924	0.00718966
AT1G16520	43563.3	-0.711564	0.205266	-3.46655	0.000527185	0.00718966
AT1G16540	1653.29	-0.803205	0.23174	-3.46597	0.000528324	0.00719002
AT1G16560	511.835	0.685196	0.19769	3.46601	0.000528238	0.00719002
AT1G16570	947.244	-0.749401	0.216201	-3.46621	0.000527843	0.00719002
AT1G16590	383.106	0.809589	0.233629	3.46528	0.000529677	0.00720037
AT1G16610	7160.09	-0.589592	0.17015	-3.46513	0.000529967	0.00720037
AT1G16630	1122.65	-0.586634	0.169302	-3.46502	0.000530198	0.00720037
AT1G16640	47.1902	2.0018	0.578055	3.463	0.000534197	0.00724961
AT1G16650	195.209	-1.1367	0.328275	-3.46265	0.000534884	0.00725385
AT1G16670	2056.43	0.935947	0.270367	3.46176	0.000536647	0.00727268
AT1G16680	5098.21	0.825834	0.238794	3.45835	0.000543488	0.00735711
AT1G16690	112.007	1.25337	0.362425	3.45828	0.000543636	0.00735711
AT1G16700	11203.8	-0.631846	0.182741	-3.4576	0.000545013	0.00736624
AT1G16705	81.1375	1.25209	0.36213	3.45757	0.000545071	0.00736624
AT1G16710	620.465	0.84792	0.245358	3.45585	0.000548564	0.00740829
AT1G16720	201.413	-0.994764	0.288075	-3.45314	0.000554097	0.0074778
AT1G16730	257.837	1.16388	0.3371	3.45263	0.000555142	0.00748669
AT1G16740	3569.88	0.680437	0.197102	3.45221	0.00055602	0.00748962
AT1G16750	1988.95	-0.572312	0.165784	-3.45215	0.000556131	0.00748962
AT1G16770	976.373	-1.33608	0.387072	-3.45176	0.000556936	0.00749526
AT1G16780	375.11	-0.812943	0.235579	-3.45083	0.000558863	0.00751597
AT1G16790	2917.92	-0.537467	0.155775	-3.45029	0.000559995	0.00752474
AT1G16800	172.693	0.892245	0.258611	3.45014	0.000560291	0.00752474
AT1G16810	144.78	0.960235	0.278354	3.4497	0.000561218	0.00752968
AT1G16820	73.0739	-1.29428	0.375219	-3.44938	0.000561865	0.00752968
AT1G16825	1102.76	-0.722366	0.209422	-3.44933	0.000561986	0.00752968
AT1G16830	2214.72	-0.776796	0.225209	-3.44922	0.000562212	0.00752968
AT1G16840	86.5436	1.33761	0.387915	3.4482	0.000564332	0.00755285
AT1G16850	1000.76	-0.847373	0.245822	-3.4471	0.000566643	0.00757197
AT1G16858	495.876	-0.823925	0.239014	-3.44718	0.000566473	0.00757197
AT1G16860	94.5338	-1.65699	0.480711	-3.44696	0.000566931	0.00757197
AT1G16870	1211.29	-1.02232	0.296709	-3.44553	0.000569936	0.00760686
AT1G16880	788.805	0.929131	0.269702	3.44503	0.000570999	0.00761581
AT1G16890	302.263	1.8456	0.535771	3.44476	0.00057157	0.00761818
AT1G16900	218.705	1.12702	0.327189	3.44454	0.000572022	0.00761897
AT1G16905	46.3452	1.67276	0.485915	3.44251	0.000576351	0.00766496
AT1G16910	170.485	1.02526	0.297868	3.44199	0.000577451	0.00766496
AT1G16916	3453.88	-0.74204	0.215568	-3.44225	0.000576895	0.00766496
AT1G16920	231.439	-1.16281	0.337827	-3.44202	0.000577398	0.00766496
AT1G16930	270.592	0.859673	0.249723	3.44251	0.000576335	0.00766496
AT1G16950	1163.46	0.974829	0.283414	3.43959	0.000582601	0.00772803
AT1G16960	2500.85	0.704604	0.204874	3.43921	0.000583409	0.00773346
AT1G16970	437.697	-0.753801	0.219195	-3.43895	0.000583969	0.00773559
AT1G17010	49.6612	1.5236	0.443189	3.43781	0.000586441	0.00776303
AT1G17020	6294.66	-0.779605	0.226787	-3.43761	0.00058687	0.00776342
AT1G17030	308.919	1.05165	0.306018	3.43655	0.000589171	0.00778854
AT1G17040	496.547	-0.838302	0.243955	-3.4363	0.000589718	0.00779046
AT1G17050	9317.25	-1.03023	0.299833	-3.436	0.000590367	0.00779373
AT1G17060	509.539	-1.66031	0.483543	-3.43364	0.00059554	0.00785667
AT1G17070	287.416	1.48329	0.43207	3.43299	0.000596954	0.00786463
AT1G17080	5397.43	-0.798589	0.232616	-3.43309	0.000596751	0.00786463
AT1G17090	519.102	-0.633255	0.184476	-3.43272	0.000597558	0.00786723
AT1G17100	3633.66	-0.87962	0.256288	-3.43215	0.000598813	0.00787842
AT1G17110	72.4101	1.91824	0.558969	3.43174	0.000599723	0.00788504
AT1G17120	1167.33	-0.667399	0.194533	-3.43078	0.000601851	0.00790766
AT1G17130	362.474	1.17914	0.343742	3.43029	0.000602928	0.00791561
AT1G17140	8801.64	-1.24648	0.363414	-3.42992	0.000603763	0.00791561
AT1G17145	2597.44	0.657482	0.191695	3.42984	0.000603947	0.00791561
AT1G17147	15.1036	3.68082	1.0732	3.42977	0.000604089	0.00791561
AT1G17150	552.241	0.780536	0.227596	3.42948	0.000604741	0.0079188
AT1G17160	2040.18	-0.961639	0.280556	-3.42762	0.000608894	0.00795777
AT1G17170	836.786	-0.568821	0.165953	-3.4276	0.000608948	0.00795777
AT1G17180	2021.35	-0.856869	0.249965	-3.42796	0.000608144	0.00795777
AT1G17190	186.205	0.862889	0.251761	3.42741	0.000609373	0.00795796
AT1G17200	308.468	-0.741136	0.216257	-3.42711	0.000610045	0.00796137
AT1G17210	60.1078	1.47605	0.430937	3.42521	0.000614314	0.00801169
AT1G17220	4463.95	-1.10722	0.323398	-3.42371	0.000617725	0.00805077
AT1G17230	3776.95	-0.57968	0.16933	-3.42338	0.000618484	0.00805524
AT1G17250	5164.98	-0.822922	0.240412	-3.42296	0.000619423	0.00806206
AT1G17260	1026.61	-0.570808	0.166811	-3.42189	0.000621866	0.00808301
AT1G17270	4736.67	0.596901	0.174431	3.42199	0.000621652	0.00808301
AT1G17280	615.834	0.950329	0.277811	3.42078	0.000624421	0.00811079
AT1G17290	707.953	0.752924	0.220149	3.42006	0.000626072	0.00812678
AT1G17300	540.916	-0.840843	0.245922	-3.41914	0.000628198	0.00814348
AT1G17310	799.624	0.761842	0.222811	3.41923	0.000627997	0.00814348
AT1G17330	3387.17	0.790746	0.231323	3.41836	0.000629989	0.00816124
AT1G17340	93.0478	2.26003	0.661221	3.41797	0.000630896	0.00816753
AT1G17350	1663.49	-1.01905	0.298358	-3.41552	0.000636598	0.00823586
AT1G17360	3431.15	-0.809964	0.237316	-3.41302	0.000642462	0.00830618
AT1G17370	22.266	2.32459	0.681214	3.41242	0.000643881	0.00831898
AT1G17380	545.605	3.19159	0.935869	3.4103	0.000648912	0.0083784
AT1G17400	4299.14	-0.656427	0.192495	-3.41011	0.000649375	0.0083788
AT1G17410	33.4074	2.28411	0.67	3.40912	0.000651731	0.00840361
AT1G17420	468.816	-0.706787	0.207346	-3.40873	0.000652651	0.00840687
AT1G17430	729.514	1.16927	0.343029	3.40865	0.000652851	0.00840687
AT1G17440	380.187	-0.951333	0.279142	-3.40806	0.000654262	0.00840829
AT1G17450	2387.14	-0.67228	0.197256	-3.40816	0.000654031	0.00840829
AT1G17455	197.001	1.78308	0.52317	3.40822	0.000653872	0.00840829
AT1G17460	2534.76	-0.623371	0.182963	-3.40708	0.000656611	0.00843288
AT1G17470	4558.77	-0.68217	0.200239	-3.40678	0.000657349	0.00843678
AT1G17480	461.979	-1.47481	0.432953	-3.4064	0.000658245	0.00844269
AT1G17490	402.764	-1.34547	0.395027	-3.40602	0.000659165	0.00844891
AT1G17500	49.2251	1.85948	0.545981	3.40576	0.000659798	0.00845142
AT1G17510	605.275	-0.829668	0.24367	-3.40488	0.000661931	0.00847315
AT1G17520	39.155	1.91634	0.562862	3.40464	0.000662516	0.00847504
AT1G17530	225.138	0.893689	0.262594	3.40331	0.000665757	0.00851089
AT1G17540	1173.88	0.788861	0.231901	3.40172	0.000669625	0.0085547
AT1G17550	7584.35	0.69687	0.204903	3.40098	0.000671439	0.00857222
AT1G17560	213.989	-0.823326	0.242106	-3.40069	0.000672167	0.00857409
AT1G17580	1064.78	0.974738	0.28664	3.40056	0.000672469	0.00857409
AT1G17590	9715.39	0.642102	0.188869	3.39972	0.00067454	0.00859484
AT1G17600	300.033	-1.06806	0.314204	-3.39925	0.00067572	0.00860423
AT1G17610	3969.6	-0.545162	0.16043	-3.39812	0.000678501	0.00861598
AT1G17620	438.02	-0.783574	0.230587	-3.39817	0.000678379	0.00861598
AT1G17630	216.647	-1.06596	0.313682	-3.39822	0.00067826	0.00861598
AT1G17640	63.4411	1.4018	0.412479	3.39848	0.00067762	0.00861598
AT1G17650	1519.68	-0.802042	0.236035	-3.39798	0.000678864	0.00861598
AT1G17665	740.384	-0.851444	0.250588	-3.39779	0.000679333	0.00861628
AT1G17680	8650.53	-0.623792	0.183638	-3.39687	0.000681619	0.00863963
AT1G17690	1705.88	-0.826091	0.243318	-3.3951	0.000686027	0.00868983
AT1G17700	1348.84	-0.725014	0.213563	-3.39484	0.000686675	0.00869235
AT1G17710	202.908	0.909804	0.268032	3.39439	0.000687811	0.00870105
AT1G17720	367.946	1.77624	0.523329	3.39411	0.000688514	0.00870427
AT1G17730	8670.85	0.810712	0.238957	3.39271	0.000692052	0.00873966
AT1G17744	2530.38	-0.644003	0.189823	-3.39264	0.000692215	0.00873966
AT1G17745	2008.75	-0.749402	0.220907	-3.39239	0.000692854	0.00874011
AT1G17750	1786.64	-0.572236	0.168688	-3.39227	0.000693152	0.00874011
AT1G17760	283.477	-1.9051	0.561713	-3.3916	0.000694866	0.00875604
AT1G17780	422.906	-0.785644	0.2317	-3.39078	0.000696946	0.00877085
AT1G17790	4618.19	0.574468	0.169418	3.39084	0.000696798	0.00877085
AT1G17820	55.4299	1.85293	0.546771	3.38886	0.000701829	0.00882657
AT1G17830	386.382	1.39354	0.411303	3.38812	0.000703746	0.00884495
AT1G17840	1758.93	-0.520504	0.153643	-3.38776	0.000704671	0.00885083
AT1G17850	319.263	0.870415	0.256949	3.3875	0.000705336	0.00885345
AT1G17860	1640.72	0.855761	0.252705	3.38641	0.000708141	0.00888291
AT1G17870	1018.37	0.894776	0.264247	3.38613	0.000708851	0.00888413
AT1G17880	883.62	1.08181	0.319494	3.38602	0.000709154	0.00888413
AT1G17890	813.53	0.691215	0.204206	3.38489	0.000712072	0.00891492
AT1G17920	781.363	0.966511	0.285581	3.38437	0.000713428	0.00892614
AT1G17930	136.971	-1.00514	0.297128	-3.38286	0.00071734	0.00896929
AT1G17940	4596.33	0.93432	0.276208	3.38267	0.000717836	0.00896971
AT1G17950	652.024	-0.816114	0.241289	-3.38231	0.000718778	0.0089757
AT1G17960	745.239	-1.23657	0.365693	-3.38145	0.000721042	0.00899817
AT1G17970	1659.34	-1.02078	0.302017	-3.37987	0.000725193	0.00904114
AT1G17980	17453.3	-0.965254	0.285596	-3.37979	0.000725417	0.00904114
AT1G17990	549.011	-0.709123	0.209845	-3.37927	0.000726775	0.00905225
AT1G18000	553.094	0.680665	0.201513	3.37777	0.000730769	0.00909615
AT1G18010	4312.83	-0.870049	0.257711	-3.37606	0.00073532	0.00914324
AT1G18020	748.771	-1.22805	0.363761	-3.37599	0.000735495	0.00914324
AT1G18030	682.178	-0.976247	0.289303	-3.37448	0.000739562	0.0091879
AT1G18040	507.621	1.6268	0.482115	3.3743	0.00074004	0.00918796
AT1G18060	354.775	0.993303	0.294413	3.37384	0.000741263	0.00919726
AT1G18070	6885.47	-0.849681	0.2521	-3.37042	0.000750541	0.00930305
AT1G18080	36.4365	-1.80819	0.5365	-3.37034	0.000750749	0.00930305
AT1G18090	546.79	0.898162	0.266513	3.37005	0.000751538	0.00930688
AT1G18100	456.503	0.864547	0.256627	3.36889	0.000754724	0.00933441
AT1G18140	2572.61	-0.630906	0.18727	-3.36896	0.000754531	0.00933441
AT1G18150	275.177	-1.41735	0.420941	-3.36709	0.000759653	0.00938588
AT1G18160	2519.79	-0.582987	0.173146	-3.36702	0.000759853	0.00938588
AT1G18170	111.453	1.29399	0.384364	3.36656	0.000761126	0.00939562
AT1G18180	1675.5	-0.677983	0.201467	-3.36523	0.000764792	0.00942295
AT1G18190	10041.7	-0.801086	0.238048	-3.36523	0.000764798	0.00942295
AT1G18200	1609.57	-0.800461	0.237855	-3.36533	0.000764515	0.00942295
AT1G18210	2646.54	-0.600483	0.178502	-3.36401	0.000768182	0.00945863
AT1G18250	186.43	0.989032	0.294103	3.36288	0.000771349	0.00949161
AT1G18260	992.502	-0.708114	0.210588	-3.36256	0.000772246	0.00949662
AT1G18265	3563.29	0.539141	0.160393	3.36137	0.000775574	0.0095315
AT1G18270	1723.83	-0.662876	0.197241	-3.36074	0.000777335	0.00954709
AT1G18280	125.933	-1.19843	0.35662	-3.36053	0.000777917	0.00954819
AT1G18290	2069.04	-0.597044	0.177697	-3.35989	0.000779733	0.00955839
AT1G18300	5389.57	-1.08445	0.322762	-3.35992	0.000779662	0.00955839
AT1G18330	41.1908	2.23135	0.664317	3.35886	0.000782642	0.00958798
AT1G18335	653.394	1.12333	0.334529	3.35793	0.000785275	0.00961416
AT1G18340	737.96	-1.19469	0.355809	-3.35766	0.000786046	0.00961753
AT1G18350	2997.91	-0.536327	0.159761	-3.35706	0.000787762	0.00963135
AT1G18360	671.905	0.789946	0.235319	3.35692	0.000788169	0.00963135
AT1G18370	2678.4	-0.580435	0.172929	-3.3565	0.000789368	0.00963993
AT1G18390	396.102	0.679723	0.20256	3.35567	0.000791738	0.00966279
AT1G18400	2943.94	-0.817665	0.243691	-3.35533	0.0007927	0.00966845
AT1G18410	621.045	-0.667935	0.199111	-3.35459	0.00079484	0.00968846
AT1G18420	74.4998	-1.26022	0.375699	-3.35434	0.000795559	0.00969113
AT1G18440	151.138	1.21595	0.362592	3.35348	0.000798017	0.00971496
AT1G18450	737.057	0.758457	0.22625	3.35229	0.000801462	0.00973857
AT1G18460	342.775	0.830125	0.247628	3.35231	0.00080141	0.00973857
AT1G18470	73.8912	1.97872	0.590251	3.35234	0.000801316	0.00973857
AT1G18480	64.1303	-2.24656	0.670493	-3.35061	0.00080634	0.0097917
AT1G18485	902.657	-0.830167	0.247839	-3.34962	0.000809225	0.00982058
AT1G18490	26.7188	2.4662	0.736358	3.34919	0.000810484	0.00982972
AT1G18500	1417.74	0.785958	0.234845	3.34671	0.000817776	0.00991196
AT1G18520	97.6033	-1.33359	0.398595	-3.34571	0.000820708	0.00994128
AT1G18540	166.73	0.957022	0.28622	3.34366	0.000826798	0.0100088
AT1G18550	193.304	0.909271	0.272088	3.34182	0.000832307	0.0100692
AT1G18560	1878.15	-0.665207	0.199166	-3.33995	0.000837924	0.0101308
AT1G18570	442.864	-0.707313	0.211841	-3.33888	0.000841164	0.0101637
AT1G18580	770.182	-0.802535	0.240414	-3.33814	0.000843402	0.010182
AT1G18590	749.461	-0.683415	0.204746	-3.33786	0.000844255	0.010182
AT1G18600	393.489	-0.847612	0.253937	-3.33788	0.000844215	0.010182
AT1G18610	327.547	0.966178	0.289524	3.33712	0.000846501	0.0102027
AT1G18620	113035	-1.01144	0.303113	-3.33685	0.000847338	0.0102065
AT1G18630	1977.93	-0.547664	0.164146	-3.33645	0.000848549	0.0102147
AT1G18640	80064.3	-0.662218	0.198503	-3.33605	0.000849767	0.010223
AT1G18650	137.64	1.10024	0.329897	3.33511	0.000852653	0.010245
AT1G18660	995.365	-0.581972	0.174495	-3.33518	0.000852431	0.010245
AT1G18670	5092.65	-0.582054	0.174567	-3.33428	0.000855199	0.0102693
AT1G18680	4629.4	0.945791	0.283707	3.33369	0.000857007	0.0102846
AT1G18690	465.716	0.65373	0.19614	3.33297	0.000859238	0.010305
AT1G18700	625.151	0.720259	0.216171	3.3319	0.000862558	0.0103384
AT1G18710	53.8083	1.57685	0.473337	3.33135	0.000864267	0.0103525
AT1G18720	397.761	0.879203	0.264044	3.32976	0.000869216	0.0104054
AT1G18730	511.621	-0.602712	0.181067	-3.32867	0.000872629	0.0104398
AT1G18740	26.3168	2.15722	0.648242	3.3278	0.000875355	0.0104595
AT1G18750	13670.2	-1.06382	0.319667	-3.32791	0.000875008	0.0104595
AT1G18773	1175.67	0.570346	0.171555	3.32457	0.000885536	0.0105746
AT1G18800	410.945	1.05521	0.31742	3.32432	0.000886338	0.0105777
AT1G18810	2772.16	-0.655545	0.197225	-3.32384	0.000887863	0.0105894
AT1G18830	41.7252	1.66511	0.501153	3.32256	0.000891966	0.0106318
AT1G18835	177.342	1.8095	0.544645	3.32235	0.00089263	0.0106332
AT1G18840	548.061	1.44589	0.435334	3.32133	0.000895894	0.0106655
AT1G18850	1686.95	0.66178	0.199305	3.32044	0.000898771	0.0106932
AT1G18860	792.904	-0.619497	0.186609	-3.31976	0.000900934	0.0107113
AT1G18870	1638.82	0.712355	0.214589	3.31962	0.000901398	0.0107113
AT1G18880	226.609	0.926512	0.279184	3.31865	0.000904539	0.010742
AT1G18890	593.572	-0.905027	0.272746	-3.31821	0.000905979	0.0107525
AT1G18900	923.369	0.836801	0.25228	3.31696	0.000910034	0.0107941
AT1G18910	652.524	0.722322	0.217783	3.31671	0.000910853	0.0107972
AT1G18940	18376.2	-0.679545	0.204952	-3.31562	0.000914398	0.0108326
AT1G18950	534.022	1.03607	0.312545	3.31493	0.000916652	0.010846
AT1G18970	386.73	0.899548	0.271361	3.31496	0.000916578	0.010846
AT1G18980	29.7911	1.97777	0.596705	3.31449	0.000918103	0.0108566
AT1G18990	4798.31	-0.535855	0.161706	-3.31375	0.000920533	0.0108787
AT1G19000	51.7805	1.77364	0.535338	3.31312	0.000922604	0.0108899
AT1G19010	4659.03	-0.679634	0.205128	-3.31322	0.000922277	0.0108899
AT1G19020	104.07	-1.47865	0.446386	-3.3125	0.000924675	0.0109077
AT1G19025	13112.6	-0.777607	0.23478	-3.31206	0.000926113	0.010918
AT1G19050	4235.04	-0.680973	0.205647	-3.31137	0.000928403	0.0109383
AT1G19100	52.3545	1.43517	0.4335	3.31066	0.000930747	0.0109593
AT1G19110	1133.66	0.704238	0.212743	3.31027	0.000932062	0.0109681
AT1G19115	150.72	0.910606	0.275108	3.30999	0.000932982	0.0109723
AT1G19120	638.153	0.943723	0.285146	3.30961	0.000934273	0.0109808
AT1G19130	2056.51	1.24067	0.375205	3.30665	0.000944197	0.0110907
AT1G19140	17.0248	2.76041	0.834867	3.30641	0.000945002	0.0110935
AT1G19150	19296	-0.584727	0.176902	-3.30537	0.000948503	0.0111278
AT1G19160	145.605	1.20839	0.365647	3.30479	0.000950465	0.0111441
AT1G19170	46.2097	1.89273	0.572774	3.30449	0.000951486	0.0111494
AT1G19180	1593.73	0.802115	0.242814	3.30341	0.000955169	0.0111857
AT1G19190	7083.15	-0.733208	0.222002	-3.30271	0.000957568	0.011203
AT1G19200	236.191	-0.984136	0.297985	-3.30264	0.000957798	0.011203
AT1G19210	323.189	-0.982384	0.297481	-3.30234	0.000958827	0.0112083
AT1G19220	65.905	1.51606	0.459319	3.30067	0.000964548	0.0112614
AT1G19230	3761.15	-1.09064	0.330446	-3.3005	0.000965111	0.0112614
AT1G19240	554.86	0.979041	0.296618	3.30068	0.000964516	0.0112614
AT1G19270	58.9383	1.41569	0.429171	3.29866	0.000971485	0.0113153
AT1G19290	5122.41	-0.492811	0.149392	-3.29879	0.000971033	0.0113153
AT1G19300	8121.14	-0.994246	0.301401	-3.29875	0.000971156	0.0113153
AT1G19310	12522.8	-0.556583	0.168742	-3.29843	0.000972266	0.0113176
AT1G19320	8264.53	-0.742958	0.225287	-3.29783	0.000974336	0.0113303
AT1G19330	314.609	0.969037	0.293845	3.29778	0.000974522	0.0113303
AT1G19340	2227.67	-0.552741	0.167643	-3.29712	0.000976815	0.0113501
AT1G19350	21.7765	2.96066	0.898142	3.29643	0.000979233	0.0113714
AT1G19360	5054.66	-0.590788	0.179253	-3.29584	0.000981279	0.0113884
AT1G19370	1747.68	0.806271	0.244703	3.2949	0.000984554	0.0114148
AT1G19380	570.922	1.23466	0.374724	3.29485	0.000984738	0.0114148
AT1G19394	574.061	-0.87338	0.265092	-3.29463	0.000985508	0.0114169
AT1G19396	1086.33	-0.724189	0.219951	-3.2925	0.000993003	0.0114969
AT1G19397	317.251	0.777404	0.236226	3.29093	0.000998556	0.0115543
AT1G19400	60.8574	1.65173	0.501959	3.29055	0.0009999	0.0115561
AT1G19430	280.702	0.808624	0.24573	3.2907	0.000999398	0.0115561
AT1G19440	347.931	-1.10014	0.33442	-3.28968	0.00100303	0.0115853
AT1G19450	24211.2	-0.672328	0.204405	-3.28919	0.00100475	0.0115983
AT1G19480	488.526	0.716611	0.217916	3.28847	0.00100734	0.011609
AT1G19485	1153.53	-0.711037	0.216224	-3.28843	0.00100748	0.011609
AT1G19490	127.686	1.22276	0.371809	3.28867	0.00100662	0.011609
AT1G19500	5209.8	-0.551915	0.167859	-3.28797	0.00100913	0.0116212
AT1G19510	2746.04	-0.702899	0.213834	-3.28713	0.00101213	0.0116488
AT1G19520	4372.78	-0.653631	0.198959	-3.28525	0.00101892	0.0116931
AT1G19530	18614.1	-0.636853	0.193856	-3.28518	0.00101917	0.0116931
AT1G19540	290.354	1.03608	0.315338	3.28561	0.00101763	0.0116931
AT1G19550	102.207	-1.44156	0.438799	-3.28525	0.00101894	0.0116931
AT1G19570	481.377	-0.709301	0.215879	-3.28563	0.00101753	0.0116931
AT1G19580	800.439	0.689457	0.209876	3.28506	0.0010196	0.0116931
AT1G19600	465.007	-0.814888	0.248113	-3.28434	0.00102221	0.0117162
AT1G19610	249.873	1.1279	0.343488	3.28365	0.00102471	0.0117378
AT1G19630	13.1982	3.99546	1.21701	3.28301	0.00102703	0.0117576
AT1G19640	1196.24	-1.18748	0.361752	-3.28259	0.00102857	0.0117682
AT1G19650	3263.37	-0.574666	0.175097	-3.28199	0.00103076	0.0117793
AT1G19660	1173.74	1.51399	0.461302	3.282	0.00103074	0.0117793
AT1G19670	1685.21	0.557499	0.169878	3.28177	0.00103159	0.0117819
AT1G19680	2543.46	-0.748023	0.227953	-3.28148	0.00103265	0.0117871
AT1G19690	1897.53	-0.733656	0.223627	-3.28072	0.00103544	0.0118119
AT1G19700	1725.34	-0.521528	0.158987	-3.28032	0.00103688	0.0118162
AT1G19710	368.857	-0.826064	0.251827	-3.28028	0.00103703	0.0118162
AT1G19715	1447.23	-0.89719	0.273536	-3.27997	0.00103818	0.0118224
AT1G19720	51.8256	1.6914	0.515735	3.27959	0.00103957	0.0118313
AT1G19730	1369.49	-0.639192	0.19493	-3.27908	0.00104146	0.0118458
AT1G19740	2593.57	-0.613169	0.187027	-3.27851	0.00104355	0.0118626
AT1G19750	46.8077	2.22119	0.677569	3.27818	0.00104479	0.0118697
AT1G19770	135.84	-1.00825	0.307625	-3.27754	0.00104717	0.0118898
AT1G19790	680.326	-0.606585	0.185115	-3.27681	0.00104987	0.0119135
AT1G19800	1822.1	-0.623483	0.190366	-3.27519	0.00105591	0.0119751
AT1G19830	820.354	-0.677456	0.206886	-3.27454	0.00105836	0.0119957
AT1G19835	2242.31	-0.596621	0.182254	-3.27356	0.00106201	0.0120302
AT1G19840	1408.77	-1.22803	0.375165	-3.2733	0.00106299	0.0120342
AT1G19850	13691.9	-0.868478	0.265418	-3.27212	0.00106745	0.0120706
AT1G19860	61.7375	1.61817	0.494522	3.2722	0.00106715	0.0120706
AT1G19870	1398.49	-0.957274	0.292573	-3.27191	0.00106823	0.0120723
AT1G19880	63.9252	1.55251	0.474577	3.27136	0.00107031	0.0120889
AT1G19890	333.879	0.781928	0.239041	3.27111	0.00107127	0.0120926
AT1G19900	291.853	0.957966	0.292921	3.27038	0.00107401	0.0121165
AT1G19910	83627.4	-0.72158	0.220789	-3.2682	0.00108236	0.0121965
AT1G19920	7409.84	-0.725365	0.221943	-3.26824	0.00108217	0.0121965
AT1G19940	1160.72	-0.775457	0.237425	-3.26612	0.00109034	0.0122792
AT1G19950	73.7944	1.64516	0.503775	3.26567	0.00109206	0.0122915
AT1G19960	1967.43	-0.565182	0.1731	-3.26506	0.0010944	0.0123035
AT1G19970	279.629	0.801192	0.245376	3.26516	0.00109401	0.0123035
AT1G19980	1656.37	-0.767766	0.235239	-3.26377	0.00109942	0.0123385
AT1G19990	3031.15	0.680734	0.208562	3.26393	0.00109877	0.0123385
AT1G20010	2665.79	-0.498812	0.152829	-3.26385	0.00109911	0.0123385
AT1G20020	10.8141	-3.71979	1.14001	-3.26294	0.00110263	0.0123675
AT1G20030	2013.08	-0.538959	0.165204	-3.26238	0.0011048	0.0123846
AT1G20050	83.4422	1.13579	0.348177	3.2621	0.00110591	0.0123899
AT1G20060	452.036	-0.711489	0.218213	-3.26053	0.00111203	0.0124513
AT1G20070	913.697	-0.574569	0.17623	-3.26034	0.00111277	0.0124523
AT1G20080	1932.26	1.39623	0.42835	3.25956	0.00111585	0.0124797
AT1G20090	652.145	0.778536	0.238907	3.25874	0.00111907	0.0125084
AT1G20100	459.959	0.835804	0.256523	3.2582	0.00112122	0.0125253
AT1G20110	3059.78	-0.681533	0.209274	-3.25666	0.00112731	0.012586
AT1G20120	5437.51	-0.648694	0.199223	-3.25612	0.00112946	0.0126028
AT1G20140	5505.45	-0.766101	0.235297	-3.25589	0.00113037	0.0126057
AT1G20160	2435.96	1.03292	0.317307	3.25526	0.00113289	0.0126265
AT1G20180	3742.78	1.1083	0.340579	3.25415	0.00113733	0.0126676
AT1G20190	1023.76	0.918389	0.282233	3.25401	0.00113788	0.0126676
AT1G20200	34867.2	-0.669071	0.20565	-3.25345	0.00114013	0.0126853
AT1G20220	592.589	0.911283	0.280113	3.25327	0.00114085	0.0126861
AT1G20225	259.656	0.835136	0.256806	3.25201	0.00114592	0.0127351
AT1G20230	2790.37	-0.578977	0.178086	-3.2511	0.00114958	0.0127685
AT1G20260	53.7654	1.65768	0.509959	3.25061	0.00115157	0.0127833
AT1G20270	6602.28	-0.706763	0.217477	-3.24983	0.00115476	0.0128113
AT1G20300	255.762	-0.783249	0.241028	-3.24962	0.00115559	0.0128132
AT1G20310	839.118	-0.778176	0.239494	-3.24925	0.0011571	0.0128226
AT1G20320	1353	0.9557	0.294333	3.24701	0.00116625	0.0129167
AT1G20330	15800.7	-0.632215	0.194733	-3.24658	0.001168	0.0129287
AT1G20340	3384.1	-0.580747	0.178903	-3.24616	0.00116973	0.0129404
AT1G20350	4213.89	-0.564043	0.173801	-3.24533	0.00117313	0.0129706
AT1G20370	32.9972	2.12677	0.655382	3.24508	0.00117416	0.0129746
AT1G20380	49.425	1.43945	0.44365	3.24457	0.00117629	0.0129908
AT1G20410	1111.51	-0.550419	0.169661	-3.24422	0.00117771	0.012999
AT1G20430	30.5823	1.77048	0.545857	3.24349	0.00118077	0.0130254
AT1G20440	412.262	-0.842729	0.259866	-3.24293	0.00118306	0.0130433
AT1G20450	142.901	1.18761	0.366267	3.24248	0.00118493	0.0130491
AT1G20460	851.675	-0.577009	0.177951	-3.24252	0.00118476	0.0130491
AT1G20470	214.426	0.861499	0.265756	3.2417	0.0011882	0.0130776
AT1G20480	137.036	1.74844	0.539492	3.24089	0.00119155	0.0130997
AT1G20490	2037	-0.520816	0.160701	-3.24089	0.00119156	0.0130997
AT1G20500	21.1517	2.32353	0.717223	3.23962	0.00119689	0.0131509
AT1G20510	5488.6	-0.574095	0.177227	-3.23932	0.00119817	0.0131575
AT1G20520	1654.47	-0.902206	0.278684	-3.23738	0.00120633	0.0132396
AT1G20530	3652.06	-0.809709	0.250188	-3.23641	0.00121045	0.0132399
AT1G20540	38.7597	2.03691	0.629292	3.23683	0.00120865	0.0132399
AT1G20550	281.712	1.13219	0.349814	3.23654	0.00120988	0.0132399
AT1G20560	495.675	1.73502	0.53602	3.23685	0.00120856	0.0132399
AT1G20570	620.829	0.753854	0.232884	3.23704	0.00120776	0.0132399
AT1G20575	30513.5	-0.707493	0.218598	-3.23651	0.00121003	0.0132399
AT1G20580	2269.24	-0.623942	0.192841	-3.23553	0.00121415	0.0132654
AT1G20590	289.508	-1.02775	0.317645	-3.23555	0.00121411	0.0132654
AT1G20610	248.512	0.774166	0.23932	3.23485	0.00121706	0.0132897
AT1G20620	911.693	-0.82001	0.2536	-3.23348	0.00122292	0.0133462
AT1G20630	87.957	1.8275	0.565448	3.23195	0.00122948	0.0133663
AT1G20640	6888.88	-0.960285	0.297101	-3.23218	0.00122849	0.0133663
AT1G20650	3788.1	-0.535881	0.16577	-3.23267	0.00122637	0.0133663
AT1G20670	17.9531	-2.20868	0.683292	-3.23241	0.00122751	0.0133663
AT1G20680	881.189	0.703496	0.21768	3.2318	0.00123015	0.0133663
AT1G20690	762.595	0.739071	0.22869	3.23176	0.00123028	0.0133663
AT1G20693	1029.65	-0.85089	0.263235	-3.23243	0.00122741	0.0133663
AT1G20696	3672.46	-1.37749	0.426151	-3.2324	0.00122755	0.0133663
AT1G20700	1153.56	1.18291	0.366063	3.23143	0.00123173	0.0133746
AT1G20720	689.507	-0.61547	0.190495	-3.23089	0.00123404	0.0133921
AT1G20730	774.846	0.999664	0.309537	3.22955	0.00123985	0.0134477
AT1G20740	5828.23	1.01786	0.315193	3.22931	0.0012409	0.0134515
AT1G20760	4147.05	-0.81282	0.251875	-3.22708	0.00125058	0.0135489
AT1G20770	2375.57	1.17363	0.36376	3.22639	0.00125362	0.0135742
AT1G20780	1203.46	0.722576	0.224001	3.22577	0.00125636	0.0135963
AT1G20790	4056.43	-0.536695	0.166423	-3.22489	0.00126022	0.0136153
AT1G20795	2996.98	-0.901796	0.279634	-3.22491	0.00126013	0.0136153
AT1G20800	1404.77	0.696114	0.215843	3.22509	0.00125933	0.0136153
AT1G20810	844.873	0.773942	0.24002	3.22448	0.001262	0.0136269
AT1G20816	888.233	0.998542	0.309918	3.22196	0.00127318	0.01374
AT1G20823	155.516	-4.7828	1.48456	-3.22169	0.00127437	0.0137452
AT1G20830	973.08	0.689152	0.213969	3.2208	0.00127833	0.0137763
AT1G20840	1775.65	-0.498918	0.154909	-3.22072	0.00127868	0.0137763
AT1G20850	18795.2	-0.578566	0.179667	-3.22021	0.00128095	0.0137931
AT1G20870	50.028	2.45288	0.761844	3.21966	0.00128341	0.0137967
AT1G20880	2220.4	-0.489688	0.152085	-3.21982	0.0012827	0.0137967
AT1G20890	956.934	0.562774	0.174791	3.2197	0.00128324	0.0137967
AT1G20900	2239.5	-0.556229	0.172819	-3.21856	0.00128835	0.0138344
AT1G20910	73.5806	-2.94854	0.916104	-3.21856	0.00128834	0.0138344
AT1G20920	2575.41	0.790937	0.245755	3.2184	0.0012891	0.0138348
AT1G20930	3024.22	0.843701	0.262242	3.21726	0.0012942	0.013879
AT1G20950	2436.47	-0.619061	0.192424	-3.21716	0.00129465	0.013879
AT1G20960	1598.83	-0.739782	0.23004	-3.21589	0.0013004	0.0139253
AT1G20970	1293.34	-0.735457	0.228691	-3.21594	0.00130018	0.0139253
AT1G20980	19.2674	-2.08234	0.647649	-3.21523	0.00130339	0.0139495
AT1G20990	7050.03	-0.647226	0.201359	-3.21428	0.00130772	0.0139804
AT1G21000	384.78	-0.817199	0.254239	-3.21429	0.00130767	0.0139804
AT1G21010	1322.72	0.580379	0.180694	3.21195	0.00131839	0.0140868
AT1G21050	3566.11	-0.529935	0.165014	-3.21146	0.00132064	0.0141031
AT1G21060	104.515	1.226	0.38184	3.21077	0.0013238	0.014129
AT1G21065	356.175	0.831731	0.259063	3.21054	0.00132487	0.0141326
AT1G21070	274.283	-1.02793	0.320324	-3.20902	0.00133189	0.014196
AT1G21080	13634.4	-0.555449	0.173095	-3.20894	0.00133227	0.014196
AT1G21090	719.974	-0.911905	0.284236	-3.20827	0.00133538	0.0142213
AT1G21110	464.354	-0.600418	0.187173	-3.20783	0.00133742	0.0142353
AT1G21130	323.199	-0.659888	0.205814	-3.20623	0.00134486	0.0143019
AT1G21140	202.345	1.01287	0.315912	3.20616	0.00134518	0.0143019
AT1G21150	3845.76	-0.612527	0.191056	-3.20601	0.00134589	0.0143019
AT1G21160	107.551	1.45689	0.454569	3.20498	0.0013507	0.014345
AT1G21170	30199.8	-0.809867	0.25272	-3.20461	0.00135247	0.0143561
AT1G21190	771.304	-0.603539	0.188348	-3.20438	0.00135355	0.0143596
AT1G21200	108.095	1.09177	0.340766	3.20387	0.00135592	0.0143769
AT1G21210	264.963	1.78978	0.558662	3.20369	0.00135678	0.0143782
AT1G21250	15.8595	4.21731	1.31682	3.20264	0.00136173	0.0144227
AT1G21270	15.8248	3.90773	1.2203	3.20229	0.00136341	0.0144327
AT1G21280	1759.88	0.999434	0.31212	3.20208	0.0013644	0.0144352
AT1G21310	1081.29	-0.753394	0.235312	-3.20168	0.00136627	0.0144472
AT1G21326	296.203	1.15082	0.359504	3.20112	0.00136893	0.0144674
AT1G21350	2842.19	-0.773484	0.241671	-3.20057	0.00137155	0.0144872
AT1G21360	1345.26	-0.883003	0.27595	-3.19986	0.00137493	0.014515
AT1G21370	165.928	-1.15691	0.361612	-3.1993	0.0013776	0.0145274
AT1G21380	2065.31	-0.662133	0.20696	-3.19933	0.00137748	0.0145274
AT1G21390	52.2147	-1.87554	0.586454	-3.1981	0.00138334	0.0145421
AT1G21400	550.036	1.09899	0.343637	3.1981	0.00138337	0.0145421
AT1G21410	803.825	1.27643	0.399051	3.19866	0.00138068	0.0145421
AT1G21440	19115.7	-0.946746	0.296036	-3.19807	0.00138349	0.0145421
AT1G21450	54.3644	1.58502	0.495551	3.1985	0.00138146	0.0145421
AT1G21460	4111.87	-0.831512	0.259971	-3.19848	0.00138152	0.0145421
AT1G21480	37026.5	-0.676894	0.211677	-3.19777	0.00138494	0.0145493
AT1G21475	285.258	1.16477	0.364294	3.19733	0.00138704	0.0145635
AT1G21500	1320.37	-0.596736	0.186659	-3.19694	0.00138894	0.0145757
AT1G21510	5061.43	-0.827489	0.258917	-3.19597	0.00139363	0.0146169
AT1G21520	1130.09	-0.548359	0.17159	-3.19575	0.00139467	0.0146199
AT1G21530	2373.32	-1.18967	0.372308	-3.1954	0.00139639	0.0146226
AT1G21550	228.815	-1.11546	0.349086	-3.19539	0.00139643	0.0146226
AT1G21560	23949.3	-0.703554	0.220229	-3.19466	0.00139998	0.0146518
AT1G21580	38.8875	2.55992	0.80146	3.19407	0.00140284	0.0146738
AT1G21590	10.329	5.93211	1.85743	3.19371	0.00140456	0.0146839
AT1G21600	31506.4	-1.01624	0.318321	-3.19251	0.00141042	0.0147292
AT1G21610	1221.95	-0.758789	0.237677	-3.19252	0.00141036	0.0147292
AT1G21630	1507.21	-0.740405	0.231956	-3.192	0.0014129	0.0147472
AT1G21640	175.079	1.09688	0.343704	3.19136	0.00141606	0.014765
AT1G21650	505.419	1.68318	0.527421	3.19134	0.00141612	0.014765
AT1G21651	16596.3	-0.475545	0.149029	-3.19096	0.00141801	0.0147767
AT1G21660	625.069	2.62129	0.821515	3.1908	0.00141879	0.0147769
AT1G21670	12453.2	-0.50737	0.159096	-3.18909	0.0014272	0.0148565
AT1G21680	374.511	0.771243	0.241978	3.18724	0.00143638	0.014944
AT1G21690	1853.61	-0.65245	0.204773	-3.18621	0.0014415	0.0149893
AT1G21695	2036.25	-0.703245	0.220797	-3.18503	0.00144738	0.015038
AT1G21700	267.757	-0.805302	0.252845	-3.18496	0.00144774	0.015038
AT1G21710	1922.52	-0.652667	0.20494	-3.18468	0.00144916	0.0150447
AT1G21720	2136.54	0.727718	0.228558	3.18395	0.00145279	0.0150744
AT1G21730	999.475	-0.567829	0.178408	-3.18276	0.00145881	0.0151287
AT1G21740	76.4919	1.26242	0.396913	3.1806	0.0014697	0.0152254
AT1G21750	24.2004	2.79341	0.878254	3.18064	0.00146952	0.0152254
AT1G21760	82.9168	1.05726	0.332442	3.1803	0.00147123	0.0152331
AT1G21770	39.0664	1.54517	0.485944	3.17972	0.00147415	0.0152552
AT1G21780	907.939	-0.723797	0.227643	-3.17953	0.00147516	0.0152575
AT1G21790	210.059	0.838184	0.263707	3.17847	0.00148054	0.0152974
AT1G21810	2414.49	0.997824	0.313933	3.17846	0.0014806	0.0152974
AT1G21830	13.6532	3.53381	1.11197	3.17797	0.0014831	0.0152988
AT1G21840	783.148	-0.649667	0.204425	-3.17802	0.00148286	0.0152988
AT1G21850	704.994	0.814907	0.256413	3.1781	0.00148243	0.0152988
AT1G21860	21.1823	2.3604	0.742985	3.17691	0.00148853	0.0153385
AT1G21880	2283.3	-0.649682	0.204498	-3.17696	0.0014883	0.0153385
AT1G21890	38.5035	1.83218	0.576933	3.17572	0.00149463	0.0153932
AT1G21900	11909.9	-0.627861	0.197761	-3.17485	0.00149913	0.0154313
AT1G21910	474.89	1.08338	0.341284	3.17441	0.0015014	0.0154465
AT1G21920	19305.4	-0.536189	0.168936	-3.17392	0.00150395	0.0154645
AT1G21930	1302.34	-1.44351	0.454829	-3.17375	0.00150485	0.0154655
AT1G21950	778.451	1.03516	0.326225	3.17315	0.00150794	0.0154891
AT1G21970	124.488	0.989826	0.311957	3.17295	0.00150896	0.0154914
AT1G21980	1486.11	-0.60855	0.191817	-3.17256	0.00151103	0.0155045
AT1G22015	742.659	0.894611	0.282027	3.17208	0.00151352	0.0155218
AT1G22020	47.2258	1.54966	0.488593	3.17168	0.0015156	0.0155349
AT1G22030	347.787	0.892813	0.281524	3.17135	0.00151731	0.0155442
AT1G22040	800.335	0.784659	0.247449	3.17099	0.0015192	0.0155554
AT1G22050	749.019	0.689529	0.217487	3.17044	0.00152208	0.0155609
AT1G22060	2970.66	-0.540064	0.170344	-3.17043	0.00152215	0.0155609
AT1G22065	923.523	-0.587967	0.185439	-3.17068	0.00152085	0.0155609
AT1G22070	4671.04	-0.870924	0.274722	-3.1702	0.00152335	0.0155649
AT1G22090	2251.28	-0.574643	0.181295	-3.16966	0.00152618	0.0155857
AT1G22100	2649.7	-0.670253	0.21149	-3.1692	0.00152862	0.0155917
AT1G22110	1400.52	-1.48516	0.468606	-3.16931	0.00152802	0.0155917
AT1G22140	787.297	0.922052	0.290952	3.16909	0.00152918	0.0155917
AT1G22150	768.335	-1.50063	0.473559	-3.16883	0.00153053	0.0155972
AT1G22160	277.806	0.814728	0.257258	3.16696	0.00154039	0.015682
AT1G22170	2280.81	-0.696985	0.220081	-3.16695	0.00154046	0.015682
AT1G22180	853.635	-0.860682	0.271923	-3.16517	0.00154992	0.01577
AT1G22190	221.089	1.1544	0.364738	3.16501	0.00155079	0.0157705
AT1G22200	9670.54	1.11238	0.351507	3.1646	0.00155297	0.0157762
AT1G22210	96.9902	1.41582	0.447377	3.16471	0.00155237	0.0157762
AT1G22220	104.471	1.07141	0.33859	3.16432	0.00155445	0.015783
AT1G22230	578.346	-0.677891	0.214287	-3.16348	0.00155895	0.0158204
AT1G22240	473.234	-0.655856	0.207384	-3.16252	0.00156408	0.0158642
AT1G22250	67.0852	1.51138	0.477928	3.16236	0.00156497	0.0158649
AT1G22260	5370.97	-0.867164	0.274255	-3.16189	0.00156748	0.0158819
AT1G22270	2917.36	0.931157	0.294514	3.16167	0.00156868	0.0158858
AT1G22275	1357.54	0.574122	0.181659	3.16044	0.00157533	0.0159449
AT1G22280	3506.04	-0.578434	0.183089	-3.15931	0.00158142	0.0159982
AT1G22300	130.225	-0.948526	0.300338	-3.15819	0.00158752	0.0160515
AT1G22310	846.532	-0.944852	0.299192	-3.15801	0.00158848	0.0160529
AT1G22330	1567.09	-0.656286	0.207856	-3.15741	0.00159176	0.0160776
AT1G22360	490.6	0.867592	0.274794	3.15724	0.0015927	0.0160787
AT1G22370	526.693	-0.652007	0.206528	-3.15699	0.00159408	0.0160843
AT1G22380	14917.6	-0.554355	0.175608	-3.15678	0.00159521	0.0160873
AT1G22400	725.191	0.694092	0.219887	3.15659	0.00159628	0.0160897
AT1G22410	278.897	-0.698838	0.221447	-3.15578	0.00160068	0.0161257
AT1G22430	11964.6	1.16868	0.370371	3.15544	0.00160256	0.0161362
AT1G22440	368.838	1.07284	0.340133	3.15419	0.00160943	0.016197
AT1G22450	641.664	0.836422	0.2652	3.15393	0.00161086	0.016203
AT1G22460	680.14	0.803902	0.254985	3.15274	0.00161743	0.0162607
AT1G22470	1504.02	-0.529356	0.168082	-3.14939	0.00163611	0.0164399
AT1G22480	148.32	-0.996925	0.316604	-3.1488	0.00163941	0.0164629
AT1G22490	3766.88	-0.812587	0.258072	-3.14868	0.00164009	0.0164629
AT1G22500	2705.01	-0.533534	0.169458	-3.14848	0.00164125	0.016466
AT1G22510	2598.5	-0.686761	0.218139	-3.14828	0.00164236	0.0164686
AT1G22520	92.5481	1.51705	0.481962	3.14765	0.00164589	0.0164955
AT1G22530	2648.17	-0.57703	0.183342	-3.14729	0.0016479	0.0165071
AT1G22540	181.238	1.17978	0.374914	3.1468	0.00165067	0.0165263
AT1G22550	275.446	0.767515	0.243966	3.146	0.00165521	0.0165632
AT1G22570	7274.66	0.931276	0.296059	3.14558	0.00165759	0.0165785
AT1G22590	2019.2	-0.8305	0.264036	-3.14541	0.00165857	0.0165797
AT1G22600	579.848	2.65733	0.845185	3.14408	0.00166613	0.0166314
AT1G22610	3038.81	1.23088	0.391477	3.1442	0.00166542	0.0166314
AT1G22620	157.793	0.825887	0.262683	3.14404	0.00166631	0.0166314
AT1G22630	1104.16	-0.835194	0.265678	-3.14363	0.00166865	0.0166461
AT1G22640	223.051	-0.766154	0.243848	-3.14193	0.00167836	0.0167344
AT1G22650	580.164	-0.631251	0.200945	-3.1414	0.0016814	0.0167475
AT1G22660	4017.89	-0.89822	0.285924	-3.14147	0.00168102	0.0167475
AT1G22690	1102.03	0.762191	0.242648	3.14113	0.00168296	0.0167544
AT1G22700	3789.31	-0.461634	0.146989	-3.1406	0.00168603	0.0167764
AT1G22710	22.0742	2.64135	0.841113	3.14031	0.00168771	0.0167845
AT1G22730	3968.22	-0.676829	0.215585	-3.1395	0.00169237	0.016805
AT1G22740	1862.05	-0.65433	0.208413	-3.13959	0.00169184	0.016805
AT1G22750	99.9543	0.997998	0.317861	3.13974	0.001691	0.016805
AT1G22760	7824.1	-0.596362	0.189965	-3.13933	0.00169333	0.0168059
AT1G22770	3985.83	-0.620375	0.197663	-3.13856	0.00169783	0.0168419
AT1G22780	219.654	-0.725638	0.231218	-3.13833	0.00169915	0.0168465
AT1G22790	9852.86	0.616343	0.196469	3.1371	0.0017063	0.0168919
AT1G22800	1246.11	0.683892	0.218002	3.13709	0.00170635	0.0168919
AT1G22830	2529.36	-0.638957	0.203676	-3.13713	0.00170611	0.0168919
AT1G22840	1073.11	0.730968	0.233114	3.13567	0.0017146	0.0169649
AT1G22850	885.054	-0.724858	0.231239	-3.13468	0.00172043	0.0170052
AT1G22860	2388.8	-0.537216	0.171378	-3.13468	0.0017204	0.0170052
AT1G22870	519.175	-0.648256	0.206892	-3.1333	0.00172852	0.0170765
AT1G22880	2009.46	-0.829899	0.265052	-3.13108	0.00174165	0.0171975
AT1G22882	769.907	0.616793	0.197036	3.13036	0.00174591	0.0172308
AT1G22885	13007.3	-0.745532	0.23818	-3.13013	0.00174731	0.0172358
AT1G22890	285.626	-0.782117	0.249899	-3.12973	0.00174969	0.0172505
AT1G22900	340.198	2.90944	0.929763	3.12923	0.00175263	0.0172707
AT1G22910	2715.78	-0.662384	0.211693	-3.12899	0.00175411	0.0172765
AT1G22920	7967.59	-1.13639	0.363236	-3.1285	0.00175699	0.0172961
AT1G22930	1495.37	1.30859	0.418339	3.12805	0.00175971	0.0173053
AT1G22940	276.208	0.757541	0.242166	3.12819	0.00175887	0.0173053
AT1G22950	1572.18	-0.654013	0.209258	-3.12539	0.00177569	0.0174499
AT1G22960	835.965	-0.645218	0.20645	-3.1253	0.00177621	0.0174499
AT1G22970	31.4956	2.30063	0.736364	3.12431	0.0017822	0.0174998
AT1G22980	1676.63	-0.534903	0.171268	-3.1232	0.00178899	0.0175576
AT1G22985	873.912	0.739488	0.236805	3.12278	0.00179154	0.0175738
AT1G22990	682.58	0.903869	0.289556	3.12156	0.00179893	0.0176374
AT1G23000	1040.99	0.542605	0.17404	3.1177	0.0018227	0.0178614
AT1G23010	1086.9	0.844764	0.271145	3.11554	0.00183607	0.0179833
AT1G23020	456.834	0.793796	0.254935	3.11372	0.00184742	0.0180853
AT1G23030	2795.91	-0.708371	0.227514	-3.11353	0.00184861	0.0180879
AT1G23040	1287.84	-0.733084	0.235468	-3.1133	0.00185008	0.0180931
AT1G23050	2354.84	-0.697382	0.224022	-3.11301	0.00185191	0.0181019
AT1G23060	653.897	-0.975379	0.313406	-3.11219	0.00185706	0.0181431
AT1G23070	1133.51	-1.10316	0.354585	-3.11113	0.00186374	0.0181992
AT1G23080	290.801	0.7373	0.237019	3.11072	0.00186632	0.0182152
AT1G23090	437.374	0.670438	0.215573	3.11004	0.00187064	0.0182482
AT1G23100	1149.87	-0.625203	0.201059	-3.10954	0.00187378	0.0182696
AT1G23110	616.527	0.842096	0.270848	3.10911	0.00187654	0.0182873
AT1G23120	274.833	-0.737495	0.237221	-3.10889	0.00187793	0.0182916
AT1G23130	123.79	0.91031	0.292864	3.1083	0.00188166	0.0182999
AT1G23140	288.055	-0.861681	0.277207	-3.10844	0.00188077	0.0182999
AT1G23149	1273.41	-0.802763	0.258276	-3.10816	0.00188255	0.0182999
AT1G23150	3044.98	-0.791747	0.25471	-3.10843	0.00188087	0.0182999
AT1G23170	5899.23	-0.496311	0.159745	-3.10689	0.00189069	0.0183699
AT1G23180	2765.22	-0.469931	0.151295	-3.10605	0.00189603	0.0184058
AT1G23190	4129.09	-0.547403	0.17624	-3.10601	0.00189629	0.0184058
[truncated: 19,501 more rows]

## Sheet: Auxin_BL_det2_p<0.05_log2>1
Genes upregulated in det2-1-/- treated with 2,4-D versus 2,4-D and epi-BL (p<0.05, Log2Fold>1)
Name	baseMean	log2FoldChange	lfcSE	stat	pvalue	padj
AT1G01080	461.244	1.11437	0.2753	4.04784	5.17e-05	0.00128031
AT1G01250	157.567	1.68088	0.363125	4.62894	3.68e-06	0.000160174
AT1G01300	5828.23	1.01786	0.315193	3.22931	0.0012409	0.0134515
AT1G01470	638.697	1.45777	0.383581	3.80043	0.000144446	0.00276357
AT1G01630	61.2669	1.68768	0.617055	2.73505	0.00623702	0.0441853
AT1G02460	263.872	1.54392	0.345916	4.46328	8.07e-06	0.000301014
AT1G02730	362.474	1.17914	0.343742	3.43029	0.000602928	0.00791561
AT1G03010	534.443	1.48215	0.323173	4.58623	4.51e-06	0.00018932
AT1G03130	4351.98	1.01043	0.340237	2.96977	0.00298018	0.025957
AT1G03170	1762.6	2.30218	0.266803	8.62877	6.2e-18	8.59e-15
AT1G03780	45.6335	1.91008	0.501677	3.80739	0.000140442	0.00271266
AT1G03830	106.433	1.06551	0.351472	3.03156	0.00243296	0.0222664
AT1G04240	54.7317	2.35619	0.505792	4.65842	3.19e-06	0.000142712
AT1G04250	2761.45	2.00497	0.346726	5.78258	7.36e-09	9.63e-07
AT1G04430	1341.01	1.27073	0.282858	4.49246	7.04e-06	0.00027091
AT1G04520	52.7224	2.65236	0.508956	5.21138	1.87e-07	1.38e-05
AT1G04540	130.556	1.33479	0.456064	2.92676	0.00342509	0.0286086
AT1G04610	10.6752	3.5865	1.25763	2.8518	0.00434727	0.0341007
AT1G04680	4441.4	2.1916	0.342958	6.39029	1.66e-10	3.87e-08
AT1G04820	6547.36	1.05692	0.346982	3.04604	0.00231876	0.0214746
AT1G05470	158.467	1.76761	0.379198	4.66145	3.14e-06	0.00014128
AT1G05810	344.041	1.23882	0.403032	3.07375	0.00211389	0.0199682
AT1G06080	91.2087	2.68773	0.473821	5.67247	1.41e-08	1.62e-06
AT1G06149	254.998	1.04783	0.290712	3.60438	0.000312903	0.00491497
AT1G06350	68.9129	3.7565	0.76515	4.9095	9.13e-07	5.3e-05
AT1G06850	69.1005	1.31004	0.374692	3.4963	0.000471751	0.00664391
AT1G07730	9.26328	6.83066	1.71503	3.98282	6.81e-05	0.00158831
AT1G07880	38.6113	2.10187	0.731034	2.8752	0.00403778	0.0322507
AT1G08465	56.7582	2.48654	0.66072	3.76338	0.000167633	0.00311091
AT1G08530	109.405	1.20518	0.429282	2.80743	0.00499381	0.0375951
AT1G09580	519.577	1.2359	0.254226	4.86143	1.17e-06	6.42e-05
AT1G09750	579.848	2.65733	0.845185	3.14408	0.00166613	0.0166314
AT1G10155	79.37	1.90932	0.548782	3.4792	0.000502922	0.00694176
AT1G10640	1001.3	2.54039	0.495743	5.12442	2.98e-07	2.06e-05
AT1G10750	51.7805	1.77364	0.535338	3.31312	0.000922604	0.0108899
AT1G11000	72.4997	1.73329	0.609215	2.84513	0.00443935	0.0346261
AT1G11130	259.303	1.00886	0.258175	3.90767	9.32e-05	0.00199919
AT1G11350	87.957	1.8275	0.565448	3.23195	0.00122948	0.0133663
AT1G11420	41.8558	1.4908	0.485986	3.06759	0.00215795	0.0202856
AT1G11545	146.85	2.35036	0.629755	3.73218	0.000189827	0.00341812
AT1G11850	370.36	2.58482	0.537347	4.81034	1.51e-06	7.77e-05
AT1G11860	3637.23	1.0794	0.289	3.73495	0.000187753	0.00338707
AT1G12260	151.138	1.21595	0.362592	3.35348	0.000798017	0.00971496
AT1G12330	1457.82	1.07968	0.222708	4.84795	1.25e-06	6.74e-05
AT1G12380	2353.77	1.03454	0.178181	5.80615	6.39e-09	8.55e-07
AT1G12500	1126.61	1.25709	0.214762	5.8534	4.82e-09	6.72e-07
AT1G12570	97.0475	3.10067	0.668741	4.63658	3.54e-06	0.000155382
AT1G13250	2740.96	1.5201	0.246681	6.16223	7.17e-10	1.41e-07
AT1G13635	104.298	2.8571	0.609081	4.69084	2.72e-06	0.000125862
AT1G13650	34.2873	2.0236	0.664854	3.04368	0.00233701	0.021592
AT1G13670	65.3446	3.30802	0.620395	5.33211	9.71e-08	8.15e-06
AT1G14185	16.8657	4.09916	1.18126	3.47016	0.000520154	0.00712379
AT1G14190	137.305	4.23406	0.570095	7.42693	1.11e-13	5.99e-11
AT1G14210	253.255	1.15679	0.228989	5.05174	4.38e-07	2.88e-05
AT1G14280	50.028	2.45288	0.761844	3.21966	0.00128341	0.0137967
AT1G14390	83.8028	1.74366	0.591946	2.94564	0.00322284	0.0273885
AT1G14440	605.205	1.9574	0.321679	6.08494	1.17e-09	2.15e-07
AT1G14630	68.3827	2.43526	0.419682	5.80265	6.53e-09	8.67e-07
AT1G14720	774.465	1.86409	0.397421	4.69047	2.73e-06	0.000125862
AT1G14840	472.161	1.35363	0.276138	4.90201	9.49e-07	5.46e-05
AT1G15080	88.3886	1.23126	0.352203	3.49589	0.000472481	0.00664455
AT1G15260	392.446	1.53147	0.248214	6.16999	6.83e-10	1.35e-07
AT1G15550	357.248	1.70424	0.378503	4.50258	6.71e-06	0.000260904
AT1G15570	94.8801	1.43587	0.411562	3.48884	0.000485126	0.00676838
AT1G15580	97.8037	2.08946	0.501478	4.16662	3.09e-05	0.000860171
AT1G15760	94.2081	1.99366	0.4348	4.58523	4.53e-06	0.00018932
AT1G15820	20236.5	1.05527	0.360924	2.92382	0.00345766	0.0288531
AT1G16490	121.046	2.1184	0.411351	5.14987	2.61e-07	1.84e-05
AT1G18250	214.772	1.61734	0.406545	3.97827	6.94e-05	0.00161228
AT1G18370	82.776	1.75309	0.398941	4.39437	1.11e-05	0.000389591
AT1G18400	21.4144	4.43691	0.994676	4.46066	8.17e-06	0.000304132
AT1G18840	668.199	1.36818	0.24516	5.58077	2.39e-08	2.51e-06
AT1G19050	39.4969	2.56351	0.591361	4.33493	1.46e-05	0.00048921
AT1G19300	642.109	1.15404	0.413488	2.79099	0.00525465	0.0390434
AT1G19835	3728.23	1.78814	0.221888	8.05878	7.71e-16	8.3e-13
AT1G19950	180.566	1.44576	0.274131	5.27398	1.33e-07	1.06e-05
AT1G20010	3092.11	1.56455	0.33379	4.68723	2.77e-06	0.000126663
AT1G20020	3038.81	1.23088	0.391477	3.1442	0.00166542	0.0166314
AT1G20160	1510.58	1.42062	0.263161	5.39829	6.73e-08	6.13e-06
AT1G21050	2396.44	1.56361	0.196417	7.9607	1.71e-15	1.67e-12
AT1G21830	624.134	1.34435	0.288886	4.65355	3.26e-06	0.000145788
AT1G21890	97.7984	1.36582	0.355969	3.8369	0.000124597	0.00248848
AT1G22030	440.398	1.29274	0.237803	5.43616	5.44e-08	5.15e-06
AT1G22170	140.125	1.38602	0.381543	3.63267	0.000280503	0.00454575
AT1G22230	112.466	1.67633	0.43931	3.81583	0.000135728	0.00265041
AT1G22330	64.2769	2.05652	0.431714	4.76361	1.9e-06	9.5e-05
AT1G22490	299.298	1.30765	0.240452	5.43831	5.38e-08	5.11e-06
AT1G23080	1474.59	2.08842	0.32162	6.49343	8.39e-11	2.14e-08
AT1G23340	189.157	3.84225	0.381181	10.0799	6.78e-24	3.29e-20
AT1G24020	383.461	2.37917	0.323852	7.34648	2.03e-13	1.04e-10
AT1G24070	257.351	1.40733	0.287361	4.89742	9.71e-07	5.55e-05
AT1G24764	485.093	1.22158	0.261489	4.67163	2.99e-06	0.000135714
AT1G26100	138.938	1.27274	0.330504	3.85091	0.00011768	0.00237725
AT1G26310	16.1375	2.99477	1.09769	2.72825	0.00636708	0.0447493
AT1G26760	39.0664	1.54517	0.485944	3.17972	0.00147415	0.0152552
AT1G26945	48.0469	2.47979	0.629277	3.94069	8.12e-05	0.00181735
AT1G26960	419.761	1.29691	0.222969	5.81654	6.01e-09	8.15e-07
AT1G27045	1148.52	1.75101	0.292542	5.98547	2.16e-09	3.53e-07
AT1G27380	86.1386	1.57238	0.583754	2.69356	0.00706942	0.0483929
AT1G27440	308.919	1.05165	0.306018	3.43655	0.000589171	0.00778854
AT1G27480	285.258	1.16477	0.364294	3.19733	0.00138704	0.0145635
AT1G27940	288.292	1.90071	0.363753	5.22529	1.74e-07	1.32e-05
AT1G28290	1142.19	3.45307	0.488653	7.06649	1.59e-12	6.7e-10
AT1G28400	865.837	1.45822	0.261197	5.58286	2.37e-08	2.5e-06
AT1G29430	34.7049	2.23798	0.737447	3.03476	0.00240724	0.0220831
AT1G29440	41.1908	2.23135	0.664317	3.35886	0.000782642	0.00958798
AT1G29460	186.299	2.24615	0.527928	4.25466	2.09e-05	0.000627565
AT1G29470	4097.72	1.00463	0.185259	5.42284	5.87e-08	5.52e-06
AT1G29500	129.555	2.73239	0.495402	5.51551	3.48e-08	3.44e-06
AT1G29510	59.1281	1.98716	0.727647	2.73094	0.00631544	0.0444879
AT1G29670	3163.37	1.467	0.378718	3.87358	0.000107246	0.0022286
AT1G29720	209.374	1.63189	0.372959	4.37551	1.21e-05	0.000419539
AT1G29980	246.691	1.7528	0.460977	3.80236	0.000143324	0.00275196
AT1G30380	5838.38	1.07065	0.30133	3.55309	0.00038074	0.00567976
AT1G30795	11.5182	3.18344	1.17758	2.70338	0.00686384	0.0472481
AT1G30900	126.178	1.41085	0.490314	2.87743	0.00400925	0.0321021
AT1G31320	132.085	2.79778	0.653393	4.28192	1.85e-05	0.000581441
AT1G31335	54.7946	1.63343	0.58882	2.77407	0.00553601	0.0403608
AT1G31490	329.005	1.7242	0.340594	5.06233	4.14e-07	2.74e-05
AT1G32470	2133.24	1.13739	0.319243	3.56277	0.000366967	0.00553258
AT1G32540	174.548	1.52805	0.387714	3.94118	8.11e-05	0.00181574
AT1G32770	75.9642	2.43943	0.650668	3.74911	0.000177463	0.00325904
AT1G33170	238.821	2.15303	0.544163	3.9566	7.6e-05	0.00172843
AT1G33470	1367.4	1.13188	0.234687	4.82292	1.41e-06	7.43e-05
AT1G33700	137.036	1.74844	0.539492	3.24089	0.00119155	0.0130997
AT1G34355	37.4653	1.51192	0.523606	2.88751	0.00388301	0.0313633
AT1G35290	70.5503	2.64042	0.450337	5.86321	4.54e-09	6.43e-07
AT1G35720	7063.14	1.68129	0.317122	5.30171	1.15e-07	9.43e-06
AT1G41830	3177.59	1.7672	0.270724	6.52768	6.68e-11	1.75e-08
AT1G43650	835.408	1.74046	0.278543	6.24844	4.15e-10	8.47e-08
AT1G44110	60.1078	1.47605	0.430937	3.42521	0.000614314	0.00801169
AT1G45130	2061.55	1.02069	0.269699	3.78455	0.000153985	0.00290773
AT1G45207	247.169	1.31018	0.324926	4.03225	5.52e-05	0.00134088
AT1G47485	15.9602	2.83142	0.9585	2.95401	0.00313672	0.0267857
AT1G47655	225.317	1.47346	0.419889	3.50916	0.000449517	0.00639533
AT1G47670	1044.72	1.95352	0.420801	4.64238	3.44e-06	0.000152124
AT1G47900	311.626	1.53229	0.311603	4.91743	8.77e-07	5.2e-05
AT1G48600	2802.8	1.45947	0.248613	5.87045	4.35e-09	6.29e-07
AT1G49010	268.987	1.205	0.247746	4.86386	1.15e-06	6.4e-05
AT1G49130	132.621	1.31741	0.433423	3.03956	0.00236926	0.0217965
AT1G49210	70.888	1.36478	0.481651	2.83354	0.00460355	0.0356042
AT1G49560	265.859	1.04479	0.27382	3.81561	0.000135848	0.00265041
AT1G49600	386.484	1.08811	0.391198	2.78149	0.00541097	0.039703
AT1G49750	2247.09	1.10785	0.315161	3.5152	0.000439426	0.00627988
AT1G49975	100.233	1.04788	0.374488	2.79816	0.00513941	0.0383636
AT1G50110	251.72	1.51923	0.283431	5.36015	8.32e-08	7.34e-06
AT1G50490	142.901	1.18761	0.366267	3.24248	0.00118493	0.0130491
AT1G51680	3810.69	1.34535	0.36663	3.6695	0.00024303	0.00413791
AT1G52190	4002.1	1.56259	0.381	4.10128	4.11e-05	0.00107243
AT1G52230	2156.63	1.17856	0.2851	4.13387	3.57e-05	0.000949638
AT1G52290	92.5481	1.51705	0.481962	3.14765	0.00164589	0.0164955
AT1G52700	104.036	1.32828	0.455089	2.91874	0.00351453	0.0291769
AT1G53070	416.987	2.71682	0.254872	10.6596	1.57e-26	1.02e-22
AT1G53163	80.5507	4.18637	0.76552	5.46865	4.53e-08	4.38e-06
AT1G53180	86.8448	2.14252	0.533705	4.01443	5.96e-05	0.00143202
AT1G53520	71.8761	1.14193	0.383281	2.97934	0.00288865	0.0253483
AT1G54820	20.5682	3.03322	0.724692	4.18553	2.85e-05	0.000806377
AT1G55140	220.344	1.06573	0.283465	3.75966	0.000170141	0.00314968
AT1G55200	26.7188	2.4662	0.736358	3.34919	0.000810484	0.00982972
AT1G55260	2835.36	1.61128	0.420629	3.83065	0.000127805	0.00253169
AT1G55670	16737.9	1.00527	0.350092	2.87144	0.00408612	0.0325504
AT1G56210	849.201	1.09962	0.250226	4.39449	1.11e-05	0.000389591
AT1G56720	403.971	1.19282	0.333488	3.57681	0.000347811	0.00531948
AT1G57750	990.569	3.31921	0.80367	4.13007	3.63e-05	0.000963413
AT1G57820	101.178	1.49204	0.381019	3.91591	9.01e-05	0.0019603
AT1G58170	139.981	1.30717	0.478825	2.72995	0.00633444	0.0445894
AT1G58430	22.5388	4.33931	0.998435	4.34611	1.39e-05	0.000467367
AT1G59540	54.792	1.3573	0.492888	2.75378	0.00589118	0.0422201
AT1G59730	400.247	2.00665	0.262167	7.6541	1.95e-14	1.45e-11
AT1G59740	2998.78	2.47946	0.340883	7.27364	3.5e-13	1.74e-10
AT1G59960	175.473	1.04407	0.284811	3.66583	0.000246534	0.00416103
AT1G59990	173.077	1.16093	0.29295	3.96288	7.41e-05	0.00169548
AT1G60390	165.494	2.55426	0.445023	5.7396	9.49e-09	1.18e-06
AT1G61680	218.936	2.83058	0.602118	4.70104	2.59e-06	0.000120499
AT1G62280	406.036	2.3924	0.505107	4.73643	2.18e-06	0.000105193
AT1G62480	571.509	2.09951	0.302656	6.93695	4.01e-12	1.49e-09
AT1G62500	551.356	3.24162	0.464508	6.97861	2.98e-12	1.16e-09
AT1G62870	327.456	1.40686	0.330782	4.25313	2.11e-05	0.00063087
AT1G63100	30.1961	1.65203	0.577083	2.86273	0.00420013	0.0332717
AT1G63520	48.4532	2.83752	0.572004	4.96066	7.03e-07	4.26e-05
AT1G63710	381.325	3.17204	0.40207	7.88927	3.04e-15	2.81e-12
AT1G63910	72.8149	2.33692	0.622731	3.75269	0.000174945	0.00322194
AT1G64390	1841.76	1.88471	0.352273	5.35013	8.79e-08	7.54e-06
AT1G64400	74.6432	1.60733	0.450815	3.56538	0.000363326	0.00549181
AT1G64450	92.528	1.04872	0.38482	2.72523	0.0064257	0.0449675
AT1G64625	442.874	2.33868	0.216702	10.7922	3.75e-27	3.64e-23
AT1G64640	445.839	1.82451	0.323145	5.64612	1.64e-08	1.85e-06
AT1G64690	140.79	1.8685	0.350884	5.32512	1.01e-07	8.43e-06
AT1G64780	115.81	1.54471	0.546764	2.82519	0.0047252	0.0361114
AT1G65450	1132.09	1.55511	0.250067	6.21877	5.01e-10	1.01e-07
AT1G65480	6861.95	1.7539	0.422242	4.15378	3.27e-05	0.000893245
AT1G65900	241.486	1.50433	0.349032	4.30999	1.63e-05	0.000532122
AT1G66230	225.815	1.79665	0.364355	4.93104	8.18e-07	4.9e-05
AT1G66390	10.329	5.93211	1.85743	3.19371	0.00140456	0.0146839
AT1G66430	1148.95	1.6182	0.263511	6.14092	8.2e-10	1.59e-07
AT1G66940	90.3337	2.56763	0.419292	6.12371	9.14e-10	1.76e-07
AT1G67035	10.7381	2.83231	1.04432	2.7121	0.00668587	0.0462408
AT1G67510	648.132	1.24332	0.340072	3.65604	0.000256145	0.00427121
AT1G67740	15893.1	1.01146	0.243698	4.15046	3.32e-05	0.000902486
AT1G67750	5735.39	2.11239	0.429393	4.91948	8.68e-07	5.18e-05
AT1G67830	534.022	1.03607	0.312545	3.31493	0.000916652	0.010846
AT1G68060	1117.25	1.36742	0.214655	6.3703	1.89e-10	4.21e-08
AT1G68170	518.524	1.08846	0.302958	3.59279	0.000327154	0.00508374
AT1G68360	64.45	2.11443	0.548532	3.8547	0.00011587	0.00234803
AT1G68540	104.471	1.07141	0.33859	3.16432	0.00155445	0.015783
AT1G68590	1249.85	1.4128	0.238266	5.92954	3.04e-09	4.71e-07
AT1G68725	507.621	1.6268	0.482115	3.3743	0.00074004	0.00918796
AT1G68740	612.794	1.59307	0.336897	4.72864	2.26e-06	0.000108768
AT1G68780	156.548	1.93712	0.427217	4.53427	5.78e-06	0.000231126
AT1G68800	452.805	1.71689	0.38298	4.48297	7.36e-06	0.000279913
AT1G68810	1016.57	1.86376	0.275623	6.76201	1.36e-11	4.33e-09
AT1G68825	19.6215	3.424	0.924938	3.70187	0.000214016	0.00375603
AT1G69200	112.007	1.25337	0.362425	3.45828	0.000543636	0.00735711
AT1G69230	478.056	1.05287	0.292503	3.5995	0.000318827	0.00498228
AT1G69530	2276.34	1.2972	0.47588	2.72589	0.00641284	0.044913
AT1G69580	161.85	1.83911	0.315919	5.82145	5.83e-09	7.97e-07
AT1G69690	534.697	1.05242	0.299298	3.51629	0.000437628	0.00626325
AT1G69700	1083.48	1.00916	0.193492	5.21554	1.83e-07	1.36e-05
AT1G69730	51.3659	1.68419	0.418751	4.02193	5.77e-05	0.00139405
AT1G69760	1120.62	1.42312	0.268955	5.29131	1.21e-07	9.89e-06
AT1G69830	1338.6	1.4372	0.395284	3.63587	0.000277044	0.0045118
AT1G69970	129.368	1.64387	0.564694	2.91109	0.00360172	0.0297181
AT1G70210	100.702	1.99623	0.542526	3.67951	0.000233683	0.00402348
AT1G70270	14.3034	3.38522	0.942787	3.59065	0.000329857	0.00511213
AT1G70280	1455.87	1.00326	0.175029	5.73197	9.93e-09	1.21e-06
AT1G70550	498.638	1.13466	0.260972	4.34783	1.37e-05	0.000467367
AT1G70890	1039.89	1.72927	0.377157	4.58502	4.54e-06	0.00018932
AT1G70940	5169.92	1.14129	0.216443	5.27293	1.34e-07	1.06e-05
AT1G72110	77.3446	5.48282	0.787895	6.95881	3.43e-12	1.3e-09
AT1G72230	1293.78	2.4926	0.421794	5.90952	3.43e-09	5.19e-07
AT1G72290	47.3435	8.20492	1.29273	6.34695	2.2e-10	4.79e-08
AT1G72410	499.266	1.13139	0.276726	4.08846	4.34e-05	0.00111244
AT1G72500	529.666	1.30435	0.225651	5.78041	7.45e-09	9.63e-07
AT1G72640	181.125	1.08193	0.402964	2.68494	0.00725437	0.0492419
AT1G73040	215.4	1.4996	0.325049	4.61346	3.96e-06	0.000170887
AT1G73590	1624.33	1.64576	0.232881	7.06696	1.58e-12	6.7e-10
AT1G73600	4433.69	2.17264	0.280462	7.74663	9.44e-15	7.32e-12
AT1G73640	451.905	1.72663	0.371686	4.64541	3.39e-06	0.000150276
AT1G74055	224.807	1.38404	0.449504	3.07905	0.00207663	0.019741
AT1G74660	99	2.49004	0.716881	3.47344	0.000513841	0.00705731
AT1G74690	1549.48	1.68983	0.221188	7.63978	2.18e-14	1.56e-11
AT1G75280	4284.48	1.67145	0.295531	5.65575	1.55e-08	1.76e-06
AT1G75350	2639.01	1.03275	0.239317	4.31539	1.59e-05	0.000522791
AT1G75500	3918.81	2.07048	0.374587	5.52735	3.25e-08	3.28e-06
AT1G75580	623.357	1.16321	0.278381	4.17847	2.93e-05	0.000827254
AT1G75680	2422.07	1.02838	0.338936	3.03415	0.00241216	0.0221178
AT1G75710	1132.21	1.33829	0.336353	3.97884	6.93e-05	0.00161034
AT1G75780	271.66	1.41399	0.301619	4.68801	2.76e-06	0.000126663
AT1G75900	9670.54	1.11238	0.351507	3.1646	0.00155297	0.0157762
AT1G76100	2435.96	1.03292	0.317307	3.25526	0.00113289	0.0126265
AT1G76540	174.188	1.11084	0.320349	3.46758	0.00052516	0.00717213
AT1G77110	53.1269	2.32766	0.651583	3.57231	0.000353844	0.00539447
AT1G77460	326.057	1.09173	0.27908	3.91191	9.16e-05	0.00197549
AT1G77690	169.843	2.91695	0.559544	5.21309	1.86e-07	1.37e-05
AT1G78020	4337.21	1.42063	0.222913	6.37303	1.85e-10	4.19e-08
AT1G78170	366.706	1.64232	0.286807	5.72621	1.03e-08	1.24e-06
AT1G78430	67.9362	2.62129	0.540097	4.85336	1.21e-06	6.59e-05
AT1G78440	15.1978	4.46357	1.13711	3.92537	8.66e-05	0.00190191
AT1G78450	1609.53	1.44901	0.410491	3.52995	0.000415638	0.00604488
AT1G78490	1495.37	1.30859	0.418339	3.12805	0.00175971	0.0173053
AT1G78600	545.654	1.01228	0.363581	2.78418	0.00536624	0.0394644
AT1G78630	1974.03	1.16094	0.272543	4.25967	2.05e-05	0.000622299
AT1G78815	732.419	1.59413	0.267684	5.95529	2.6e-09	4.13e-07
AT1G78820	2432.74	1.65869	0.454514	3.64936	0.000262896	0.00435012
AT1G78950	105.056	2.98818	0.701174	4.26169	2.03e-05	0.000618844
AT1G79110	734.808	1.50602	0.361437	4.16675	3.09e-05	0.000860171
AT1G79620	1962.59	2.73888	0.730912	3.74721	0.000178811	0.00327201
AT1G79760	357.069	2.61539	0.300816	8.6943	3.49e-18	5.64e-15
AT1G80050	960.448	1.33367	0.320256	4.16439	3.12e-05	0.000867354
AT1G80370	58.9383	1.41569	0.429171	3.29866	0.000971485	0.0113153
AT1G80690	137.64	1.10024	0.329897	3.33511	0.000852653	0.010245
AT2G01150	92.4244	1.77351	0.378359	4.68737	2.77e-06	0.000126663
AT2G01210	176.96	1.08196	0.359944	3.00592	0.00264782	0.0237178
AT2G01420	653.394	1.12333	0.334529	3.35793	0.000785275	0.00961416
AT2G01520	1410.29	1.41009	0.249845	5.64386	1.66e-08	1.86e-06
AT2G01913	65.905	1.51606	0.459319	3.30067	0.000964548	0.0112614
AT2G01950	518.986	1.31036	0.338569	3.87028	0.000108712	0.00224044
AT2G01990	177.342	1.8095	0.544645	3.32235	0.00089263	0.0106332
AT2G02130	931.597	1.29404	0.305776	4.23197	2.32e-05	0.000679635
AT2G03090	165.397	1.57944	0.344926	4.57906	4.67e-06	0.000193959
AT2G03340	591.918	1.05572	0.263997	3.99897	6.36e-05	0.00150456
AT2G03350	318.604	1.18658	0.247789	4.78869	1.68e-06	8.52e-05
AT2G03420	154.989	1.61566	0.303692	5.32006	1.04e-07	8.63e-06
AT2G03500	204.084	1.57069	0.348111	4.51204	6.42e-06	0.000251043
AT2G04039	88.4839	1.02608	0.3408	3.01079	0.00260573	0.0234383
AT2G04850	2252.64	2.05093	0.398921	5.1412	2.73e-07	1.9e-05
AT2G07170	31.0264	2.21325	0.624889	3.54184	0.000397351	0.00585994
AT2G07690	236.675	1.18662	0.326248	3.63717	0.000275648	0.00449591
AT2G10940	4644.23	3.09623	0.72143	4.29179	1.77e-05	0.000562154
AT2G12480	2385.7	1.14016	0.327026	3.48646	0.000489457	0.00681411
AT2G14890	11964.6	1.16868	0.370371	3.15544	0.00160256	0.0161362
AT2G15050	87.6093	1.63534	0.538426	3.03727	0.00238735	0.0219318
AT2G15440	184.554	1.84003	0.392194	4.69164	2.71e-06	0.000125742
AT2G16430	2523.81	1.19266	0.341884	3.48851	0.000485721	0.00677181
AT2G17240	515.82	1.09618	0.289885	3.78143	0.000155933	0.00293592
AT2G18060	299.06	2.02229	0.300013	6.74067	1.58e-11	4.85e-09
AT2G18196	131.472	2.31223	0.326714	7.07724	1.47e-12	6.62e-10
AT2G19170	379.342	1.25526	0.35674	3.51868	0.000433694	0.00623471
AT2G19460	44.4723	1.38526	0.502278	2.75796	0.00581637	0.0418046
AT2G19720	99.2203	1.37295	0.386718	3.55027	0.00038484	0.0057277
AT2G19780	193.376	1.23981	0.419472	2.95565	0.00312007	0.0266788
AT2G20240	243.237	1.21852	0.238402	5.11117	3.2e-07	2.2e-05
AT2G20490	184.747	1.09968	0.40337	2.72623	0.00640625	0.0449097
AT2G20750	19.039	3.75069	0.850075	4.41218	1.02e-05	0.000364808
AT2G21140	15219.7	2.30991	0.430956	5.35998	8.32e-08	7.34e-06
AT2G21210	29.2378	2.46061	0.869165	2.83101	0.00464015	0.0357231
AT2G21220	850.295	1.40674	0.453708	3.10053	0.00193174	0.0186379
AT2G21530	485.814	1.01076	0.359664	2.81028	0.00494987	0.0373939
AT2G21590	79.4684	1.4791	0.486294	3.04157	0.00235345	0.0216717
AT2G21770	257.837	1.16388	0.3371	3.45263	0.000555142	0.00748669
AT2G21790	412.989	1.05284	0.247897	4.24706	2.17e-05	0.000644272
AT2G22122	88.4538	2.1339	0.510211	4.18239	2.88e-05	0.00081547
AT2G22170	235.915	2.41664	0.511375	4.72578	2.29e-06	0.000109962
AT2G22230	252.459	1.06723	0.292266	3.65156	0.00026065	0.00431664
AT2G22240	10988.7	1.50065	0.217779	6.89072	5.55e-12	1.92e-09
AT2G22610	53.9223	1.42294	0.479692	2.96637	0.00301336	0.0261055
AT2G23170	74347.2	1.74579	0.27352	6.38267	1.74e-10	4.02e-08
AT2G23180	1153.56	1.18291	0.366063	3.23143	0.00123173	0.0133746
AT2G23300	293.741	1.46726	0.304292	4.82189	1.42e-06	7.44e-05
AT2G23360	323.73	2.28042	0.306371	7.44334	9.82e-14	5.48e-11
AT2G23600	550.036	1.09899	0.343637	3.1981	0.00138337	0.0145421
AT2G23610	419.418	1.73483	0.324055	5.3535	8.63e-08	7.44e-06
AT2G24060	369.559	1.07191	0.285948	3.74862	0.000177808	0.00326229
AT2G24070	19.8929	4.77094	1.09514	4.35647	1.32e-05	0.000452886
AT2G24090	1131.34	1.01785	0.186229	5.46555	4.61e-08	4.41e-06
AT2G24230	1074.06	1.08727	0.23047	4.71761	2.39e-06	0.000112597
AT2G24570	313.871	1.18128	0.303271	3.89515	9.81e-05	0.00208
AT2G25060	193.582	1.41887	0.354219	4.00563	6.19e-05	0.00147179
AT2G25480	231.205	1.31795	0.286087	4.60683	4.09e-06	0.000173884
AT2G25880	46.3452	1.67276	0.485915	3.44251	0.000576351	0.00766496
AT2G26110	1393.18	1.0019	0.20399	4.91153	9.04e-07	5.28e-05
AT2G26440	4264.41	1.117	0.202352	5.52007	3.39e-08	3.39e-06
AT2G26700	38.5035	1.83218	0.576933	3.17572	0.00149463	0.0153932
AT2G26730	2033.17	1.58405	0.234696	6.74935	1.49e-11	4.65e-09
AT2G26760	53.8083	1.57685	0.473337	3.33135	0.000864267	0.0103525
AT2G27770	118.356	1.09712	0.295917	3.70753	0.000209291	0.00368981
AT2G28140	12.9343	2.68525	1.00167	2.68077	0.00734536	0.0496856
AT2G28315	367.946	1.77624	0.523329	3.39411	0.000688514	0.00870427
AT2G28410	391.397	2.70984	0.418114	6.48109	9.11e-11	2.29e-08
AT2G28470	2930.22	1.41916	0.324809	4.3692	1.25e-05	0.000430613
AT2G28620	63.9252	1.55251	0.474577	3.27136	0.00107031	0.0120889
AT2G28660	448.719	1.43151	0.400682	3.5727	0.000353321	0.005391
AT2G28671	107.814	3.15805	0.64861	4.86896	1.12e-06	6.25e-05
AT2G28760	803.825	1.27643	0.399051	3.19866	0.00138068	0.0145421
AT2G28870	360.95	1.25829	0.270507	4.6516	3.29e-06	0.000146168
AT2G28900	533.557	1.67016	0.204783	8.15574	3.47e-16	3.96e-13
AT2G28950	1186.76	1.51628	0.288094	5.26315	1.42e-07	1.11e-05
AT2G29090	184.892	2.68905	0.500012	5.37796	7.53e-08	6.79e-06
AT2G29130	545.605	3.19159	0.935869	3.4103	0.000648912	0.0083784
AT2G29680	17.2907	2.1794	0.764263	2.85163	0.00434952	0.0341007
AT2G29980	4012.63	1.64648	0.312433	5.26987	1.37e-07	1.08e-05
AT2G30300	49.425	1.43945	0.44365	3.24457	0.00117629	0.0129908
AT2G30695	281.418	1.36381	0.25462	5.35626	8.5e-08	7.42e-06
AT2G30933	21.4764	1.86736	0.617124	3.0259	0.00247895	0.0225701
AT2G31110	3742.78	1.1083	0.340579	3.25415	0.00113733	0.0126676
AT2G31900	87.7467	2.44227	0.487936	5.0053	5.58e-07	3.53e-05
AT2G31930	30.3091	2.03194	0.756272	2.68679	0.00721429	0.0490436
AT2G32560	2079.21	1.38542	0.300477	4.61075	4.01e-06	0.00017214
AT2G32590	39.155	1.91634	0.562862	3.40464	0.000662516	0.00847504
AT2G32640	102.321	1.01464	0.359354	2.82351	0.00475016	0.0362677
AT2G32690	15095	1.33508	0.288956	4.62037	3.83e-06	0.000165818
AT2G32720	533.755	1.06996	0.346883	3.0845	0.00203893	0.0194496
AT2G33330	305.375	1.06635	0.297411	3.58544	0.000336505	0.00518562
AT2G33400	53.7654	1.65768	0.509959	3.25061	0.00115157	0.0127833
AT2G33560	28.5342	1.9813	0.639315	3.09909	0.00194115	0.0187101
AT2G33570	647.055	1.29021	0.187967	6.86404	6.69e-12	2.28e-09
AT2G34150	184.926	1.20324	0.281488	4.27459	1.91e-05	0.00059323
AT2G34170	120.013	1.10095	0.384679	2.86199	0.00420994	0.0333102
AT2G34620	735.426	1.36639	0.299884	4.55639	5.2e-06	0.000213486
AT2G34655	15.8248	3.90773	1.2203	3.20229	0.00136341	0.0144327
AT2G34710	1469.39	1.1877	0.277943	4.27316	1.93e-05	0.000595126
AT2G35150	107.551	1.45689	0.454569	3.20498	0.0013507	0.014345
AT2G35190	208.95	1.85298	0.343228	5.3987	6.71e-08	6.13e-06
AT2G35210	14.8107	4.10908	0.987405	4.1615	3.16e-05	0.000877129
AT2G35370	968.763	1.06953	0.300208	3.56262	0.000367165	0.00553258
AT2G35600	78.8019	2.36846	0.436995	5.41988	5.96e-08	5.59e-06
AT2G35860	3609.06	1.61185	0.306543	5.25814	1.46e-07	1.13e-05
AT2G35960	1524.29	1.42089	0.299765	4.74002	2.14e-06	0.000103868
AT2G36200	76.4919	1.26242	0.396913	3.1806	0.0014697	0.0152254
AT2G36430	298.379	1.75789	0.577735	3.04272	0.00234448	0.0216198
AT2G36570	1283.71	1.86559	0.253543	7.35808	1.87e-13	9.78e-11
AT2G36710	87.9946	2.24741	0.79256	2.83563	0.00457358	0.0353932
AT2G36870	32.7797	2.4457	0.55637	4.39582	1.1e-05	0.000388413
AT2G36880	7544.6	1.387	0.338557	4.09681	4.19e-05	0.00108552
AT2G36910	6897.81	1.22205	0.319401	3.82608	0.000130201	0.00257113
AT2G37090	264.963	1.78978	0.558662	3.20369	0.00135678	0.0143782
AT2G37280	111.59	1.9949	0.357693	5.57714	2.45e-08	2.55e-06
AT2G37420	74.5354	1.49974	0.420501	3.56655	0.000361705	0.00547157
AT2G37660	1460.58	1.24092	0.269325	4.60751	4.08e-06	0.000173691
AT2G37930	249.873	1.1279	0.343488	3.28365	0.00102471	0.0117378
AT2G38080	2365.94	1.35197	0.442969	3.05206	0.00227279	0.0211498
AT2G38090	1087.54	1.09107	0.224671	4.85628	1.2e-06	6.53e-05
AT2G38140	1081.59	1.02232	0.266111	3.84173	0.000122172	0.0024476
AT2G38310	437.762	1.64199	0.377768	4.34656	1.38e-05	0.000467367
AT2G38580	170.485	1.02526	0.297868	3.44199	0.000577451	0.00766496
AT2G38640	385.245	1.7945	0.31953	5.61607	1.95e-08	2.16e-06
AT2G38995	28.1261	3.97467	0.873514	4.55021	5.36e-06	0.000218348
AT2G39370	51.8256	1.6914	0.515735	3.27959	0.00103957	0.0118313
AT2G39470	145.605	1.20839	0.365647	3.30479	0.000950465	0.0111441
AT2G39700	1166.94	2.25991	0.830284	2.72186	0.00649163	0.0453097
AT2G39850	340.198	2.90944	0.929763	3.12923	0.00175263	0.0172707
AT2G40080	194.239	2.43958	0.515726	4.73039	2.24e-06	0.000108104
AT2G40150	45.9725	1.84131	0.509777	3.61199	0.000303862	0.00482225
AT2G40320	599.199	2.11879	0.409865	5.16948	2.35e-07	1.67e-05
AT2G40480	239.574	1.62064	0.404137	4.01013	6.07e-05	0.00144759
AT2G40530	60.0206	2.60416	0.688964	3.77983	0.000156938	0.00294912
AT2G40750	74.0909	2.3034	0.649168	3.54824	0.000387821	0.00575882
AT2G40900	845.845	1.00457	0.265242	3.78736	0.000152256	0.00288349
AT2G40960	34.0904	1.76581	0.644068	2.74166	0.006113	0.0435044
AT2G41180	123.368	1.09787	0.376078	2.91926	0.00350865	0.0291406
AT2G41660	115.904	2.03038	0.532835	3.81053	0.00013867	0.00268654
AT2G41820	744.716	1.76773	0.191757	9.2186	3.01e-20	6.49e-17
AT2G41870	587.858	1.24842	0.334981	3.72684	0.000193893	0.00347519
AT2G42200	289.324	2.70351	0.383584	7.04804	1.81e-12	7.33e-10
AT2G42220	1557.34	1.48977	0.378398	3.93706	8.25e-05	0.0018366
AT2G42380	70.6227	2.10866	0.607367	3.4718	0.000516988	0.00709049
AT2G42410	36.99	2.68039	0.629916	4.25516	2.09e-05	0.000627565
AT2G42800	50.4414	2.42948	0.664833	3.65426	0.000257923	0.00428853
AT2G42870	17.479	2.14496	0.777394	2.75917	0.00579482	0.041699
AT2G42885	62.077	2.13027	0.504982	4.21851	2.46e-05	0.000715008
AT2G43550	384.397	1.45403	0.303097	4.79724	1.61e-06	8.23e-05
AT2G43620	41.7936	1.88577	0.529889	3.5588	0.000372547	0.00560063
AT2G44230	548.336	1.50668	0.528476	2.851	0.00435826	0.034134
AT2G44640	202.345	1.01287	0.315912	3.20616	0.00134518	0.0143019
AT2G44740	72.9434	2.06613	0.42351	4.87858	1.07e-06	5.99e-05
AT2G44940	393.93	2.32796	0.511866	4.54799	5.42e-06	0.000219274
AT2G45470	4427.48	1.45039	0.158682	9.1402	6.23e-20	1.21e-16
AT2G45560	87.2678	2.07989	0.775201	2.68303	0.0072958	0.0494539
AT2G45600	269.932	1.50756	0.424119	3.55458	0.000378587	0.00565635
AT2G45680	698.064	1.03934	0.262705	3.95629	7.61e-05	0.00172865
AT2G45730	171.334	1.18492	0.293336	4.03945	5.36e-05	0.00131106
AT2G46440	15.1036	3.68082	1.0732	3.42977	0.000604089	0.00791561
AT2G46535	258.181	1.1756	0.320024	3.67347	0.000239283	0.00409767
AT2G46590	921.95	1.04765	0.199973	5.23899	1.61e-07	1.23e-05
AT2G46630	1141.44	1.78291	0.271847	6.55849	5.44e-11	1.44e-08
AT2G46990	175.691	3.03081	0.49676	6.10116	1.05e-09	1.96e-07
AT2G47260	53.3742	1.91306	0.65478	2.92169	0.00348142	0.0289889
AT2G47360	60.8574	1.65173	0.501959	3.29055	0.0009999	0.0115561
AT2G47500	460.521	1.82858	0.320148	5.71168	1.12e-08	1.34e-06
AT2G47590	2899.6	1.05873	0.193664	5.46681	4.58e-08	4.4e-06
AT2G47750	8475.42	1.83749	0.312015	5.88912	3.88e-09	5.66e-07
AT2G47860	426.312	1.4641	0.307016	4.76881	1.85e-06	9.29e-05
AT2G47890	254.735	1.63993	0.465458	3.52326	0.000426276	0.00616463
AT2G47930	245.771	1.99238	0.485357	4.10498	4.04e-05	0.00105824
AT3G01140	290.354	1.03608	0.315338	3.28561	0.00101763	0.0116931
AT3G01440	32.9972	2.12677	0.655382	3.24508	0.00117416	0.0129746
AT3G01550	38.8875	2.55992	0.80146	3.19407	0.00140284	0.0146738
AT3G01680	402.835	1.29572	0.459931	2.8172	0.00484438	0.0368354
AT3G01840	275.814	2.47425	0.489901	5.05051	4.41e-07	2.89e-05
AT3G01860	504.677	1.63309	0.393862	4.14635	3.38e-05	0.000913694
AT3G02040	1303.19	1.1092	0.386214	2.87199	0.00407901	0.0325264
AT3G02120	55.4299	1.85293	0.546771	3.38886	0.000701829	0.00882657
AT3G02250	562.48	1.55902	0.311723	5.0013	5.69e-07	3.58e-05
AT3G02500	99.8907	2.0019	0.559525	3.57785	0.000346433	0.00530677
AT3G02640	184.697	1.63322	0.337819	4.83459	1.33e-06	7.09e-05
AT3G02870	699.97	1.15855	0.201095	5.76121	8.35e-09	1.06e-06
AT3G03660	26.7567	5.12669	1.00865	5.08272	3.72e-07	2.51e-05
AT3G03690	87.6249	1.41906	0.408125	3.47702	0.000507021	0.00698461
AT3G03780	5105.84	1.71526	0.309529	5.54151	3e-08	3.09e-06
AT3G03820	21.1517	2.32353	0.717223	3.23962	0.00119689	0.0131509
AT3G03850	13.153	4.98916	1.13833	4.38288	1.17e-05	0.000408519
AT3G04280	1133.08	1.65144	0.30033	5.49875	3.82e-08	3.73e-06
AT3G04290	1131.63	1.92705	0.287897	6.69355	2.18e-11	6.6e-09
AT3G04550	1354.79	1.06475	0.344676	3.08913	0.00200745	0.0191775
AT3G05790	69.7954	1.51169	0.543756	2.78008	0.00543451	0.0398606
AT3G05980	95.0072	2.36779	0.355133	6.66733	2.61e-11	7.76e-09
AT3G06020	260.221	2.53861	0.278851	9.10385	8.72e-20	1.54e-16
AT3G06035	1593.1	2.22124	0.237798	9.34088	9.55e-21	2.65e-17
AT3G06370	21.7765	2.96066	0.898142	3.29643	0.000979233	0.0113714
AT3G06750	2090.09	1.69818	0.271782	6.24832	4.15e-10	8.47e-08
AT3G06770	110.918	1.09889	0.400448	2.74414	0.00606691	0.0432716
AT3G07320	695.954	1.34514	0.263554	5.10386	3.33e-07	2.27e-05
AT3G08030	723.189	1.79115	0.390711	4.58434	4.55e-06	0.000189528
AT3G09032	26.5117	3.0289	0.670476	4.51753	6.26e-06	0.000247617
AT3G09070	716.084	1.57782	0.223038	7.0742	1.5e-12	6.62e-10
AT3G09540	47.272	2.80649	0.545722	5.14272	2.71e-07	1.9e-05
AT3G09820	4820.25	1.08975	0.212513	5.12791	2.93e-07	2.03e-05
AT3G10080	2084.82	2.25546	0.289015	7.80398	6e-15	4.85e-12
AT3G10200	256.323	1.05883	0.365812	2.89446	0.0037981	0.0308833
AT3G10310	20.1861	2.41459	0.696514	3.46668	0.000526924	0.00718966
AT3G10340	501.723	1.17386	0.38869	3.02003	0.00252749	0.0229045
AT3G10570	1843.35	2.12281	0.359532	5.90439	3.54e-09	5.24e-07
AT3G11630	2669.16	1.01273	0.221197	4.57841	4.69e-06	0.000194146
AT3G11680	215.455	1.95473	0.504471	3.87481	0.000106707	0.00222274
AT3G11700	1444.91	1.00497	0.250404	4.01339	5.99e-05	0.00143653
AT3G12710	442.955	1.81377	0.386836	4.68873	2.75e-06	0.000126634
AT3G12820	104.515	1.226	0.38184	3.21077	0.0013238	0.014129
AT3G12890	164.302	2.72241	0.608415	4.4746	7.66e-06	0.000287717
AT3G13175	204.341	1.99197	0.354939	5.61216	2e-08	2.18e-06
AT3G13470	596.407	1.12673	0.292735	3.84899	0.000118604	0.00238847
AT3G13560	424.184	1.10295	0.247107	4.46346	8.06e-06	0.000301014
AT3G13700	239.341	1.02816	0.281544	3.65188	0.00026033	0.00431503
AT3G13730	1486.65	1.14586	0.291111	3.93615	8.28e-05	0.00184141
AT3G13980	366.496	1.52579	0.399398	3.82024	0.000133324	0.0026196
AT3G14310	3193.33	1.60749	0.378975	4.24169	2.22e-05	0.000656836
AT3G14520	4493.02	2.18013	0.770235	2.83048	0.00464782	0.0357538
AT3G14540	127.795	3.1189	0.541457	5.7602	8.4e-09	1.06e-06
AT3G14550	1185.8	2.90277	0.747115	3.8853	0.000102202	0.00214502
AT3G14890	126.537	1.15638	0.384217	3.00971	0.00261496	0.0234995
AT3G15050	32.1966	2.93036	0.747087	3.92238	8.77e-05	0.00191915
AT3G15270	39.1697	2.42677	0.682048	3.55807	0.000373595	0.00560769
AT3G15300	699.185	1.14606	0.274935	4.16847	3.07e-05	0.000855684
AT3G15520	151.064	1.34689	0.279714	4.81523	1.47e-06	7.6e-05
AT3G15540	352.429	2.5698	0.355963	7.21929	5.23e-13	2.53e-10
AT3G15550	36.2624	2.21254	0.483534	4.57576	4.74e-06	0.000196204
AT3G15650	702.568	2.19599	0.406197	5.40622	6.44e-08	5.97e-06
AT3G15720	107.341	1.57765	0.570714	2.76434	0.00570376	0.0412735
AT3G16340	695.246	1.30726	0.267965	4.87846	1.07e-06	5.99e-05
AT3G16500	1047.09	1.28186	0.188007	6.81814	9.22e-12	2.98e-09
AT3G17120	147.848	1.87459	0.312295	6.00261	1.94e-09	3.25e-07
AT3G17600	586.411	1.41008	0.344207	4.09661	4.19e-05	0.00108552
AT3G17609	70.2963	1.79401	0.469192	3.82362	0.000131505	0.00258911
AT3G17680	51.7936	1.35942	0.500219	2.71764	0.00657488	0.0456358
AT3G18050	400.993	1.80636	0.322932	5.59363	2.22e-08	2.38e-06
AT3G18280	1766.38	1.76944	0.407025	4.34726	1.38e-05	0.000467367
AT3G18660	245.28	1.45386	0.390648	3.72167	0.000197913	0.00352269
AT3G18680	374.953	1.47613	0.313754	4.70473	2.54e-06	0.000118791
AT3G18710	318.253	1.57424	0.302612	5.2022	1.97e-07	1.44e-05
AT3G18850	972.08	1.8555	0.293741	6.31678	2.67e-10	5.63e-08
AT3G18890	840.533	1.18929	0.327845	3.62761	0.000286058	0.00461705
AT3G19050	59.1875	1.51893	0.521155	2.91455	0.00356197	0.0294573
AT3G19310	34.4649	3.45173	0.990961	3.48322	0.000495421	0.00686754
AT3G19370	571.218	1.75956	0.234498	7.50349	6.21e-14	3.77e-11
AT3G19550	6373.05	1.99342	0.403606	4.93903	7.85e-07	4.72e-05
AT3G19850	81.0478	3.68108	0.470518	7.82345	5.14e-15	4.33e-12
AT3G20015	67.0852	1.51138	0.477928	3.16236	0.00156497	0.0158649
AT3G20350	221.646	1.32802	0.337243	3.93789	8.22e-05	0.00183234
AT3G20640	273.181	1.72742	0.343669	5.02643	5e-07	3.22e-05
AT3G20790	553.634	1.07722	0.247633	4.35005	1.36e-05	0.000464706
AT3G20860	209.728	1.48647	0.312754	4.75283	2.01e-06	9.87e-05
AT3G21055	4714.87	1.24863	0.212868	5.86575	4.47e-09	6.38e-07
AT3G21190	1570.19	1.16612	0.211081	5.5245	3.3e-08	3.32e-06
AT3G21270	1378.2	1.45588	0.219033	6.64685	2.99e-11	8.54e-09
AT3G22840	1101.22	1.64802	0.38712	4.25712	2.07e-05	0.000626276
AT3G23030	4992.32	1.05102	0.302687	3.47231	0.000516004	0.007082
AT3G23340	120.318	1.70343	0.43576	3.90911	9.26e-05	0.00198945
AT3G23410	1565.29	1.16268	0.317226	3.66515	0.000247198	0.00416862
AT3G23530	220.93	1.76609	0.411211	4.29486	1.75e-05	0.000556656
AT3G23670	45.8652	2.65903	0.494647	5.37561	7.63e-08	6.85e-06
AT3G23810	8757.42	1.80392	0.410322	4.39637	1.1e-05	0.000388149
AT3G23820	9506.68	1.20874	0.321813	3.75603	0.000172629	0.00318838
AT3G25130	534.856	2.7168	0.292261	9.2958	1.46e-20	3.54e-17
AT3G25180	33.907	4.88342	1.01744	4.79973	1.59e-06	8.15e-05
AT3G25500	1088.39	1.14846	0.212405	5.40696	6.41e-08	5.97e-06
AT3G25560	312.21	1.54167	0.287296	5.36614	8.04e-08	7.19e-06
AT3G25590	527.151	1.73568	0.262948	6.60085	4.09e-11	1.14e-08
AT3G25710	577.193	1.55895	0.244789	6.36855	1.91e-10	4.21e-08
AT3G25717	547.975	1.21228	0.291813	4.15431	3.26e-05	0.000893041
AT3G25730	471.089	1.72195	0.228927	7.52182	5.4e-14	3.38e-11
AT3G25805	168.598	1.05718	0.273131	3.87059	0.000108574	0.00223997
AT3G25920	2375.57	1.17363	0.36376	3.22639	0.00125362	0.0135742
AT3G26060	1802.85	1.32665	0.358206	3.70361	0.000212552	0.00373612
AT3G26200	36.7679	2.49579	0.714732	3.49193	0.000479546	0.00671468
AT3G26932	125.879	1.0309	0.354351	2.90927	0.00362276	0.0298171
AT3G26960	155.752	4.03732	0.429554	9.39886	5.52e-21	1.78e-17
AT3G27160	1352.92	1.33587	0.219824	6.077	1.22e-09	2.22e-07
AT3G27500	43.0938	3.17356	0.573802	5.53076	3.19e-08	3.25e-06
AT3G27830	2739.06	1.11429	0.233383	4.7745	1.8e-06	9.05e-05
AT3G28345	145.021	1.31087	0.340755	3.84694	0.0001196	0.00240603
AT3G28420	56.1822	2.76594	0.499877	5.53325	3.14e-08	3.23e-06
AT3G28455	62.2582	1.12474	0.400619	2.80751	0.00499262	0.0375951
AT3G28930	120.377	1.27567	0.356239	3.58093	0.00034238	0.00525298
AT3G29320	1753.75	1.74762	0.425029	4.11178	3.93e-05	0.00103314
AT3G29370	231.761	2.33396	0.399455	5.84287	5.13e-09	7.11e-07
AT3G29375	121.618	1.68406	0.358248	4.70083	2.59e-06	0.000120499
AT3G42660	116.066	1.47641	0.381865	3.8663	0.0001105	0.00226524
AT3G42670	96.9902	1.41582	0.447377	3.16471	0.00155237	0.0157762
AT3G43190	4893.06	1.05413	0.214421	4.91617	8.83e-07	5.2e-05
AT3G43430	63.3506	1.77554	0.610509	2.90829	0.00363409	0.0298753
AT3G43600	114.092	1.64834	0.428088	3.85047	0.000117894	0.00237909
AT3G43810	1102.04	1.10806	0.223153	4.96545	6.85e-07	4.19e-05
AT3G44220	302.263	1.8456	0.535771	3.44476	0.00057157	0.00761818
AT3G44730	157.393	2.35984	0.441212	5.34853	8.87e-08	7.54e-06
AT3G44940	83.4422	1.13579	0.348177	3.2621	0.00110591	0.0123899
AT3G44990	100.756	3.106	0.655377	4.73926	2.14e-06	0.000103994
AT3G46780	2056.51	1.24067	0.375205	3.30665	0.000944197	0.0110907
AT3G47400	115.633	1.25442	0.336889	3.72355	0.000196443	0.00350793
AT3G47620	495.829	1.17838	0.239731	4.91543	8.86e-07	5.21e-05
AT3G48030	224.439	1.4936	0.41861	3.56799	0.000359726	0.00545866
AT3G48090	177.977	1.94324	0.467615	4.15564	3.24e-05	0.000889782
AT3G48185	54.7247	1.44673	0.470473	3.07505	0.00210465	0.0199042
AT3G48200	494.733	1.48408	0.370945	4.00082	6.31e-05	0.00149468
AT3G48230	1404.79	1.38778	0.306593	4.52647	6e-06	0.000239323
AT3G48240	195.918	1.19766	0.408081	2.93485	0.00333707	0.028147
AT3G48260	31.4956	2.30063	0.736364	3.12431	0.0017822	0.0174998
AT3G48290	181.238	1.17978	0.374914	3.1468	0.00165067	0.0165263
AT3G48460	250.995	1.89972	0.432755	4.38984	1.13e-05	0.000397088
AT3G48720	93.0478	2.26003	0.661221	3.41797	0.000630896	0.00816753
AT3G48730	1583.81	1.12156	0.285586	3.92721	8.59e-05	0.00189166
AT3G48970	24.9826	3.05395	0.749324	4.0756	4.59e-05	0.00116644
AT3G49220	4034.58	1.11387	0.26433	4.21392	2.51e-05	0.000727532
AT3G49260	38.7597	2.03691	0.629292	3.23683	0.00120865	0.0132399
AT3G49270	2424.63	1.40336	0.240508	5.83498	5.38e-09	7.4e-07
AT3G49290	388.295	1.08591	0.264886	4.09954	4.14e-05	0.00107906
AT3G49330	46.8077	2.22119	0.677569	3.27818	0.00104479	0.0118697
AT3G49650	108.095	1.09177	0.340766	3.20387	0.00135592	0.0143769
AT3G49750	139.238	1.90106	0.490056	3.87927	0.000104769	0.00218943
AT3G49960	34.9927	2.39451	0.533761	4.48611	7.25e-06	0.000276355
AT3G50010	124.29	1.64617	0.344634	4.77656	1.78e-06	8.98e-05
AT3G50110	111.085	1.37973	0.342571	4.02759	5.64e-05	0.00136434
AT3G50350	74.1459	1.66945	0.456867	3.65412	0.000258068	0.00428853
AT3G50410	78.5127	1.64082	0.562507	2.91697	0.00353444	0.0292921
AT3G50760	21.556	1.88431	0.652888	2.88612	0.00390021	0.0314629
AT3G50890	72.3376	1.83483	0.428586	4.28112	1.86e-05	0.000582578
AT3G51230	22.266	2.32459	0.681214	3.41242	0.000643881	0.00831898
AT3G51280	154.626	1.68292	0.456228	3.68876	0.000225345	0.00391237
AT3G51740	186.782	1.9665	0.330115	5.957	2.57e-09	4.12e-07
AT3G52150	1895.48	1.23403	0.207957	5.93405	2.96e-09	4.62e-07
AT3G52180	631.171	1.1155	0.311448	3.58166	0.000341412	0.00524229
AT3G52290	250.083	1.09824	0.287059	3.82584	0.000130326	0.00257113
AT3G52370	1646.08	1.86094	0.249276	7.46539	8.31e-14	4.88e-11
AT3G52500	6608.86	1.77529	0.380891	4.66089	3.15e-06	0.00014134
AT3G52900	204.267	1.06264	0.387078	2.74529	0.0060458	0.0431528
AT3G53010	233.676	1.32885	0.361579	3.67514	0.000237717	0.00407969
AT3G53100	184.331	1.83747	0.404849	4.53867	5.66e-06	0.000227067
AT3G53800	65.1897	2.81919	0.785182	3.5905	0.000330049	0.00511213
AT3G53980	32.4416	2.81755	1.00725	2.79727	0.00515372	0.038426
AT3G54120	40.0336	1.69224	0.613108	2.76011	0.00577824	0.0415952
AT3G54560	157.84	1.56388	0.316513	4.94096	7.77e-07	4.7e-05
AT3G55110	293.387	1.55421	0.375855	4.13514	3.55e-05	0.000946263
AT3G55420	335.449	1.75685	0.314053	5.59412	2.22e-08	2.38e-06
AT3G55760	754.023	1.28517	0.337029	3.81323	0.000137162	0.00266265
AT3G55990	541.077	1.78672	0.446994	3.99718	6.41e-05	0.00151229
AT3G56810	392.501	1.54459	0.249431	6.19245	5.92e-10	1.18e-07
AT3G56910	1310.34	1.23052	0.258608	4.75824	1.95e-06	9.71e-05
AT3G57670	523.121	1.34998	0.264981	5.09463	3.49e-07	2.36e-05
AT3G58120	23.1763	6.26309	1.30024	4.81686	1.46e-06	7.57e-05
AT3G59400	967.514	1.45102	0.250151	5.80056	6.61e-09	8.72e-07
AT3G59680	523.612	1.29167	0.285393	4.52595	6.01e-06	0.000239426
AT3G59890	273.071	1.79789	0.497192	3.61609	0.000299081	0.00476445
AT3G60580	59.1349	1.87141	0.420752	4.44776	8.68e-06	0.000319905
AT3G61380	327.505	1.02815	0.226196	4.54537	5.48e-06	0.000221562
AT3G61550	109.36	1.06593	0.390849	2.72722	0.006387	0.0448272
AT3G61870	1760.91	1.40275	0.234388	5.98474	2.17e-09	3.53e-07
AT3G62020	386.382	1.39354	0.411303	3.38812	0.000703746	0.00884495
AT3G62100	138.422	1.9904	0.510587	3.89826	9.69e-05	0.00205797
AT3G62960	42.5483	3.06249	0.872585	3.50967	0.000448663	0.00639303
AT3G63240	126.899	1.22731	0.332567	3.69042	0.000223886	0.00389561
AT3G63440	567.507	1.07941	0.36379	2.96712	0.00300602	0.0260773
AT4G00050	330.194	1.74596	0.453242	3.85216	0.000117083	0.00236766
AT4G00490	449.845	1.19661	0.28042	4.2672	1.98e-05	0.000607396
AT4G00670	69.1341	1.08949	0.404472	2.69362	0.00706807	0.0483929
AT4G01050	5444.3	1.11944	0.20903	5.35543	8.54e-08	7.42e-06
AT4G01310	1559.03	1.53002	0.241295	6.34086	2.28e-10	4.92e-08
AT4G01420	16.5974	2.26366	0.777658	2.91087	0.00360424	0.0297181
AT4G01440	110.633	1.96041	0.351686	5.57432	2.49e-08	2.58e-06
AT4G01680	403.725	1.18933	0.293906	4.04663	5.2e-05	0.00128203
AT4G01740	43.9879	1.3523	0.487529	2.77378	0.00554091	0.0403814
AT4G02290	282.654	1.19616	0.280906	4.25821	2.06e-05	0.000625389
AT4G02800	117.572	1.7723	0.503235	3.52182	0.000428588	0.00618424
AT4G02810	283.33	1.96884	0.374981	5.25051	1.52e-07	1.17e-05
AT4G03100	50.5983	1.88514	0.611529	3.08266	0.00205156	0.0195509
AT4G03190	687.44	1.0636	0.355524	2.99165	0.00277473	0.0246384
AT4G03210	965.437	1.18193	0.300091	3.93858	8.2e-05	0.00183131
AT4G05190	52.559	1.49453	0.538951	2.77304	0.00555361	0.0404587
AT4G05520	78.2272	1.14307	0.375948	3.04052	0.00236173	0.0217375
AT4G08685	769.569	1.87086	0.196586	9.51673	1.79e-21	6.93e-18
AT4G09160	73.7944	1.64516	0.503775	3.26567	0.00109206	0.0122915
AT4G09650	3030.63	1.53398	0.224231	6.8411	7.86e-12	2.58e-09
AT4G09730	639.568	1.03824	0.223914	4.63679	3.54e-06	0.000155382
AT4G09890	1183.69	1.16031	0.265575	4.36905	1.25e-05	0.000430613
AT4G09970	218.705	1.12702	0.327189	3.44454	0.000572022	0.00761897
AT4G10380	273.712	1.29402	0.457309	2.82964	0.00466009	0.0358055
AT4G11211	126.413	1.00203	0.355692	2.81713	0.00484542	0.0368354
AT4G11450	212.502	1.0378	0.236003	4.39741	1.1e-05	0.00038769
AT4G11780	32.6238	2.27692	0.770122	2.95657	0.00311079	0.026623
AT4G12420	597.627	1.51102	0.270686	5.5822	2.37e-08	2.5e-06
AT4G12730	2955.13	2.74648	0.401173	6.84612	7.59e-12	2.54e-09
AT4G12880	645.308	1.44953	0.256162	5.65863	1.53e-08	1.74e-06
AT4G13100	180.676	1.04888	0.347553	3.01791	0.00254522	0.0230219
AT4G13710	164.571	1.51418	0.410328	3.69017	0.000224104	0.00389561
AT4G13930	3728.76	1.07018	0.286274	3.7383	0.000185266	0.00335782
AT4G14330	86.0304	2.25697	0.469706	4.80507	1.55e-06	7.96e-05
AT4G14380	27.861	1.81799	0.677694	2.68261	0.00730493	0.0494811
AT4G14550	229.721	2.05866	0.419382	4.90879	9.16e-07	5.3e-05
AT4G14560	280.216	2.30666	0.437182	5.27621	1.32e-07	1.06e-05
AT4G14650	13.6532	3.53381	1.11197	3.17797	0.0014831	0.0152988
AT4G14940	164.242	1.50265	0.558622	2.68993	0.00714667	0.0487677
AT4G15450	1034.46	1.71115	0.296026	5.78041	7.45e-09	9.63e-07
AT4G15480	1499.81	1.41958	0.234306	6.05867	1.37e-09	2.44e-07
AT4G15830	189.323	2.03848	0.339164	6.01031	1.85e-09	3.12e-07
AT4G15920	200.102	2.28366	0.590115	3.86985	0.000108901	0.00224196
AT4G16140	147.543	2.04644	0.379076	5.3985	6.72e-08	6.13e-06
AT4G16780	114.107	1.45785	0.373192	3.90644	9.37e-05	0.00200716
AT4G16880	89.9788	2.23889	0.763367	2.93291	0.00335798	0.0282767
AT4G16980	1289.92	1.48742	0.269099	5.52742	3.25e-08	3.28e-06
AT4G16990	175.079	1.09688	0.343704	3.19136	0.00141606	0.014765
AT4G17240	31.3305	1.68838	0.548263	3.07951	0.00207343	0.0197204
AT4G17600	473.248	1.38928	0.270089	5.1438	2.69e-07	1.89e-05
AT4G17670	536.336	1.44189	0.385692	3.73844	0.000185164	0.00335782
AT4G17880	1414.19	1.25687	0.195433	6.43123	1.27e-10	3.08e-08
AT4G18290	258.921	3.28697	0.50622	6.49318	8.4e-11	2.14e-08
AT4G18630	28.1007	3.70817	0.833919	4.44668	8.72e-06	0.000320912
AT4G18970	3252.44	1.51259	0.384075	3.93828	8.21e-05	0.00183149
AT4G19120	823.976	1.80672	0.345698	5.22629	1.73e-07	1.32e-05
AT4G19230	212.29	1.39442	0.306044	4.55627	5.21e-06	0.000213486
AT4G20940	221.316	1.10523	0.287682	3.84183	0.00012212	0.0024476
AT4G21760	31.5448	2.88027	0.772557	3.72823	0.00019283	0.00346576
AT4G21940	111.246	1.08793	0.309135	3.51927	0.000432734	0.00622599
AT4G22010	635.353	1.22331	0.257923	4.74292	2.11e-06	0.000102904
AT4G22160	883.62	1.08181	0.319494	3.38602	0.000709154	0.00888413
AT4G22200	500.243	1.40317	0.200452	7.00004	2.56e-12	1.01e-09
AT4G22212	24.5682	1.66451	0.61742	2.69591	0.00701964	0.0481372
AT4G22290	254.783	1.45786	0.291502	5.00119	5.7e-07	3.58e-05
AT4G22490	73.3595	5.65864	1.42379	3.97435	7.06e-05	0.00163124
AT4G22560	261.704	1.73414	0.298488	5.80976	6.26e-09	8.43e-07
AT4G22580	366.47	1.05682	0.210037	5.0316	4.86e-07	3.14e-05
AT4G22756	228.978	1.19878	0.279058	4.29581	1.74e-05	0.000556087
AT4G22860	33.1942	1.8165	0.587306	3.09293	0.0019819	0.0190178
AT4G23020	231.982	1.51209	0.313701	4.82018	1.43e-06	7.48e-05
AT4G23340	529.145	1.99784	0.392054	5.09583	3.47e-07	2.35e-05
AT4G23496	231.956	4.51624	0.538724	8.38321	5.15e-17	6.66e-14
AT4G23690	1932.26	1.39623	0.42835	3.25956	0.00111585	0.0124797
AT4G23760	56.1979	1.32832	0.459657	2.88981	0.00385471	0.0312348
AT4G23790	51.963	2.84841	0.75963	3.74973	0.000177026	0.00325503
AT4G23800	145.203	1.62844	0.397424	4.0975	4.18e-05	0.00108552
AT4G23820	1531.72	1.87403	0.382896	4.89436	9.86e-07	5.63e-05
AT4G24015	64.6589	1.53839	0.519185	2.96309	0.00304565	0.0263445
AT4G24190	7975.22	1.21208	0.242381	5.00071	5.71e-07	3.58e-05
AT4G24275	40.8766	2.56969	0.629103	4.08469	4.41e-05	0.00112623
AT4G24510	625.639	1.03577	0.291308	3.55559	0.000377139	0.0056434
AT4G24930	474.89	1.08338	0.341284	3.17441	0.0015014	0.0154465
AT4G25600	79.7855	1.30315	0.459291	2.8373	0.00454975	0.0352369
AT4G25850	68.4188	1.92449	0.445216	4.32259	1.54e-05	0.000509458
AT4G25940	11.2082	2.23681	0.831478	2.69016	0.00714174	0.0487675
AT4G26150	24.2004	2.79341	0.878254	3.18064	0.00146952	0.0152254
AT4G26790	376.055	1.59979	0.360607	4.43637	9.15e-06	0.000331945
AT4G27430	1220.82	1.05302	0.200748	5.24548	1.56e-07	1.19e-05
AT4G27435	641.973	1.12207	0.263591	4.25685	2.07e-05	0.000626276
AT4G27520	2446.33	1.16564	0.269296	4.32849	1.5e-05	0.000497716
AT4G28220	300.471	1.04122	0.254046	4.09854	4.16e-05	0.00108227
AT4G28250	6248.88	1.90778	0.38271	4.98491	6.2e-07	3.84e-05
AT4G28430	25.719	2.2406	0.584108	3.83594	0.000125085	0.00249566
AT4G28630	233.781	1.09998	0.294304	3.73757	0.000185811	0.00336141
AT4G28640	290.412	1.1311	0.322351	3.50891	0.000449947	0.00639533
AT4G28660	998.519	1.12538	0.296016	3.80176	0.000143674	0.00275595
AT4G28680	68.7088	3.84288	0.813935	4.72136	2.34e-06	0.000111626
AT4G29400	111.031	1.28019	0.340458	3.7602	0.000169779	0.00314773
AT4G29920	79.7151	1.33006	0.36972	3.59748	0.000321316	0.0050131
AT4G30020	635.715	1.59885	0.308327	5.18557	2.15e-07	1.54e-05
AT4G30410	112.264	1.8524	0.638905	2.89934	0.00373947	0.0305089
AT4G30520	1478.58	1.41555	0.279498	5.06463	4.09e-07	2.73e-05
AT4G30980	411.978	1.1408	0.247569	4.608	4.07e-06	0.000173667
AT4G31470	13.1982	3.99546	1.21701	3.28301	0.00102703	0.0117576
AT4G31730	1194.72	1.54982	0.317089	4.88765	1.02e-06	5.79e-05
AT4G31820	287.416	1.48329	0.43207	3.43299	0.000596954	0.00786463
AT4G31840	399.66	1.403	0.389061	3.60611	0.00031082	0.00489264
AT4G32330	2624.91	1.01401	0.287592	3.52585	0.000422118	0.00611819
AT4G32785	21.8749	2.53464	0.885305	2.86301	0.00419634	0.0332569
AT4G32800	308.982	1.68263	0.25248	6.66439	2.66e-11	7.76e-09
AT4G32880	673.317	1.96132	0.325932	6.01756	1.77e-09	3.01e-07
AT4G33120	54.9523	3.79133	0.619717	6.11784	9.49e-10	1.8e-07
AT4G33550	12.0941	2.74892	0.942739	2.91589	0.00354678	0.0293692
AT4G33600	56.363	1.87527	0.452882	4.14075	3.46e-05	0.00092982
AT4G33790	779.476	1.6288	0.431963	3.77069	0.000162794	0.00305011
AT4G34050	10633	1.10062	0.229484	4.79605	1.62e-06	8.26e-05
AT4G34160	267.091	1.26432	0.243075	5.20136	1.98e-07	1.44e-05
AT4G34260	1520.45	1.14139	0.326121	3.4999	0.000465426	0.00658351
AT4G34400	45.9088	3.53231	0.814137	4.33871	1.43e-05	0.000481695
AT4G34560	873.41	2.03883	0.386556	5.27434	1.33e-07	1.06e-05
AT4G34588	1281.08	1.23963	0.286665	4.3243	1.53e-05	0.000506385
AT4G34590	1266.82	1.22645	0.293585	4.17749	2.95e-05	0.00082962
AT4G34760	380.733	3.05383	0.405277	7.53516	4.88e-14	3.17e-11
AT4G35320	420.138	1.14043	0.290082	3.93142	8.44e-05	0.00187329
AT4G35730	189.88	1.66632	0.283947	5.86842	4.4e-09	6.32e-07
AT4G35930	77.2534	1.22837	0.44701	2.74797	0.00599647	0.0428638
AT4G36160	130.294	1.86	0.463234	4.01524	5.94e-05	0.00143061
AT4G36360	2095.51	1.24541	0.206642	6.0269	1.67e-09	2.87e-07
AT4G36380	1102	1.21037	0.281575	4.29858	1.72e-05	0.000550096
AT4G36540	386.51	1.95618	0.306069	6.3913	1.64e-10	3.87e-08
AT4G36880	75.5017	2.19957	0.452626	4.85957	1.18e-06	6.46e-05
AT4G36910	538.284	1.18264	0.249135	4.74699	2.06e-06	0.000101113
AT4G37110	81.301	1.44752	0.394713	3.66726	0.000245164	0.00415239
AT4G37400	41.2083	2.12472	0.542867	3.91389	9.08e-05	0.00196632
AT4G37450	1100.16	2.15331	0.352537	6.10805	1.01e-09	1.9e-07
AT4G37490	34.7283	1.599	0.555189	2.88009	0.00397556	0.0318983
AT4G37590	2129.71	1.06179	0.275257	3.85743	0.000114583	0.0023317
AT4G37670	34.4753	1.30167	0.482819	2.69598	0.00701816	0.0481372
AT4G38400	734.315	1.14479	0.314225	3.64322	0.000269251	0.00441012
AT4G38770	12512.3	1.79528	0.343629	5.22448	1.75e-07	1.32e-05
AT4G38840	241.852	1.77288	0.497631	3.56264	0.000367148	0.00553258
AT4G38860	372.381	2.36866	0.343176	6.90216	5.12e-12	1.81e-09
AT4G39330	10208.6	1.02791	0.232115	4.42844	9.49e-06	0.000342781
AT4G39510	579.57	1.31878	0.292176	4.51365	6.37e-06	0.000249835
AT4G39630	21.2167	1.97935	0.657281	3.01142	0.00260025	0.0233998
AT4G39940	86.5436	1.33761	0.387915	3.4482	0.000564332	0.00755285
AT4G39970	281.712	1.13219	0.349814	3.23654	0.00120988	0.0132399
AT5G01015	15.8595	4.21731	1.31682	3.20264	0.00136173	0.0144227
AT5G01075	21.1823	2.3604	0.742985	3.17691	0.00148853	0.0153385
AT5G01170	447.716	1.0862	0.300593	3.61353	0.000302051	0.00480138
AT5G01190	372.303	1.75121	0.4709	3.71886	0.000200123	0.00355402
AT5G01210	5937.14	1.39141	0.324521	4.28758	1.81e-05	0.00056866
AT5G01360	697.632	1.84907	0.489867	3.77464	0.000160238	0.00300823
AT5G01370	210.206	1.25727	0.355928	3.53238	0.000411834	0.00601367
AT5G01590	1309.27	1.27377	0.242095	5.26144	1.43e-07	1.12e-05
AT5G01730	150.411	1.43776	0.371319	3.87204	0.00010793	0.0022362
AT5G01890	2716.68	1.02817	0.241367	4.2598	2.05e-05	0.000622299
AT5G01910	20.6077	1.92265	0.6412	2.99851	0.00271299	0.0241788
AT5G02190	431.154	1.62383	0.341431	4.75596	1.98e-06	9.77e-05
AT5G02370	82.9168	1.05726	0.332442	3.1803	0.00147123	0.0152331
AT5G02450	778.451	1.03516	0.326225	3.17315	0.00150794	0.0154891
AT5G02540	4401.65	1.53837	0.334396	4.60043	4.22e-06	0.000178523
AT5G02640	430.92	2.06249	0.326454	6.31786	2.65e-10	5.63e-08
AT5G02750	570.922	1.23466	0.374724	3.29485	0.000984738	0.0114148
AT5G02760	508.799	3.73177	0.517238	7.21481	5.4e-13	2.55e-10
AT5G02890	1383.35	1.60596	0.303692	5.28813	1.24e-07	9.99e-06
AT5G03545	26.3168	2.15722	0.648242	3.3278	0.000875355	0.0104595
AT5G03720	79.1304	1.23048	0.422279	2.91391	0.00356931	0.0295054
AT5G03760	512.966	1.96287	0.333106	5.89263	3.8e-09	5.58e-07
AT5G04160	285.293	1.28798	0.310263	4.15126	3.31e-05	0.000900597
AT5G04820	368.838	1.07284	0.340133	3.15419	0.00160943	0.016197
AT5G05420	28.1525	1.64074	0.602984	2.72104	0.00650764	0.0453803
AT5G05830	123.33	1.31207	0.354612	3.70003	0.000215578	0.00376979
AT5G05840	30.2105	2.5413	0.640089	3.97022	7.18e-05	0.0016558
AT5G05960	51.5717	2.04583	0.732518	2.79287	0.00522431	0.0388925
AT5G06390	1412.34	1.00327	0.269296	3.72553	0.000194901	0.00348362
AT5G06610	396.871	1.17352	0.325165	3.60898	0.000307399	0.00486247
AT5G06670	142.835	1.66118	0.420596	3.94958	7.83e-05	0.00176932
AT5G06800	61.7375	1.61817	0.494522	3.2722	0.00106715	0.0120706
AT5G06940	111.453	1.29399	0.384364	3.36656	0.000761126	0.00939562
AT5G07030	11976.1	1.25777	0.33727	3.72926	0.000192042	0.00345481
AT5G07770	113.146	1.2694	0.428633	2.9615	0.00306143	0.0263947
AT5G07800	141.168	1.61987	0.333988	4.85006	1.23e-06	6.69e-05
AT5G07870	30.5823	1.77048	0.545857	3.24349	0.00118077	0.0130254
AT5G08000	213.133	1.49591	0.39246	3.81161	0.000138062	0.00267743
AT5G08260	3322.39	1.2909	0.330188	3.90959	9.25e-05	0.00198794
AT5G08280	2526.78	1.02147	0.252838	4.04001	5.34e-05	0.00131041
AT5G08370	2091.87	1.8156	0.315818	5.74889	8.98e-09	1.13e-06
AT5G08640	314.019	1.50438	0.294584	5.1068	3.28e-07	2.25e-05
AT5G09220	5069.59	1.22145	0.300291	4.06757	4.75e-05	0.00119492
AT5G09460	357.136	1.01769	0.24498	4.15415	3.26e-05	0.000893041
AT5G09760	1379.49	1.08235	0.229355	4.71912	2.37e-06	0.000112589
AT5G09970	125.905	1.24661	0.357792	3.48418	0.000493647	0.00685766
AT5G09980	239.325	1.75837	0.273431	6.43077	1.27e-10	3.08e-08
AT5G10260	36.6556	1.98992	0.552158	3.6039	0.00031348	0.00491854
AT5G10390	179.492	1.35926	0.279917	4.85596	1.2e-06	6.53e-05
AT5G10430	309.612	2.41592	0.575046	4.20127	2.65e-05	0.000759262
AT5G11510	85.7812	1.81652	0.424788	4.27629	1.9e-05	0.000592412
AT5G11790	795.666	1.41677	0.222318	6.37271	1.86e-10	4.19e-08
AT5G11890	2208.01	1.04305	0.183349	5.68889	1.28e-08	1.49e-06
AT5G12110	81.5355	1.35289	0.453461	2.98348	0.00284988	0.0251393
AT5G12300	113.678	1.71605	0.354696	4.83809	1.31e-06	7.02e-05
AT5G13290	303.698	1.55725	0.361373	4.30925	1.64e-05	0.000532724
AT5G13460	125.23	1.99889	0.350185	5.70808	1.14e-08	1.35e-06
AT5G13510	2885.76	1.24043	0.22088	5.61586	1.96e-08	2.16e-06
AT5G13520	724.066	1.28445	0.216317	5.93784	2.89e-09	4.55e-07
AT5G14150	36.5001	1.42293	0.495092	2.87408	0.00405205	0.0323492
AT5G14230	214.691	1.45896	0.495745	2.94297	0.00325078	0.0276138
AT5G15230	1103.56	1.0952	0.390399	2.80535	0.0050262	0.0378096
AT5G15310	132.333	2.24171	0.644186	3.47991	0.00050158	0.00692816
AT5G15350	593.534	1.01923	0.248238	4.10584	4.03e-05	0.00105573
AT5G15490	4942.38	1.12024	0.295925	3.78556	0.000153362	0.0029016
AT5G15530	597.827	1.36215	0.28114	4.84509	1.27e-06	6.82e-05
AT5G15580	393.728	1.03896	0.279749	3.71389	0.000204098	0.00360809
AT5G15600	35.9898	1.85424	0.494729	3.74799	0.000178257	0.00326743
AT5G15630	505.419	1.68318	0.527421	3.19134	0.00141612	0.014765
AT5G15780	721.681	1.46913	0.197402	7.44232	9.89e-14	5.48e-11
AT5G16030	93.9038	1.7769	0.387296	4.58796	4.48e-06	0.000188295
AT5G16190	109.508	2.42869	0.350372	6.93176	4.16e-12	1.52e-09
AT5G16250	355.064	1.59015	0.329065	4.83233	1.35e-06	7.15e-05
AT5G16340	196.932	1.39796	0.374027	3.73758	0.000185804	0.00336141
AT5G16350	164.139	1.95272	0.397143	4.91693	8.79e-07	5.2e-05
AT5G16530	33.577	2.99522	0.809865	3.69841	0.00021695	0.00379037
AT5G16570	141.811	1.37464	0.472714	2.90799	0.00363765	0.0298919
AT5G16720	343.996	1.1077	0.222321	4.98245	6.28e-07	3.88e-05
AT5G17420	759.119	1.38575	0.454794	3.04699	0.00231146	0.0214172
AT5G18020	17.0248	2.76041	0.834867	3.30641	0.000945002	0.0110935
AT5G18240	374.473	1.40349	0.286893	4.89203	9.98e-07	5.68e-05
AT5G18660	818.195	1.13731	0.288502	3.94211	8.08e-05	0.00181286
AT5G19040	105.514	1.97073	0.41449	4.75458	1.99e-06	9.81e-05
AT5G19220	293.231	1.57942	0.541026	2.9193	0.0035082	0.0291406
AT5G19250	946.514	1.46049	0.397611	3.67315	0.000239578	0.00409767
AT5G19260	184.453	2.65132	0.403135	6.57675	4.81e-11	1.31e-08
AT5G19530	2019.23	1.76428	0.320595	5.50315	3.73e-08	3.65e-06
AT5G19730	227.158	1.1726	0.318147	3.68573	0.00022805	0.00394521
AT5G19890	95.1773	2.30189	0.582723	3.95023	7.81e-05	0.00176676
AT5G20540	527.126	1.14236	0.288015	3.96633	7.3e-05	0.00167709
AT5G22090	4054.19	1.52132	0.295246	5.15274	2.57e-07	1.82e-05
AT5G22430	15.8503	3.3478	1.13881	2.93974	0.00328491	0.027855
AT5G22580	625.069	2.62129	0.821515	3.1908	0.00141879	0.0147769
AT5G22740	1335.32	1.246	0.333142	3.74014	0.000183919	0.0033459
AT5G22860	147.667	1.59032	0.538452	2.95351	0.00314184	0.0268176
AT5G22880	1415.54	1.04483	0.206392	5.06233	4.14e-07	2.74e-05
AT5G23100	93.7167	1.67607	0.386796	4.33322	1.47e-05	0.000492173
AT5G23360	153.235	1.41096	0.526439	2.68019	0.00735807	0.0497369
AT5G23370	197.001	1.78308	0.52317	3.40822	0.000653872	0.00840829
AT5G23480	17.2572	2.18074	0.783679	2.78269	0.00539103	0.0396125
AT5G23860	1213.95	1.99105	0.472733	4.2118	2.53e-05	0.000732218
AT5G23910	63.4411	1.4018	0.412479	3.39848	0.00067762	0.00861598
AT5G23940	8367.22	1.6112	0.282218	5.70907	1.14e-08	1.35e-06
AT5G24580	279.718	2.65004	0.233936	11.3281	9.53e-30	1.85e-25
AT5G24990	489.651	1.309	0.340066	3.84926	0.000118477	0.00238838
AT5G25090	33.8385	1.76696	0.599644	2.94668	0.00321209	0.0273211
AT5G25390	1978.1	1.62963	0.400803	4.06591	4.78e-05	0.0012019
AT5G25460	495.675	1.73502	0.53602	3.23685	0.00120856	0.0132399
AT5G25620	235.062	1.90855	0.296015	6.44749	1.14e-10	2.83e-08
AT5G25880	136.911	3.15965	0.523318	6.03772	1.56e-09	2.75e-07
AT5G26670	209.568	2.43832	0.497772	4.89846	9.66e-07	5.54e-05
AT5G27290	267.054	1.29795	0.304865	4.25744	2.07e-05	0.000626276
AT5G27550	140.005	1.30113	0.305701	4.25623	2.08e-05	0.000627049
AT5G28500	2308.89	1.03727	0.281903	3.67953	0.000233663	0.00402348
AT5G28510	411.755	1.14734	0.422593	2.71501	0.00662744	0.0459207
AT5G28520	49.2251	1.85948	0.545981	3.40576	0.000659798	0.00845142
AT5G28750	1256.85	1.09671	0.238927	4.59015	4.43e-06	0.000186731
AT5G33370	906.994	4.48683	0.846575	5.29998	1.16e-07	9.48e-06
AT5G35670	673.011	2.04414	0.259298	7.88337	3.19e-15	2.81e-12
AT5G35740	149.065	2.50379	0.599804	4.17435	2.99e-05	0.000837498
AT5G36710	29.7911	1.97777	0.596705	3.31449	0.000918103	0.0108566
AT5G36800	30.8254	1.83556	0.648298	2.83134	0.00463528	0.0357231
AT5G37000	54.7375	1.82282	0.590432	3.08727	0.00202003	0.0192883
AT5G37260	234.946	1.16946	0.310163	3.77047	0.000162941	0.00305011
AT5G37300	533.581	1.97725	0.409803	4.82488	1.4e-06	7.38e-05
AT5G37478	72.4101	1.91824	0.558969	3.43174	0.000599723	0.00788504
AT5G37730	85.9881	2.00276	0.707337	2.83141	0.00463438	0.0357231
AT5G38010	31.38	1.85142	0.59807	3.09565	0.00196381	0.0188629
AT5G38430	2283.41	1.60786	0.441497	3.64183	0.000270705	0.00442663
AT5G38800	240.286	2.74509	0.478308	5.73917	9.51e-09	1.18e-06
AT5G39090	550.229	1.07428	0.380111	2.82622	0.0047101	0.0360185
AT5G39320	570.828	1.27836	0.299558	4.26749	1.98e-05	0.000607396
AT5G39420	54.9914	2.96984	0.66139	4.4903	7.11e-06	0.000272053
AT5G39550	137.207	1.12974	0.310882	3.63399	0.000279074	0.00453273
AT5G39860	138.372	3.10707	0.657699	4.72415	2.31e-06	0.000110375
AT5G39865	52.3545	1.43517	0.4335	3.31066	0.000930747	0.0109593
AT5G40150	516.343	1.18459	0.266757	4.4407	8.97e-06	0.000328088
AT5G40380	753.733	1.24312	0.269993	4.60429	4.14e-06	0.00017563
AT5G40950	1750.79	1.03379	0.247938	4.16955	3.05e-05	0.000852856
AT5G41060	410.945	1.05521	0.31742	3.32432	0.000886338	0.0105777
AT5G41140	194.744	1.20417	0.280653	4.29062	1.78e-05	0.00056369
AT5G41460	195.238	2.09053	0.465804	4.48799	7.19e-06	0.000274469
AT5G41620	148.877	1.46579	0.291166	5.03423	4.8e-07	3.12e-05
AT5G41900	108.443	1.94324	0.536403	3.62273	0.000291509	0.00467982
AT5G42020	6433.44	1.0294	0.285113	3.61049	0.000305622	0.00484225
AT5G42860	309.159	2.33797	0.310305	7.53443	4.9e-14	3.17e-11
AT5G42880	41.886	1.42979	0.48914	2.92308	0.00346588	0.0289091
AT5G43150	423.632	1.03367	0.355186	2.91021	0.00361182	0.0297477
AT5G43700	1891.81	1.42606	0.307211	4.64194	3.45e-06	0.000152124
AT5G43860	90.7036	1.55666	0.53354	2.9176	0.00352736	0.0292709
AT5G43870	200.328	1.63253	0.379488	4.30192	1.69e-05	0.00054456
AT5G44030	1173.74	1.51399	0.461302	3.282	0.00103074	0.0117793
AT5G44130	1375.29	2.40868	0.45121	5.33827	9.38e-08	7.95e-06
AT5G44260	32.6623	3.20398	0.835704	3.83387	0.000126141	0.00251173
AT5G44440	119.227	5.20645	1.3585	3.8325	0.000126846	0.00251784
AT5G44620	1578.68	1.3661	0.197266	6.92517	4.35e-12	1.56e-09
AT5G44635	49.6612	1.5236	0.443189	3.43781	0.000586441	0.00776303
AT5G44680	1535.33	2.79076	0.425259	6.56249	5.29e-11	1.43e-08
AT5G44785	298.698	1.01936	0.291989	3.49108	0.000481069	0.00673115
AT5G45540	33.0019	1.55107	0.567485	2.73324	0.00627145	0.0443116
AT5G45670	1169.09	1.0515	0.209354	5.02261	5.1e-07	3.27e-05
AT5G45680	312.575	1.22182	0.420983	2.90231	0.00370424	0.0302469
AT5G45700	46.2097	1.89273	0.572774	3.30449	0.000951486	0.0111494
AT5G45720	50.5331	1.90169	0.496165	3.83277	0.000126706	0.00251784
AT5G45850	39.9022	1.79161	0.656961	2.72712	0.00638903	0.0448272
AT5G45930	535.089	1.15493	0.257914	4.47796	7.54e-06	0.000283775
AT5G45970	73.8912	1.97872	0.590251	3.35234	0.000801316	0.00973857
AT5G46240	249.593	2.16272	0.264767	8.16842	3.12e-16	3.79e-13
AT5G46700	489.569	1.21801	0.2734	4.45503	8.39e-06	0.000310439
AT5G46730	548.061	1.44589	0.435334	3.32133	0.000895894	0.0106655
AT5G48460	819.633	1.81229	0.287616	6.30106	2.96e-10	6.16e-08
AT5G48485	5404.64	1.56316	0.293093	5.33332	9.64e-08	8.13e-06
AT5G48490	33.4074	2.28411	0.67	3.40912	0.000651731	0.00840361
AT5G48660	160.054	1.66189	0.310394	5.35413	8.6e-08	7.44e-06
AT5G48930	7367.79	1.10206	0.260786	4.2259	2.38e-05	0.000695086
AT5G48940	26.8845	4.49504	0.838967	5.35783	8.42e-08	7.39e-06
AT5G49160	556.017	1.23969	0.275074	4.50677	6.58e-06	0.000256327
AT5G50011	54.3644	1.58502	0.495551	3.1985	0.00138146	0.0145421
AT5G50130	729.514	1.16927	0.343029	3.40865	0.000652851	0.00840687
AT5G50150	1404.53	1.42567	0.293193	4.86256	1.16e-06	6.42e-05
AT5G50720	64.3104	1.73771	0.498915	3.48298	0.000495859	0.00686872
AT5G51100	127.686	1.22276	0.371809	3.28867	0.00100662	0.011609
AT5G51670	248.938	2.23078	0.258273	8.63731	5.76e-18	8.59e-15
AT5G51720	127.698	1.33743	0.467904	2.85835	0.00425848	0.0335571
AT5G51750	4864.09	1.14493	0.267553	4.27927	1.88e-05	0.000585563
AT5G51810	1402.23	1.53815	0.357425	4.30341	1.68e-05	0.0005418
AT5G52310	218.464	1.85661	0.627037	2.96093	0.00306716	0.0263947
AT5G52870	128.924	1.47588	0.37716	3.91313	9.11e-05	0.00196972
AT5G52910	43.9896	1.65481	0.585745	2.82514	0.00472597	0.0361114
AT5G52970	296.203	1.15082	0.359504	3.20112	0.00136893	0.0144674
AT5G53200	47.1902	2.0018	0.578055	3.463	0.000534197	0.00724961
AT5G53290	53.6899	2.16879	0.482926	4.49093	7.09e-06	0.000271778
AT5G53830	1527.56	1.90373	0.285714	6.66305	2.68e-11	7.76e-09
AT5G53880	655.695	1.59366	0.407188	3.91382	9.08e-05	0.00196632
AT5G54145	92.5	1.31871	0.44386	2.97099	0.00296839	0.0258724
AT5G54630	848.232	1.12716	0.287919	3.91485	9.05e-05	0.0019645
AT5G54710	20.9726	1.98138	0.640287	3.09452	0.00197132	0.0189257
AT5G54910	139.45	1.19974	0.409023	2.93319	0.00335498	0.0282638
AT5G54970	50.7781	1.49678	0.486372	3.07745	0.00208781	0.019805
AT5G55280	467.88	1.04391	0.232956	4.48115	7.42e-06	0.00028121
AT5G55380	47.2258	1.54966	0.488593	3.17168	0.0015156	0.0155349
AT5G55690	16.8691	2.55056	0.881477	2.8935	0.00380969	0.0309515
AT5G55730	776.444	1.66089	0.219307	7.57338	3.64e-14	2.52e-11
AT5G56050	22.0742	2.64135	0.841113	3.14031	0.00168771	0.0167845
AT5G56120	35.96	1.65839	0.565037	2.93501	0.00333537	0.028147
AT5G56530	441.168	1.20468	0.34437	3.49822	0.000468379	0.00661564
AT5G56970	37.2744	2.27842	0.606349	3.75761	0.000171547	0.00317141
AT5G57130	435.739	1.04239	0.357882	2.91266	0.00358363	0.0295859
AT5G57670	46.6208	2.03714	0.726482	2.80411	0.00504558	0.0378526
AT5G57770	9.12901	6.80884	1.61267	4.2221	2.42e-05	0.000705843
AT5G58000	805.247	1.87784	0.284499	6.60052	4.1e-11	1.14e-08
AT5G58700	131.405	1.21265	0.406592	2.98246	0.0028594	0.0251827
AT5G59360	97.911	2.26443	0.434912	5.20665	1.92e-07	1.41e-05
AT5G59540	379.769	1.1359	0.418783	2.71237	0.00668031	0.0462353
AT5G59613	2020.8	1.11376	0.403792	2.75826	0.005811	0.0417897
AT5G59870	820.36	1.16127	0.239823	4.84219	1.28e-06	6.9e-05
AT5G60200	452.637	1.27628	0.451542	2.82649	0.00470619	0.0360028
AT5G60450	888.188	1.16016	0.301799	3.84414	0.000120977	0.00242993
AT5G60490	1521.46	3.02051	0.801196	3.77001	0.000163244	0.00305284
AT5G60650	51.9401	2.09106	0.72286	2.89276	0.00381877	0.0310064
AT5G60720	133.34	1.38903	0.393379	3.53103	0.000413951	0.00603137
AT5G60910	118.833	1.58269	0.534479	2.96117	0.00306468	0.0263947
AT5G61000	81.1375	1.25209	0.36213	3.45757	0.000545071	0.00736624
AT5G61200	41.3725	1.78039	0.578253	3.07891	0.00207763	0.019741
AT5G61290	24.6898	1.683	0.564745	2.9801	0.00288156	0.0253204
AT5G61480	1727.79	1.83895	0.231038	7.9595	1.73e-15	1.67e-12
AT5G62140	198.615	1.41529	0.287972	4.91469	8.89e-07	5.21e-05
AT5G62220	799.136	1.14641	0.241857	4.74002	2.14e-06	0.000103868
AT5G62280	200.4	2.9229	0.619819	4.71573	2.41e-06	0.000113368
AT5G62360	1681.76	2.61033	0.457872	5.70101	1.19e-08	1.4e-06
AT5G62500	144.685	1.50031	0.297324	5.04605	4.51e-07	2.95e-05
AT5G62710	221.089	1.1544	0.364738	3.16501	0.00155079	0.0157705
AT5G63140	850.281	1.08068	0.209507	5.15819	2.49e-07	1.77e-05
AT5G63180	3954.19	2.065	0.436999	4.72542	2.3e-06	0.000109962
AT5G64030	796.642	1.35776	0.324327	4.18639	2.83e-05	0.000804769
AT5G64980	83.6989	1.08603	0.373804	2.90534	0.00366857	0.0300634
AT5G65020	807.692	1.24178	0.305253	4.06805	4.74e-05	0.00119399
AT5G65340	15.3942	6.57007	1.39254	4.71804	2.38e-06	0.000112597
AT5G65360	1084.38	1.00442	0.189095	5.31173	1.09e-07	9e-06
AT5G65590	41.7252	1.66511	0.501153	3.32256	0.000891966	0.0106318
AT5G65670	16948.9	1.42274	0.288081	4.93868	7.87e-07	4.72e-05
AT5G66230	94.131	1.49156	0.411035	3.6288	0.000284744	0.00460939
AT5G66530	373.148	1.27754	0.304464	4.19603	2.72e-05	0.000774685
AT5G66580	277.691	1.50609	0.410838	3.66588	0.000246487	0.00416103
AT5G66800	52.6665	1.74513	0.450543	3.87339	0.000107333	0.0022286
AT5G67070	1244.31	1.83416	0.255204	7.18705	6.62e-13	3.06e-10
AT5G67090	111.851	1.34656	0.44675	3.01414	0.00257711	0.0232455
AT5G67180	666.132	1.05602	0.187973	5.61793	1.93e-08	2.15e-06
AT5G67210	586.99	1.14951	0.41402	2.77645	0.00549556	0.0401718
AT5G67390	156.222	1.33636	0.345107	3.8723	0.000107814	0.00223618

## Sheet: Auxin_BL_Common
Genes commonly upregulated between Col-0 and det2-1-/- treated with 2,4-DA versus 2,4-D and epi-BL (p<0.05, Log2Fold>1)
Name	Col0_log2	Col0_padj	det2_log2	det2_padj	Descriptions	Gene_Symbol
AT1G02460	3.07541	0.000309645	4.03732	1.78e-17	Pectin lyase-like superfamily protein;(source:Araport11)	0
AT1G02730	1.15659	0.00713396	2.22124	2.65e-17	Encodes a gene similar to cellulose synthase. Knock-out mutant has reduced growth, reduced xylan level and reduced xylan synthase activity in stems.It's expression is cell cycle dependent and it appears to function in cell plate formation.	CELLULOSE SYNTHASE-LIKE D5 (CSLD5)
AT1G03010	2.92545	2.57e-05	2.7168	3.54e-17	Phototropic-responsive NPH3 family protein;(source:Araport11)	0
AT1G03170	5.68753	3.4e-23	1.45039	1.21e-16	A member of the FAF family proteins encoded by the FANTASTIC FOUR (FAF) genes: AT4G02810 (FAF1), AT1G03170 (FAF2), AT5G19260 (FAF3) and AT3G06020 (FAF4). FAFs have the potential to regulate shoot meristem size in Arabidopsis thaliana. FAFs can repress WUS, which ultimately leads to an arrest of meristem activity in FAF overexpressing lines.	FANTASTIC FOUR 2 (FAF2)
AT1G04240	3.3838	0.014567	2.23078	8.59e-15	SHY2/IAA3 regulates multiple auxin responses in roots. It is induced rapidly by IAA, and has been shown to be phosphorylated by oat phytochrome A in vitro.	0
AT1G04430	1.70274	0.000490976	4.51624	6.66e-14	S-adenosyl-L-methionine-dependent methyltransferases superfamily protein;(source:Araport11)	0
AT1G04540	2.6482	0.00153205	1.67016	3.96e-13	Calcium-dependent lipid-binding (CaLB domain) family protein;(source:Araport11)	0
AT1G04680	2.63492	5.88e-06	1.83895	1.67e-12	Pectin lyase-like superfamily protein;(source:Araport11)	0
AT1G05470	2.86657	0.0267922	3.17204	2.81e-12	Encodes an inositol polyphosphate 5' phosphatase (5PTase) that is required for the proper recruitment of cells into developing vascular tissue in leaves and cotyledons. It is most similar to Type I 5PTases that are known to cleave a phosphate from IP3 or IP4. cvp2 mutants have elevated levels of IP3 and are hypersensitive to ABA in seed germination assays.	COTYLEDON VASCULAR PATTERN 2 (CVP2)
AT1G06149	2.38968	0.000251573	2.25546	4.85e-12	#N/A	#N/A
AT1G10640	3.61222	0.0287653	2.28042	5.48e-11	Pectin lyase-like superfamily protein;(source:Araport11)	0
AT1G11860	1.09891	0.0055825	1.83416	3.06e-10	T-protein is the aminomethyltransferase of the glycine cleavage multienzyme system GCS.	(GLDT)
AT1G12260	2.13282	0.0284757	2.31223	6.62e-10	Encodes a NAC-domain transcription factor that is expressed in developing xylem. Over expression of this protein causes ectopic secondary cell wall growth. Complements some of the cell wall defects seen in SND1/NST1 double mutants.	NAC 007 (NAC007)
AT1G12330	1.74373	0.00514188	1.57782	6.62e-10	cyclin-dependent kinase-like protein;(source:Araport11)	0
AT1G12380	2.00047	6.05e-05	3.45307	6.7e-10	hypothetical protein;(source:Araport11)	0
AT1G12500	1.56049	3.05e-07	1.64576	6.7e-10	Nucleotide-sugar transporter family protein;(source:Araport11)	0
AT1G12570	4.65554	0.00378554	2.70351	7.33e-10	Ortholog of maize IPE1 gene which is involved in pollen exine development.	0
AT1G13250	2.52966	0.000378761	1.40317	1.01e-09	Encodes a protein with putative galacturonosyltransferase activity.	GALACTURONOSYLTRANSFERASE-LIKE 3 (GATL3)
AT1G14440	5.62396	7.22e-05	2.74648	2.54e-09	homeobox protein 31;(source:Araport11)	HOMEOBOX PROTEIN 31 (HB31)
AT1G14840	2.73818	0.00596172	1.86376	4.33e-09	Encodes a microtubule associated protein (MAP70-4). Expressed in all tissues.	MICROTUBULE-ASSOCIATED PROTEINS 70-4 (MAP70-4)
AT1G15260	2.73299	0.000943369	2.02229	4.85e-09	LOW protein: ATP-dependent RNA helicase-like protein;(source:Araport11)	0
AT1G15550	2.568	0.000528333	1.92705	6.6e-09	Involved in later steps of the gibberellic acid biosynthetic pathway. Activated by AGAMOUS in a cal-1, ap1-1 background. Deletion of 208 bp from -1016 to -809 (&#916;-808) resulted in loss of GA-negative feedback (this sequence, which contains a 43-bp sequence GNFEI, was shown to be sufficient for GA-negative feedback).	GIBBERELLIN 3-OXIDASE 1 (GA3OX1)
AT1G16490	8.16426	8.62e-05	1.87784	1.14e-08	Member of the R2R3 factor gene family.	MYB DOMAIN PROTEIN 58 (MYB58)
AT1G18250	4.14275	9.7e-06	1.73568	1.14e-08	encodes a thaumatin-like protein	(ATLP-1)
AT1G18840	2.20995	0.000149769	1.78291	1.44e-08	Member of IQ67 (CaM binding) domain containing family.	IQ-DOMAIN 30 (IQD30)
[truncated: 387 more rows]

## Sheet: Auxin_Col0_det2_all
DEG in Col-0 treated with 2,4-D versus det2-1-/- treated with 2,4-D.
Name	baseMean	log2FoldChange	lfcSE	stat	pvalue	padj
AT1G01010	223.445	0.297803	0.295368	1.00825	0.313337	0.581114
AT1G01020	45.8117	-0.991375	0.602661	-1.645	0.0999706	0.315354
[truncated: 21,485 more rows]

## Sheet: Auxin_det2_p<0.05<Log2Fold<-1
Genes downregulated in Col-0 treated with 2,4-D versus det2-1-/- treated with 2,4-D (p<0.05, Log2Fold<-1)
[truncated: 981 more rows]
